# Supplementary material for: An unusual autocatalysis with an air-stable Pd complex to promote enantioselective synthesis of Si-stereogenic enynes
Source: Royal Society of Chemistry journal article supplement (doi:10.1039/d2sc06181c), 2022-12-21
Supplement: d2sc06181c1.pdf [file d2sc06181c1.pdf]

## Supporting Information

### **An Unusual Autocatalysis with Air-stable Pd Complex to Promote Enantioselective Synthesis of Si- Stereogenic Enynes**

Fang-Ying Ling, Fei Ye, Xiao-Jun Fang, Xiao-Hua Zhou, Wei-Sheng Huang, Zheng Xu, and Li-Wen Xu\*

[liwenxu@hznu.edu.cn](mailto:liwenxu@hznu.edu.cn)

# Table of Contents

|                                                                                                                                                                                               |    |
|-----------------------------------------------------------------------------------------------------------------------------------------------------------------------------------------------|----|
| 1. General Information .....                                                                                                                                                                  | 4  |
| 2. Evaluation of Reaction Parameters .....                                                                                                                                                    | 5  |
| Table S1. Screening of the Chiral Phosphine Ligands.....                                                                                                                                      | 5  |
| Table S2. Screening of the Pd Catalysts.....                                                                                                                                                  | 10 |
| Table S3. Screening of the Solvents.....                                                                                                                                                      | 11 |
| Table S4. The Effect of the Temperature on the Pd -catalyzed Hydrosilylation .....                                                                                                            | 12 |
| Table S5. The Effect of the Loading of the Ligand/Catalyst on the Pd - catalyzed Hydrosilylation.....                                                                                         | 13 |
| Table S6. The Effect of the Ratio of two Substrates on this Reaction.....                                                                                                                     | 14 |
| Table S7. The Reaction Result by Different Experimental Operation on the Reaction during Pre-mixing of Catalyst and Substrate.....                                                            | 14 |
| Scheme S1. Pd-catalyzed hydrosilylation of 1a and 2a under an air atmosphere or in water..                                                                                                    | 15 |
| 3. Experimental Section .....                                                                                                                                                                 | 16 |
| 3.1 Preparation of Substrates.....                                                                                                                                                            | 16 |
| 3.2 Synthesis of hydrosilylation of 1,3-Diynes .....                                                                                                                                          | 23 |
| 3.3 Synthetic Applications of Chiral Monohydrosilanes .....                                                                                                                                   | 63 |
| 3.4 Gram-Scale Synthesis of 3a .....                                                                                                                                                          | 67 |
| 3.5 Kinetic Study for the Pd-catalyzed Hydrosilylation .....                                                                                                                                  | 68 |
| 3.6 Experiments for Mechanistic Study .....                                                                                                                                                   | 70 |
| 3.6.1 Kinetic Study for the KIE.....                                                                                                                                                          | 70 |
| 3.6.2 The NLE study of the Pd-catalyzed Hydrosilylation of 1a .....                                                                                                                           | 71 |
| 3.6.3 Competitive Experiment for the Different Reactivity of Aliphatic and Aromatic diynes. ....                                                                                              | 73 |
| 3.6.4 Comparison of <sup>31</sup> P NMR of Ligand and Pd/L33 Complex in the Reaction of 1a and 2a. ....                                                                                       | 73 |
| 3.6.5 Comparison of <sup>1</sup> H NMR of L33, Pd/L33 Complex in the Reaction of 1a and 2a... ..                                                                                              | 74 |
| 3.6.6 The determination of product-promoted palladium catalysis (autocatalysis) by chirality matching between chiral additive (3a) and chiral ligand in the Pd-catalyzed hydrosilylation..... | 76 |
| 3.6.7 CD Spectra .....                                                                                                                                                                        | 76 |

|                                                                   |     |
|-------------------------------------------------------------------|-----|
| 3.6.8 UV Spectra .....                                            | 77  |
| 3.6.9 Pd-nanoparticles catalyzed hydrosilylation.....             | 78  |
| 3.7 X-Ray Structure of 3ab .....                                  | 79  |
| 3.8 Synthesis of Polyenyne 9 by Pd-catalyzed Hydrosilylation..... | 80  |
| 3.8.1 Preparation of Polydiyne 8.....                             | 80  |
| 3.8.2 Pd-catalyzed Hydrosilylation of Polydiyne 8.....            | 80  |
| 3.8.3 CD Spectra of Polyenyne 9 .....                             | 81  |
| 3.8.4 FTIR spectra .....                                          | 82  |
| 3.8.5 SEM images .....                                            | 83  |
| 3.8.6 TG Analysis of Polydiyne 8 and Polyenyne 9 .....            | 84  |
| 4 NMR Spectra.....                                                | 85  |
| 5 References .....                                                | 145 |

## 1. General Information

Unless specifically stated, all reagents were commercially obtained and where appropriate, purified prior to use. Dichloromethane (DCM), toluene, were freshly distilled from CaH<sub>2</sub>, Ether (Et<sub>2</sub>O), tetrahydrofuran (THF), 1,4-dioxane and Cyclohexane were dried and distilled from metal sodium and benzophenone. Alcohol solvents were dried and distilled from metal magnesium. Other commercially available reagents and solvents were used directly without purification. Reactions were monitored by thin layer chromatography (TLC) using silica gel plates. Flash column chromatography was performed over silica (200 - 300 mesh). NMR spectra were recorded on a Bruker 400-, 500- (400 MHz for <sup>1</sup>H; 100 MHz for <sup>13</sup>C, 500 MHz for <sup>19</sup>F, 400MHz and 500MHz for <sup>29</sup>Si). The chemical shifts ( $\delta$ , ppm) were quoted in parts per million (ppm) referenced to TMS (0.00 ppm for <sup>1</sup>H NMR) and CDCl<sub>3</sub> (77.16 ppm for <sup>13</sup>C NMR) The following abbreviations were used to explain multiplicities: s = singlet, d = doublet, dd = doublets of doublet, t = triplet, q = quartet, m = multiplets. Coupling constants, J, were reported in Hertz unit (Hz). High resolution mass spectra (HRMS) of the products were obtained on a Bruker Daltonics micro TOF-spectrometer. HPLC analyses were carried out with an Agilent 1260 infinity, Waters AcQuity HPLC or Waters AcQuity UPLC using a chiralcel AD-H column, a chiralcel ND column, a chiralcel OX column, a chiralcel AS-H column and a chiral Phenomenex column.

## 2.Evaluation of Reaction Parameters

Table S1. Screening of the Chiral Phosphine Ligands <sup>a</sup>

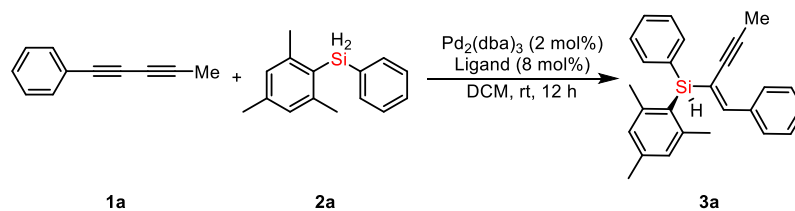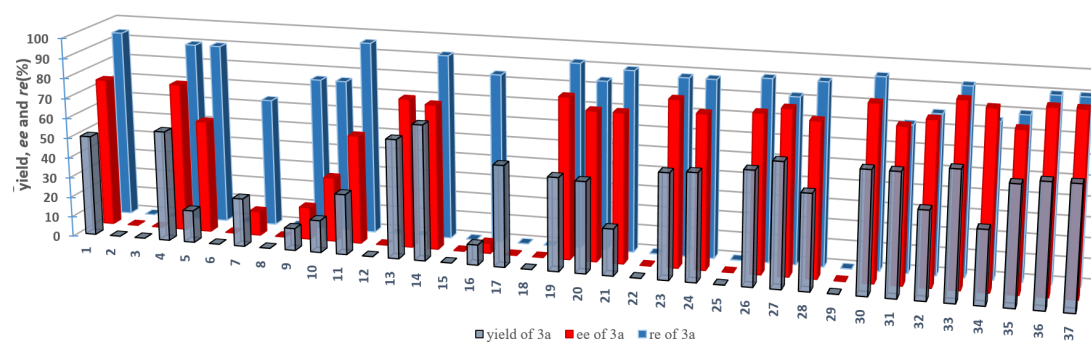

| Entry | Ligand | Yield of <b>3a</b> (%) <sup>b</sup> | <i>rr</i> of <b>3a</b> <sup>c</sup> | <i>ee</i> of <b>3a</b> (%) <sup>d</sup> |
|-------|--------|-------------------------------------|-------------------------------------|-----------------------------------------|
| 1     | L1     | 50                                  | 97:3                                | 74                                      |
| 2     | L2     | nr                                  | -                                   | -                                       |
| 3     | L3     | nr                                  | -                                   | -                                       |
| 4     | L4     | 55                                  | 95:5                                | 74                                      |
| 5     | L5     | 16                                  | 95:5                                | 56                                      |
| 6     | L6     | nr                                  | -                                   | -                                       |
| 7     | L7     | 24                                  | 82:18                               | 12                                      |
| 8     | L8     | trace                               | -                                   | -                                       |
| 9     | L9     | 11                                  | 88:12                               | 16                                      |
| 10    | L10    | 16                                  | 88:12                               | 32                                      |
| 11    | L11    | 30                                  | 98:2                                | -54                                     |
| 12    | L12    | nr                                  | -                                   | -                                       |
| 13    | L13    | 59                                  | -                                   | 74                                      |
| 14    | L14    | 67                                  | 96:4                                | 72                                      |
| 15    | L15    | nr                                  | -                                   | -                                       |
| 16    | L16    | 10                                  | 92:8                                | 5                                       |
| 17    | L17    | 50                                  | -                                   | race                                    |
| 18    | L18    | trace                               | -                                   | -                                       |
| 19    | L19    | 46                                  | 96:4                                | 80                                      |

|                 |            |       |       |    |
|-----------------|------------|-------|-------|----|
| 20              | <b>L20</b> | 45    | 92:8  | 74 |
| 21              | <b>L21</b> | 23    | 95:5  | 74 |
| 22              | <b>L22</b> | nr    | -     | -  |
| 23              | <b>L23</b> | 52    | 94:6  | 82 |
| 24              | <b>L24</b> | 53    | 94:6  | 76 |
| 25              | <b>L25</b> | nr    | -     | -  |
| 26              | <b>L26</b> | 56    | 95:5  | 78 |
| 27              | <b>L27</b> | 61    | 91:9  | 81 |
| 28              | <b>L28</b> | 47    | 95:5  | 76 |
| 29              | <b>L29</b> | trace | -     | -  |
| 30              | <b>L30</b> | 60    | 97:3  | 86 |
| 31              | <b>L31</b> | 60    | 86:14 | 76 |
| 32              | <b>L32</b> | 43    | 89:11 | 80 |
| 33              | <b>L33</b> | 63    | 96:4  | 90 |
| 34              | <b>L34</b> | 36    | 88:12 | 87 |
| 35              | <b>L35</b> | 58    | 90:10 | 78 |
| 36              | <b>L36</b> | 60    | 95:5  | 89 |
| 37              | <b>L37</b> | 60    | 95:5  | 89 |
| 38 <sup>e</sup> | <b>L12</b> | 48    | 95:5  | 73 |

<sup>a</sup>Unless otherwise noted, reactions were conducted under N<sub>2</sub> on 0.2 mmol scale: **1a** (0.2 mmol), **2a** (0.2 mmol), Pd<sub>2</sub>(dba)<sub>3</sub> (2 mol%), Ligand (8 mol%), DCM (2 mL). <sup>b</sup>Determined by <sup>1</sup>H NMR using dibromomethane as an internal standard. <sup>c</sup>Determined by GC-MS. <sup>d</sup>Determined by HPLC. <sup>e</sup>**1a** (0.2 mmol), **2a** (0.2 mmol), Pd<sub>2</sub>(dba)<sub>3</sub> (2 mol%), L12 (8 mol%), DCM (2 mL), 40 °C.

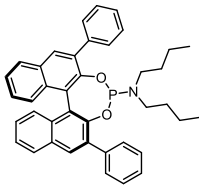

L1

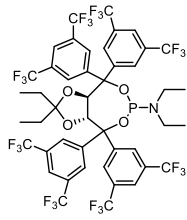

L2

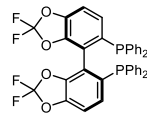

L3

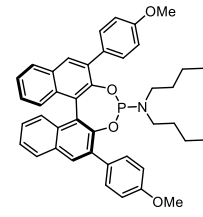

L4

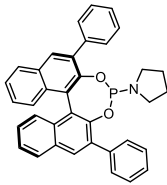

L5

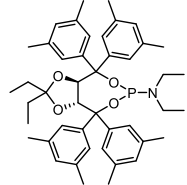

L6

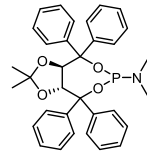

L7

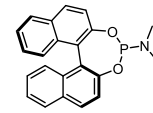

L8

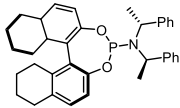

L9

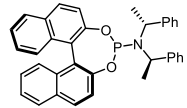

L10

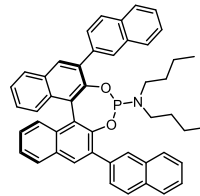

L11

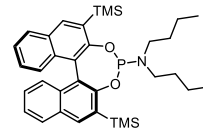

L12

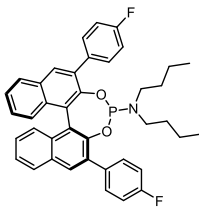

L13

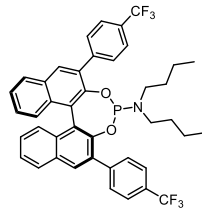

L14

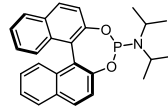

L15

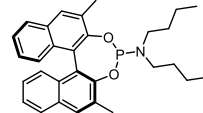

L16

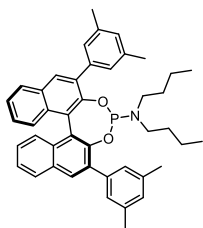

L17

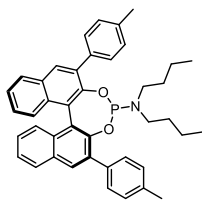

L18

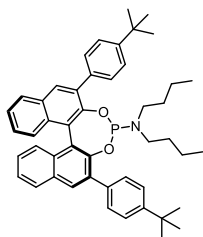

L19

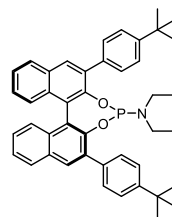

L20

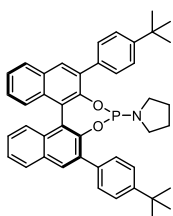

L21

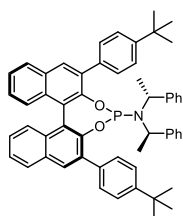

L22

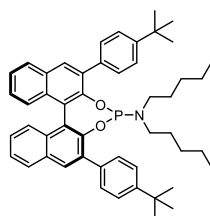

L23

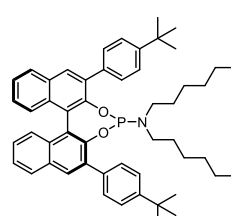

L24

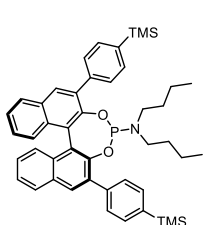

L25

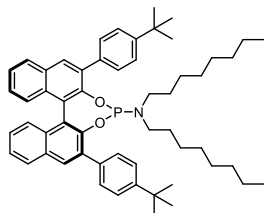

L26

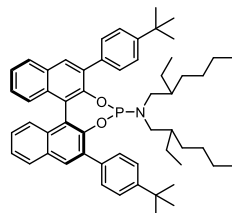

L27

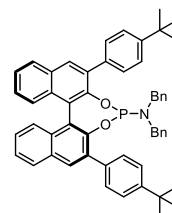

L28

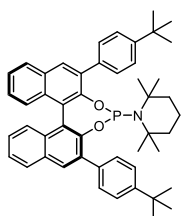

L29

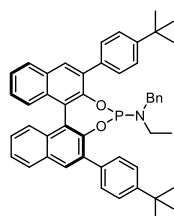

L30

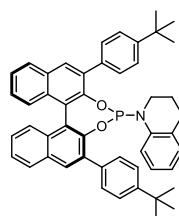

L31

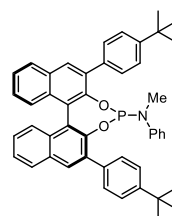

L32

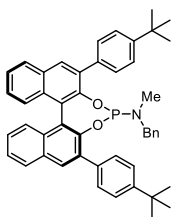

L33

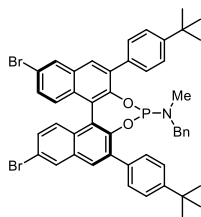

L34

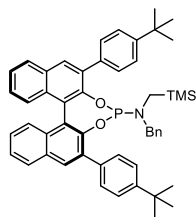

L35

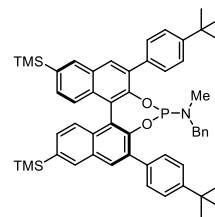

L36

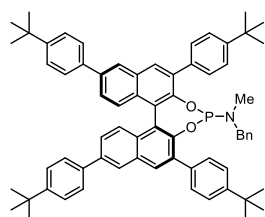

L37



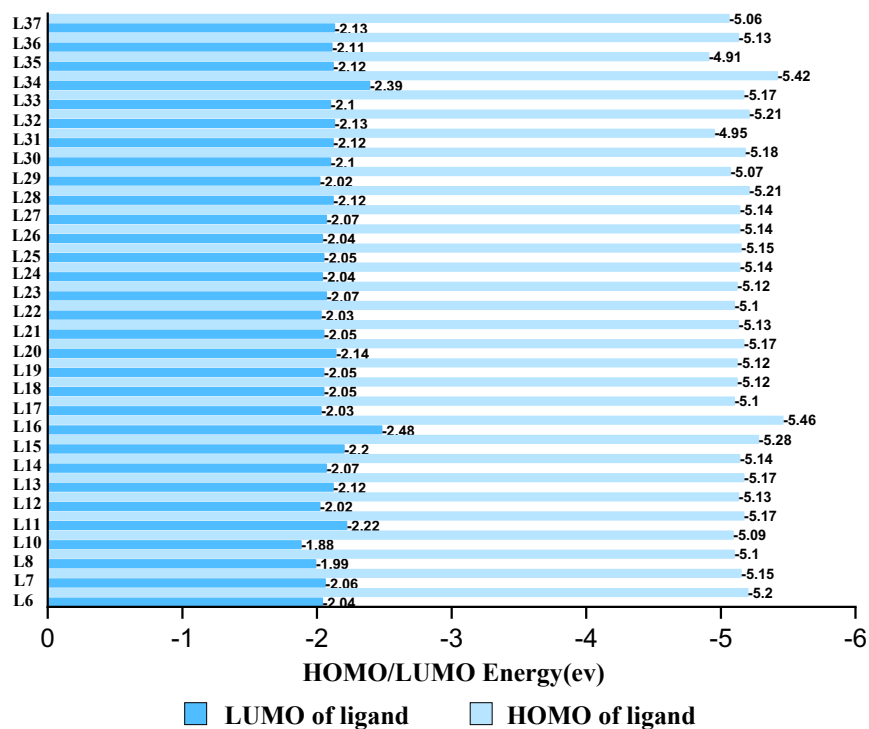

**Figure S1.** Frontline Orbital Analysis of L6-L37

**Table S2 . Screening of the Pd Catalysts <sup>a</sup>**

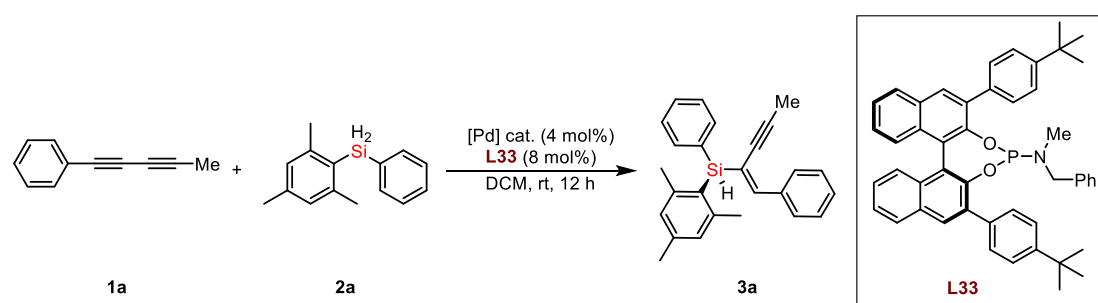

| Entry | [Pd] cat                                                               | Yield of <b>3a</b> (%) <sup>b</sup> | <i>rr</i> of <b>3a</b> <sup>c</sup> | <i>ee</i> of <b>3a</b> (%) <sup>d</sup> |
|-------|------------------------------------------------------------------------|-------------------------------------|-------------------------------------|-----------------------------------------|
| 1     | Pd <sub>2</sub> (dba) <sub>3</sub> ·CHCl <sub>3</sub>                  | 59                                  | 91:9                                | 91                                      |
| 2     | Pd(dba) <sub>2</sub>                                                   | 62                                  | 92:8                                | 91                                      |
| 3     | Pd(C <sub>3</sub> H <sub>5</sub> ) <sub>2</sub> Cl <sub>2</sub>        | 10                                  | 86:14                               | 91                                      |
| 4     | Pd(OAc) <sub>2</sub>                                                   | 56                                  | 88:12                               | 91                                      |
| 5     | Pd(cod) <sub>2</sub> Cl <sub>2</sub>                                   | nr                                  | -                                   | -                                       |
| 6     | Pd(nbd) <sub>2</sub> Cl <sub>2</sub>                                   | nr                                  | -                                   | -                                       |
| 7     | Pd(acac) <sub>2</sub>                                                  | trace                               | -                                   | -                                       |
| 8     | Pd(TFA) <sub>2</sub>                                                   | trace                               | -                                   | -                                       |
| 9     | Pd(PPh <sub>3</sub> ) <sub>4</sub>                                     | 56                                  | 85:15                               | 81                                      |
| 11    | PdCl <sub>2</sub>                                                      | trace                               | -                                   | -                                       |
| 12    | PdBr <sub>2</sub>                                                      | nr                                  | -                                   | -                                       |
| 13    | PdI <sub>2</sub>                                                       | nr                                  | -                                   | -                                       |
| 14    | Pd(CN) <sub>2</sub> Cl                                                 | nr                                  | -                                   | -                                       |
| 15    | [PdCl(2-Me-C <sub>3</sub> H <sub>4</sub> ) <sub>2</sub> ] <sub>2</sub> | 52                                  | 87:13                               | 91                                      |
| 16    | Pd <sub>2</sub> (dba) <sub>3</sub>                                     | 63                                  | 96:4                                | 90                                      |

<sup>a</sup>Unless otherwise noted, reactions were conducted under N<sub>2</sub> on 0.2 mmol scale: **1a** (0.2 mmol), **2a** (0.2 mmol), [Pd] cat. (4 mol%), Ligand (8 mol%), DCM (2 mL). <sup>b</sup>Determined by <sup>1</sup>H NMR using dibromomethane as an internal standard. <sup>c</sup>Determined by GC-MS. <sup>d</sup>Determined by HPLC.

**Table S3 . Screening of the Solvents <sup>a</sup>**

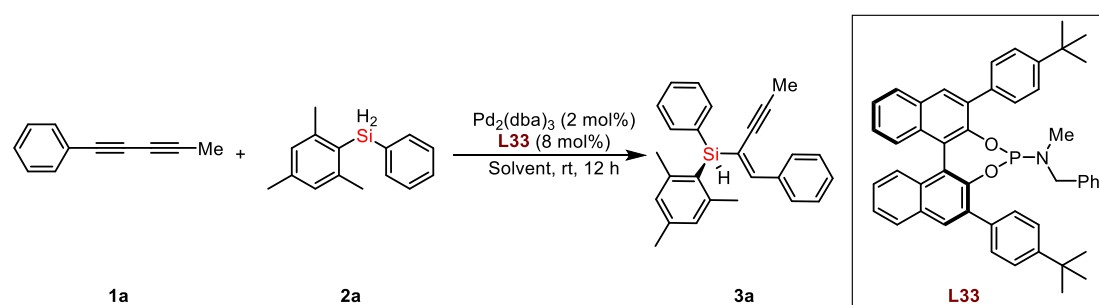

| Entry           | Solvent            | Yield of <b>3a</b> (%) <sup>b</sup> | <i>rr</i> of <b>3a</b> <sup>c</sup> | <i>ee</i> of <b>3a</b> (%) <sup>d</sup> |
|-----------------|--------------------|-------------------------------------|-------------------------------------|-----------------------------------------|
| 1               | Toluene            | 62                                  | 97:3                                | 85                                      |
| 2               | THF                | 68                                  | 97:3                                | 89                                      |
| 3               | DCE                | 60                                  | 95:5                                | 90                                      |
| 4               | Dioxane            | 60                                  | 96:4                                | 90                                      |
| 5               | Hexane             | 60                                  | 98:2                                | 91                                      |
| 6               | 2-Me-THF           | 70                                  | 97:3                                | 88                                      |
| 7               | Et <sub>2</sub> O  | 69                                  | 97:3                                | 89                                      |
| 8               | CH <sub>3</sub> CN | 19                                  | 97:3                                | 86                                      |
| 9               | THF : Hexane (1:1) | 66                                  | 96:4                                | 90                                      |
| 10 <sup>e</sup> | Hexane             | 62                                  | 98:2                                | 91                                      |
| 11              | Cyclohexane        | 65                                  | 98:2                                | 91                                      |
| 12              | Heptane            | 60                                  | 98:2                                | 91                                      |
| 13              | CHCl <sub>3</sub>  | trace                               | -                                   | -                                       |

<sup>a</sup>Unless otherwise noted, reactions were conducted under N<sub>2</sub> on 0.2 mmol scale: **1a** (0.2 mmol), **2a** (0.2 mmol), Pd<sub>2</sub>(dba)<sub>3</sub> (2 mol%), Ligand (8 mol%), Solvent (2 mL). <sup>b</sup>Determined by <sup>1</sup>H NMR using dibromomethane as an internal standard. <sup>c</sup>Determined by GC-MS. <sup>d</sup>Determined by HPLC. <sup>e</sup>5Å MS (50 mg).

**Table S4. The Effect of the Temperature on the Pd -catalyzed Hydrosilylation <sup>a</sup>**

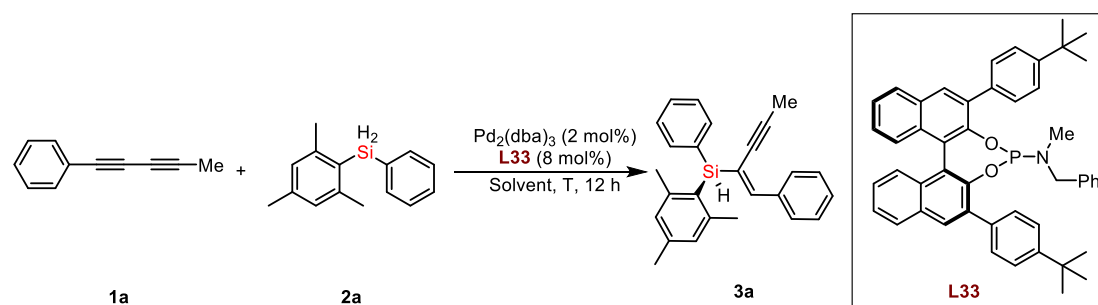

| Entry          | Solvent       | T (°C) | Yield of <b>3a</b> (%) <sup>b</sup> | <i>rr</i> of <b>3a</b> <sup>c</sup> | <i>ee</i> of <b>3a</b> (%) <sup>d</sup> |
|----------------|---------------|--------|-------------------------------------|-------------------------------------|-----------------------------------------|
| 1              | Cyclohexane   | 40     | 63                                  | 97:3                                | 89                                      |
| 2              | Cyclohexane   | 0      | 70                                  | 99:1                                | 93                                      |
| 3 <sup>e</sup> | Cyclohexane   | 25     | 77                                  | 98:2                                | 91                                      |
| 4              | Cyclohexane   | 25     | 65                                  | 98:2                                | 91                                      |
| 5              | DCM           | 0      | 48                                  | 98:2                                | 90                                      |
| 6              | DCM           | -20    | trace                               | -                                   | -                                       |
| 7              | DCM           | -40    | nr                                  | -                                   | -                                       |
| 8              | Hexane        | 0      | 62                                  | 98:2                                | 92                                      |
| 9              | Hexane        | -20    | trace                               | -                                   | -                                       |
| 10             | Cyc:Hex (1:1) | 0      | 65                                  | 98:2                                | 93                                      |
| 11             | Cyc:Hex (1:1) | -20    | nr                                  | -                                   | -                                       |

<sup>a</sup>Unless otherwise noted, reactions were conducted under N<sub>2</sub> on 0.2 mmol scale: **1a** (0.2 mmol), **2a** (0.2 mmol), Pd<sub>2</sub>(dba)<sub>3</sub> (2 mol%), Ligand (8 mol%), Solvent (2 mL). <sup>b</sup>Determined by <sup>1</sup>H NMR using dibromomethane as an internal standard. <sup>c</sup>Determined by GC-MS. <sup>d</sup>Determined by HPLC. <sup>e</sup>5Å MS (50 mg).

**Table S5. The Effect of the Loading of the Ligand/Catalyst on the Pd - catalyzed Hydrosilylation <sup>a</sup>**

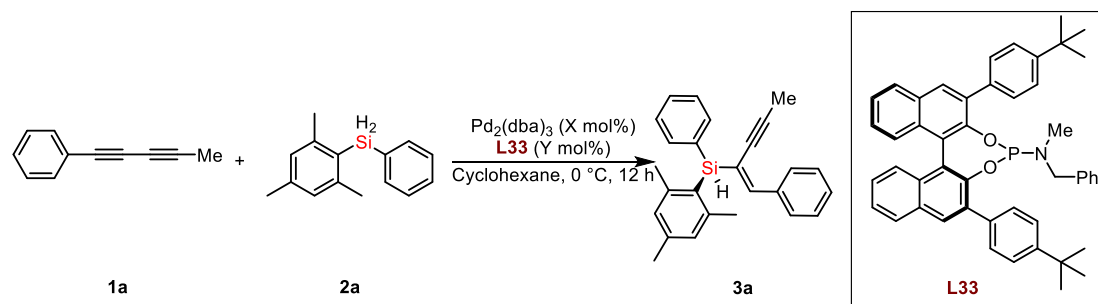

| Entry | X (mol%) | Y (mol%) | Yield of <b>3a</b> (%) <sup>b</sup> | <i>rr</i> of <b>3a</b> <sup>c</sup> | <i>ee</i> of <b>3a</b> (%) <sup>d</sup> |
|-------|----------|----------|-------------------------------------|-------------------------------------|-----------------------------------------|
| 1     | 2        | 12       | 69                                  | 99:1                                | 94                                      |
| 2     | 1        | 4        | 60                                  | 99:1                                | 93                                      |
| 3     | 2        | 4        | 53                                  | 99:1                                | 93                                      |
| 4     | 2        | 8        | 70                                  | 99:1                                | 93                                      |

<sup>a</sup>Unless otherwise noted, reactions were conducted under N<sub>2</sub> on 0.2 mmol scale: **1a** (0.2 mmol), **2a** (0.2 mmol), Pd<sub>2</sub>(dba)<sub>3</sub> (2 mol%), Ligand (8 mol%), Solvent (2 mL). <sup>b</sup>Determined by <sup>1</sup>H NMR using dibromomethane as an internal standard. <sup>c</sup>Determined by GC-MS. <sup>d</sup>Determined by HPLC.

**Table S6. The Effect of the Ratio of two Substrates on this Reaction <sup>a</sup>**

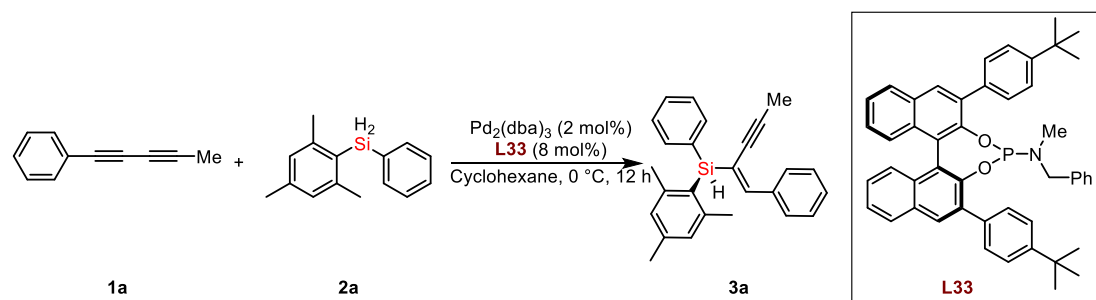

| Entry | <b>1a : 2a</b> | Yield of <b>3a</b> (%) <sup>b</sup> | <i>rr</i> of <b>3a</b> <sup>c</sup> | <i>ee</i> of <b>3a</b> (%) <sup>d</sup> |
|-------|----------------|-------------------------------------|-------------------------------------|-----------------------------------------|
| 1     | 1:2            | 67                                  | 99:1                                | 93                                      |
| 2     | 2:1            | 65                                  | 99:1                                | 93                                      |
| 3     | 1:1            | 70                                  | 99:1                                | 93                                      |

<sup>a</sup>Unless otherwise noted, reactions were conducted under N<sub>2</sub> on 0.2 mmol scale: **1a** (x mmol), **2a** (y mmol), Pd<sub>2</sub>(dba)<sub>3</sub> (2 mol%), Ligand (8 mol%), Cyclohexane (2 mL). <sup>b</sup>Determined by <sup>1</sup>H NMR using dibromomethane as an internal standard. <sup>c</sup>Determined by GC-MS. <sup>d</sup>Determined by HPLC.

**Table S7.<sup>a</sup> The Reaction Result by Different Experimental Operation on the Reaction during Pre-mixing of Catalyst and Substrate <sup>a</sup>**

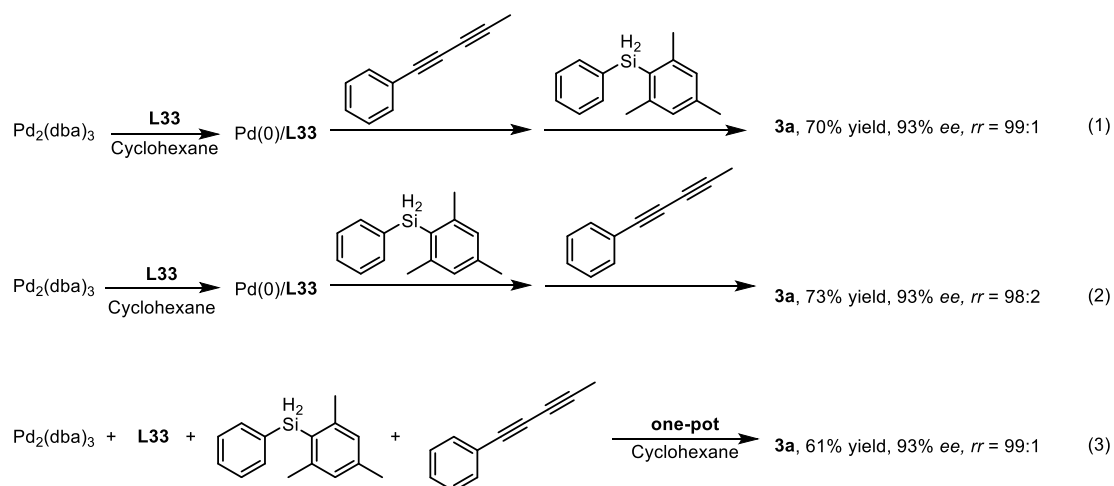

**Scheme S1. Pd-catalyzed hydrosilylation of 1a and 2a under an air atmosphere or in water**

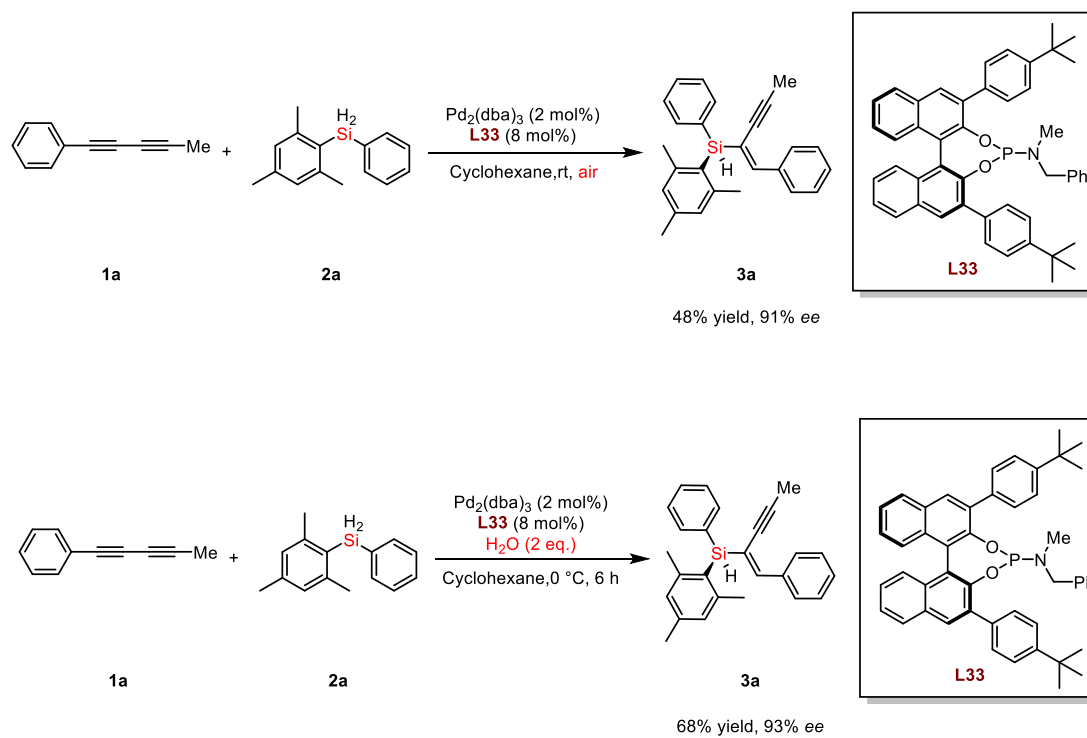

### 3. Experimental Section

#### 3.1 Preparation of Substrates

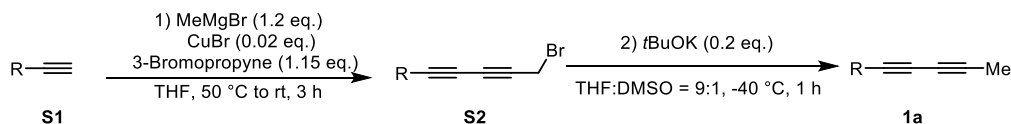

#### General procedure A for the synthesis of 1,3-diyne<sup>[1-3]</sup>:

To a solution of MeMgBr (1.2 eq., 1 M in THF) was added phenylacetylene **S1** (1.0 eq.) dropwise within 2 minutes at 50 °C under nitrogen, leading to evolution of methane. After stirred at 50 °C for 1 h, the reaction mixture was allowed to cool to room temperature. CuBr (0.02 equiv.) was added quickly to the above suspension and the reaction mixture was stirred for another 15 minutes and heated to 50 °C. Then adding propargyl bromide (1.15 eq.) into the reaction mixture and keeping stirring for 90 minutes. The reaction mixture was cooled to 0 °C using an external ice-water bath and quenched by addition of a saturated solution of ammonium chloride. The phases were separated, and the aqueous phase was extracted with ethyl acetate. The collected organic phases were dried over Na<sub>2</sub>SO<sub>4</sub>; the solvent was evaporated, affording the crude 1,4-pentadiyn-1-benzenes, which were used without further purification.

A solution of the corresponding 1,4-pentadiyn-1-benzenes in a mixture (0.3 M, 9:1 of THF and DMSO) was cooled to -40 °C. After the addition of *t*BuOK (0.02 eq.) in small portions, the reaction mixture immediately turned dark purple. Stirring was continued for 60 minutes at -40 °C. The reaction was quenched with water at -40 °C, and the resulting dark brown suspension was vigorously stirred for an additional 10 minutes. The phases were separated and the organic phase extracted three times with ether. The collected organic phases were dried over Na<sub>2</sub>SO<sub>4</sub>, and the solvents were evaporated under reduced pressure. After purification by column chromatography using PE as the eluent the product **1** was isolated.



### penta-1, 3-diyn-1-ylbenzene

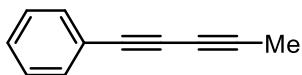

**1a** was synthesized following the general procedure A. Colorless liquid.  $^1\text{H}$  NMR (400 MHz,  $\text{CDCl}_3$ )  $\delta$  7.50 (d,  $J = 8.0$  Hz, 2H), 7.37 – 7.30 (m, 3H), 2.03 (s, 3H);  $^{13}\text{C}$  NMR (100 MHz,  $\text{CDCl}_3$ )  $\delta$  132.5, 128.9, 128.4, 122.1, 80.4, 74.5, 74.2, 64.4, 4.6.; HRMS (APCI)  $m/z$  Calcd for  $\text{C}_{11}\text{H}_8$   $[\text{2M}+\text{H}]^+$  : 281.1325, found: 281.1328

### 1-isopropyl-4-(penta-1,3-diyn-1-yl)benzene

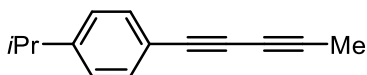

**1c** was synthesized following the general procedure A. White solid, mp 45.1 - 46.2 °C.  $^1\text{H}$  NMR (400 MHz,  $\text{CDCl}_3$ )  $\delta$  7.32 (d,  $J = 8.0$  Hz, 2H), 7.08 (d,  $J = 8.0$  Hz, 2H), 2.81 (m, 1H), 1.93 (s, 3H), 1.15 (d,  $J = 4.0$  Hz, 6H).;  $^{13}\text{C}$  NMR (100 MHz,  $\text{CDCl}_3$ )  $\delta$  150.1, 132.7, 126.7, 119.4, 80.0, 74.6, 73.8, 64.6, 34.3, 23.9, 4.8.; HRMS (APCI)  $m/z$  Calcd for  $\text{C}_{14}\text{H}_{14}$   $[\text{M}+\text{H}]^+$  : 183.1169, found: 183.1159

### 1-ethyl-4-(penta-1,3-diyn-1-yl)benzene

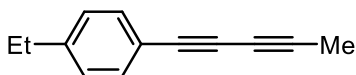

**1d** was synthesized following the general procedure A. Clorless liquid.  $^1\text{H}$  NMR (400 MHz,  $\text{CDCl}_3$ )  $\delta$  7.44 (d,  $J = 8.0$  Hz, 2H), 7.18 (d,  $J = 8.0$  Hz, 2H), 2.68 (q,  $J = 8.0, 4.0$  Hz, 2H), 2.05 (s, 3H), 1.27 (t,  $J = 8.0$  Hz, 3H).;  $^{13}\text{C}$  NMR (100 MHz,  $\text{CDCl}_3$ )  $\delta$  145.5, 132.6, 128.0, 119.2, 80.0, 74.5, 73.9, 64.6, 28.9, 15.3, 4.6.; HRMS (ESI)  $m/z$  Calcd for  $\text{C}_{13}\text{H}_{12}$   $[\text{2M}+\text{H}]^+$  : 337.1951, found: 337.1729

### 1-butyl-4-(penta-1,3-diyn-1-yl)benzene

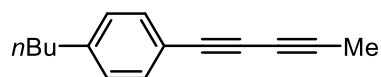

**1e** was synthesized following the general procedure A. Yellow solid, mp 41.6 – 43.5 °C. <sup>1</sup>H NMR (400 MHz, CDCl<sub>3</sub>) δ 7.38 (d, *J* = 8.0 Hz, 2H), 7.11 (d, *J* = 8.0 Hz, 2H), 2.59 (t, *J* = 8.0 Hz, 2H), 2.02 (s, 3H), 1.60 (d, *J* = 8.0 Hz, 1H), 1.54 (d, *J* = 8.0 Hz, 1H), 1.38 – 1.28 (m, 2H), 0.91 (t, *J* = 8.0 Hz, 3H).; <sup>13</sup>C NMR (100 MHz, CDCl<sub>3</sub>) δ 144.3, 132.6, 128.6, 119.2, 80.0, 77.45, 73.84, 64.57, 35.8, 33.5, 22.4, 14.1, 4.8; HRMS (APCI) *m/z* Calcd for C<sub>15</sub>H<sub>16</sub>[M+H]<sup>+</sup> : 197.1325, found: 197.1306

#### 1-(penta-1,3-diyne-1-yl)-4-pentylbenzene

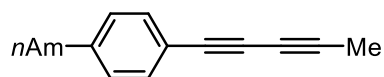

**1g** was synthesized following the general procedure A. White solid, mp 41.6 – 43.5 °C. <sup>1</sup>H NMR (400 MHz, CDCl<sub>3</sub>) δ 7.26 (d, *J* = 8.0 Hz, 2H), 6.98 (d, *J* = 8.0 Hz, 2H), 2.46 (t, *J* = 8.0 Hz, 2H), 1.86 (s, 3H), 1.51 – 1.42 (m, 2H), 1.24 – 1.14 (m, 4H), 0.77 (t, *J* = 6.7 Hz, 3H).; <sup>13</sup>C NMR (100 MHz, CDCl<sub>3</sub>) δ 144.3, 132.6, 128.6, 128.6, 119.2, 80.0, 77.5, 77.2, 76.8, 74.6, 73.8, 64.58, 36.1, 31.6, 31.0, 22.7, 14.2, 4.8.; HRMS (APCI) *m/z* Calcd for C<sub>15</sub>H<sub>16</sub>[M+H]<sup>+</sup> : 233.1481, found: 233.1202

#### 4-(penta-1,3-diyne-1-yl)-1,1'-biphenyl

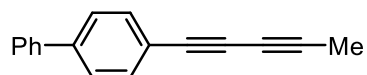

**1h** was synthesized following the general procedure A. White solid, mp 90.4 – 90.9 °C. <sup>1</sup>H NMR (400 MHz, CDCl<sub>3</sub>) δ 7.59 – 7.56 (m, 2H), 7.54 (s, 4H), 7.44 (m, 2H), 7.38 – 7.34 (m, 1H), 2.04 (s, 3H).; <sup>13</sup>C NMR (100 MHz, CDCl<sub>3</sub>) δ 141.7, 140.3, 133.1, 129.0, 127.9, 127.2, 121.0, 80.8, 75.2, 74.2, 64.5, 4.8.; HRMS (ESI) *m/z* Calcd for C<sub>17</sub>H<sub>12</sub>[M+H]<sup>+</sup> : 217.1012, found: 217.1169

#### 1-methyl-3-(penta-1,3-diyne-1-yl)benzene

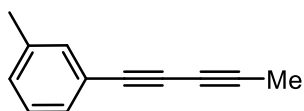

**1i** was synthesized following the general procedure A. Colorless liquid.  $^1\text{H}$  NMR (400 MHz,  $\text{CDCl}_3$ )  $\delta$  7.22 – 7.16 (m, 2H), 7.13 – 7.02 (m, 2H), 2.22 (s, 3H), 1.92 (s, 3H).;  $^{13}\text{C}$  NMR (100 MHz,  $\text{CDCl}_3$ )  $\delta$  138.2, 133.1, 129.9, 129.7, 128.3, 121.9, 80.2, 74.5, 74.2, 64.5, 21.3, 4.7.; HRMS (APCI)  $m/z$  Calcd for  $\text{C}_{12}\text{H}_{10}[\text{2M}+\text{H}]^+$  : 309.1638, found: 309.1638

#### 1-methyl-2-(penta-1,3-diyn-1-yl)benzene

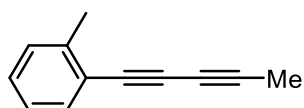

**1j** was synthesized following the general procedure A. Colorless liquid.  $^1\text{H}$  NMR (400 MHz,  $\text{CDCl}_3$ )  $\delta$  7.42 (d,  $J = 8.0$  Hz, 1H), 7.22 – 7.14 (m, 2H), 7.12 – 7.07 (m, 1H), 2.42 (s, 3H), 1.99 (s, 3H).;  $^{13}\text{C}$  NMR (100 MHz,  $\text{CDCl}_3$ )  $\delta$  141.7, 133.0, 129.6, 128.9, 125.7, 121.9, 81.0, 78.09, 77.5, 77.2, 76.8, 73.3, 64.5, 20.8, 4.8.; HRMS (ESI)  $m/z$  Calcd for  $\text{C}_{12}\text{H}_{10}[\text{2M}+\text{H}]^+$  : 309.1638, found: 309.1638

#### 1-chloro-4-(penta-1,3-diyn-1-yl)benzene

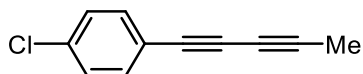

**1k** was synthesized following the general procedure A. White solid. mp 73.1 – 76.9 °C.  $^1\text{H}$  NMR (400 MHz,  $\text{CDCl}_3$ )  $\delta$  7.40 (d,  $J = 8.0$  Hz, 2H), 7.28 (d,  $J = 8.0$  Hz, 2H), 2.02 (s, 3H).;  $^{13}\text{C}$  NMR (100 MHz,  $\text{CDCl}_3$ )  $\delta$  135.1, 133.9, 128.9, 120.7, 81.1, 75.5, 73.1, 64.3, 4.8.; HRMS (ESI)  $m/z$  Calcd for  $\text{C}_{12}\text{H}_{10}[\text{2M}+\text{H}]^+$  : 349.0545, found: 349.0592

#### 1-bromo-4-(penta-1,3-diyn-1-yl)benzene

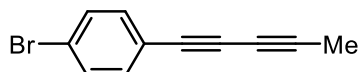

**11** was synthesized following the general procedure A. White solid. mp 60.0 – 68.2 °C. <sup>1</sup>H NMR (400 MHz, CDCl<sub>3</sub>) δ 7.44 (d, *J* = 8.0 Hz, 2H), 7.32 (d, *J* = 8.0 Hz, 2H), 2.02 (s, 3H); <sup>13</sup>C NMR (100 MHz, CDCl<sub>3</sub>) δ 134.0, 131.8, 123.4, 121.2, 81.2, 75.7, 73.1, 64.3, 4.8.; HRMS (ESI) *m/z* Calcd for C<sub>12</sub>H<sub>10</sub>[2M+H]<sup>+</sup> : 436.9535, found: 436.9546

### 1-(penta-1,3-diyn-1-yl)cyclohex-1-ene

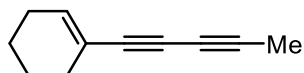

**1n** was synthesized following the general procedure A. Yellow liquid. <sup>1</sup>H NMR (400 MHz, CDCl<sub>3</sub>) δ 6.27 – 6.06 (m, 1H), 2.11 – 2.02 (m, 4H), 1.93 (s, 3H), 1.62 – 1.50 (m, 4H); <sup>13</sup>C NMR (100 MHz, CDCl<sub>3</sub>) δ 138.0, 119.8, 79.0, 76.2, 71.8, 64.5, 28.8, 25.9, 22.2, 21.4, 4.5.; HRMS (ESI) *m/z* Calcd for C<sub>12</sub>H<sub>10</sub>[M+Na]<sup>+</sup> : 167.0831, found: 167.0790

### 3-(penta-1,3-diyn-1-yl)thiophene

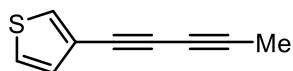

**1o** was synthesized following the general procedure A. Colorless liquid. <sup>1</sup>H NMR (400 MHz, CDCl<sub>3</sub>) δ 7.44 (d, *J* = 4.0 Hz, 1H), 7.16 (t, *J* = 4.0 Hz, 1H), 7.05 (d, *J* = 4.0 Hz, 1H), 1.93 (s, 3H); <sup>13</sup>C NMR (100 MHz, CDCl<sub>3</sub>) δ 130.9, 130.3, 125.5, 121.1, 80.3, 77.5, 77.2, 76.8, 74.1, 69.4, 64.4, 4.7.; HRMS (APCI) *m/z* Calcd for C<sub>12</sub>H<sub>10</sub>[M+H]<sup>+</sup> : 147.0263, found: 147.0256

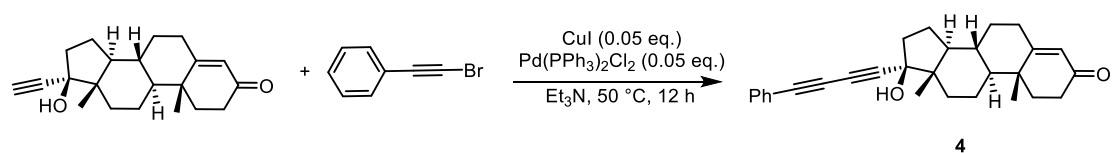

A reaction flask was charged with CuI (9.6 mg, 0.10 mmol), Pd(PPh<sub>3</sub>)<sub>2</sub>Cl<sub>2</sub> (30.4 mg, 0.10 mmol), ethisterone (138 mg, 2 mmol) and degassed Et<sub>3</sub>N (5.0 mL) under nitrogen. The bromoethynyl benzene (4 mmol) was then added to the reaction mixture

and stirred 12 h at 50 °C.

After completion of the reaction, the mixture was passed through a short celite pad using DCM as a solvent. The mixture was then concentrated in vacuo and purified by column chromatography using Petroleum ether-EtOAc (8:1) to give the desired product **4** in good yields<sup>[4]</sup>.

### General procedure B for the synthesis of dihydrosilanes and chiral phosphoramidite ligand.

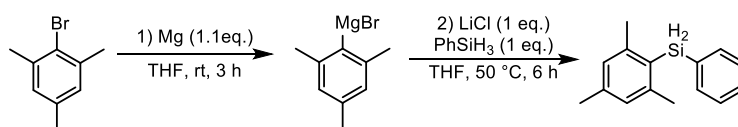

A flame dried 200 mL, round bottom flask equipped with a water-cooled condenser were added magnesium turnings (1.1 eq.), three pieces of iodine partials, THF under nitrogen. 2-bromo-1,3-diethyl-5-methylbenzene (1.0 eq.) was added slowly over 15 minutes to the refluxing mixture of THF and magnesium turnings. Following that, the mixture was refluxed for an additional 2 hour. The resulting Grignard reagent was cooled to 25 °C for the following procedure. To a suspension of LiCl (2.0 eq., 0.5 M in THF) was added the Grignard reagent (0.97 M in THF), followed by the addition of phenylsilane (1 eq.), at room temperature under argon. After the reaction mixture was stirred in an oil bath maintained at 50 °C for 6 h, the reaction was quenched by the addition of an aqueous solution of NH<sub>4</sub>Cl (10 mL) at room temperature. The resulting mixture was filtered through Celite and washed with ethyl acetate (20 mL \* 3). The organic phase was dried over Na<sub>2</sub>SO<sub>4</sub> and concentrated in vacuum to give the crude product, which was purified by chromatography on silica gel eluting with PE to afford the title compound (2.6g, 51% yield) as colorless oil<sup>[5]</sup>.

**(11bS)-N-benzyl-2,6-bis(4-(tert-butyl)phenyl)-N-methyldinaphtho[2,1-d:1',2'f][1,3,2]-dioxaphosphin-4-amine**

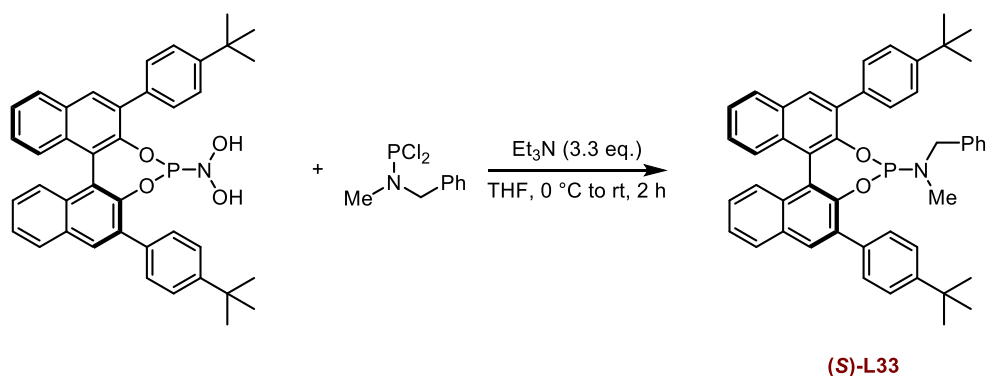

To a solution of *N*-methyl-1-phenylmethanamine (484.7 mg, 4.0 mmol) in dry THF (3 mL) was added *n*BuLi (2.5 M in hexanes, 1.6 mL, 4 mmol) dropwise at 0 °C over 3 min under argon atmosphere and the mixture was stirring at 0 °C for 30 minutes. PCl<sub>3</sub> (1.05 mL, 12.0 mmol) was added to the reaction mixture in one portion. The resulting mixture was warmed to room temperature, stirred for 1 h, and then concentrated at room temperature. The remaining PCl<sub>3</sub> was removed under vacuum. Dry THF (6 mL) was then added to the resulting residue. After stirring for 10 min, the mixture was cooled to 0 °C, followed by addition of a solution of *N*-((11*b*S)-2,6-bis(4-(tert-butyl)phenyl)dinaphtho[2,1-*d*:1',2'-*f*][1,3,2]dioxaphosphepin-4-yl)-*N*-hydroxyhydroxylamine (1255.4 mg, 2.0 mmol) and Et<sub>3</sub>N (667.9 mg, 6.6 mmol) in dry THF (15 mL) over 2 min. The mixture was warmed to room temperature and stirred 2 h. Then it was filtered and the solid was washed with DCM. The residue was purified by chromatography on silica gel, eluting with PE: EA = 100:1 to afford the products as white solid. White solid, mp 145.1 - 146.2 °C,  $[\alpha]_D^{25} = +175.7$  (*c* = 0.32, CHCl<sub>3</sub>). <sup>1</sup>H NMR (400 MHz, CDCl<sub>3</sub>) δ 8.06 (d, *J* = 12.0 Hz, 2H), 7.95 (d, *J* = 8.0 Hz, 2H), 7.78 (d, *J* = 8.0 Hz, 4H), 7.70 (d, *J* = 8.0 Hz, 4H), 7.52 (dd, *J* = 12.0, 8.0 Hz, 4H), 7.49 – 7.37 (m, 4H), 7.32 – 7.21 (m, 2H), 7.17 – 7.13 (m, 2H), 6.89 (d, *J* = 8.0 Hz, 2H), 3.56 – 3.45 (m, 1H), 3.33 – 3.19 (m, 1H), 1.77 (d, *J* = 8.0 Hz, 3H), 1.40 (d, *J* = 4.0 Hz, 18H).; <sup>13</sup>C NMR (100 MHz, CDCl<sub>3</sub>) δ 150.5, 150.4, 147.5, 147.3, 138.4, 138.3, 135.4, 135.1, 135.0, 134.2, 132.5, 132.3, 131.4, 131.1, 130.4, 130.0, 130.0, 129.9, 129.8, 128.5, 128.5, 128.2, 127.5, 127.2, 127.0, 126.9, 126.1, 126.0, 125.2, 125.1, 125.0, 124.4, 50.7, 34.8, 31.6, 31.6, 31.3, 31.1.; <sup>31</sup>P NMR (162 MHz, CDCl<sub>3</sub>) δ 143.78. HRMS (ESI) *m/z* Calcd for C<sub>48</sub>H<sub>46</sub>NO<sub>2</sub>P [M+H]<sup>+</sup> : 700.3339, found: 700.3346

## General Procedure C for the Synthesis of **3a** by Hydrosilylation of 1,3-Diynes:

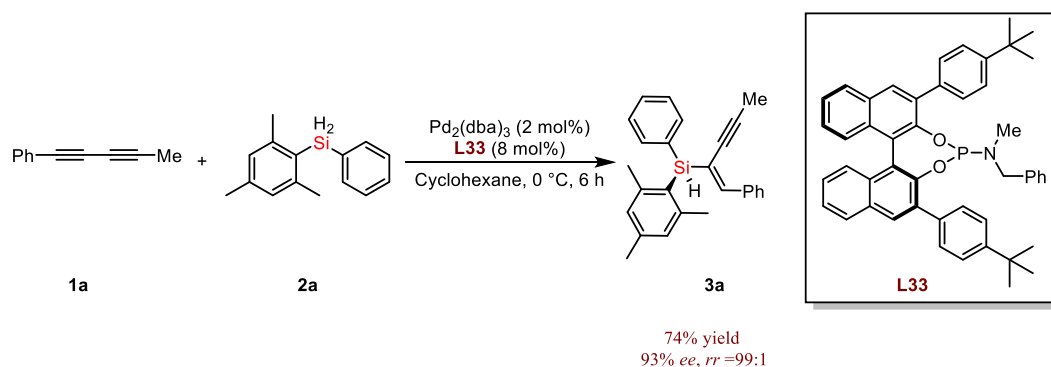

In a flame dried Schlenk tube,  $\text{Pd}_2(\text{dba})_3$  (3.7 mg, 0.004 mmol, 2 mol%), **L33** (11.2 mg, 0.016 mmol, 8 mol%) in cyclohexane (1 mL, 0.2M) was stirred at room temperature for 30 min under nitrogen atmosphere. Then diyne (0.2 mmol, 1 equiv.), dihydrosilanes were added sequentially to the reaction mixture, and the reaction tube was cooled at 0 °C and then stirred for 6 h. After completion of the reaction, the mixture was passed through a short celite pad using DCM as a solvent. The mixture was then concentrated in vacuo and purified by column chromatography using Petroleum ether-EtOAc (300:1) to give the desired product **3a** in good yields.

### 3.2 Synthesis of hydrosilylation of 1,3-Diynes

(*S,E*)-mesityl(phenyl)(1-phenylpent-1-en-3-yn-2-yl)silane:

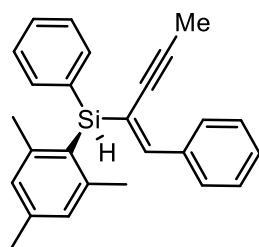

**3a** was synthesized following the general procedure C. Yellow liquid (51.2 mg, 70% yield). purified by column chromatography ( $\text{Al}_2\text{O}_3$ , PE/EA= 300:1).  $[\alpha]_{25}^D = 7.54$  ( $c = 0.14$ ,  $\text{CHCl}_3$ ).  $^1\text{H}$  NMR (400 MHz,  $\text{CDCl}_3$ )  $\delta$  7.83 (d,  $J = 8.0$  Hz, 2H), 7.56 (d,  $J = 8.0$ Hz, 2H), 7.32 – 7.16 (m, 6H), 7.32 – 7.17 (m, 3H), 2.30 (s, 6H), 2.22 (s, 3H), 1.95 (s, 3H).;  $^{13}\text{C}$  NMR (100 MHz,  $\text{CDCl}_3$ )  $\delta$  147.3, 145.8, 140.1, 137.7, 135.7, 134.0, 129.5, 128.9, 128.8, 128.7, 128.3, 128.1, 126.6, 118.8, 99.0, 80.6, 24.5, 21.4, 5.4.;  $^{29}\text{Si}$

NMR(500MHz, CDCl<sub>3</sub>)  $\delta$  21.9.; IR (KBr, cm<sup>-1</sup>): 2928.3, 2852.9, 2147.3, 1450.6, 1258.7, 1029.1, 847.9, 795.5, 739.3. HRMS (APCI) m/z Calcd for C<sub>26</sub>H<sub>26</sub>Si [M+H]<sup>+</sup>: 367.1877, found: 367.1864.

HPLC: Chiralpak AD-H column (hexanes: isopropanol = 99.7:0.3, 0.8 mL/min, 230 nm, 93% ee). tR = 9.317 min (major), tR = 6.497 min (minor).

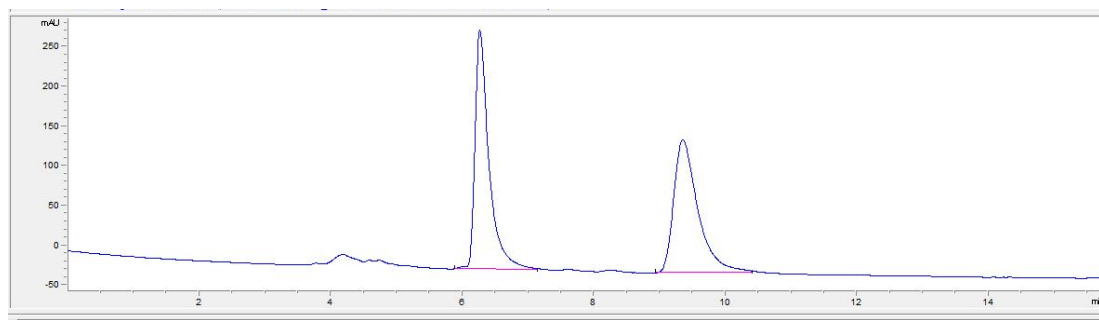

|   | Time/min | Area   | Height | Area%  |
|---|----------|--------|--------|--------|
| 1 | 6.267    | 4425.5 | 300.8  | 50.623 |
| 2 | 9.352    | 4316.5 | 167.6  | 49.377 |

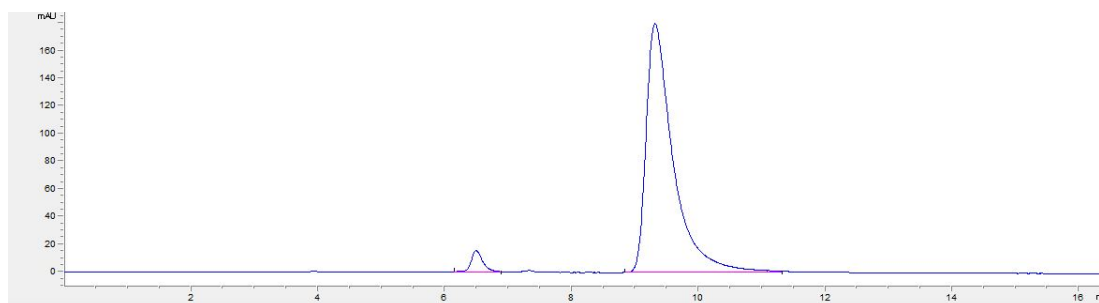

|   | Time/min | Area   | Height | Area%  |
|---|----------|--------|--------|--------|
| 1 | 6.497    | 203.8  | 15.6   | 3.670  |
| 2 | 9.317    | 5348.9 | 179.7  | 96.330 |

**(*S,E*)-mesityl(phenyl)(1-(*p*-tolyl)pent-1-en-3-yn-2-yl)silane**



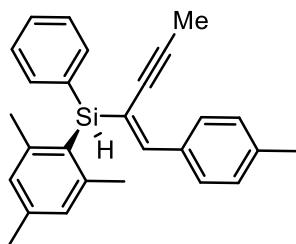

**3b** was synthesized following the general procedure C. Yellow liquid (66.2 mg, 87% yield). purified by column chromatography (Al<sub>2</sub>O<sub>3</sub>, PE/EA= 300:1). [ $\alpha$ ]<sub>25</sub><sup>D</sup> = 3.52 (c = 0.38, CHCl<sub>3</sub>). <sup>1</sup>H NMR (400 MHz, CDCl<sub>3</sub>)  $\delta$  7.86 (d, *J* = 8.0 Hz, 2H), 7.68 (d, *J* = 8.0 Hz, 2H), 7.45 - 7.35 (m, 3H), 7.19 (d, *J* = 8.0 Hz, 2H), 6.91 (s, 2H), 6.88 (s, 1H), 5.55 (s, 1H), 2.42 (s, 6H), 2.38 (s, 3H), 2.34 (s, 3H), 2.07 (s, 3H); <sup>13</sup>C NMR (100 MHz, CDCl<sub>3</sub>)  $\delta$  147.4, 145.8, 140.1, 138.8, 135.7, 135.2, 134.1, 129.5, 129.0, 128.9, 128.8, 128.0, 126.7, 117.3, 98.5, 80.8, 24.5, 21.6, 21.4, 5.4; IR (KBr, cm<sup>-1</sup>): 2927.3, 2859.5, 2147.3, 1612.4, 1432.2, 1258.7, 1025.2, 855.6, 787.8, 735.5, 622.1. HRMS (ESI) *m/z* Calcd for C<sub>27</sub>H<sub>28</sub>Si [M+H]<sup>+</sup>: 381.2034, found: 381.2255.

HPLC: Chiralpak AD-H column (hexanes: isopropanol = 99.7:0.3, 0.8 mL/min, 230 nm, 93% *ee*). tR = 10.682 min (major), tR = 6.53 min (minor).

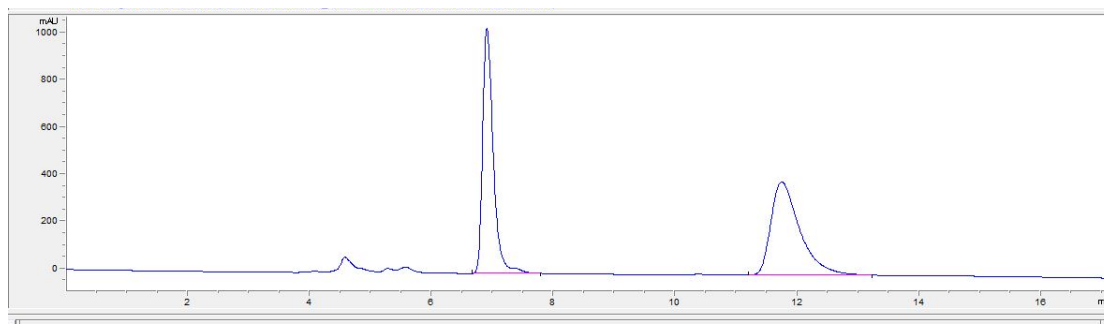

|   | Time/min | Area    | Height | Area%  |
|---|----------|---------|--------|--------|
| 1 | 6.908    | 12708.7 | 1037.3 | 49.250 |
| 2 | 11.748   | 13095.7 | 394.6  | 50.750 |

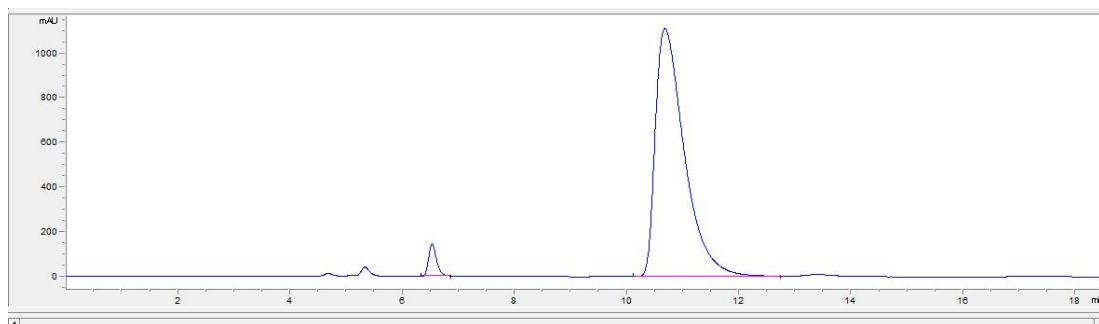

|   | Time/min | Area    | Height | Area%  |
|---|----------|---------|--------|--------|
| 1 | 6.53     | 1444.3  | 144.8  | 3.490  |
| 2 | 10.682   | 39941.6 | 1112.6 | 96.510 |

**(*S,E*)-(1-(4-isopropylphenyl)pent-1-en-3-yn-2-yl)(mesityl)(phenyl)silane**

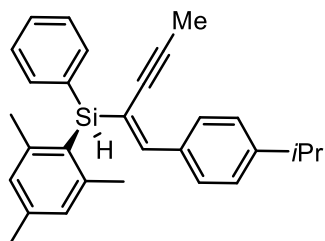

**3c** was synthesized following the general procedure C. White liquid (67.0 mg, 82% yield). purified by column chromatography (Al<sub>2</sub>O<sub>3</sub>, PE/EA= 300:1). [ $\alpha$ ]<sub>25</sub><sup>D</sup> = 0.8(c = 0.531, CHCl<sub>3</sub>). <sup>1</sup>H NMR (400 MHz, CDCl<sub>3</sub>)  $\delta$  7.92 – 7.80 (m, 2H), 7.73 – 7.54 (m, 21H), 7.44 – 7.28 (m, 3H), 7.23 – 7.18 (m, 2H), 6.86 (s, 1H), 6.84 (s, 2H), 5.49 (s, 1H), 2.98 – 2.77 (m, 1H), 2.37 (s, 6H), 2.30 (s, 3H), 2.03 (s, 3H), 1.24 (d, J = 8.0 Hz, 6H); <sup>13</sup>C NMR (100 MHz, CDCl<sub>3</sub>)  $\delta$  149.7, 147.4, 145.9, 140.1, 135.7, 135.6, 134.2, 129.5, 128.9, 128.0, 126.7, 126.4, 117.3, 98.5, 80.8, 34.2, 29.9, 24.5, 24.0, 21.4, 5.4.; <sup>29</sup>Si NMR(500MHz, CDCl<sub>3</sub>)  $\delta$  26.3.; IR (KBr, cm<sup>-1</sup>): 2968.0, 1416.7, 1266.5, 1076.6, 1013.6, 791.7, 705.4, 659.8. HRMS (ESI) m/z Calcd for C<sub>29</sub>H<sub>32</sub>Si [M+Na]<sup>+</sup> : 431.2165 , found: 431.2172

HPLC: Chiralpak AD-H column (hexanes: isopropanol = 99.7:0.3, 0.8 mL/min, 230 nm, 93% ee). tR = 10.656 min (major), tR = 6.58 min (minor).

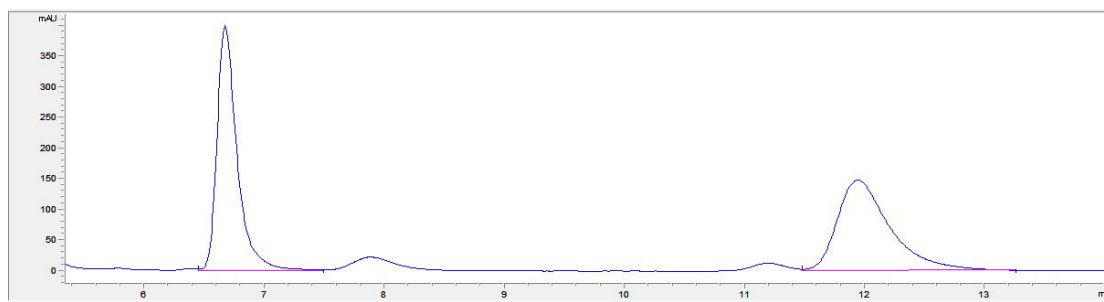

|   | Time/min | Area    | Height | Area%  |
|---|----------|---------|--------|--------|
| 1 | 6.674    | 11847.5 | 974.3  | 49.816 |
| 2 | 11.941   | 11935.2 | 388    | 50.184 |

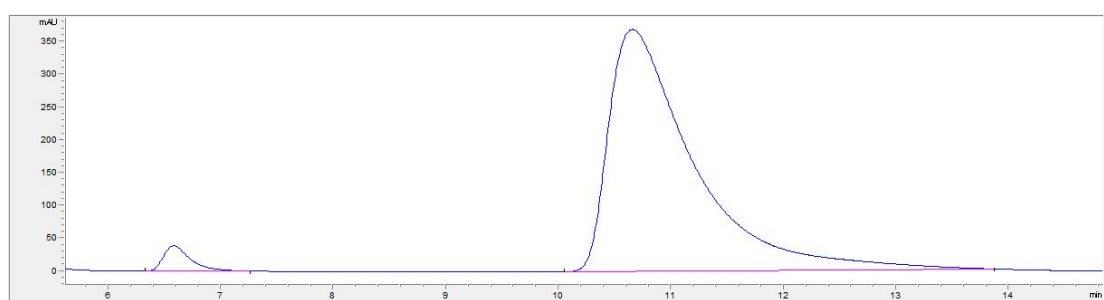

|   | Time/min | Area    | Height | Area%  |
|---|----------|---------|--------|--------|
| 1 | 6.58     | 654.3   | 38.8   | 3.261  |
| 2 | 10.656   | 19414.3 | 369    | 96.739 |

**(*S,E*)-1-(4-ethylphenyl)pent-1-en-3-yn-2-yl(mesityl)(phenyl)silane**

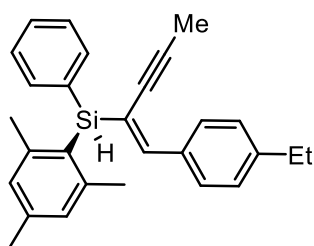

**3d** was synthesized following the general procedure C. White liquid (53.7 mg, 68% yield). purified by column chromatography (Al<sub>2</sub>O<sub>3</sub>, PE/EA= 300:1).  $[\alpha]_{25}^D = 2.49$  (c = 0.42, CHCl<sub>3</sub>). <sup>1</sup>H NMR (400 MHz, CDCl<sub>3</sub>)  $\delta$  7.86 (d, *J* = 8.0 Hz, 2H), 7.64 (d, *J* = 4.0 Hz, 2H), 7.43 – 7.33 (m, 3H), 7.19 (d, *J* = 8.0 Hz, 2H), 6.88 (s, 2H), 6.85 (s, 1H), 5.51 (s, 1H), 2.66 (q, *J* = 8.0 Hz, *J* = 16.0 Hz, 2H), 2.38 (s, 6H), 2.31 (s, 3H), 2.05 (s, 3H), 1.24 (t, *J* = 8.0 Hz, 3H).; <sup>13</sup>C NMR (100 MHz, CDCl<sub>3</sub>)  $\delta$  147.4, 145.8, 145.2, 140.1,

135.7, 135.4, 134.2, 129.5, 128.9, 128.0, 127.8, 126.7, 117.3, 98.5, 80.8, 29.9, 28.9, 24.5, 21.4, 15.6, 5.4.;  $^{29}\text{Si}$  NMR(500MHz,  $\text{CDCl}_3$ )  $\delta$  26.9.; IR (KBr,  $\text{cm}^{-1}$ ):2961.2, 2923.4, 2859.5, 2147.3, 1458.3, 1021.3, 851.7, 791.7, 729.7, 620.2. HRMS (APCI)  $m/z$  Calcd for  $\text{C}_{28}\text{H}_{30}\text{Si}$   $[\text{M}+\text{H}]^+$  : 395.2190 , found: 395.2163

HPLC: Chiralpak AD-H column (hexanes: isopropanol = 99.7:0.3, 0.8 mL/min, 230 nm, 94% *ee*).  $t_R$  = 11.334 min (major),  $t_R$  = 6.876 min (minor).

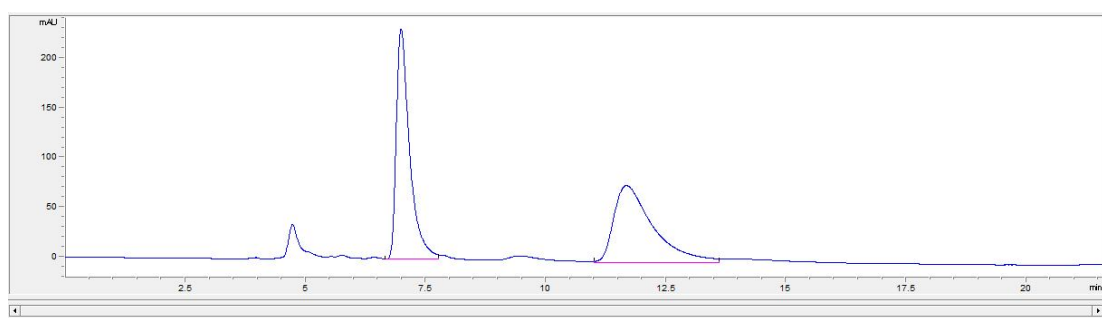

|   | Time/min | Area   | Height | Area%  |
|---|----------|--------|--------|--------|
| 1 | 6.988    | 4461.3 | 231.3  | 50.255 |
| 2 | 11.68    | 4421.5 | 77.6   | 49.775 |

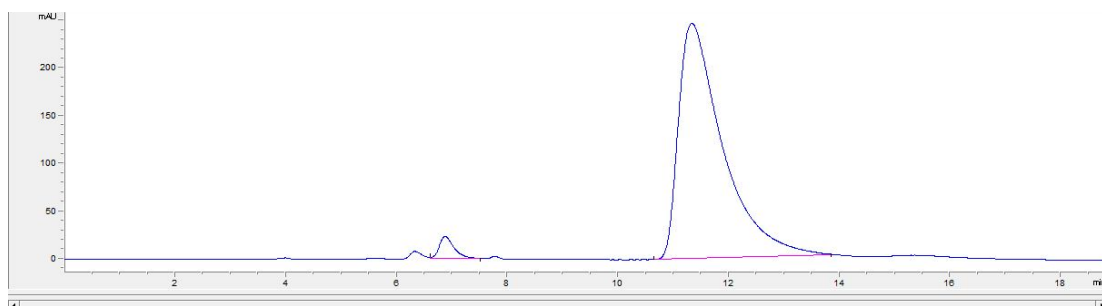

|   | Time/min | Area    | Height | Area%  |
|---|----------|---------|--------|--------|
| 1 | 6.876    | 466.7   | 23.9   | 3.298  |
| 2 | 11.334   | 13684.4 | 246.5  | 96.702 |

**(*S,E*)-(1-(4-butylphenyl)pent-1-en-3-yn-2-yl)(mesityl)(phenyl)silane**

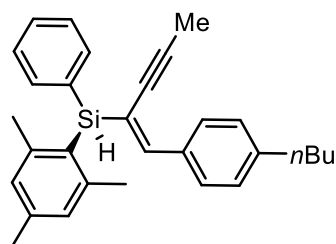

**3e** was synthesized following the general procedure C. White liquid (46.4 mg, 55% yield). purified by column chromatography (Al<sub>2</sub>O<sub>3</sub>, PE/EA= 300:1). [ $\alpha$ ]<sub>25</sub><sup>D</sup> = 1.52 (c = 0.21, CHCl<sub>3</sub>) <sup>1</sup>H NMR (400 MHz, CDCl<sub>3</sub>)  $\delta$  7.92 (d, *J* = 8.0 Hz, 2H), 7.71 (d, *J* = 4.0 Hz, 2H), 7.48 – 7.38 (m, 3H), 7.22 (d, *J* = 8.0 Hz, 2H), 6.93 (s, 2H), 6.91 (s, 1H), 5.58 (s, 1H), 2.67 (t, *J* = 8.0 Hz, 2H), 2.45 (s, 6H), 2.36 (s, 3H), 2.10 (s, 3H), 1.71 – 1.61 (m, 2H), 1.41 (dd, *J* = 12.0, 8.0 Hz, 2H), 0.99 (t, *J* = 8.0 Hz, 3H).; <sup>13</sup>C NMR (100 MHz, CDCl<sub>3</sub>)  $\delta$  147.4, 145.8, 143.8, 140.0, 135.6, 135.4, 134.2, 129.5, 128.9, 128.8, 128.4, 128.0, 126.7, 117.2, 98.5, 80.8, 35.7, 33.6, 24.5, 22.5, 21.3, 14.1, 5.4.; IR (KBr, cm<sup>-1</sup>): 2955.4, 2930.2, 2859.5, 2143.4, 1462.2, 1104.7, 1025.2, 795.5, 739.3, 610.5. HRMS (ESI) *m/z* Calcd for C<sub>30</sub>H<sub>34</sub>Si [M+Na]<sup>+</sup> : 445.2322 , found: 445.2256  
HPLC: Chiralpak AD-H column (hexanes: isopropanol = 99.7:0.3, 0.8 mL/min, 230 nm, 91% *ee*). tR = 11.95 min (major), tR = 7.282 min (minor).

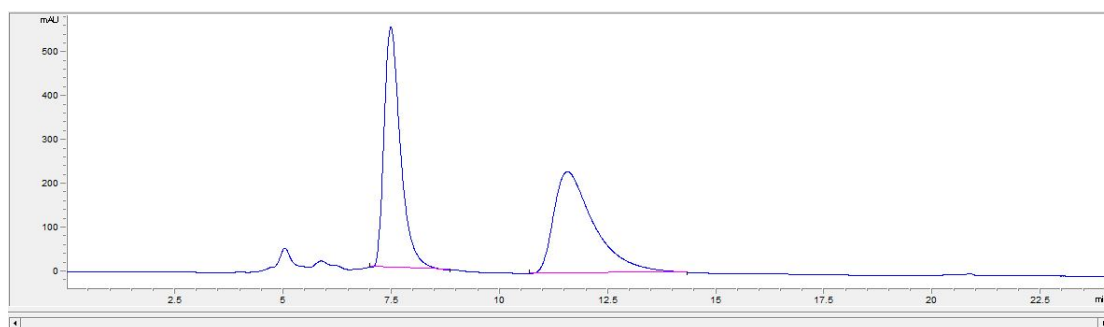

|   | Time/min | Area    | Height | Area%  |
|---|----------|---------|--------|--------|
| 1 | 7.485    | 14549.2 | 548.7  | 49.222 |
| 2 | 11.566   | 15008.8 | 231.8  | 50.778 |

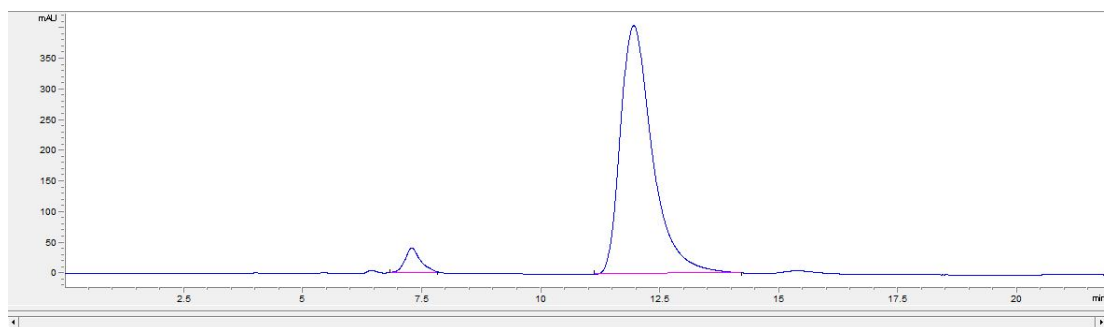

|   | Time/min | Area    | Height | Area%  |
|---|----------|---------|--------|--------|
| 1 | 7.282    | 14549.2 | 548.7  | 49.222 |
| 2 | 11.95    | 15008.8 | 231.8  | 50.778 |

|   |       |         |       |        |
|---|-------|---------|-------|--------|
| 1 | 7.282 | 953.9   | 40.4  | 4.781  |
| 2 | 11.95 | 18996.4 | 404.8 | 95.219 |

**(*S,E*)-(1-(4-(*tert*-butyl)phenyl)pent-1-en-3-yn-2-yl)(mesityl)(phenyl)silane**

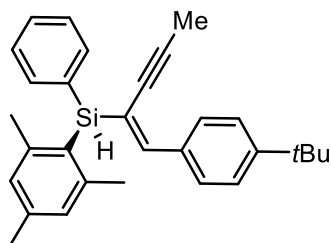

**3f** was synthesized following the general procedure C. White liquid (35.5 mg, 42% yield). purified by column chromatography (Al<sub>2</sub>O<sub>3</sub>, PE/EA= 300:1).  $[\alpha]_{25}^D = 1.06$  (c = 0.29, CHCl<sub>3</sub>) <sup>1</sup>H NMR (400 MHz, CDCl<sub>3</sub>)  $\delta$  7.90 (d, *J* = 8.0 Hz, 2H), 7.65 (d, *J* = 8.0 Hz, 2H), 7.46 - 7.32 (m, 5H), 6.89 (s, 2H), 6.87 (s, 1H), 5.52 (s, 1H), 2.39 (s, 6H), 2.32 (s, 3H), 2.06 (s, 3H), 1.34 (s, 9H); <sup>13</sup>C NMR (100 MHz, CDCl<sub>3</sub>)  $\delta$  151.9, 147.2, 145.9, 140.1, 135.7, 135.1, 134.2, 129.5, 128.9, 128.6, 128.0, 126.7, 125.3, 117.5, 98.6, 80.8, 34.9, 31.4, 24.5, 21.4, 5.4.; IR (KBr, cm<sup>-1</sup>): 3367.2, 2961.2, 2923.4, 2855.6, 2147.3, 1612.4, 1270.3, 1107.6, 1021.3, 794.6, 607.6. HRMS (APCI) *m/z* Calcd for C<sub>30</sub>H<sub>34</sub>Si [M+H]<sup>+</sup> : 423.2530 , found: 423.2462

HPLC: Chiralpak AD-H column (hexanes: isopropanol = 99.7:0.3, 0.8 mL/min, 230 nm, 93% *ee*). *t*R = 11.07 min (major), *t*R = 6.597 min (minor).

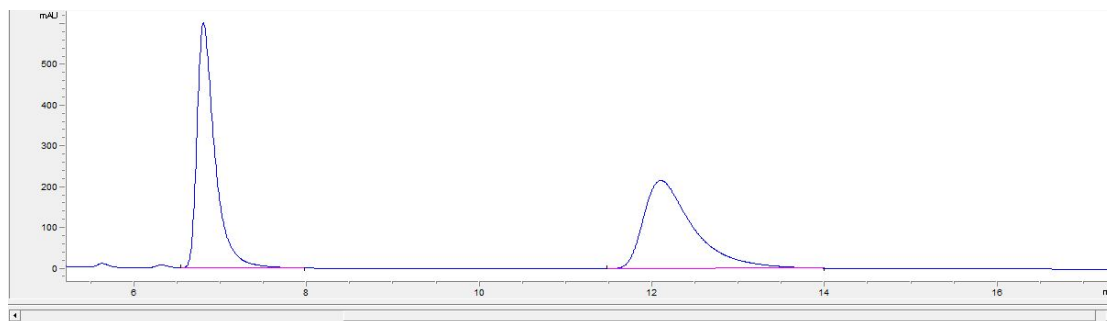

|   | Time/min | Area   | Height | Area%  |
|---|----------|--------|--------|--------|
| 1 | 6.801    | 8715.7 | 602    | 50.127 |
| 2 | 12.099   | 8671.6 | 216.4  | 49.873 |

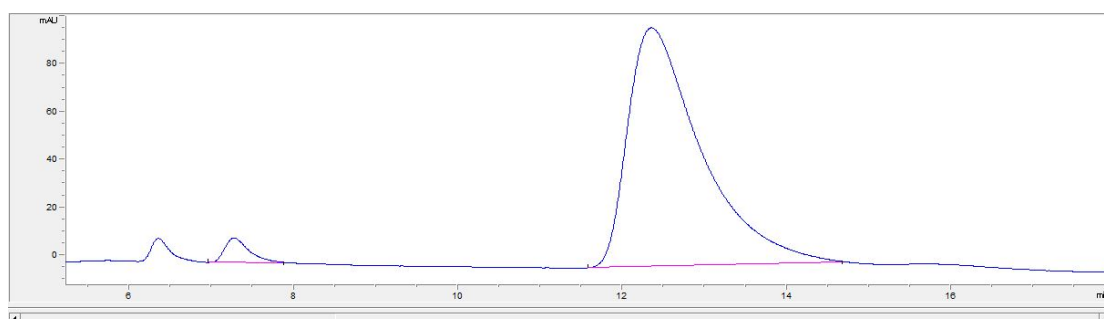

|   | Time/min | Area  | Height | Area%  |
|---|----------|-------|--------|--------|
| 1 | 6.597    | 500.6 | 25.9   | 3.645  |
| 2 | 11.07    | 13234 | 226.8  | 96.355 |

**(*S,E*)-mesityl(1-(4-pentylphenyl)pent-1-en-3-yn-2-yl)(phenyl)silane**

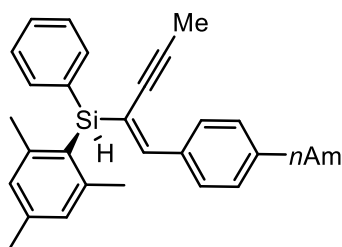

**3g** was synthesized following the general procedure C. Yellow liquid (34.9 mg, 40% yield). purified by column chromatography (Al<sub>2</sub>O<sub>3</sub>, PE/EA= 300:1).  $[\alpha]_{25}^D = 2.68$  (c = 0.40, CHCl<sub>3</sub>). <sup>1</sup>H NMR (400 MHz, CDCl<sub>3</sub>)  $\delta$  7.77 (d, *J* = 8.0 Hz, 2H), 7.55 (d, *J* = 8.0 Hz, 2H), 7.32 - 7.23 (m, 3H), 7.07 (d, *J* = 8.0 Hz, 2H), 6.78 (s, 2H), 6.76 (s, 1H), 5.42 (s, 1H), 2.56 - 2.43 (m, 2H), 2.29 (s, 6H), 2.21 (s, 3H), 1.95 (s, 3H), 1.57 - 1.49 (m, 2H), 1.26 - 1.20 (m, 4H), 0.80 (t, *J* = 6.0 Hz, 3H).; <sup>13</sup>C NMR (100 MHz, CDCl<sub>3</sub>)  $\delta$  147.4, 145.8, 143.9, 140.1, 135.7, 135.4, 134.2, 129.5, 128.9, 128.8, 128.4, 128.0, 126.7, 117.2, 98.6, 80.8, 77.5, 77.2, 76.8, 36.0, 31.6, 31.2, 24.5, 22.7, 21.4, 14.2, 5.4.; <sup>29</sup>Si NMR(500MHz, CDCl<sub>3</sub>)  $\delta$  26.4.; IR (KBr, cm<sup>-1</sup>): 2930.2, 2851.7, 2151.2, 1466.1, 1021.3, 791.7, 742.2, 622.1. HRMS (ESI) *m/z* Calcd for C<sub>31</sub>H<sub>36</sub>Si [M+H]<sup>+</sup> : 437.2659, found: 437.2335

HPLC: Chiralpak AD-H column (hexanes: isopropanol = 99.7:0.3, 0.8 ml/min, 230 nm, 93% *ee*). *t*R = 12.355 min (major), *t*R = 7.273 min (minor).

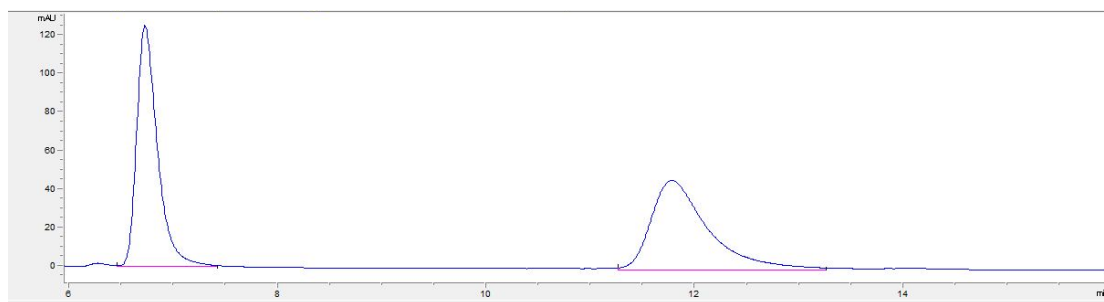

|   | Time/min | Area   | Height | Area%  |
|---|----------|--------|--------|--------|
| 1 | 6.727    | 1738.2 | 125.3  | 49.005 |
| 2 | 11.78    | 1808.7 | 46.8   | 50.995 |

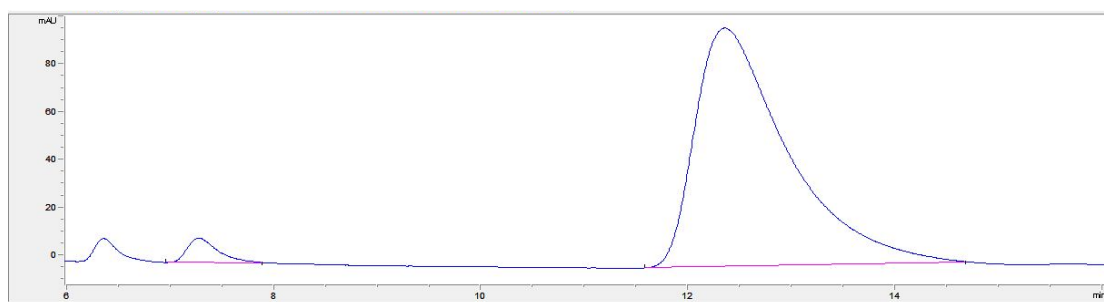

|   | Time/min | Area   | Height | Area%  |
|---|----------|--------|--------|--------|
| 1 | 7.273    | 214.1  | 10.3   | 3.341  |
| 2 | 12.355   | 6195.8 | 99.8   | 96.659 |

**(*S,E*)-(1-([1,1'-biphenyl]-4-yl)pent-1-en-3-yn-2-yl)(mesityl)(phenyl)silane**

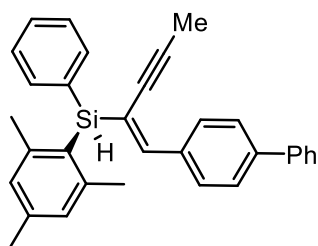

**3h** was synthesized following the general procedure C. Yellow liquid (77.8 mg, 88% yield). purified by column chromatography (Al<sub>2</sub>O<sub>3</sub>, PE/EA= 300:1).  $[\alpha]_{25}^D = 39.9$  (c = 4.47, CHCl<sub>3</sub>). <sup>1</sup>H NMR (400 MHz, CDCl<sub>3</sub>)  $\delta$  8.03 (d, *J* = 8.0 Hz, 2H), 7.67 (d, *J* = 8.0 Hz, 2H), 7.62 (t, *J* = 8.0 Hz, 4H), 7.49 – 7.42 (m, 3H), 7.41 – 7.35 (m, 3H), 6.92 (s,



1H), 6.91 (s, 2H), 5.55 (s, 1H), 2.42 (s, 6H), 2.33 (s, 3H), 2.08 (s, 3H); <sup>13</sup>C NMR (100 MHz, CDCl<sub>3</sub>) δ 146.8, 145.9, 141.3, 140.8, 140.2, 136.8, 135.7, 134.0, 129.6, 129.2, 128.9, 128.9, 128.1, 127.6, 127.2, 127.0, 126.6, 118.9, 99.4, 80.8, 24.6, 21.4, 5.5.; IR (KBr, cm<sup>-1</sup>): 2964.1, 2927.3, 2855.6, 2142.4, 1462.2, 1266.5, 1009.7, 791.7; HRMS (ESI) m/z Calcd for C<sub>32</sub>H<sub>30</sub>Si [M+H]<sup>+</sup> : 443.219, found: 443.2007

HPLC: Chiralpak AD-H column (hexanes: isopropanol = 99.7:0.3, 0.8 mL/min, 230 nm, 98% ee). tR = 20.097min (major), tR = 10.2546 min (minor).

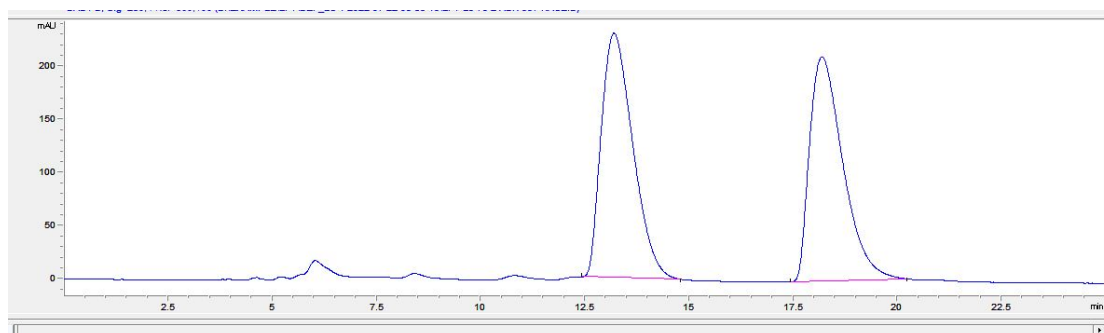

|   | Time/min | Area    | Height | Area%  |
|---|----------|---------|--------|--------|
| 1 | 13.199   | 12108.1 | 229.8  | 50.610 |
| 2 | 18.194   | 11816.1 | 211.4  | 49.390 |

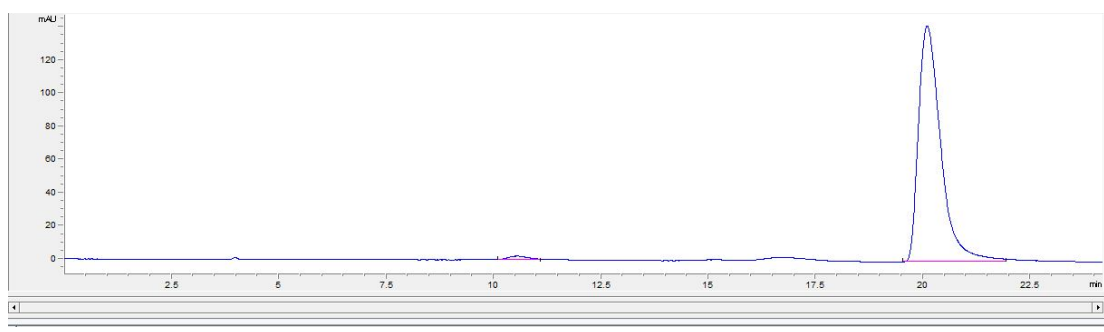

|   | Time/min | Area   | Height | Area%  |
|---|----------|--------|--------|--------|
| 1 | 10.546   | 63     | 2      | 1.220  |
| 2 | 20.097   | 5102.7 | 141.9  | 98.780 |

**(*S,E*)-mesityl(phenyl)(1-(*m*-tolyl)pent-1-en-3-yn-2-yl)silane**

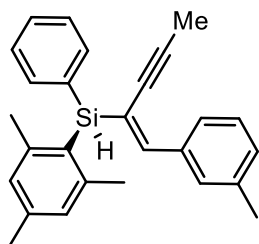

**3i** was synthesized following the general procedure C. Yellow liquid (36.5 mg, 48% yield). purified by column chromatography (Al<sub>2</sub>O<sub>3</sub>, PE/EA= 300:1).  $[\alpha]_{25}^D = 4.01$  (c = 0.48, CHCl<sub>3</sub>). <sup>1</sup>H NMR (400 MHz, CDCl<sub>3</sub>)  $\delta$  7.80 (d, *J* = 8.0 Hz, 1H), 7.69 (s, 1H), 7.64 (d, *J* = 8.0 Hz, 2H), 7.42 – 7.32 (m, 3H), 7.23 (d, *J* = 4.0 Hz, 1H), 7.10 (d, *J* = 8.0 Hz, 1H), 6.88 (s, 2H), 6.85 (s, 1H), 5.52 (s, 1H), 2.38 (s, 6H), 2.34 (s, 3H), 2.30 (s, 3H), 2.04 (s, 3H).; <sup>13</sup>C NMR (100 MHz, CDCl<sub>3</sub>)  $\delta$  147.6, 145.8, 140.1, 137.7, 137.7, 135.7, 134.0, 129.6, 129.5, 128.9, 128.2, 128.0, 126.6, 125.8, 118.4, 98.8, 80.8, 29.9, 24.5, 21.6, 21.4, 5.4.; <sup>29</sup>Si NMR(500MHz, CDCl<sub>3</sub>)  $\delta$  26.4.; IR (KBr, cm<sup>-1</sup>):2927.3, 2850.8, 2151.2, 1612.4, 1266.5, 1025.2, 915.7, 791.7, 723.8, 689.9. HRMS (ESI) m/z Calcd for C<sub>30</sub>H<sub>34</sub>Si [M+H]<sup>+</sup> : 423.2503, found: 423.2692

HPLC: Chiralpak AD-H column (hexanes: isopropanol = 99.7:0.3, 0.8 mL/min, 230 nm, 91% *ee*). tR = 6.063 min (major), tR = 5.299 min (minor).

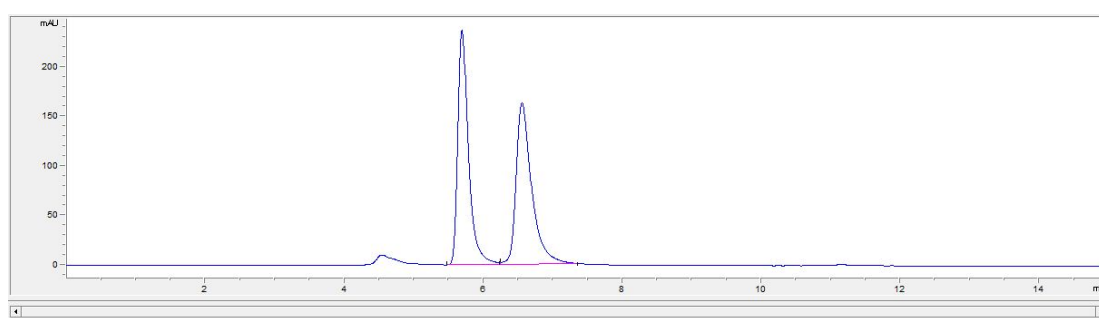

|   | Time/min | Area   | Height | Area%  |
|---|----------|--------|--------|--------|
| 1 | 5.595    | 2527.9 | 236.9  | 49.540 |
| 2 | 6.557    | 2574.9 | 163.3  | 50.460 |

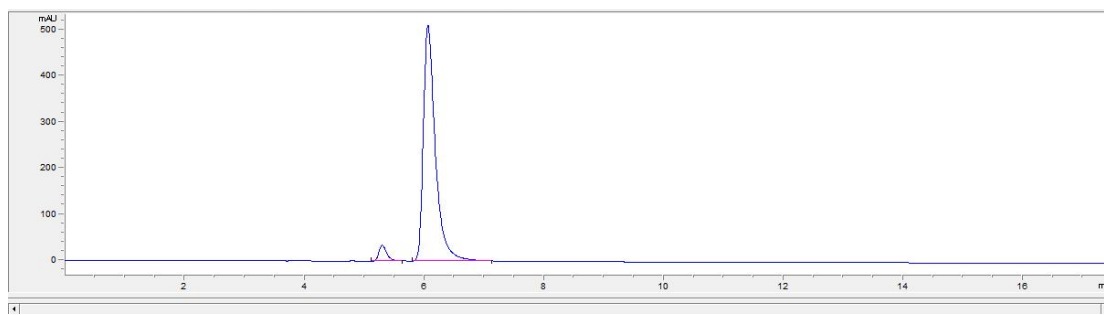

|   | Time/min | Area   | Height | Area%  |
|---|----------|--------|--------|--------|
| 1 | 5.299    | 319.5  | 34.2   | 4.300  |
| 2 | 6.063    | 7110.4 | 510.7  | 95.700 |

**(*S,E*)-mesityl(phenyl)(1-(*o*-tolyl)pent-1-en-3-yn-2-yl)silane**

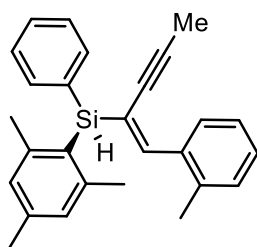

**3j** was synthesized following the general procedure C. Yellow liquid (23.6 mg, 31% yield). purified by column chromatography (Al<sub>2</sub>O<sub>3</sub>, PE/EA= 300:1). [ $\alpha$ ]<sub>25</sub><sup>D</sup> = 39.9 (c = 4.47, CHCl<sub>3</sub>). <sup>1</sup>H NMR (400 MHz, CDCl<sub>3</sub>)  $\delta$  7.69 – 7.60 (m, 2H), 7.43 – 7.31 (m, 3H), 7.31 – 7.23 (m, 1H), 7.19 – 7.12 (m, 2H), 7.12 – 7.05 (m, 1H), 6.86 (s, 2H), 6.41 (m, 1H), 5.49 (s, 1H), 2.38 (s, 6H), 2.29 (s, 3H), 2.23 (s, 3H), 2.10 (d, J = 8.0 Hz, 3H).; <sup>13</sup>C NMR (100 MHz, CDCl<sub>3</sub>)  $\delta$  147.4, 145.8, 143.9, 140.1, 135.7, 135.4, 134.2, 129.5, 128.9, 128.8, 128.4, 128.0, 126.7, 117.2, 98.6, 80.8, 77.5, 77.2, 76.8, 36.0, 31.6, 31.2, 24.5, 22.7, 21.4, 14.2, 5.4.; IR (KBr, cm<sup>-1</sup>): 2964.1, 2859.5, 1253.9, 1077.5, 1006.8, 791.7, 699.6. HRMS (ESI) m/z Calcd for C<sub>27</sub>H<sub>28</sub>Si [M+H]<sup>+</sup> : 423.2503, found: 423.2201  
HPLC: Chiralpak Phenomenex column (hexanes: isopropanol = 99.7:0.3, 0.8 mL/min, 230 nm, 76% ee). tR = 21.053 min (major), tR = 18.638 min (minor).

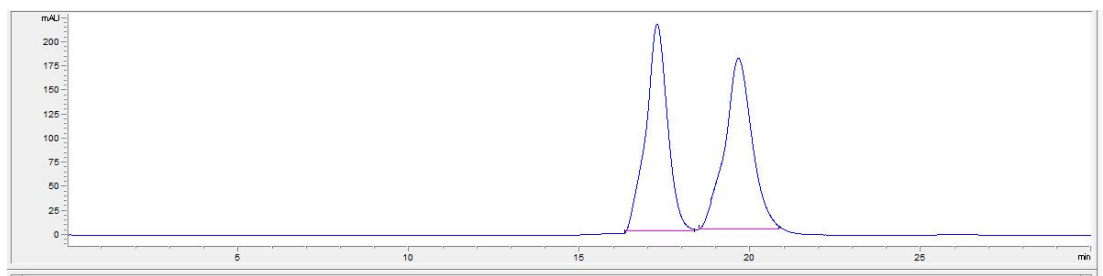

|   | Time/min | Area   | Height | Area%  |
|---|----------|--------|--------|--------|
| 1 | 17.265   | 9454   | 215.7  | 49.135 |
| 2 | 19.656   | 9786.8 | 177.3  | 50.865 |

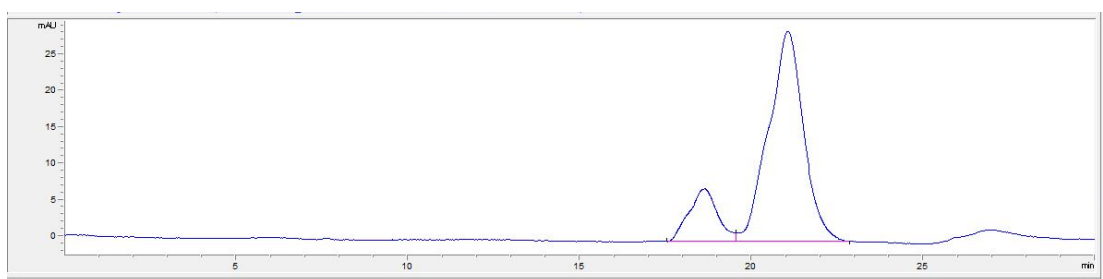

|   | Time/min | Area   | Height | Area%  |
|---|----------|--------|--------|--------|
| 1 | 18.638   | 427.8  | 7.3    | 17.241 |
| 2 | 21.053   | 2053.3 | 2.9    | 82.759 |

**(*S,E*)-(1-(4-chlorophenyl)pent-1-en-3-yn-2-yl)(mesityl)(phenyl)silane**

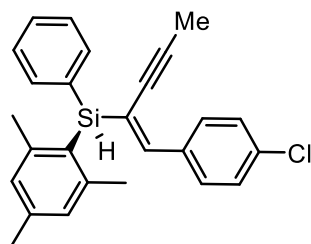

**3k** was synthesized following the general procedure C. Yellow liquid (56.0 mg, 70% yield). purified by column chromatography ( $\text{Al}_2\text{O}_3$ , PE/EA= 300:1).  $[\alpha]_{25}^D = 1.01$  ( $c = 0.27$ ,  $\text{CHCl}_3$ ).  $^1\text{H}$  NMR (400 MHz,  $\text{CDCl}_3$ )  $\delta$  7.88 (d,  $J = 8.0$  Hz, 2H), 7.65 (d,  $J = 8.0$  Hz, 2H), 7.46 – 7.36 (m, 3H), 7.32 (d,  $J = 8.0$  Hz, 2H), 6.90 (s, 2H), 6.83 (s, 1H), 5.53 (s, 1H), 2.40 (s, 6H), 2.33 (s, 3H), 2.06 (s, 3H).;  $^{13}\text{C}$  NMR (100 MHz,  $\text{CDCl}_3$ )  $\delta$  145.8, 145.8, 140.2, 136.2, 135.6, 134.1, 133.7, 130.0, 129.6, 128.9, 128.5, 128.1, 126.4, 119.8,

99.8, 80.4, 24.5, 21.4, 5.4.; IR (KBr,  $\text{cm}^{-1}$ ): 2927.3, 2147.3, 1604.7, 1492.2, 1428.3, 1093.0, 919.6, 791.7, 736.2. HRMS (ESI)  $m/z$  Calcd for  $\text{C}_{30}\text{H}_{34}\text{Si}$   $[\text{M}+\text{Na}]^+$  : 423.1414, found: 423.1448

HPLC: Chiralpak AD-H column (hexanes: isopropanol = 99.7:0.3, 0.8 mL/min, 230 nm, 94% *ee*).  $t_R$  = 8.822 min (major),  $t_R$  = 6.241 min (minor).

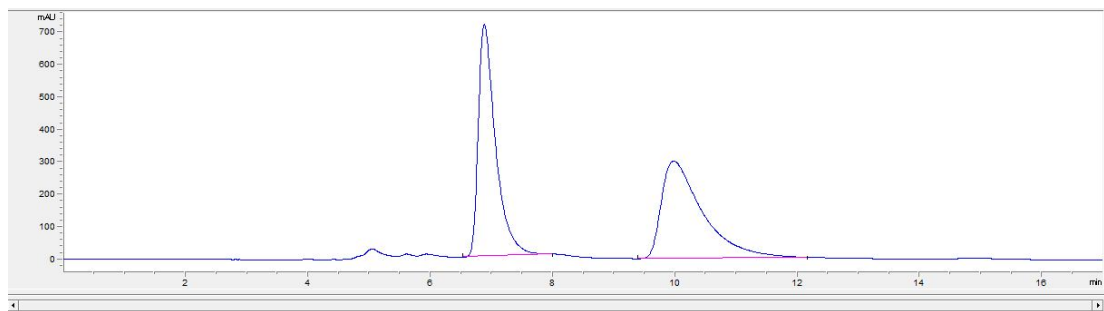

|   | Time/min | Area    | Height | Area%  |
|---|----------|---------|--------|--------|
| 1 | 6.881    | 14063.4 | 716.4  | 50.057 |
| 2 | 9.978    | 14031.6 | 300.2  | 49.943 |

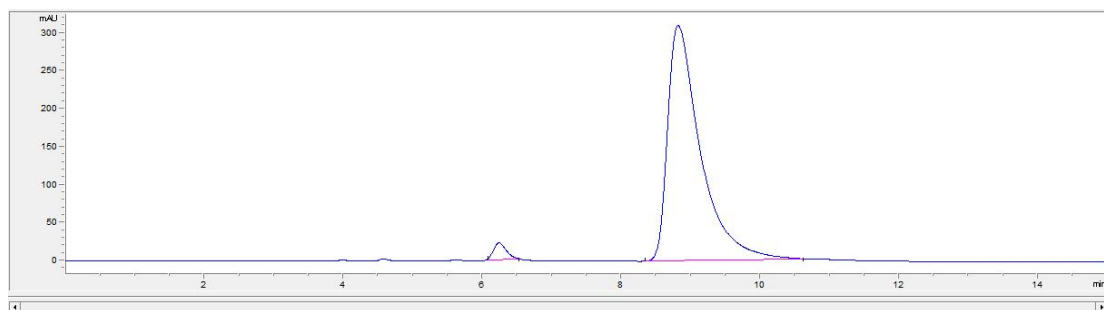

|   | Time/min | Area  | Height | Area%  |
|---|----------|-------|--------|--------|
| 1 | 6.241    | 314.6 | 23.4   | 2.995  |
| 2 | 8.822    | 10190 | 310.5  | 97.005 |

**(*S,E*)-(1-(4-bromophenyl)pent-1-en-3-yn-2-yl)(mesityl)(phenyl)silane**

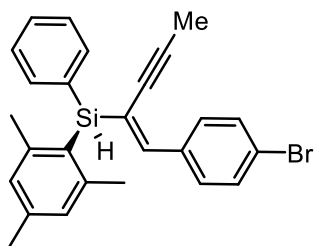

**3I** was synthesized following the general procedure C. Yellow liquid (30.3 mg, 34% yield). purified by column chromatography (Al<sub>2</sub>O<sub>3</sub>, PE/EA= 300:1).  $[\alpha]_{25}^D = 0.88$  (c = 0.37, CHCl<sub>3</sub>). <sup>1</sup>H NMR (400 MHz, CDCl<sub>3</sub>)  $\delta$  7.81 (d, *J* = 8.0 Hz, 2H), 7.65 (d, *J* = 8.0 Hz, 2H), 7.48 (d, *J* = 8.0 Hz, 2H), 7.43 - 7.35 (m, 3H), 6.90 (s, 2H), 6.81 (s, 1H), 5.52 (s, 1H), 2.40 (s, 6H), 2.32 (s, 3H), 2.05 (s, 3H).; <sup>13</sup>C NMR (100 MHz, CDCl<sub>3</sub>)  $\delta$  145.8, 140.2, 136.5, 135.6, 133.7, 131.4, 130.2, 129.6, 128.9, 128.1, 126.3, 122.4, 120.1, 100.0, 80.4, 29.9, 24.5, 21.4, 5.4.; IR (KBr, cm<sup>-1</sup>): 2927.3, 2855.1, 2147.3 1462.2, 1077.5, 1013.6, 791.7, 739.3. HRMS (APCI) *m/z* Calcd for C<sub>26</sub>H<sub>25</sub>BrSi [M+H]<sup>+</sup> : 445.0982, found: 445.2832

HPLC: Chiralpak AD-H column (hexanes: isopropanol = 99.7:0.3, 0.8 mL/min, 230 nm, 95% *ee*). *t*<sub>R</sub> = 9.006 min (major), *t*<sub>R</sub> = 6.324 min (minor).

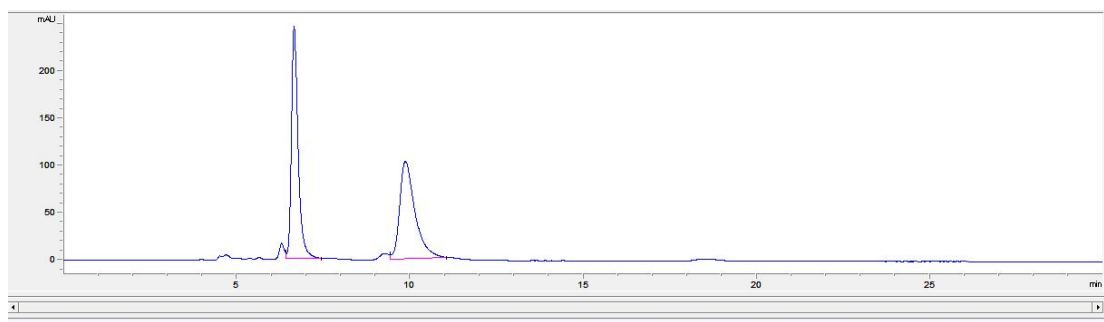

|   | Time/min | Area   | Height | Area%  |
|---|----------|--------|--------|--------|
| 1 | 6.654    | 3289.7 | 246.6  | 50.826 |
| 2 | 9.865    | 3182.8 | 103.3  | 49.174 |

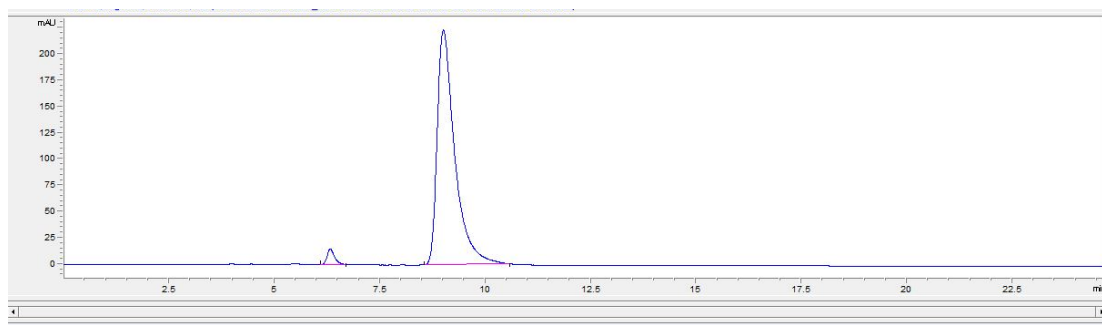

|   | Time/min | Area   | Height | Area%  |
|---|----------|--------|--------|--------|
| 1 | 6.324    | 184.1  | 14.8   | 2.753  |
| 2 | 9.006    | 6503.3 | 223.9  | 97.247 |

**(*S,E*)-(1,4-di(thiophen-3-yl)but-1-en-3-yn-2-yl)(mesityl)(phenyl)silane**

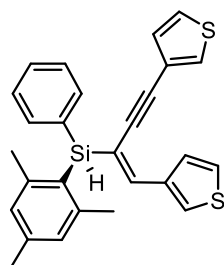

**3m** was synthesized following the general procedure C. Yellow liquid (58.2 mg, 66% yield). purified by column chromatography (Al<sub>2</sub>O<sub>3</sub>, PE/EA= 300:1).  $[\alpha]_{25}^D = -4.72$  (c = 2.03, CHCl<sub>3</sub>). <sup>1</sup>H NMR (400 MHz, CDCl<sub>3</sub>)  $\delta$  7.96 – 7.87 (m, 1H), 7.78 – 7.73 (m, 1H), 7.72 – 7.65 (m, 2H), 7.45 – 7.33 (m, 3H), 7.31 – 7.26 (m, 2H), 7.26 – 7.21 (m, 1H), 7.01 (s, 1H), 7.00 – 6.95 (m, 1H), 6.89 (s, 2H), 5.59 (s, 1H), 2.41 (s, 6H), 2.30 (s, 3H).; <sup>13</sup>C NMR (100 MHz, CDCl<sub>3</sub>)  $\delta$  145.8, 141.6, 140.4, 140.2, 135.7, 133.6, 129.6, 129.6, 128.9, 128.2, 128.2, 128.1, 126.45, 126.4, 125.4, 125.2, 123.1, 115.5, 96.3, 90.8, 24.7, 21.4.; <sup>29</sup>Si NMR(500MHz, CDCl<sub>3</sub>)  $\delta$  26.8.; IR (KBr, cm<sup>-1</sup>): 3102.7, 2921.6, 2851.7, 2147.3, 1428.3, 1104.7, 843.9, 773.3, 735.5. HRMS (ESI m/z Calcd for C<sub>27</sub>H<sub>24</sub>S<sub>2</sub>Si [M+Na]<sup>+</sup> : 463.0981 found: 463.0949

HPLC: Chiralpa AD-H column (hexanes: isopropanol = 99.7:0.3, 0.8 mL/min, 230 nm, 95% ee). tR =22.864 min (major), tR = 17.53 min (minor).

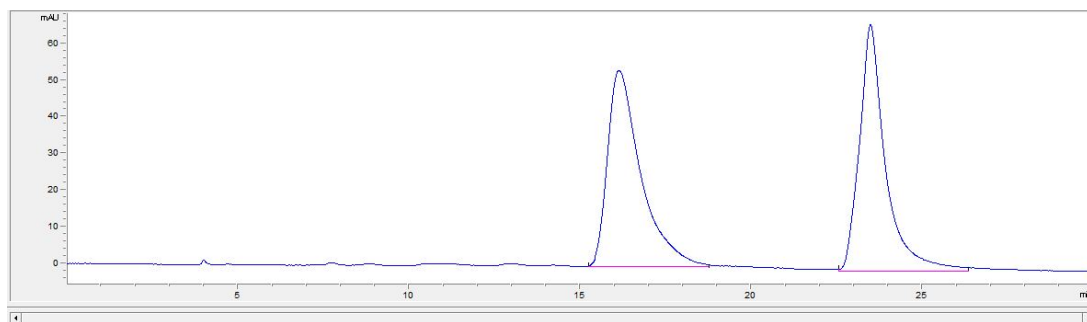

|   | Time/min | Area   | Height | Area%  |
|---|----------|--------|--------|--------|
| 1 | 16.136   | 3659.3 | 53.9   | 50.443 |
| 2 | 23.485   | 3595.1 | 67.5   | 49.557 |

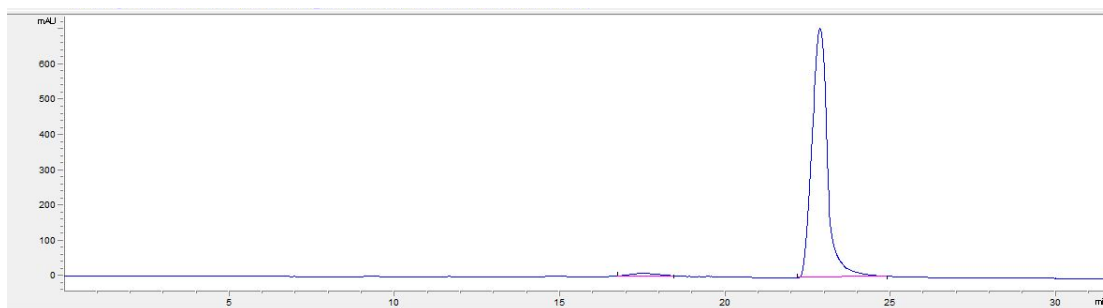

|   | Time/min | Area    | Height | Area%  |
|---|----------|---------|--------|--------|
| 1 | 17.53    | 575.5   | 8.9    | 2.444  |
| 2 | 22.864   | 22970.2 | 706.5  | 97.556 |

**(*S,E*)-(1-(cyclohex-1-en-1-yl)pent-1-en-3-yn-2-yl)(mesityl)(phenyl)silane**

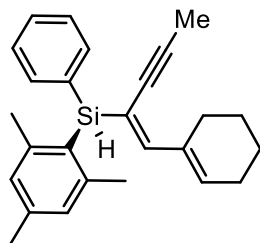

**3n** was synthesized following the general procedure C. Brown liquid (47.4 mg, 64% yield). purified by column chromatography (Al<sub>2</sub>O<sub>3</sub>, PE/EA= 300:1).  $[\alpha]_{25}^D = 1.20$  (c = 0.48, CHCl<sub>3</sub>). <sup>1</sup>H NMR (400 MHz, CDCl<sub>3</sub>)  $\delta$  7.60 (d, *J* = 8.0 Hz, 2H), 7.42 - 7.31 (m,



3H), 6.85 (s, 2H), 6.36 (s, 1H), 5.98 – 5.89 (m, 1H), 5.41 (s, 1H), 2.70 - 2.61 (m, 2H), 2.35 (s, 6H), 2.29 (s, 3H), 1.95 – 1.91 (m, 2H), 1.94 (s, 3H), 1.70 - 1.63 (m, 2H), 1.61 – 1.55 (m, 2H).; <sup>13</sup>C NMR (100 MHz, CDCl<sub>3</sub>) δ 151.6, 145.7, 139.9, 138.7, 135.6, 134.6, 133.6, 129.3, 128.8, 127.9, 127.1, 113.5, 96.4, 81.0, 27.3, 26.3, 24.5, 22.9, 22.1, 21.3, 5.2.; <sup>29</sup>Si NMR(500MHz, CDCl<sub>3</sub>) δ 26.1.; IR (KBr, cm<sup>-1</sup>): 2964.1, 2863.4, 1262.6, 1080.4, 1009.7, 783.9. HRMS (APCI) m/z Calcd for C<sub>26</sub>H<sub>30</sub>Si [M+H]<sup>+</sup> : 371.2190 found: 371.2174

HPLC: Chiralpak AD-H column (hexanes: isopropanol = 99.7:0.3, 0.8 mL/min, 230 nm, 91% *ee*). tR =5.602 min (major), tR = 4.965 min (minor).

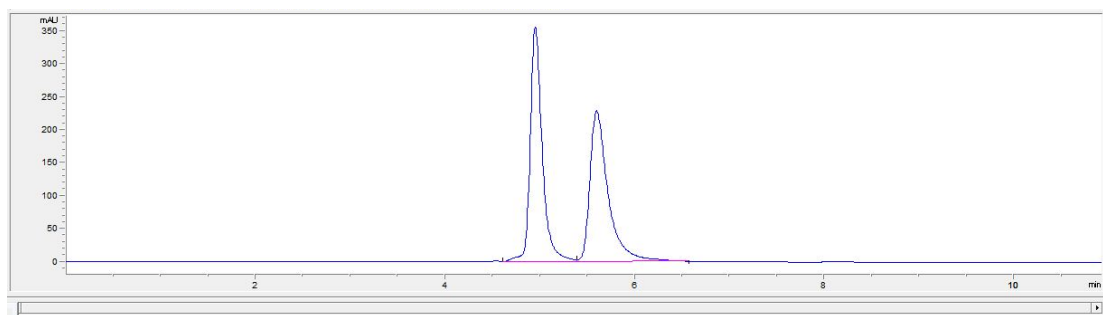

|   | Time/min | Area   | Height | Area%  |
|---|----------|--------|--------|--------|
| 1 | 4.951    | 3162.4 | 356.3  | 50.633 |
| 2 | 5.599    | 3083.4 | 229.2  | 49.367 |

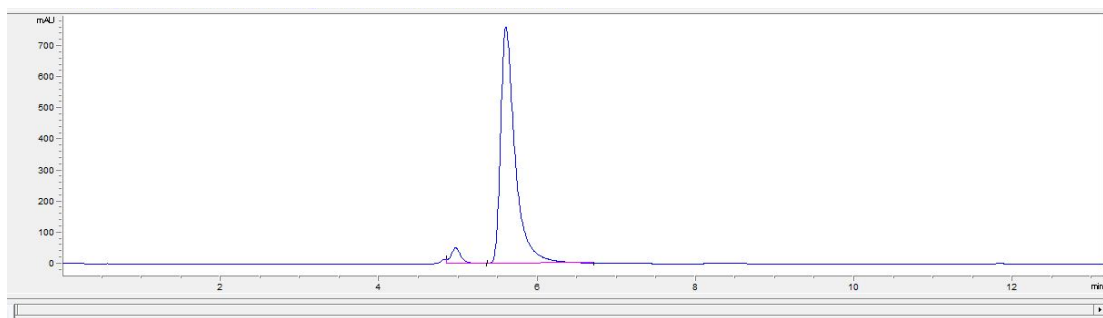

|   | Time/min | Area  | Height | Area%  |
|---|----------|-------|--------|--------|
| 1 | 4.965    | 445.3 | 51     | 4.389  |
| 2 | 5.602    | 760.3 | 760.3  | 95.611 |

**(*S,E*)-mesityl(phenyl)(1-(thiophen-3-yl)pent-1-en-3-yn-2-yl)silane**

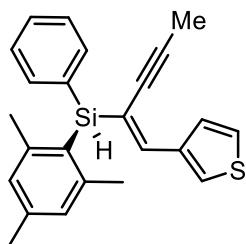

**3o** was synthesized following the general procedure C. White solid (48.4 mg, 65% yield). purified by column chromatography (Al<sub>2</sub>O<sub>3</sub>, PE/EA= 300:1). [ $\alpha$ ]<sub>25</sub><sup>D</sup> = 5.52 (c = 0.56, CHCl<sub>3</sub>). <sup>1</sup>H NMR (400 MHz, CDCl<sub>3</sub>)  $\delta$  7.88 (d, *J* = 4.0 Hz, 1H), 7.66 (d, *J* = 8.0 Hz, 1H), 7.63 (dd, *J* = 8.0, 4.0Hz, 2H), 7.41 – 7.31 (m, 3H), 7.27 – 7.22 (m, 1H), 6.88 (s, 1H), 6.87 (s, 2H), 5.49 (s, 1H), 2.36 (s, 6H), 2.29 (s, 3H), 2.05 (s, 3H).; <sup>13</sup>C NMR (100 MHz, CDCl<sub>3</sub>)  $\delta$  151.6, 145.7, 139.9, 138.7, 135.6, 134.6, 133.6, 129.3, 128.8, 127.9, 127.1, 113.5, 96.4, 81.0, 27.3, 26.3, 24.5, 22.9, 22.1, 21.3, 5.2.; IR (KBr, cm<sup>-1</sup>): 2927.3, 2859.5, 2147.3, 1428.3, 1021.3, 847.9, 791.7, 739.3. HRMS (APCI) *m/z* Calcd for C<sub>24</sub>H<sub>24</sub>SSi [M+H]<sup>+</sup> : 373.1441 found: 373.1439

HPLC: Chiralpak AD-H column (hexanes: isopropanol = 99.7:0.3, 0.8 mL/min, 230 nm, 95% *ee*). t<sub>R</sub> = 5.602 min (major), t<sub>R</sub> = 4.965 min (minor).

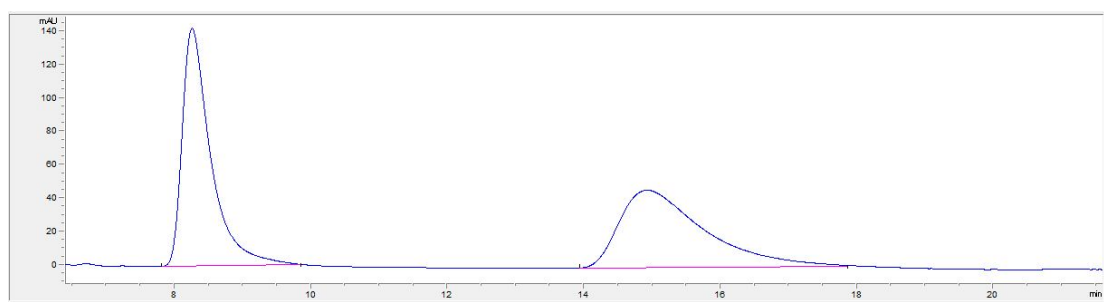

|   | Time/min | Area   | Height | Area%  |
|---|----------|--------|--------|--------|
| 1 | 8.26     | 4185.3 | 142.5  | 50.769 |
| 2 | 14.926   | 4085.5 | 46.6   | 49.231 |

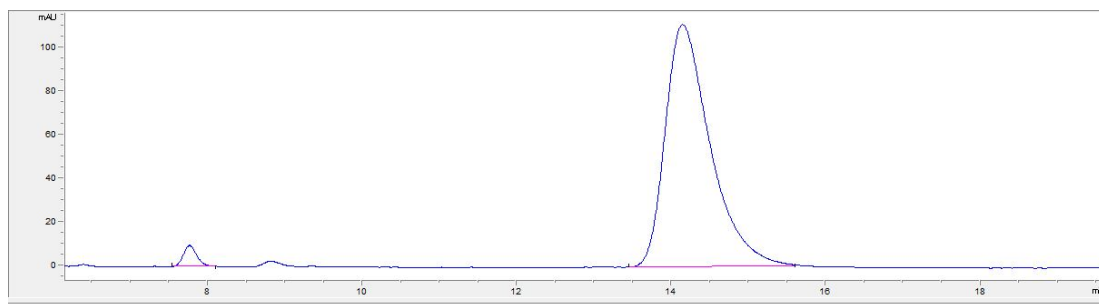

|   | Time/min | Area   | Height | Area%  |
|---|----------|--------|--------|--------|
| 1 | 7.767    | 119.6  | 9.8    | 2.589  |
| 2 | 14.148   | 4500.4 | 111.1  | 97.411 |

**(*S,E*)-(1,4-dicyclopropylbut-1-en-3-yn-2-yl)(mesityl)(phenyl)silane**

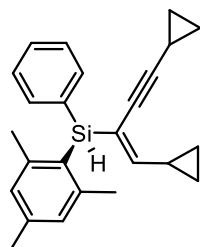

**3p** was synthesized following the general procedure C. Yellow liquid (37.1 mg, 52% yield). purified by column chromatography (Al<sub>2</sub>O<sub>3</sub>, PE/EA= 300:1).  $[\alpha]_{25}^D = 6.47$  (c = 1.65, CHCl<sub>3</sub>). <sup>1</sup>H NMR (400 MHz, CDCl<sub>3</sub>)  $\delta$  7.60 (d, *J* = 4.0 Hz, 2H), 7.40 – 7.29 (m, 3H), 6.85 (s, 2H), 5.51 (d, *J* = 8.0 Hz, 1H), 5.38 (s, 1H), 2.35 (s, 6H), 2.30 (s, 3H), 2.25 – 2.14 (m, 1H), 1.40 – 1.33 (m, 1H), 0.95 – 0.86 (m, 2H), 0.79 – 0.71 (m, 2H), 0.61 – 0.55 (m, 2H), 0.52 – 0.46 (m, 2H); <sup>13</sup>C NMR (100 MHz, CDCl<sub>3</sub>)  $\delta$  158.9, 145.7, 139.9, 135.5, 134.4, 129.3, 128.7, 127.9, 127.0, 115.0, 101.3, 75.5, 24.5, 21.3, 15.6, 8.9, 8.25, 0.8.; IR (KBr, cm<sup>-1</sup>): 3013.6, 2919.6, 2151.2, 1604.7, 1428.3, 1104.7, 905.0, 855.6, 735.5, 705.4. HRMS (ESI *m/z* Calcd for C<sub>25</sub>H<sub>28</sub>Si [M+H]<sup>+</sup> : 357.2034 found: 357.2100 HPLC: Chiralpa AD-H column (hexanes: isopropanol = 99.7:0.3, 0.8 mL/min, 230 nm, 96% *ee*). *t*<sub>R</sub> = 4.98 min (major), *t*<sub>R</sub> = 4.747 min (minor)

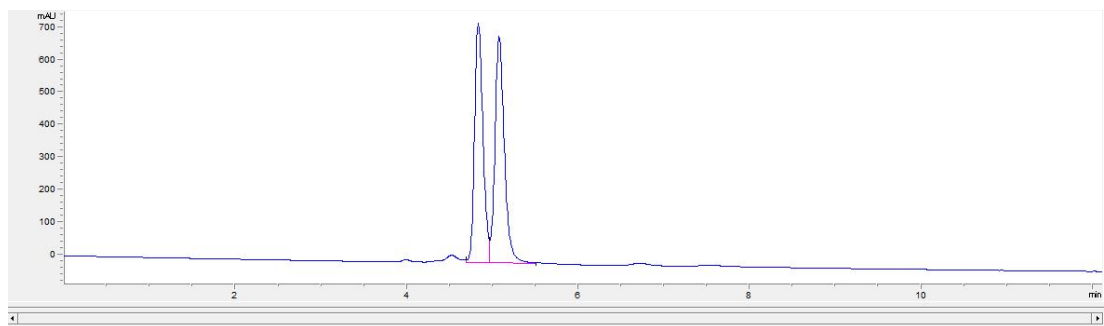

|   | Time/min | Area   | Height | Area%  |
|---|----------|--------|--------|--------|
| 1 | 4.833    | 5049.3 | 738.3  | 48.530 |
| 2 | 5.076    | 5355.3 | 697.3  | 51.470 |

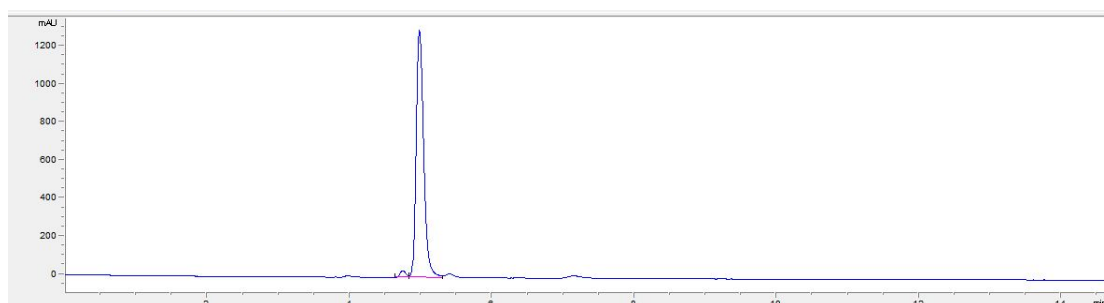

|   | Time/min | Area   | Height | Area%  |
|---|----------|--------|--------|--------|
| 1 | 4.747    | 214.2  | 35.9   | 2.176  |
| 2 | 4.98     | 9630.4 | 1299.3 | 97.824 |

**(*S,E*)-(1,4-diphenylbut-1-en-3-yn-2-yl)(mesityl)(phenyl)silane**

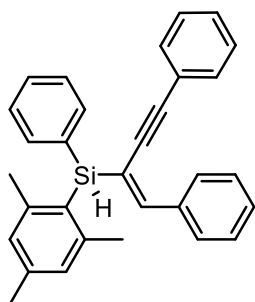

**3q** was synthesized following the general procedure C. White liquid (51.4 mg, 60% yield). purified by column chromatography (Al<sub>2</sub>O<sub>3</sub>, PE/EA= 300:1).  $[\alpha]_{25}^D = -4.69$  (c = 0.90, CHCl<sub>3</sub>). <sup>1</sup>H NMR (400 MHz, CDCl<sub>3</sub>)  $\delta$  8.05 (d, *J* = 8.0 Hz, 2H), 7.75 (d, *J* = 8.0 Hz, 2H), 7.47 – 7.39 (m, 1H), 7.39 – 7.34 (m, 5H), 7.34 – 7.30 (m, 5H), 7.08 (s, 1H),

6.94 (s, 2H), 5.68 (s, 1H), 2.49 (s, 6H), 2.35 (s, 3H); <sup>13</sup>C NMR (100 MHz, CDCl<sub>3</sub>) δ 148.2, 145.9, 140.3, 137.7, 135.7, 133.6, 131.5, 129.7, 129.2, 129.0, 128.9, 128.4, 128.4, 128.2, 128.1, 126.5, 124.1, 117.7, 101.5, 90.8, 24.7, 21.4.; IR (KBr, cm<sup>-1</sup>): 3055.2, 2923.4, 2851.7, 2147.3, 1608.5, 1438.9, 843.0, 735.5, 693.8. HRMS (APCI) m/z Calcd for C<sub>31</sub>H<sub>28</sub>Si [M+H]<sup>+</sup> : 429.2034 found: 429.2008

HPLC: Chiralpak AD-H column (hexanes: isopropanol = 99.7:0.3, 0.8 mL/min, 210 nm, 93% ee). tR =10.557 min (major), tR = 8.332 min (minor).

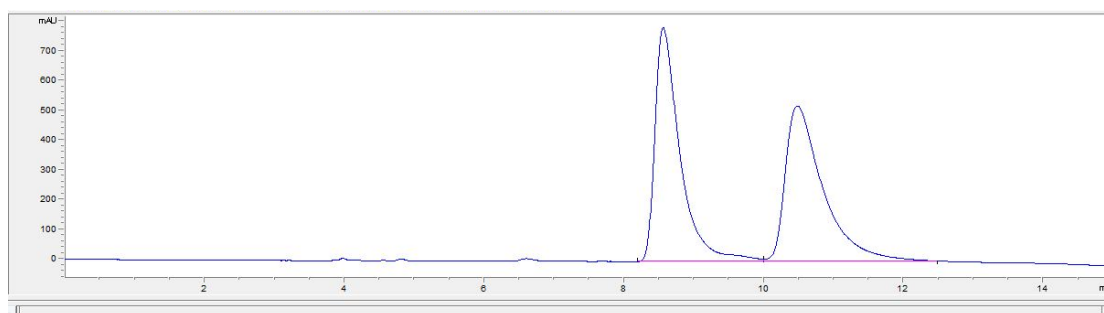

|   | Time/min | Area    | Height | Area%  |
|---|----------|---------|--------|--------|
| 1 | 8.564    | 19698.9 | 787.3  | 49.852 |
| 2 | 10.484   | 19815.9 | 523.3  | 50.148 |

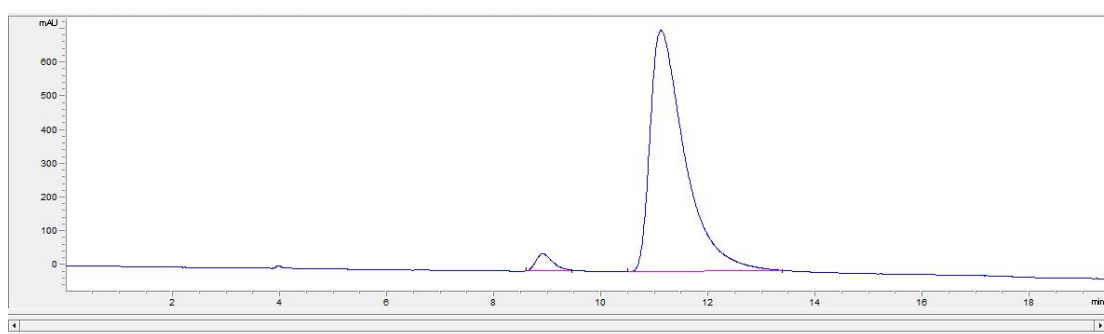

|   | Time/min | Area    | Height | Area%  |
|---|----------|---------|--------|--------|
| 1 | 8.332    | 889     | 52     | 3.523  |
| 2 | 10.557   | 24346.2 | 686.8  | 96.477 |

**(S,E)-(1,4-di-p-tolylbut-1-en-3-yn-2-yl)(mesityl)(phenyl)silane**

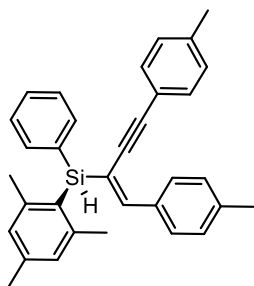

**3r** was synthesized following the general procedure C. Yellow liquid (70.3 mg, 77% yield). purified by column chromatography (Al<sub>2</sub>O<sub>3</sub>, PE/EA= 300:1).  $[\alpha]_{25}^D = -7.63$  (c = 0.80, CHCl<sub>3</sub>). <sup>1</sup>H NMR (400 MHz, CDCl<sub>3</sub>)  $\delta$  7.91 (d, *J* = 8.0 Hz, 2H), 7.70 (d, *J* = 8.0 Hz, 2H), 7.39 – 7.31 (m, 3H), 7.20 – 7.13 (m, 4H), 7.05 (d, *J* = 8.0 Hz, 2H), 6.97 (s, 1H), 6.87 (s, 2H), 5.62 (s, 1H), 2.42 (s, 6H), 2.34 (s, 3H), 2.29 (d, *J* = 8.0 Hz, 6H).; <sup>13</sup>C NMR (100 MHz, CDCl<sub>3</sub>)  $\delta$  147.8, 145.8, 140.1, 139.1, 138.2, 135.7, 135.2, 133.8, 131.3, 129.6, 129.1, 129.1, 128.9, 128.1, 126.7, 121.2, 116.3, 101.5, 90.5, 77.5, 21.6, 21.6, 21.4.; <sup>29</sup>Si NMR(500MHz, CDCl<sub>3</sub>)  $\delta$  26.5.; IR (KBr, cm<sup>-1</sup>): 3029.1, 2930.2, 2855.6, 2143.4, 1608.5, 1111.4, 841.1, 817.6, 733.1, 700.4. HRMS (APCI) *m/z* Calcd for C<sub>33</sub>H<sub>32</sub>Si [M+H]<sup>+</sup> : 457.2347 found: 457.2337

HPLC: Chiralpak AD-H column (hexanes: isopropanol = 99.7:0.3, 0.8 mL/min, 230 nm, 93% *ee*). tR =16.459min (major), tR = 11.802 min (minor).

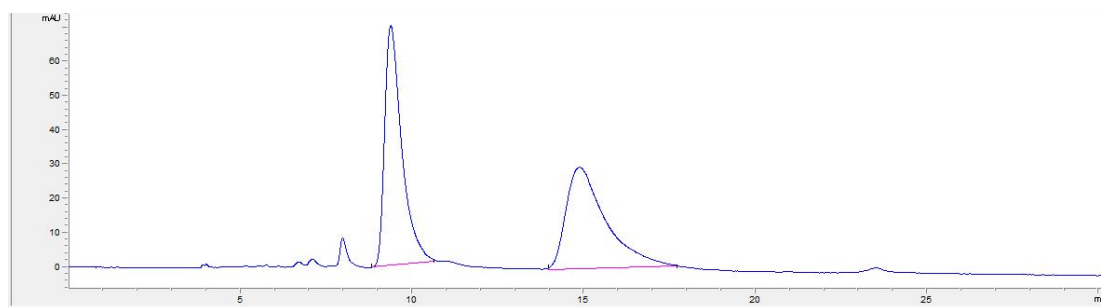

|   | Time/min | Area   | Height | Area%  |
|---|----------|--------|--------|--------|
| 1 | 9.379    | 2407.6 | 70.1   | 50.027 |
| 2 | 14.853   | 2405   | 29.7   | 49.973 |

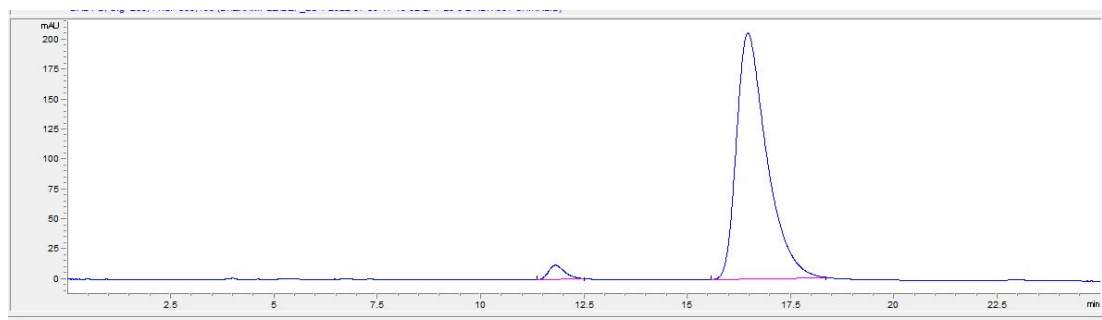

|   | Time/min | Area    | Height | Area%  |
|---|----------|---------|--------|--------|
| 1 | 11.802   | 333.7   | 12     | 3.083  |
| 2 | 16.459   | 10491.5 | 205.6  | 95.917 |

**(*S,E*)-(1,4-di-*m*-tolylbut-1-en-3-yn-2-yl)(mesityl)(phenyl)silane**

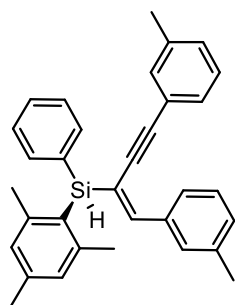

**3s** was synthesized following the general procedure C. White liquid (83.1mg, 91% yield). purified by column chromatography (Al<sub>2</sub>O<sub>3</sub>, PE/EA= 300:1).  $[\alpha]_{25}^D = -1.54$  (c = 0.78, CHCl<sub>3</sub>). <sup>1</sup>H NMR (400 MHz, CDCl<sub>3</sub>)  $\delta$  7.89 (s, 1H), 7.78 (d, J = 8.0 Hz, 1H), 7.74 – 7.66 (m, 2H), 7.45 – 7.32 (m, 3H), 7.27 (t, J = 8.0 Hz, 1H), 7.15 (m, 5H), 6.98 (s, 1H), 6.89 (s, 2H), 5.62 (s, 1H), 2.43 (s, 6H), 2.37 (s, 3H), 2.30 (s, 3H), 2.28 (s, 3H).; <sup>13</sup>C NMR (100 MHz, CDCl<sub>3</sub>)  $\delta$  148.2, 145.8, 140.2, 138.0, 137.8, 137.7, 135.8, 133.7, 132.1, 129.8, 129.8, 129.6, 129.1, 128.9, 128.5, 128.3, 128.3, 128.1, 126.6, 126.4, 124.0, 117.4, 101.8, 90.7, 29.9, 24.7, 21.6, 21.4.; IR (KBr, cm<sup>-1</sup>): 2928.3, 2859.5, 2249.0, 2151.2, 1599.8, 1454.4, 905.0, 787.8, 731.6, 697.7. HRMS (APCI) m/z Calcd for C<sub>33</sub>H<sub>32</sub>Si [M+H]<sup>+</sup> : 457.2346 found: 457.2391

HPLC: Chiralpak AD-H column (hexanes: isopropanol = 99.7:0.3, 0.8 mL/min, 230 nm, 91% *ee*). tR = 7.711 min (major), tR = 6.966 min (minor).

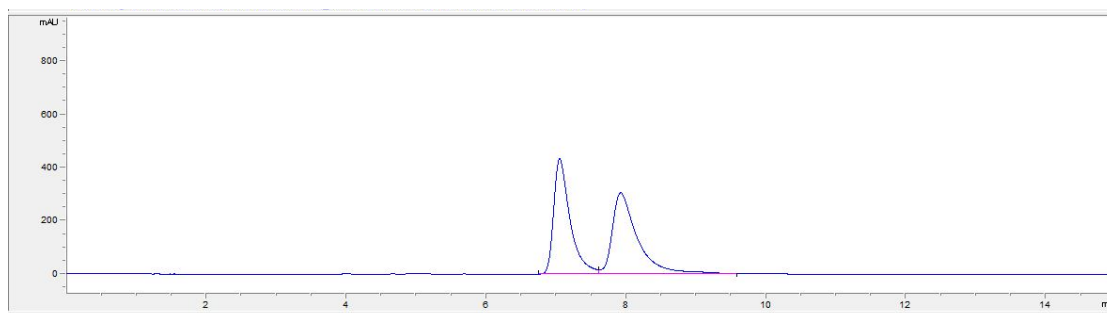

|   | Time/min | Area   | Height | Area%  |
|---|----------|--------|--------|--------|
| 1 | 7.049    | 7189.4 | 434.7  | 48.433 |
| 2 | 7.922    | 7654.7 | 305.4  | 51.567 |

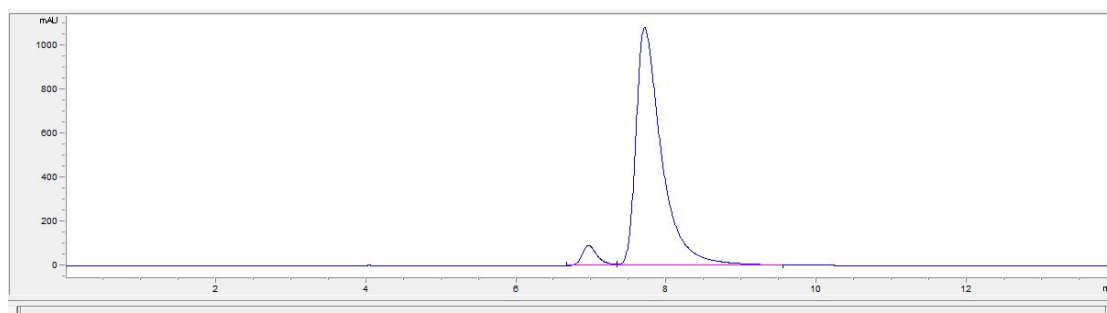

|   | Time/min | Area    | Height | Area%  |
|---|----------|---------|--------|--------|
| 1 | 6.966    | 1312.9  | 92.4   | 4.858  |
| 2 | 7.711    | 25709.6 | 1082.9 | 95.142 |

**(*S,E*)-(1,4-bis(4-ethylphenyl)but-1-en-3-yn-2-yl)(mesityl)(phenyl)silane**

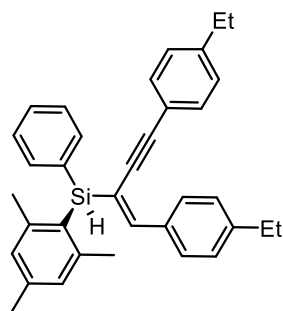

**3t** was synthesized following the general procedure C. White liquid (77.6mg, 80% yield). purified by column chromatography ( $Al_2O_3$ , PE/EA= 300:1).  $[\alpha]_{25}^D = -0.95$  (c = 2.46,  $CHCl_3$ ).  $^1H$  NMR (400 MHz,  $CDCl_3$ )  $\delta$  7.94 (d,  $J = 8.0$  Hz, 2H), 7.70 (d,  $J = 8.0$  Hz, 2H), 7.35 (m, 3H), 7.19 (d,  $J = 8.0$ Hz, 4H), 7.11 – 7.06 (m, 2H), 6.99 (s, 1H), 6.87



(s, 2H), 5.63 (s, 1H), 2.61 (dq,  $J = 12.0, 8.0$  Hz, 4H), 2.43 (s, 6H), 2.28 (s, 3H), 1.24 – 1.14 (m, 6H).;  $^{13}\text{C}$  NMR (100 MHz,  $\text{CDCl}_3$ )  $\delta$  147.8, 145.8, 145.4, 144.5, 140.1, 135.7, 135.5, 133.8, 131.4, 129.6, 129.2, 128.9, 128.1, 128.0, 127.9, 126.7, 121.5, 116.3, 101.6, 90.5, 29.0, 24.7, 21.4, 15.6, 15.5.; IR (KBr,  $\text{cm}^{-1}$ ): 3065.9, 2964.1, 2155.0, 1604.7, 1424.4, 1115.3, 907.9, 829.5, 7316, 697.7. HRMS (ESI)  $m/z$  Calcd for  $\text{C}_{35}\text{H}_{30}\text{Si}$   $[\text{M}+\text{Na}]^+$  : 501.2009 found: 501.2088

HPLC: Chiralpak AD-H column (hexanes: isopropanol = 99.7:0.3, 0.8 mL/min, 230 nm, 93% *ee*).  $t_R = 19.242$  min (major),  $t_R = 13.674$  min (minor).

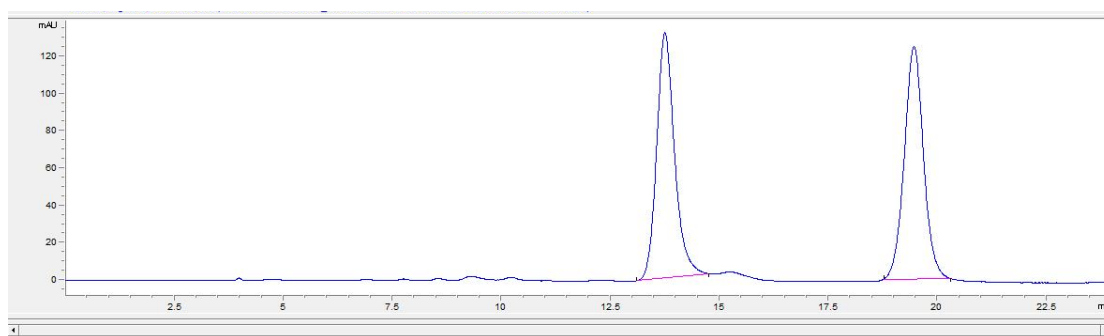

|   | Time/min | Area   | Height | Area%  |
|---|----------|--------|--------|--------|
| 1 | 13.751   | 3764.1 | 131.7  | 49.341 |
| 2 | 19.463   | 3864.8 | 125.3  | 50.659 |

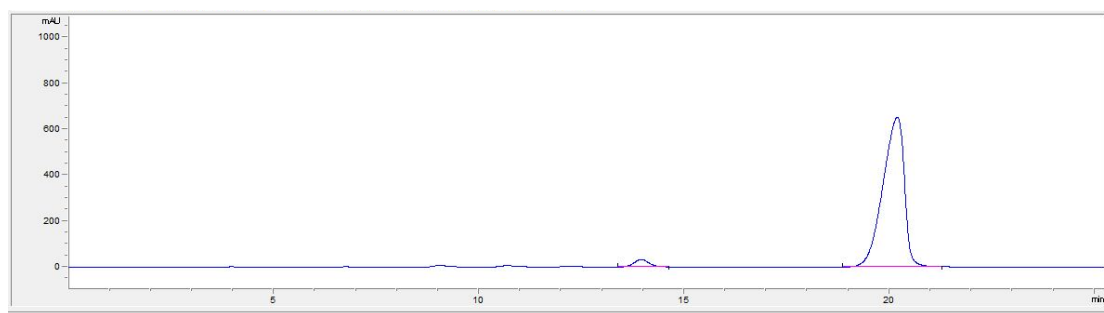

|   | Time/min | Area   | Height | Area%  |
|---|----------|--------|--------|--------|
| 1 | 13.674   | 217.6  | 8.2    | 3.368  |
| 2 | 19.242   | 6241.9 | 196.8  | 96.632 |

**(*S,E*)-(1,4-bis(4-isopropylphenyl)but-1-en-3-yn-2-yl)(mesityl)(phenyl)silane**

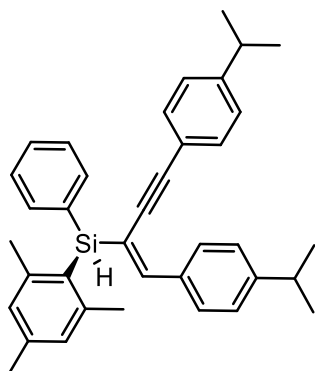

**3u** was synthesized following the general procedure C. White liquid (71.8 mg, 80% yield). purified by column chromatography ( $\text{Al}_2\text{O}_3$ , PE/EA= 300:1).  $[\alpha]_{25}^D = -5.99$  ( $c = 2.99$ ,  $\text{CHCl}_3$ ).  $^1\text{H NMR}$  (400 MHz,  $\text{CDCl}_3$ )  $\delta$  7.96 (d,  $J = 8.0$  Hz, 2H), 7.70 (d,  $J = 8.0$  Hz, 2H), 7.41 – 7.32 (m, 3H), 7.25 – 7.18 (m, 4H), 7.16 – 7.11 (m, 2H), 6.98 (s, 1H), 6.88 (s, 2H), 5.61 (s, 1H), 2.98 – 2.78 (m, 2H), 2.42 (s, 6H), 2.29 (s, 3H), 1.23 (dd,  $J = 12.0, 8.0$  Hz, 12H).;  $^{13}\text{C NMR}$  (100 MHz,  $\text{CDCl}_3$ )  $\delta$  150.0, 149.1, 147.8, 145.8, 140.1, 135.7, 135.6, 133.9, 131.5, 129.6, 129.3, 128.9, 128.1, 126.7, 126.5, 126.5, 121.7, 116.4, 101.6, 90.4, 34.2, 24.7, 24.0, 23.9, 21.4.; IR (KBr,  $\text{cm}^{-1}$ ): 2961.2, 2923.4, 2151.2, 1604.6, 1462.2, 911.8, 829.5, 731.6. HRMS (ESI)  $m/z$  Calcd for  $\text{C}_{37}\text{H}_{40}\text{Si}$   $[\text{M}+\text{H}]^+$  : 513.2972 found: 513.2903

HPLC: Chiralpak AD-H column (hexanes: isopropanol = 99.7:0.3, 0.8 mL/min, 254 nm, 91% *ee*).  $t_R = 12.987$  min (major),  $t_R = 9.717$  min (minor).

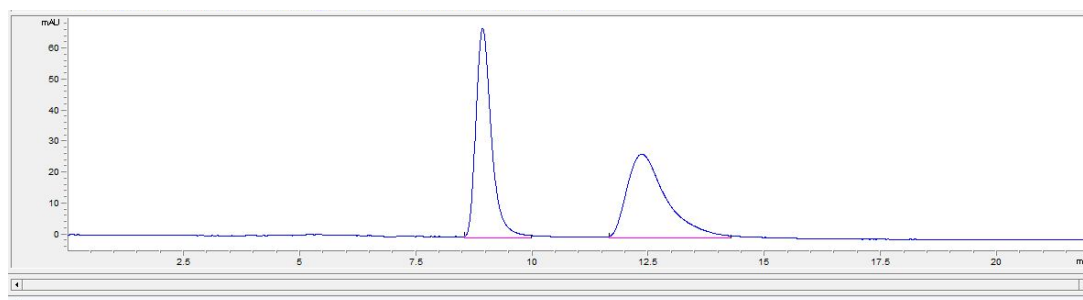

|   | Time/min | Area   | Height | Area%  |
|---|----------|--------|--------|--------|
| 1 | 8.931    | 1610.6 | 68     | 49.991 |
| 2 | 12.352   | 1611.2 | 27.2   | 50.009 |

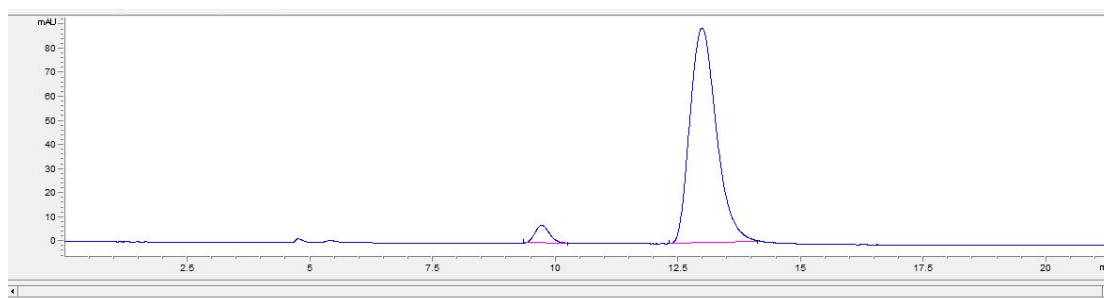

|   | Time/min | Area   | Height | Area%  |
|---|----------|--------|--------|--------|
| 1 | 9.717    | 154.9  | 7.5    | 4.405  |
| 2 | 12.987   | 3361.4 | 89.3   | 95.595 |

**(*S,E*)-(1,4-bis(4-pentylphenyl)but-1-en-3-yn-2-yl)(mesityl)(phenyl)silane**

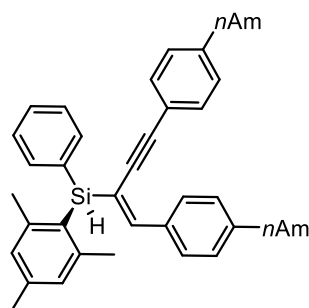

**3v** was synthesized following the general procedure C. White liquid (77.4 mg, 68% yield). purified by column chromatography (Al<sub>2</sub>O<sub>3</sub>, PE/EA= 300:1).  $[\alpha]_D^{25} = -6.35$  (c = 2.43, CHCl<sub>3</sub>). <sup>1</sup>H NMR (400 MHz, CDCl<sub>3</sub>)  $\delta$  7.94 (d, *J* = 8.0 Hz, 2H), 7.70 (d, *J* = 8.0, 1.5 Hz, 2H), 7.40 – 7.32 (m, 3H), 7.18 (d, *J* = 8.0 Hz, 4H), 7.08 (d, *J* = 8.0 Hz, 2H), 6.97 (s, 1H), 6.88 (s, 2H), 5.61 (s, 1H), 2.66 – 2.50 (m, 4H), 2.42 (s, 6H), 2.29 (s, 3H), 1.67 – 1.53 (m, 4H), 1.35 – 1.24 (m, 8H), 0.88 (d, *J* = 8.0 Hz, 6H).; <sup>13</sup>C NMR (100 MHz, CDCl<sub>3</sub>)  $\delta$  147.8, 145.9, 144.2, 143.3, 140.1, 135.7, 135.5, 133.89, 131.4, 129.6, 129.2, 128.9, 128.5, 128.5, 128.1, 126.7, 121.5, 116.3, 101.6, 36.0, 31.6, 31.6, 31.2, 31.1, 24.7, 22.7 21.4, 14.2.; <sup>29</sup>Si NMR(500MHz, CDCl<sub>3</sub>)  $\delta$  26.4.; IR (KBr, cm<sup>-1</sup>): 3025.2, 2930.2, 2143.4, 1424.4, 1102.7, 847.9, 795.5, 729.7, 693.8. HRMS (APCI) *m/z* Calcd for C<sub>41</sub>H<sub>48</sub>Si [M+H]<sup>+</sup> : 569.3599 found: 569.3589

HPLC: Chiralpak AD-H column (hexanes: isopropanol = 99.7:0.3, 0.8 mL/min, 254 nm, 94% *ee*). tR =14.875 min (major), tR = 9.52 min (minor).

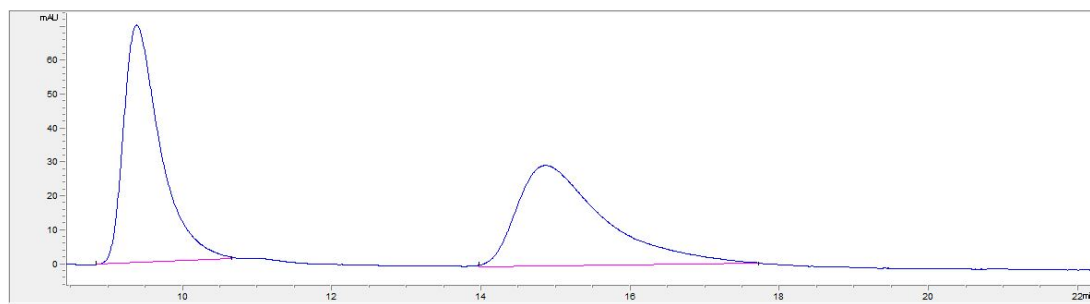

|   | Time/min | Area   | Height | Area%  |
|---|----------|--------|--------|--------|
| 1 | 9.379    | 2407.6 | 70.1   | 50.027 |
| 2 | 14.853   | 2405   | 29.7   | 49.973 |

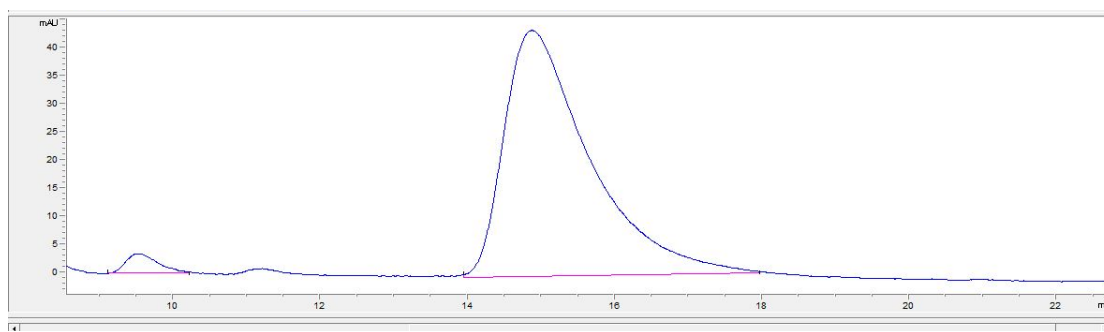

|   | Time/min | Area   | Height | Area%  |
|---|----------|--------|--------|--------|
| 1 | 9.52     | 107    | 3.5    | 2.940  |
| 2 | 14.875   | 3531.5 | 43.8   | 97.060 |

**(*S,E*)-(1,4-bis(4-(trifluoromethyl)phenyl)but-1-en-3-yn-2-yl)(mesityl)(phenyl)silane**

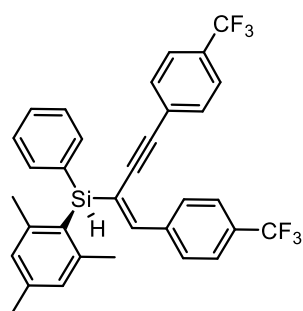

**3w** was synthesized following the general procedure C. Yellow liquid (50.8 mg, 45% yield). purified by column chromatography (Al<sub>2</sub>O<sub>3</sub>, PE/EA= 300:1).  $[\alpha]_{25}^D = 7.42$  (c = 2.57, CHCl<sub>3</sub>). <sup>1</sup>H NMR (400 MHz, CDCl<sub>3</sub>)  $\delta$  8.08 (d, *J* = 8.0 Hz, 2H), 7.72 (d, *J* = 8.0 Hz, 2H), 7.67 (d, *J* = 8.0 Hz, 2H), 7.56 (d, *J* = 8.0 Hz, 2H), 7.50 – 7.40 (m, 3H), 7.33

(d,  $J = 8.0$  Hz, 2H), 7.12 (s, 1H), 6.95 (s, 2H), 5.68 (s, 1H), 2.47 (s, 6H), 2.35 (s, 3H);  
 $^{13}\text{C}$  NMR (100 MHz,  $\text{CDCl}_3$ )  $\delta$  147.3, 145.82, 140.7, 140.5, 135.8, 132.8, 131.7,  
 130.8, 130.0, 129.9(q,  $J = 28.0$  Hz), 129.9, 129.2, 129.1, 128.3, 127.4, 125.8, 125.4(q,  
 $J = 3.0$  Hz), 122.8, 122.7, 121.1, 101.1, 92.3, 24.7, 21.4.  $^{19}\text{F}$  NMR (500 MHz,  $\text{CDCl}_3$ )  
 $\delta$  -62.64, -62.83 (d).;  $^{29}\text{Si}$  NMR(500MHz,  $\text{CDCl}_3$ )  $\delta$  26.3.; IR (KBr,  $\text{cm}^{-1}$ ): 2923.4,  
 2855.6, 2147.3, 1608.5, 1428.3, 1107.6, 787.8, 731.6, 697.7. HRMS (ESI  $m/z$  Calcd  
 for  $\text{C}_{33}\text{H}_{26}\text{F}_6\text{Si}$   $[\text{M}+\text{H}]^+$  : 565.1781 found: 565.1167

HPLC: Chiralpak AD-H column (hexanes: isopropanol = 99.7:0.3, 0.8 mL/min, 254 nm,  
 94% *ee*).  $t_R = 15.213$  min (major),  $t_R = 9.587$  min (minor).

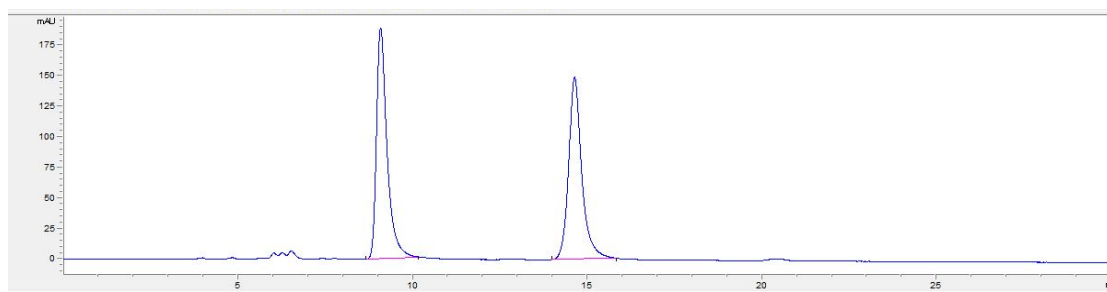

|   | Time/min | Area   | Height | Area%  |
|---|----------|--------|--------|--------|
| 1 | 9.633    | 3551   | 138.1  | 50.232 |
| 2 | 15.602   | 3518.2 | 84.6   | 49.768 |

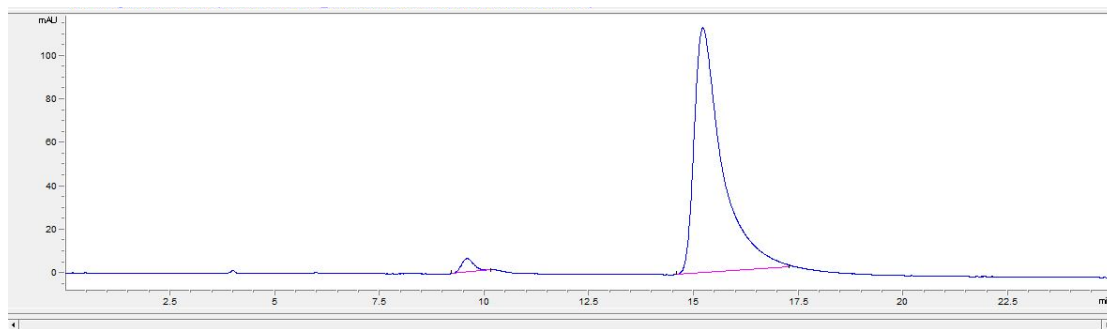

|   | Time/min | Area   | Height | Area%  |
|---|----------|--------|--------|--------|
| 1 | 9.587    | 138.6  | 6.4    | 2.940  |
| 2 | 15.213   | 5207.9 | 112.9  | 97.060 |

**(*S,E*)-(1,4-bis(2-fluorophenyl)but-1-en-3-yn-2-yl)(mesityl)(phenyl)silane**

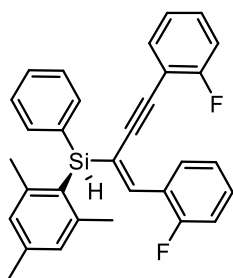

**3x** was synthesized following the general procedure C. White liquid (53.9 mg, 58% yield). purified by column chromatography (Al<sub>2</sub>O<sub>3</sub>, PE/EA= 300:1).  $[\alpha]_{25}^D = -4.29$  (c = 1.26, CHCl<sub>3</sub>). <sup>1</sup>H NMR (400 MHz, CDCl<sub>3</sub>)  $\delta$  8.83 (t, *J* = 8.0 Hz, 1H), 7.74 – 7.68 (m, 2H), 7.41 – 7.35 (m, 3H), 7.29 – 7.15 (m, 3H), 7.13 – 7.06 (m, 1H), 7.05 – 6.97 (m, 3H), 6.89 (s, 2H), 5.66 (s, 1H), 2.44 (s, 6H), 2.29 (s, 3H).; <sup>13</sup>C NMR (100 MHz, CDCl<sub>3</sub>)  $\delta$  162.7(d, *J* = 241.0 Hz), 160.2(d, *J* = 241.0 Hz), 145.8, 140.4, 140.0, 139.9, 135.7, 133.5, 133.2, 130.7(d, *J* = 80.0 Hz), 130.1(d, *J* = 80.0 Hz), 129.8, 129.2, 129.0, 128.2, 126.1, 125.5, 125.4, 124.0(d, *J* = 40.0 Hz),, 123.9(d, *J* = 40.0 Hz), 119.5, 115.5(d, *J* = 40.0 Hz),, 115.3(d, *J* =22.0 Hz), 112.6, 112.4, 95.4, 77.5, 77.2, 76.8, 24.7, 21.4. <sup>19</sup>F NMR (500 MHz, CDCl<sub>3</sub>)  $\delta$  -109.10 - -116.90 (m).; <sup>29</sup>Si NMR(500MHz, CDCl<sub>3</sub>)  $\delta$  26.3.; IR (KBr, cm<sup>-1</sup>): 2923.4, 2146.3, 1604.7, 1500.1, 1458.3, 1096.9, 757.8, 731.6, 697.7. HRMS (ESI m/z Calcd for C<sub>31</sub>H<sub>26</sub>F<sub>2</sub>Si [M+Na]<sup>+</sup> : 487.1664 found: 487.1662 HPLC: Chiralpa Phenomenex column (hexanes: isopropanol = 99.9:0.1, 0.8 mL/min, 230 nm, 90% *ee*). tR =10.636 min (major), tR = 8.765 min (minor).

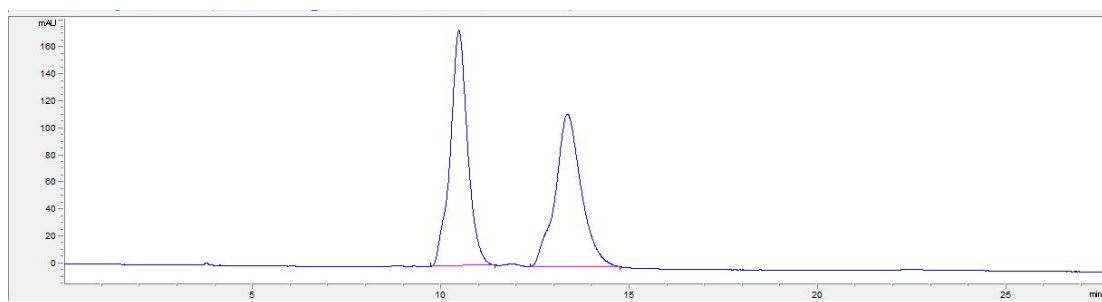

|   | Time/min | Area   | Height | Area%  |
|---|----------|--------|--------|--------|
| 1 | 10.471   | 5589.4 | 174.4  | 50.707 |
| 2 | 13.355   | 5433.6 | 113.3  | 49.293 |

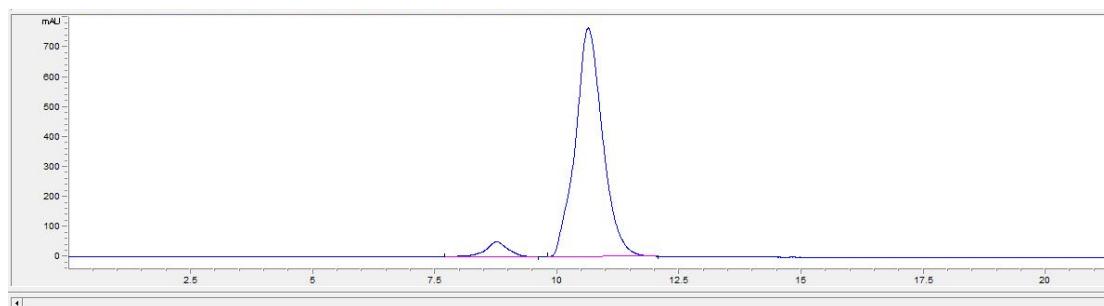

|   | Time/min | Area    | Height | Area%  |
|---|----------|---------|--------|--------|
| 1 | 8.765    | 1619.3  | 50.2   | 5.175  |
| 2 | 10.636   | 29673.5 | 764.1  | 94.825 |

**(*S,E*)-(1,4-bis(4-fluorophenyl)but-1-en-3-yn-2-yl)(mesityl)(phenyl)silane**

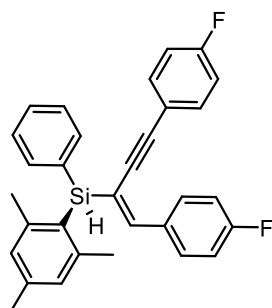

**3y** was synthesized following the general procedure C. White liquid (53.9 mg, 58% yield). purified by column chromatography (Al<sub>2</sub>O<sub>3</sub>, PE/EA= 300:1).  $[\alpha]_{25}^D = -4.70$  (c = 3.32, CHCl<sub>3</sub>). <sup>1</sup>H NMR (400 MHz, CDCl<sub>3</sub>)  $\delta$  7.92 – 7.84 (m, 2H), 7.59 (d, *J* = 8.0 Hz, 2H), 7.32 – 7.24 (m, 3H), 7.12 – 7.07 (m, 2H), 7.00 – 6.93 (m, 2H), 6.89 – 6.83 (m, 3H), 6.80 (s, 2H), 5.52 (s, 1H), 2.33 (s, 6H), 2.21 (s, 3H).; <sup>13</sup>C NMR (100 MHz, CDCl<sub>3</sub>)  $\delta$  163.9 (d, *J* = 28.0 Hz), 161.48(d, *J* = 28.0 Hz), 146.7, 145.8, 140.4, 135.7, 134.0(d, *J* = 3.0 Hz), 133.41, 133.3(d, *J* = 8.0 Hz), 130.9(d, *J* = 8.0 Hz), 129.8, 129.0, 128.2, 126.3, 120.0(d, *J* = 3.0 Hz), 117.1(d, *J* = 3.0 Hz), 115.7(d, *J* = 22.0 Hz), 115.4(d, *J* = 22.0 Hz), 100.4, 90.2, 77.5, 77.2, 76.84, 2.64, 21.4. <sup>19</sup>F NMR (500 MHz, CDCl<sub>3</sub>)  $\delta$  -110.76 - -111.04 (m).; IR (KBr, cm<sup>-1</sup>): 3065.9, 2915.7, 2155.0, 1601.7, 1506.8, 1227.7, 837.2, 735.5. HRMS (ESI *m/z* Calcd for C<sub>31</sub>H<sub>26</sub>F<sub>2</sub>Si [M+H]<sup>+</sup> : 465.1845 found: 465.1857  
HPLC: Chiralpak AD-H column (hexanes: isopropanol = 99.7:0.3, 0.8 mL/min, 230 nm, 95% *ee*). *t*R =14.325min (major), *t*R = 9.347 min (minor).

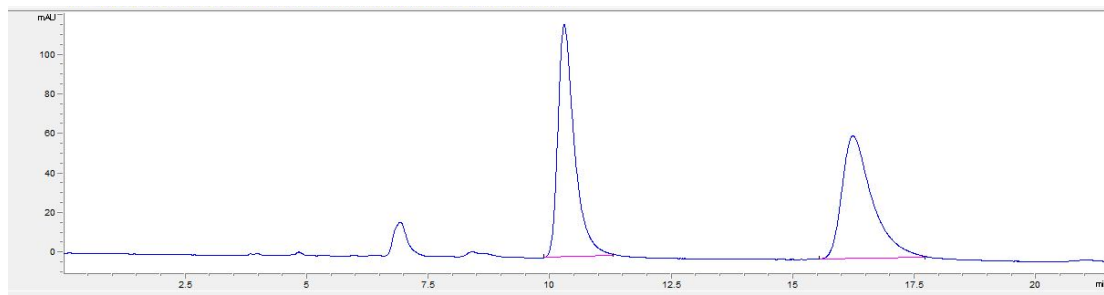

|   | Time/min | Area   | Height | Area%  |
|---|----------|--------|--------|--------|
| 1 | 10.292   | 2788.7 | 117.6  | 50.851 |
| 2 | 16.236   | 2695.4 | 62.1   | 49.149 |

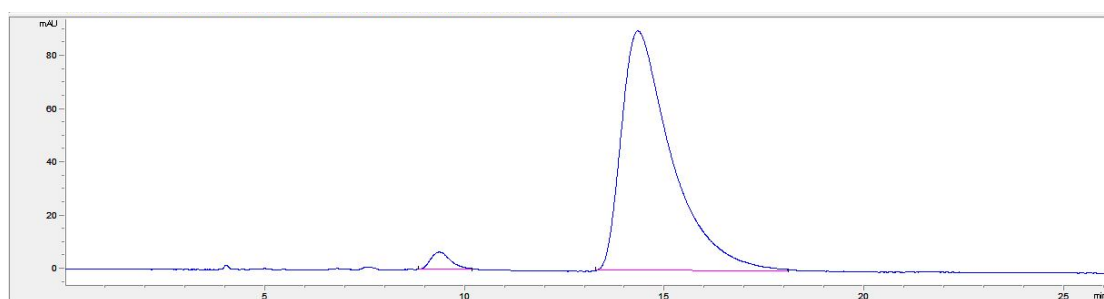

|   | Time/min | Area   | Height | Area%  |
|---|----------|--------|--------|--------|
| 1 | 9.347    | 222.2  | 6.5    | 2.731  |
| 2 | 14.325   | 7913.7 | 90.2   | 97.269 |

**(*R,E*)-(2,6-diethyl-4-methylphenyl)(phenyl)(1-phenylpent-1-en-3-yn-2-yl)silane**

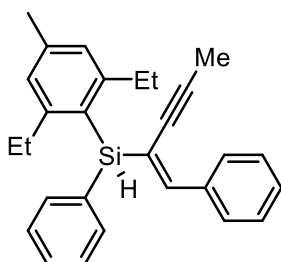

**3aa** was synthesized following the general procedure C. White liquid (37.9 mg, 48% yield). purified by column chromatography (Al<sub>2</sub>O<sub>3</sub>, PE/EA= 300:1).  $[\alpha]_{25}^D = 1.56$  (c = 1.47, CHCl<sub>3</sub>). <sup>1</sup>H NMR (400 MHz, CDCl<sub>3</sub>)  $\delta$  7.96 (d, *J* = 8.0 Hz, 2H), 7.69 (d, *J* = 8.0



Hz, 2H), 7.43 – 7.35 (m, 5H), 7.34 – 7.29 (m, 1H), 6.98 (s, 2H), 6.91 (s, 1H), 5.55 (s, 1H), 2.86 – 2.77 (m, 4H), 2.39 (s, 3H), 2.09 (s, 3H), 1.10 (t,  $J = 8.0$  Hz, 6H).;  $^{13}\text{C}$  NMR (100 MHz,  $\text{CDCl}_3$ )  $\delta$  152.4, 147.5, 140.4, 137.8, 135.8, 134.3, 129.4, 128.8, 128.6, 128.3, 127.9, 127.6, 125.2, 119.2, 99.1, 80.8, 30.7, 21.6, 16.9, 5.4. IR (KBr,  $\text{cm}^{-1}$ ): 3059.1, 2961.2, 2866.3, 2151.2, 1595.9, 1428.3, 1104.7, 915.7, 807.2, 727.7, 693.8. HRMS (APCI  $m/z$  Calcd for  $\text{C}_{28}\text{H}_{30}\text{Si}$   $[\text{M}+\text{H}]^+$  : 395.2190 found: 395.2064

HPLC: Chiralpa Phenomenex column (hexanes: isopropanol = 99.9:0.1, 0.8 mL/min, 230 nm, >99% *ee*).  $t_R = 10.673$  min (major),  $t_R = 9.558$  min (minor)

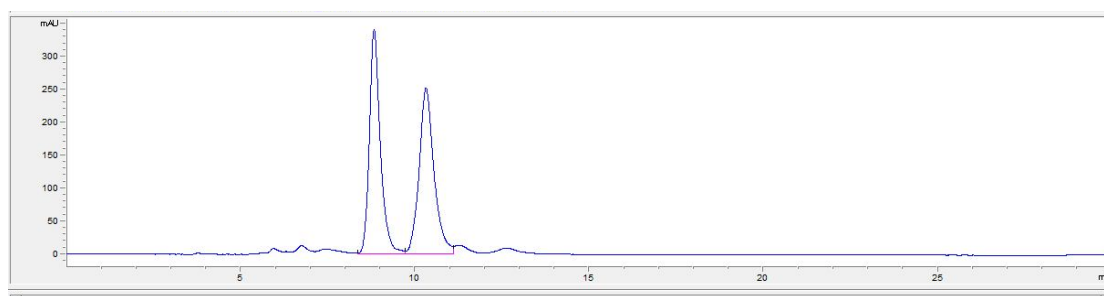

|   | Time/min | Area   | Height | Area%  |
|---|----------|--------|--------|--------|
| 1 | 8.824    | 7453.5 | 340.5  | 49.874 |
| 2 | 10.313   | 252.2  | 252.2  | 50.126 |

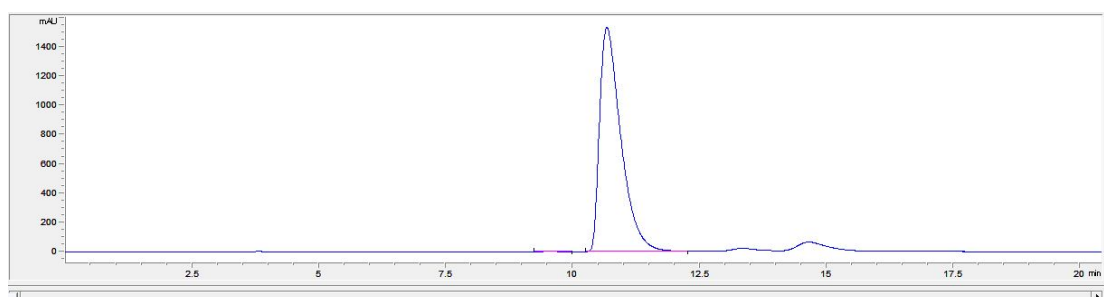

|   | Time/min | Area    | Height | Area%  |
|---|----------|---------|--------|--------|
| 1 | 9.558    | 36.3    | 1.8    | 0.081  |
| 2 | 10.673   | 44696.1 | 1531.2 | 99.919 |

**(*S,E*)-mesityl(phenyl)(1-(thiophen-2-yl)pent-1-en-3-yn-2-yl)silane**

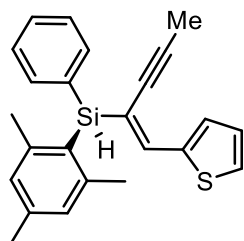

**3ab** was synthesized following the general procedure C. White liquid (48.4 mg, 65% yield). purified by column chromatography ( $\text{Al}_2\text{O}_3$ , PE/EA= 300:1).  $[\alpha]_{25}^{\text{D}} = 12.35$  ( $c = 0.17$ ,  $\text{CHCl}_3$ ).  $^1\text{H}$  NMR (400 MHz,  $\text{CDCl}_3$ )  $\delta$  7.63 (d,  $J = 7.8$  Hz, 2H), 7.42 – 7.29 (m, 4H), 7.19 (d,  $J = 3.5$  Hz, 1H), 7.10 (s, 1H), 7.01 (d,  $J = 3.8$  Hz, 1H), 6.88 (s, 2H), 5.51 (s, 1H), 2.37 (s, 6H), 2.31 (s, 3H), 2.13 (s, 3H).;  $^{13}\text{C}$  NMR (100 MHz,  $\text{CDCl}_3$ )  $\delta$  145.9, 142.5, 141.1, 140.2, 135.6, 133.9, 129.7, 129.6, 128.9, 128.1, 126.9, 126.4, 126.3, 115.2, 101.6, 81.4, 24.6, 21.4, 5.7. HRMS (ESI  $m/z$  Calcd for  $\text{C}_{24}\text{H}_{24}\text{SSi}$   $[\text{M}+\text{H}]^+$ : 373.1441 found: 373.1438

HPLC: Chiralpa AD-H column (hexanes: isopropanol = 99.7:0.3, 0.8 mL/min, 360 nm, 91% *ee*).  $t_{\text{R}} = 11.453$  min (major),  $t_{\text{R}} = 7.028$  min (minor)

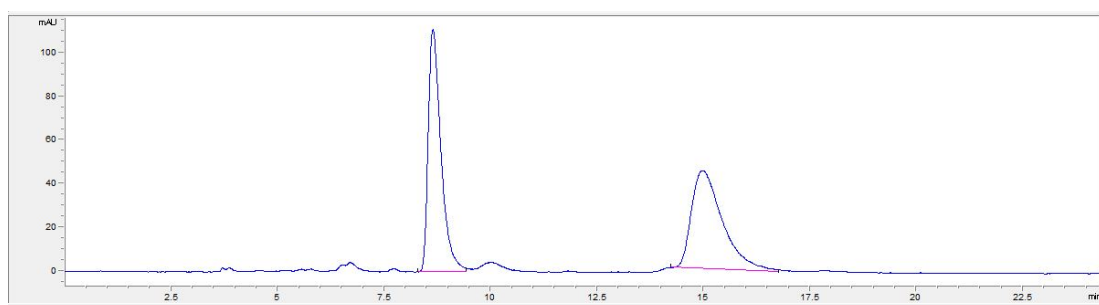

|   | Time/min | Area   | Height | Area%  |
|---|----------|--------|--------|--------|
| 1 | 8.646    | 2316.5 | 110.8  | 50.381 |
| 2 | 14.992   | 2281.5 | 44.9   | 49.619 |

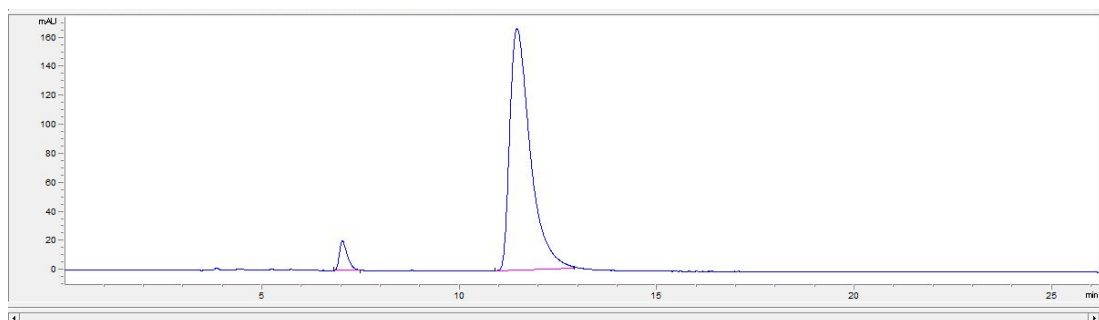

|   | Time/min | Area   | Height | Area%  |
|---|----------|--------|--------|--------|
| 1 | 7.028    | 294.4  | 20.4   | 4.655  |
| 2 | 11.453   | 6030.1 | 166.6  | 95.345 |

**(*R,E*)-phenyl(1-phenylpent-1-en-3-yn-2-yl)(*o*-tolyl)silane**

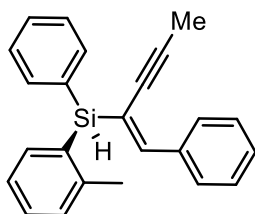

**3ac** was synthesized following the general procedure C. White liquid (36.6 mg, 54% yield). purified by column chromatography ( $\text{Al}_2\text{O}_3$ , PE/EA= 300:1).  $[\alpha]_{25}^D = -1.55$  ( $c = 1.61$ ,  $\text{CHCl}_3$ ).  $^1\text{H NMR}$  (400 MHz,  $\text{CDCl}_3$ )  $\delta$  7.92 (d,  $J = 8.0$  Hz, 2H), 7.63 (d,  $J = 8.0$  Hz, 2H), 7.54 (d,  $J = 8.0$  Hz, 1H), 7.43 – 7.30 (m, 6H), 7.29 – 7.23 (m, 1H), 7.22 – 7.14 (m, 2H), 6.86 (s, 1H), 5.35 (s, 1H), 2.41 (s, 3H), 2.01 (s, 3H);  $^{13}\text{C NMR}$  (100 MHz,  $\text{CDCl}_3$ )  $\delta$  148.0, 144.9, 137.6, 137.0, 135.9, 132.9, 131.6, 130.4, 129.9, 129.8, 128.8, 128.3, 128.1, 125.2, 118.1, 99.3, 80.4, 77.5, 77.2, 76.8, 29.8, 22.8, 5.4.; HRMS (APCI  $m/z$  Calcd for  $\text{C}_{24}\text{H}_{22}\text{Si}$   $[\text{M}+\text{H}]^+$  :339.1491 found:339.1455 HPLC:Chiralpa AD-H column (hexanes: isopropanol = 99.7:0.3, 0.8 mL/min, 230 nm, 40% ee).  $t_R = 11.117$  min (major),  $t_R = 9.593$  min (minor)

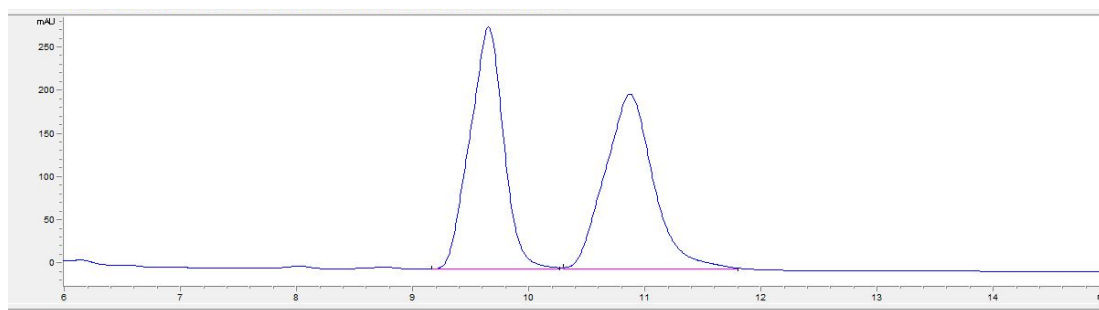

|   | Time/min | Area   | Height | Area%  |
|---|----------|--------|--------|--------|
| 1 | 9.649    | 5704.8 | 280.3  | 48.745 |
| 2 | 10.868   | 5998.6 | 203.3  | 51.255 |

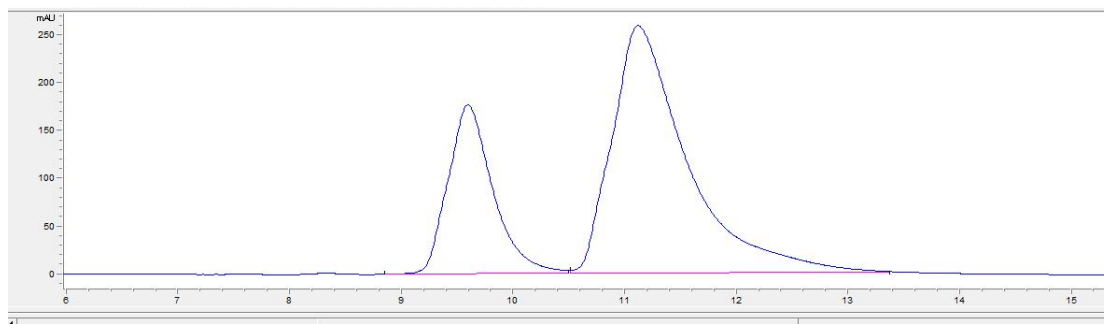

|   | Time/min | Area    | Height | Area%  |
|---|----------|---------|--------|--------|
| 1 | 9.593    | 4969.3  | 177    | 29.098 |
| 2 | 11.117   | 12108.7 | 258.9  | 70.902 |

**(*R,E*)-naphthalen-1-yl(phenyl)(1-phenylpent-1-en-3-yn-2-yl)silane**

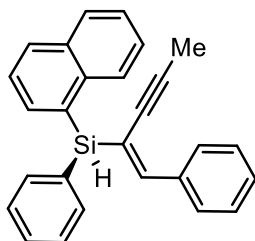

**3ad** was synthesized following the general procedure C. Yellow liquid (40.5 mg, 54% yield). purified by column chromatography (Al<sub>2</sub>O<sub>3</sub>, PE/EA= 300:1). [ $\alpha$ ]<sub>25</sub><sup>D</sup> = -2.37 (c = 1.69, CHCl<sub>3</sub>). <sup>1</sup>H NMR (400 MHz, CDCl<sub>3</sub>)  $\delta$  8.13 (d, *J* = 12.0 Hz, 1H), 7.94 – 7.88 (m, 3H), 7.87 – 7.80 (m, 2H), 7.70 – 7.64 (m, 2H), 7.48 – 7.37 (m, 5H), 7.37 – 7.26 (m, 4H), 6.92 (s, 1H), 5.67 (s, 1H), 1.98 (s, 3H).; <sup>13</sup>C NMR (100 MHz, CDCl<sub>3</sub>)  $\delta$  148.4, 137.5, 137.5, 136.9, 136.0, 133.4, 132.8, 131.0, 130.9, 130.0, 128.9, 128.8, 128.4, 128.3, 128.2, 126.3, 125.8, 125.4, 118.1, 99.5, 80.5, 29.8, 5.4.; HRMS (APCI *m/z* Calcd for C<sub>27</sub>H<sub>22</sub>Si [M+H]<sup>+</sup> :375.1491 found:375.1014

HPLC: Chiralpa AD-H column (hexanes: isopropanol = 99.7:0.3, 0.8 mL/min, 230 nm, 22% *ee*). tR =22.864 min (major), tR = 17.53 min (minor)

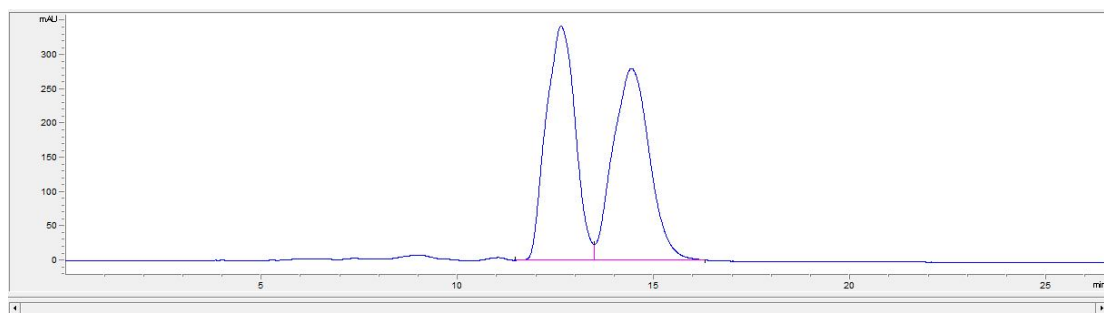

|   | Time/min | Area    | Height | Area%  |
|---|----------|---------|--------|--------|
| 1 | 12.622   | 17652.3 | 342.3  | 49.329 |
| 2 | 14.426   | 18132.2 | 2280.5 | 50.671 |

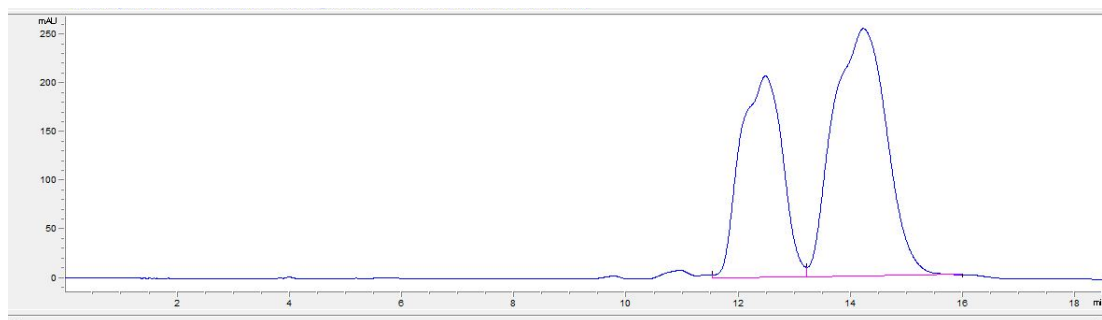

|   | Time/min | Area    | Height | Area%  |
|---|----------|---------|--------|--------|
| 1 | 12.475   | 10762.7 | 207.1  | 39.028 |
| 2 | 14.222   | 16813.9 | 254.4  | 60.972 |

**(*R,E*)-tert-butyl(phenyl)(1-phenylpent-1-en-3-yn-2-yl)silane**

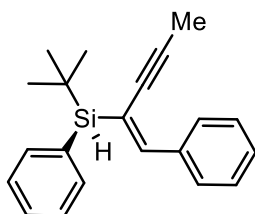

**3ae** was synthesized following the general procedure C. Yellow liquid (26.2 mg, 43% yield). purified by column chromatography (Al<sub>2</sub>O<sub>3</sub>, PE/EA= 300:1).  $[\alpha]_{25}^D = 1.67$  (c = 1.50, CHCl<sub>3</sub>). <sup>1</sup>H NMR (400 MHz, CDCl<sub>3</sub>)  $\delta$  7.85 (d, *J* = 8.0 Hz, 2H), 7.68 (d, *J* = 8.0 Hz, 2H), 7.34 – 7.23 (m, 5H), 7.22 – 7.14 (m, 1H), 6.94 (s, 1H), 4.33 (s, 1H), 2.07 (s, 3H), 1.03 (s, 9H).; <sup>13</sup>C NMR (100 MHz, CDCl<sub>3</sub>)  $\delta$  148.0, 137.7, 135.7, 133.9, 129.7, 128.8, 128.6, 128.3, 127.8, 118.4, 98.9, 81.1, 27.6, 18.5, 5.4.; HRMS (ESI *m/z* Calcd for C<sub>21</sub>H<sub>24</sub>Si [M+H]<sup>+</sup> :305.1647 found:305.1678

HPLC:Chiralpa AD-H column (hexanes: isopropanol = 99.7:0.3, 0.8 mL/min, 254 nm, 20% *ee*). tR =7.331 min (major), tR = 5.674 min (minor)

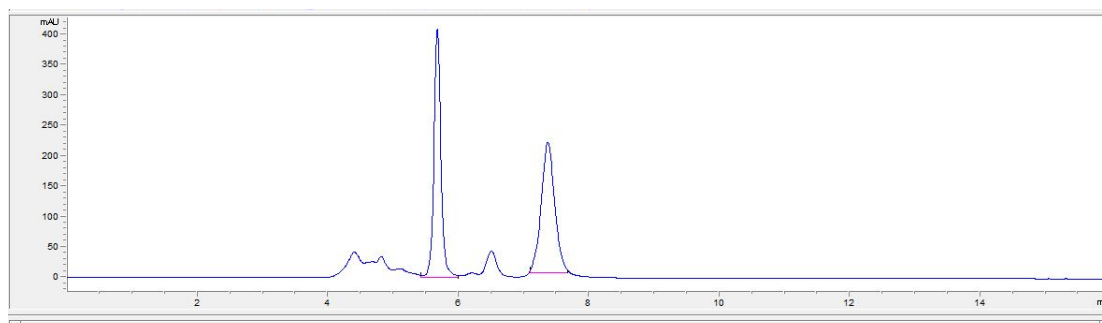

|   | Time/min | Area   | Height | Area%  |
|---|----------|--------|--------|--------|
| 1 | 5.674    | 3037.4 | 408.8  | 49.596 |
| 2 | 7.37     | 3086.9 | 215.1  | 50.404 |

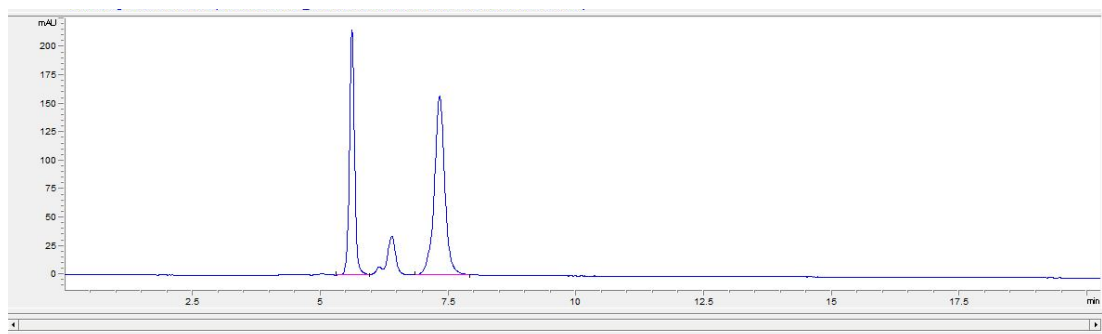

|   | Time/min | Area   | Height | Area%  |
|---|----------|--------|--------|--------|
| 1 | 5.614    | 1490.8 | 215.1  | 39.931 |
| 2 | 7.331    | 2242.6 | 157.1  | 60.069 |

**(8*R*,9*S*,10*R*,13*S*,14*S*,17*S*)-17-hydroxy-17-((*E*)-3-(mesityl(phenyl)silyl)-4-phenylbut-3-en-1-yn-1-yl)-13-methyl-1,2,6,7,8,9,10,11,12,13,14,15,16,17-tetradecahydro-3*H*-cyclopenta[*a*]phenanthren-3-one**

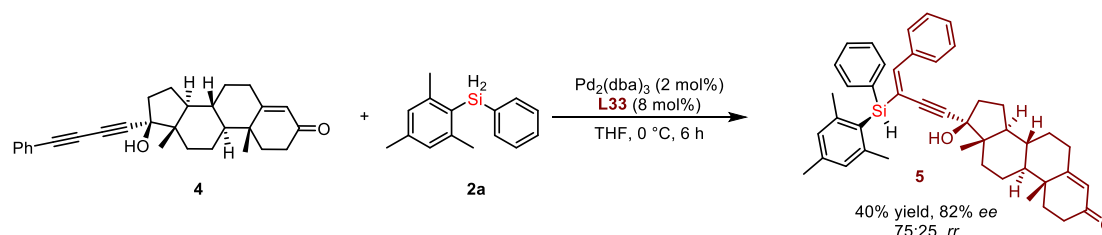

**5** was synthesized following the general procedure C. White liquid (51.1 mg, 40% yield). purified by column chromatography (Al<sub>2</sub>O<sub>3</sub>, PE/EA= 8:1).  $[\alpha]_{25}^D = 38.58$  (c = 1.2, CHCl<sub>3</sub>). <sup>1</sup>H NMR (400 MHz, CDCl<sub>3</sub>)  $\delta$  7.63 (d, *J* = 8.0 Hz, 2H), 7.46 – 7.31 (m, 3H), 7.31 – 7.22 (m, 3H), 7.24 – 7.13 (m, 1H), 6.87 (s, 2H), 6.38 (s, 1H), 5.74 (s, 1H), 5.51 (s, 1H), 3.86 (s, 21H), 2.47 – 2.41 (m, 1H), 2.38 (s, 6H), 2.36 – 2.32 (m, 1H), 2.28 (s, 3H), 2.19 – 2.09 (m, 1H), 2.06 – 1.91 (m, 2H), 1.88 – 1.79 (m, 1H), 1.71 (m, 3H), 1.62 – 1.54 (m, 2H), 1.47 – 1.36 (m, 2H), 1.33 – 1.22 (m, 24H), 1.18 (s, 3H), 1.16 – 1.06 (m, 1H), 0.98 (s, 3H), 0.95 – 0.83 (m, 1H), 0.82 – 0.71 (m, 1H); <sup>13</sup>C NMR (100 MHz, CDCl<sub>3</sub>)  $\delta$  199.7, 171.3, 158.6, 145.7, 140.4, 135.5, 133.4, 131.3, 129.8, 128.9, 128.6, 128.4, 128.2, 126.1, 124.0, 123.1, 116.5, 102.2, 87.7, 87.2, 54.1, 50.7, 48.9, 38.7, 37.1, 36.5, 36.0, 34.1, 32.9, 32.3, 31.9, 24.7, 23.7, 21.4, 20.9, 17.6, 14.4. HRMS (ESI *m/z*) Calcd for C<sub>44</sub>H<sub>50</sub>O<sub>2</sub>Si [M+Na]<sup>+</sup>: 639.3653 found: 639.3714

HPLC: Chiralpa AD-H column (hexanes: isopropanol = 90:10, 1 mL/min, 230 nm, 83% *ee*).  $t_R = 19.012$  min (major),  $t_R = 14.047$  min (minor)

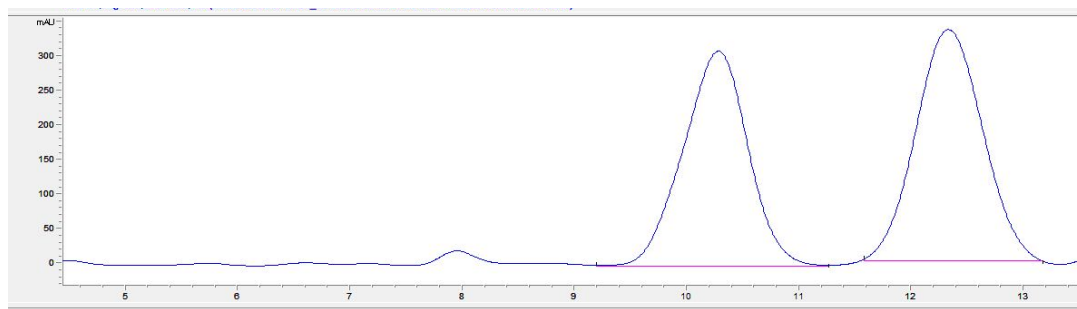

|   | Time/min | Area    | Height | Area%  |
|---|----------|---------|--------|--------|
| 1 | 10.282   | 12521.6 | 311    | 47.327 |
| 2 | 12.331   | 13936.2 | 335    | 52.673 |

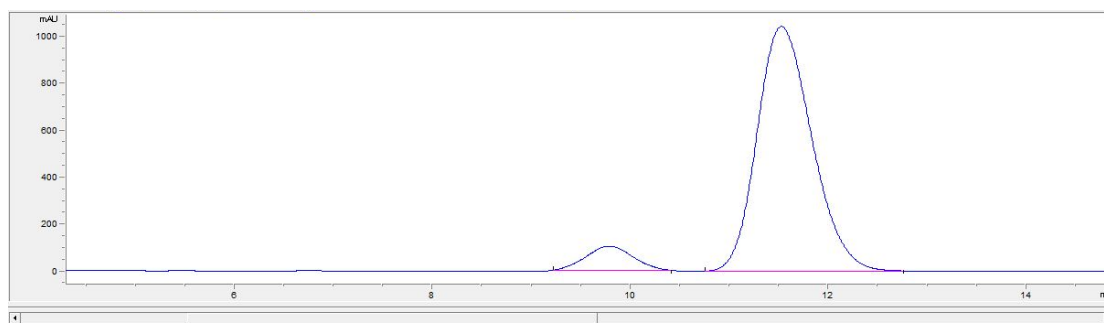

|   | Time/min | Area    | Height | Area%  |
|---|----------|---------|--------|--------|
| 1 | 9.795    | 3690    | 106.7  | 8.317  |
| 2 | 11.526   | 40676.9 | 1047.1 | 91.683 |

### 3.3 Synthetic Applications of Chiral Monohydrosilanes

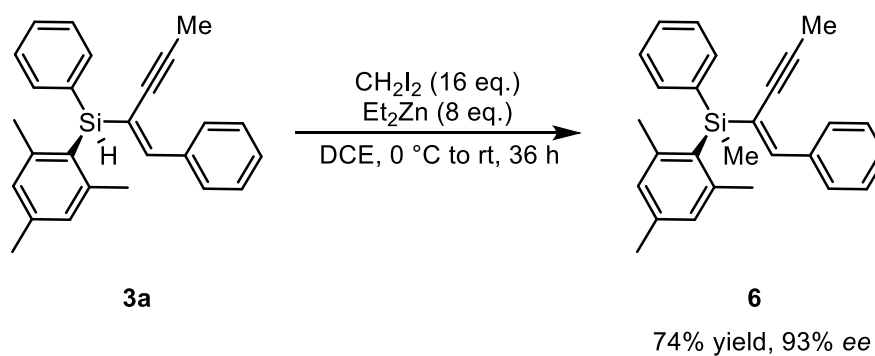

The procedure was followed the known literature. To a flame dried 25 mL Schlenk tube, a solution of 3a (36.3 mg, 0.1 mmol, 1M) in DCE (4 ml) was cooled to 0 °C, and

Et<sub>2</sub>Zn (0.8 mL, 0.8 mmol) was added to the solution under N<sub>2</sub> atmosphere. After that, CH<sub>2</sub>I<sub>2</sub> (428.5 mg, 1.6 mmol) was added dropwise. The reaction was kept at 0 °C for 20 min and warmed to room temperature for 36 h. After the reaction was completed, the reaction mixture was cooled to 0 °C and the saturated aqueous solution of NH<sub>4</sub>Cl was added. The aqueous phase was then extracted by DCM. The organic layer was washed with brine and dried over anhydrous Na<sub>2</sub>SO<sub>4</sub>. The resulting solution was concentrated and purified by preparative thin-layer chromatography using petroleum ether as the eluent to afford colorless liquid **6** (28.2 mg, 74% yield, 93% *ee*). [ $\alpha$ ]<sub>25</sub><sup>D</sup> = 34.3 (c = 0.14, CHCl<sub>3</sub>). <sup>1</sup>H NMR (400 MHz, CDCl<sub>3</sub>)  $\delta$  7.87 (d, *J* = 8.0 Hz, 2H), 7.58 (d, *J* = 8.0 Hz, 2H), 7.38 – 7.29 (m, 6H), 6.84 (s, 2H), 6.67 (s, 1H), 2.28 (s, 6H), 2.05 (s, 3H), 1.25 (s, 3H), 0.85 (s, 3H).; <sup>13</sup>C NMR (100 MHz, CDCl<sub>3</sub>)  $\delta$  145.9, 145.6, 139.4, 138.6, 138.0, 134.8, 129.4, 129.1, 128.7, 128.7, 128.4, 128.3, 128.0, 124.2, 98.7, 80.8, 25.3, 21.2, 5.4, 1.1.; HRMS (ESI *m/z* Calcd for C<sub>21</sub>H<sub>24</sub>Si [M+Na]<sup>+</sup>: 403.1853 found: 403.2353

HPLC: Chiralpa AD-H column (hexanes: isopropanol = 99.7:0.3, 0.8 mL/min, 280 nm, 93% *ee*). t<sub>R</sub> = 6.659 min (major), t<sub>R</sub> = 4.951 min (minor)

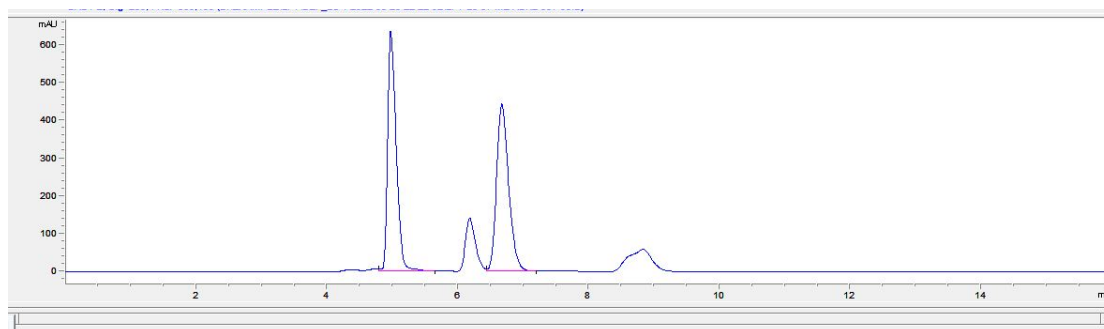

|   | Time/min | Area   | Height | Area%  |
|---|----------|--------|--------|--------|
| 1 | 4.972    | 5822.4 | 636.8  | 50.561 |
| 2 | 6.672    | 5693.1 | 443.4  | 49.439 |



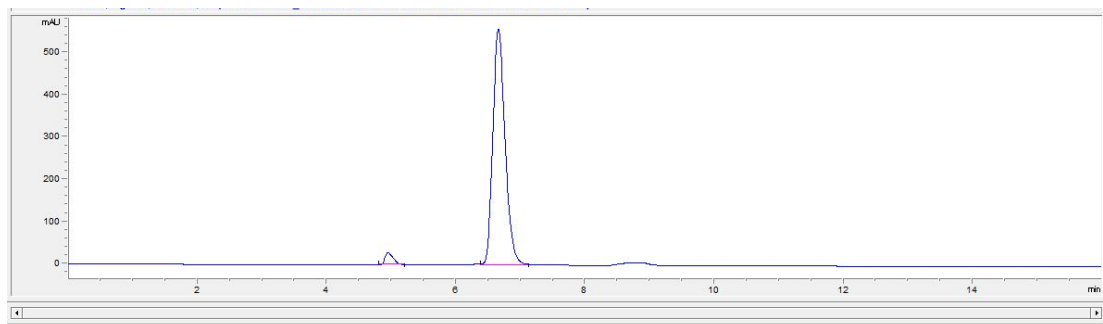

|   | Time/min | Area  | Height | Area%  |
|---|----------|-------|--------|--------|
| 1 | 4.951    | 253.6 | 28.8   | 3.334  |
| 2 | 6.659    | 7353  | 558.7  | 96.666 |

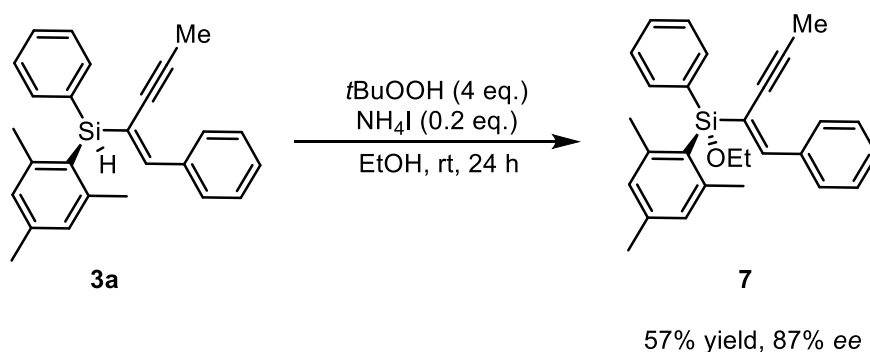

The procedure was followed the known literature. To a flame 25 mL Schlenk tube, a solution of **3a** (36.3 mg, 0.1 mmol, 1M) and ammonium iodide (2.9 mg, 0.02 mmol) in alcohol (1 mL) and 70% aqueous TBHP (36 mg, 0.4 mmol) was dropped wisely over a period of 10 min and stirred at room temperature for 24 h. Progress of the reaction was monitored by TLC, and after completion of the reaction, the mixture was quenched with saturated aq.  $\text{Na}_2\text{S}_2\text{O}_3$ . The organic layer was washed with brine and dried over anhydrous  $\text{Na}_2\text{SO}_4$ . The resulting solution was concentrated and purified by preparative thin-layer chromatography using petroleum ether as the eluent to afford colorless liquid **7** (23.4 mg, 57% yield, 87% ee).  $[\alpha]_{25}^D = 1.2$  (c = 0.99,  $\text{CHCl}_3$ ).  $^1\text{H}$  NMR (400 MHz,  $\text{CDCl}_3$ )  $\delta$  7.92 (d,  $J = 8.0$  Hz, 2H), 7.70 (d,  $J = 8.0$  Hz, 2H), 7.40 – 7.26 (m, 6H), 6.87 (s, 1H), 6.83 (s, 1H), 3.95 – 3.82 (m, 2H), 2.35 (s, 6H), 2.28 (s, 3H), 2.03 (s, 3H), 1.25

(t,  $J = 4.0$  Hz, 3H).  $^{13}\text{C}$  NMR (100 MHz,  $\text{CDCl}_3$ )  $\delta$  147.0, 146.1, 139.8, 137.8, 136.5, 135.1, 129.7, 129.3, 129.0, 128.7, 128.3, 127.9, 127.6, 121.8, 98.8, 80.8, 77.5, 76.8, 59.9, 24.7, 21.3, 18.5, 5.4.; HRMS (ESI  $m/z$  Calcd for  $\text{C}_{28}\text{H}_{30}\text{OSi}$   $[\text{M}+\text{H}]^+$ : 411.2034 found: 411.0838

HPLC: Chiralpa AD-H column (hexanes: isopropanol = 99.7:0.3, 0.8 mL/min, 280 nm, 87% ee).  $t_R = 10.156$  min (major),  $t_R = 14.37$  min (minor)

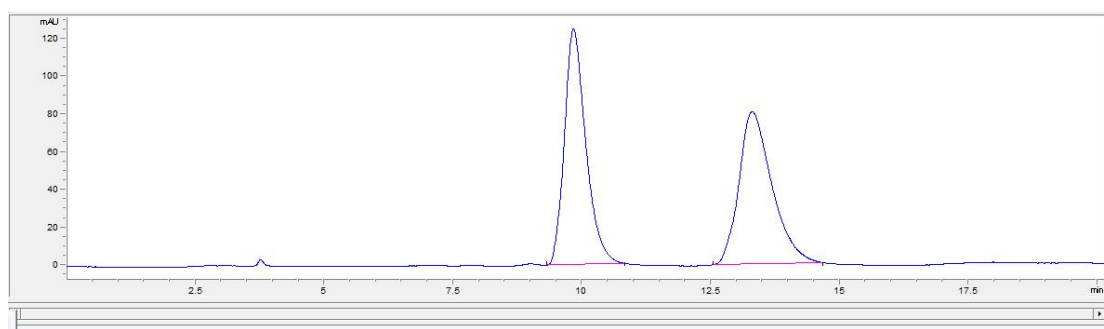

|   | Time/min | Area   | Height | Area%  |
|---|----------|--------|--------|--------|
| 1 | 9.836    | 3624.9 | 125    | 49.922 |
| 2 | 13.307   | 3636.2 | 81     | 50.078 |

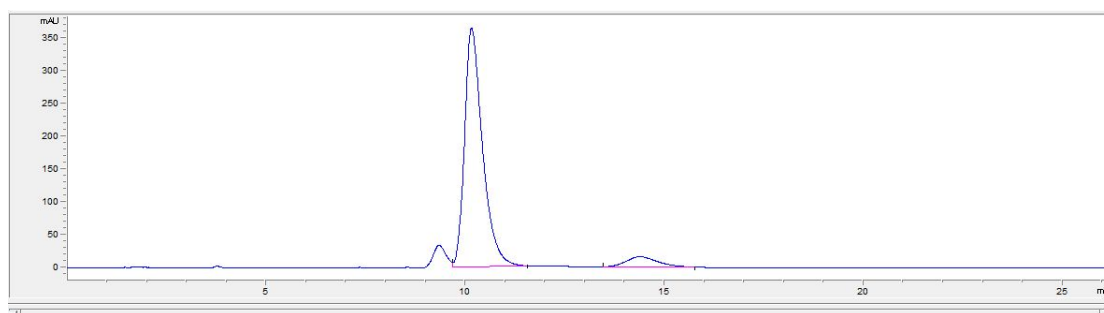

|   | Time/min | Area    | Height | Area%  |
|---|----------|---------|--------|--------|
| 1 | 10.156   | 11450.3 | 364.6  | 92.779 |
| 2 | 14.37    | 891.2   | 15.8   | 7.221  |

### 3.4 Gram-Scale Synthesis of **3a**

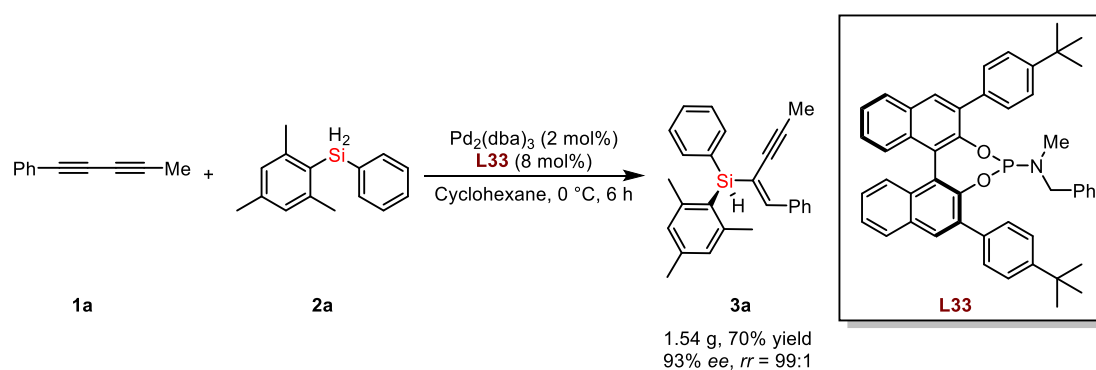

In a flame 100 mL dried Schlenk tube, Pd<sub>2</sub>(dba)<sub>3</sub> (109.9 mg, 0.12 mmol, 2 mol%), **L33** (335.9 mg, 0.48 mmol, 8 mol%) in cyclohexane (30 mL, 0.5M) was stirred at room temperature for 30 min under nitrogen atmosphere. Then diyne (6 mmol, 1 equiv.), dihydrosilanes (6 mmol, 1 equiv.) were added sequentially to the reaction mixture, and the reaction tube was cooled for 4 h at 0 °C. After completion of the reaction, the mixture was passed through a short celite pad using DCM as a solvent. The mixture was then concentrated in vacuo and purified by column chromatography using Petroleum ether-EtOAc (300:1) to give the desired product **3a** (1.54 g, 70% yield, 93% ee, rr = 99:1) in good yields.

### 3.5 Kinetic Study for the Pd-catalyzed Hydrosilylation

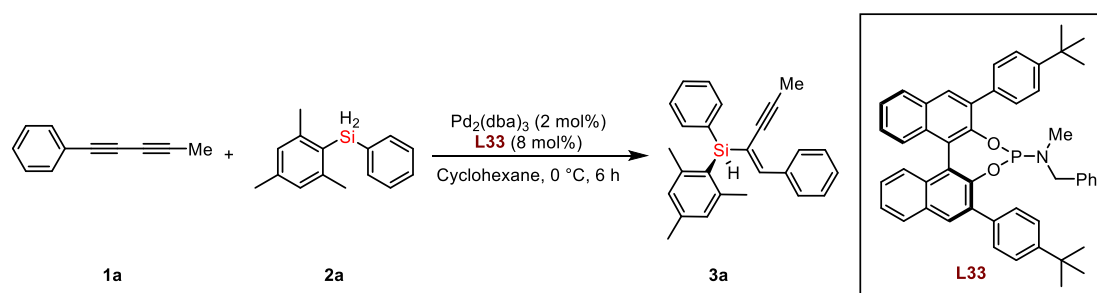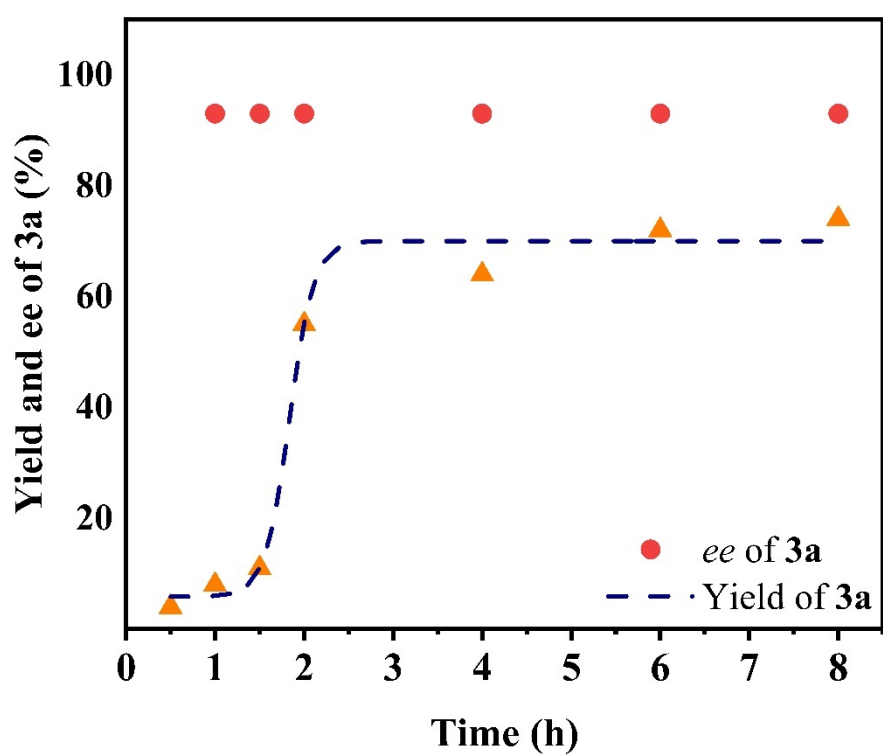

Figure S2. Kinetic Study for the Pd-catalyzed hydrosilylation of **1a**

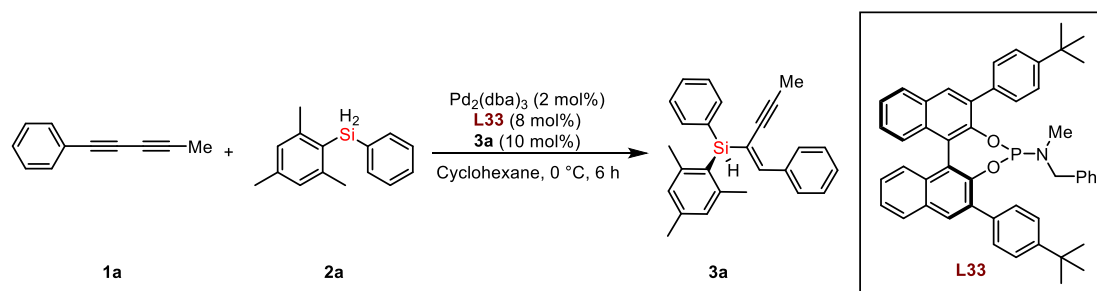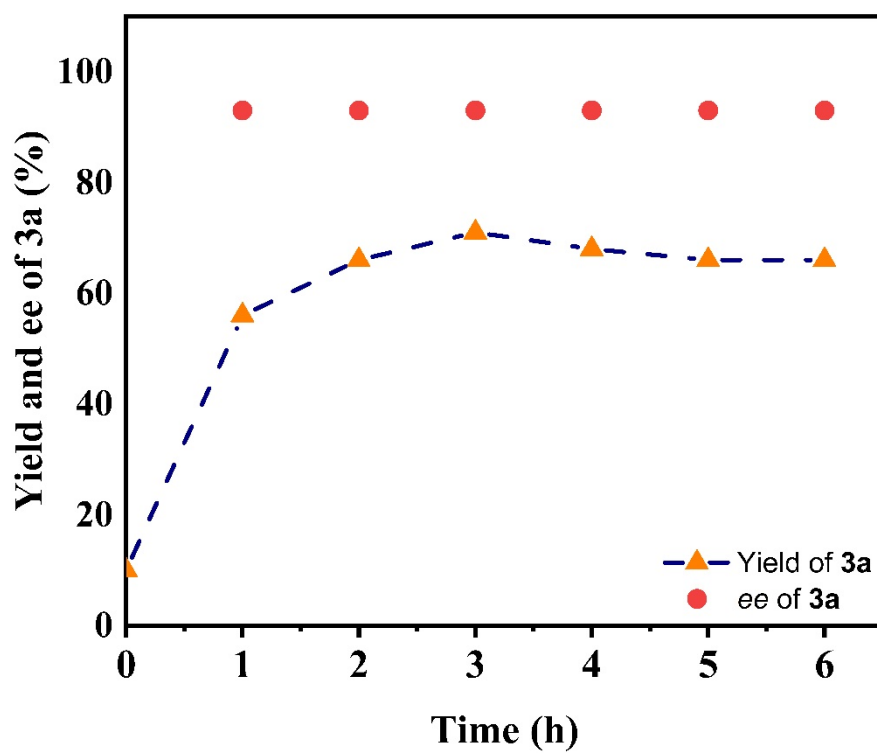

**Figure S3.** Kinetic Study for the Pd-catalyzed hydrosilylation of **1a** with **3a** (10 mol%) as additive

### 3.6 Experiments for Mechanistic Study

#### 3.6.1 Kinetic Study for the KIE

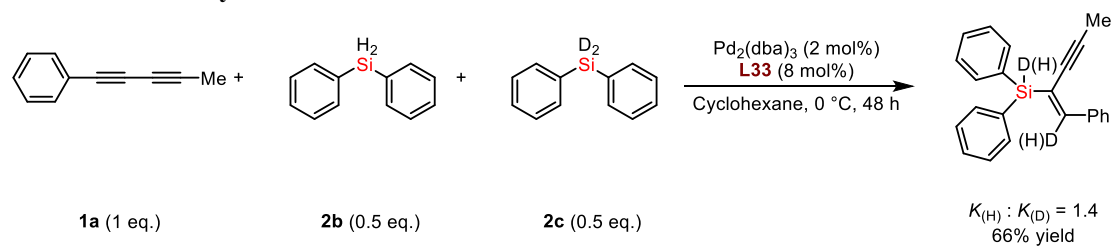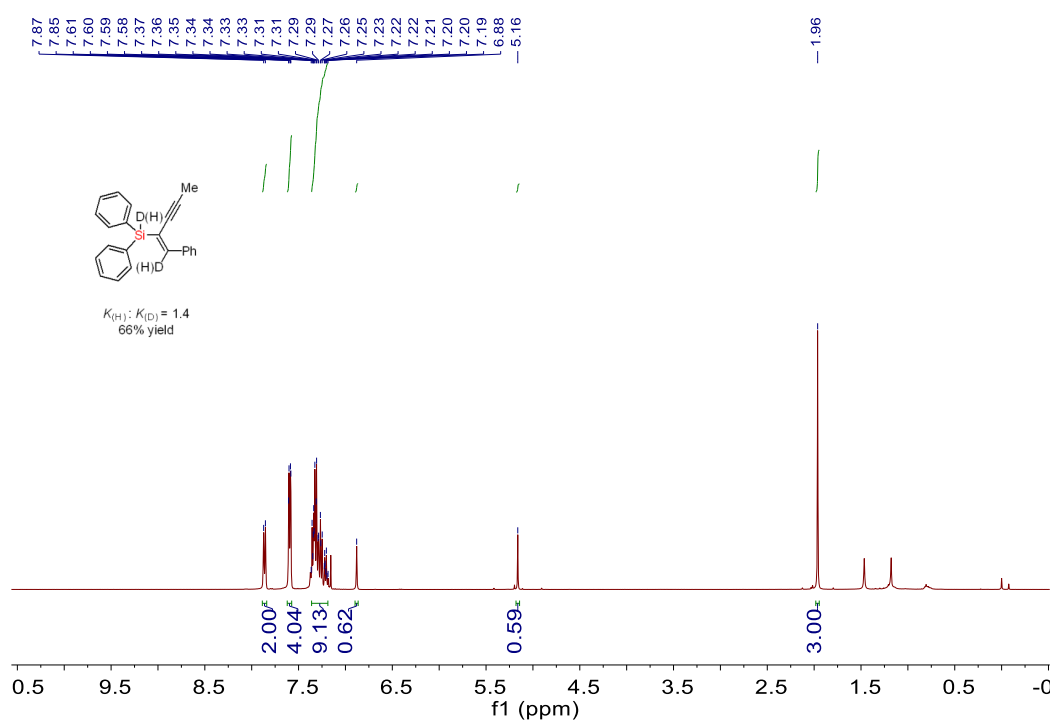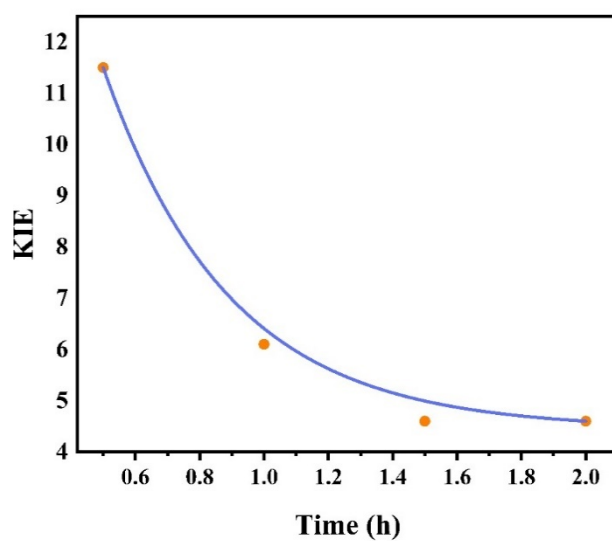

**Figure S4.** KIE analysis of the Pd-catalyzed hydrosilylation of **1a** for 2 h

### 3.6.2 The NLE study of the Pd-catalyzed Hydrosilylation of 1a

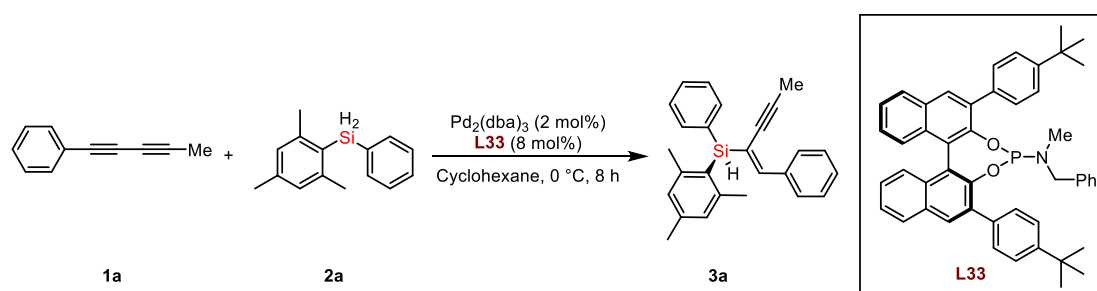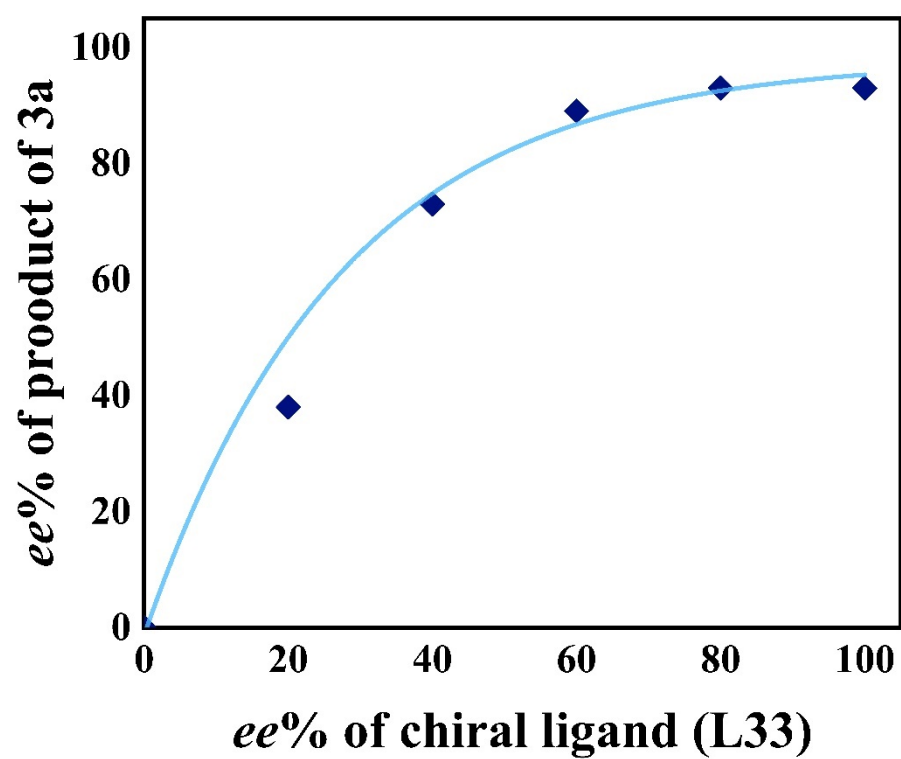

Figure S5. The study of possible NLE in the Pd-catalyzed hydrosilylation of 1a

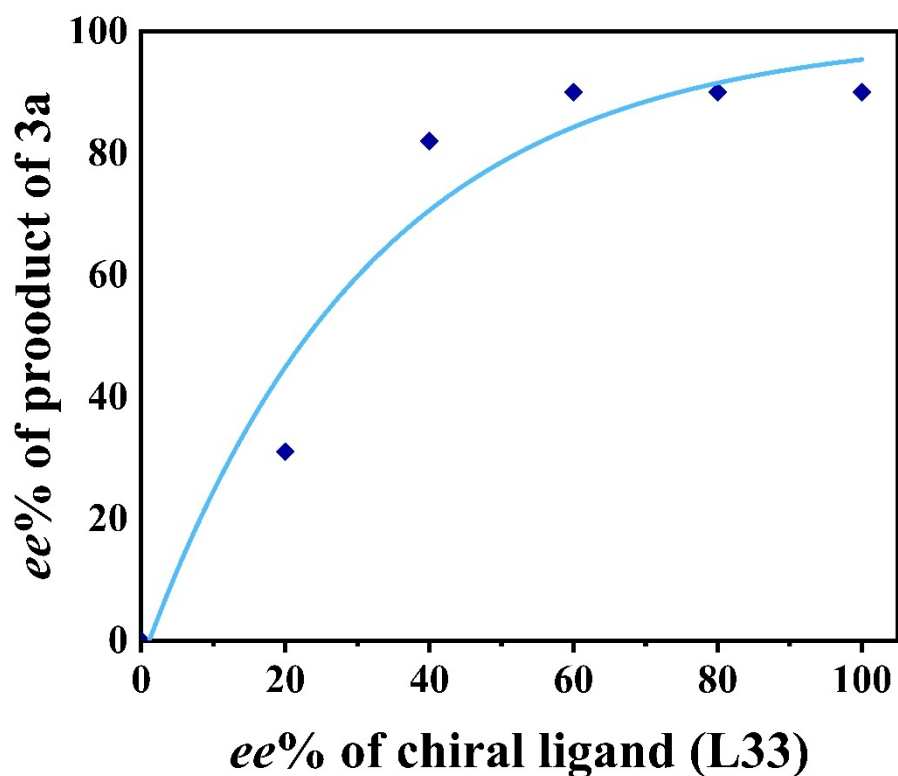

**Figure S6.** The study of possible NLE in the Pd-catalyzed hydrosilylation of **1a** with DCM as solvent.

**Table S8.** The effect of water on Pd-catalyzed hydrosilylation <sup>a</sup>

| Entry | water content (%) | Yield of <b>3a</b> (%) <sup>b</sup> | <i>ee</i> of <b>3a</b> (%) <sup>c</sup> |
|-------|-------------------|-------------------------------------|-----------------------------------------|
| 1     | 10                | 44                                  | 90                                      |
| 2     | 20                | 48                                  | 90                                      |
| 3     | 30                | 36                                  | 90                                      |
| 4     | 40                | 36                                  | 90                                      |
| 5     | 50                | 42                                  | 90                                      |

<sup>a</sup>Unless otherwise noted, reactions were conducted under N<sub>2</sub> on 0.1 mmol scale: **1a** (0.1 mmol), **2a** (0.1 mmol), Pd<sub>2</sub>(dba)<sub>3</sub> (2 mol%), L33 (8 mol%), THF : H<sub>2</sub>O (2 mL). <sup>b</sup>Determined by <sup>1</sup>H NMR using dibromomethane as an internal standard. <sup>c</sup>Determined by HPLC.



### 3.6.3 Competitive Experiment for the Different Reactivity of Aliphatic and Aromatic diynes.

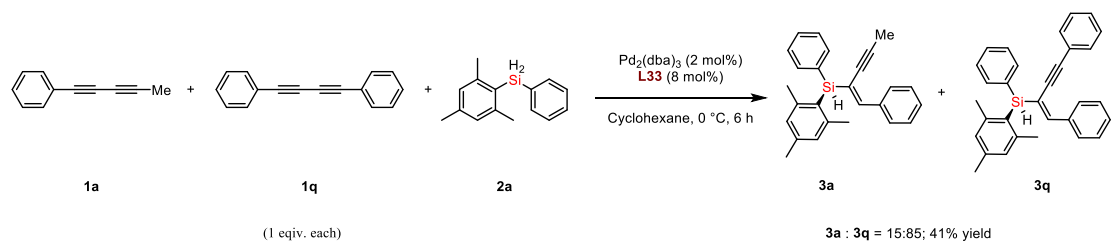

### 3.6.4 Comparison of $^{31}\text{P}$ NMR of Ligand and Pd/L33 Complex in the Reaction of 1a and 2a.

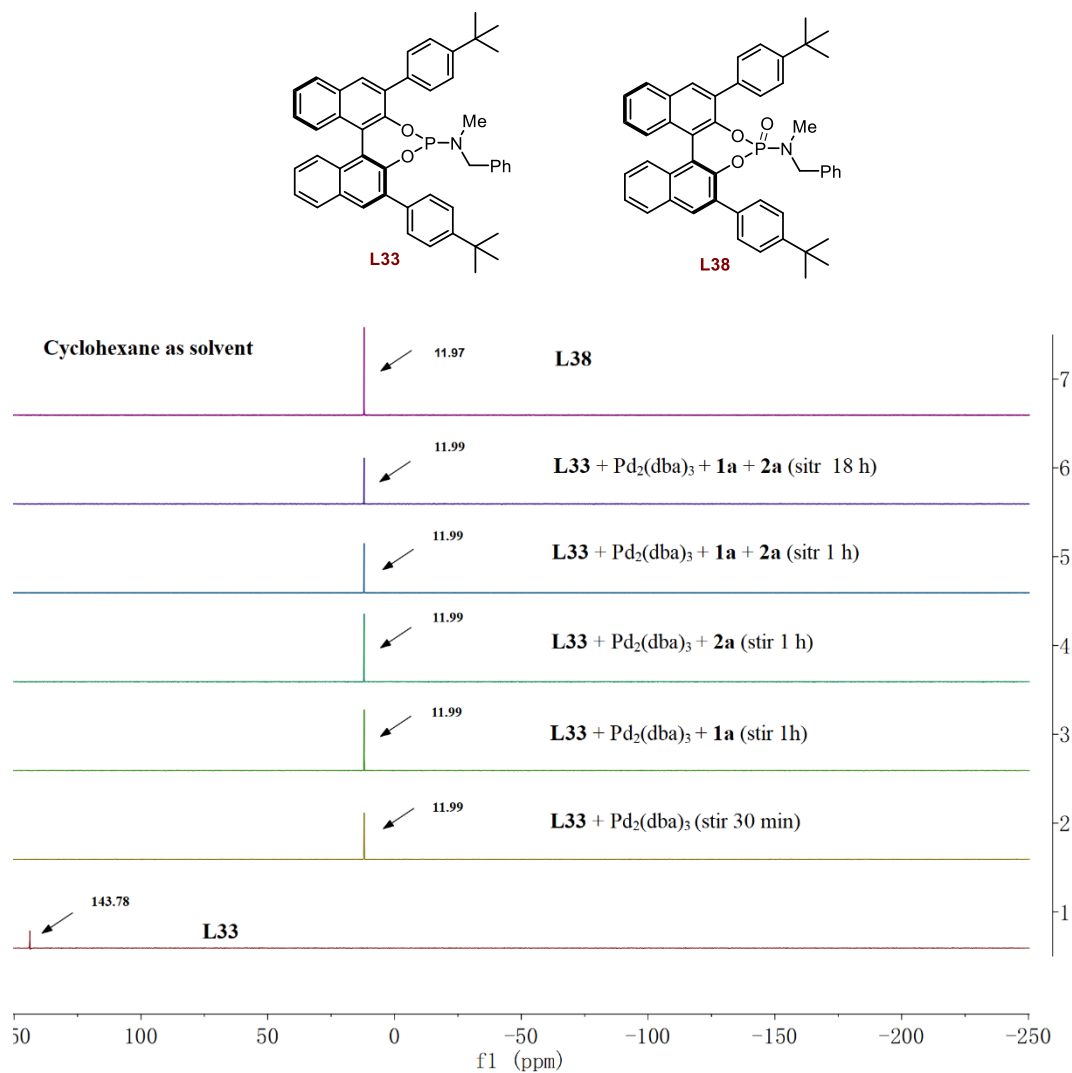

**Figure S7.** Comparison of  $^{31}\text{P}$  NMR of ligand and Pd/L33 complex in the reaction with **1a** and **2a**.

### 3.6.5 Comparison of $^1\text{H}$ NMR of L33, Pd/L33 Complex in the Reaction of 1a and 2a.

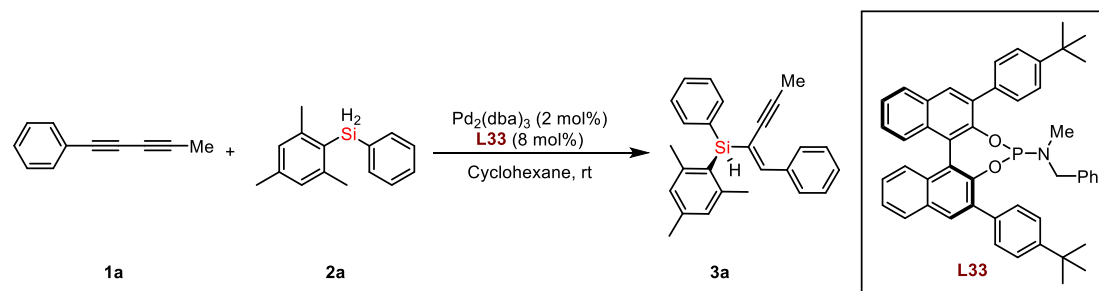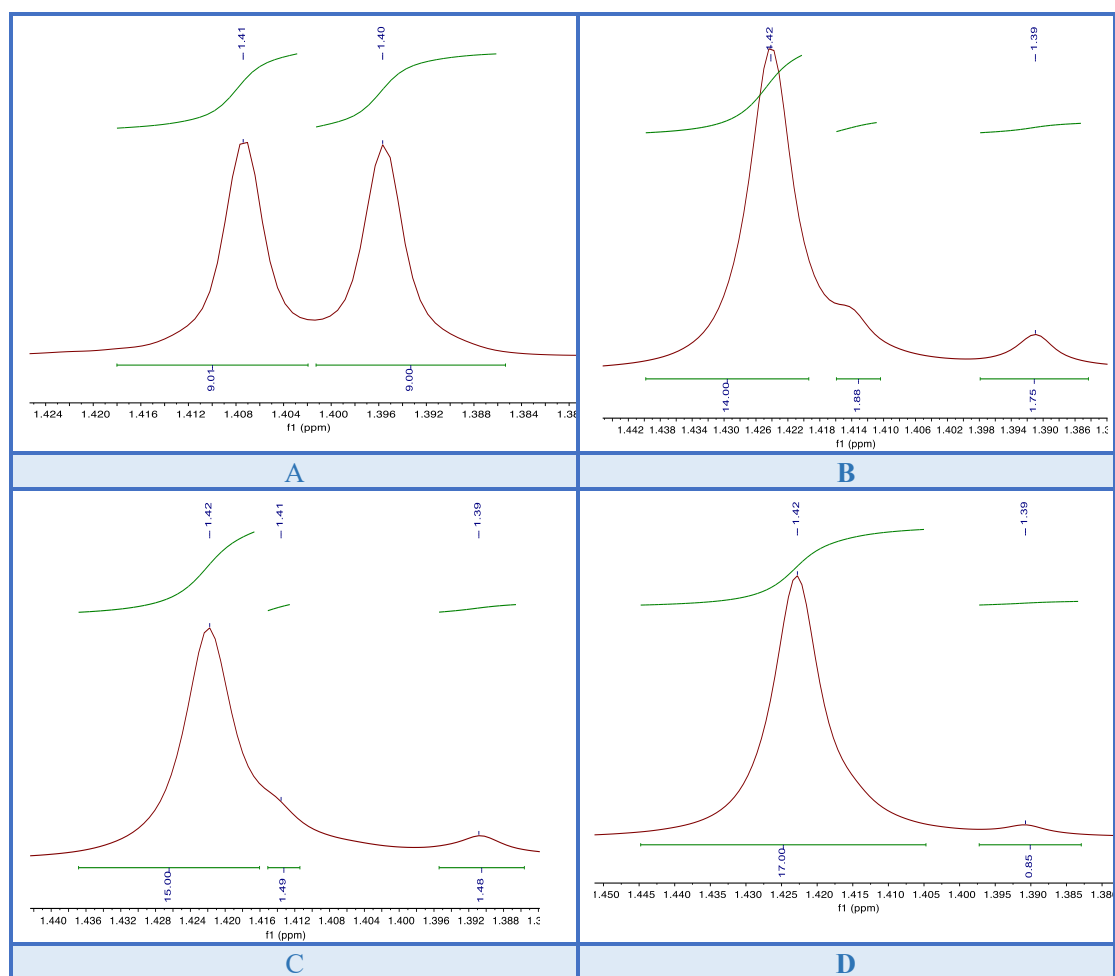

**Figure S8.**  $^1\text{H}$  NMR (A) L33; (B)  $\text{Pd}_2(\text{dba})_3 + \text{L33} + 2\text{a}$ , stir 1 h; (C)  $\text{Pd}_2(\text{dba})_3 + \text{L33} + 1\text{a} + 2\text{a}$ , stir 1 h; (D)  $\text{Pd}_2(\text{dba})_3 + \text{L33} + 1\text{a} + 2\text{a}$ , stir 18 h.

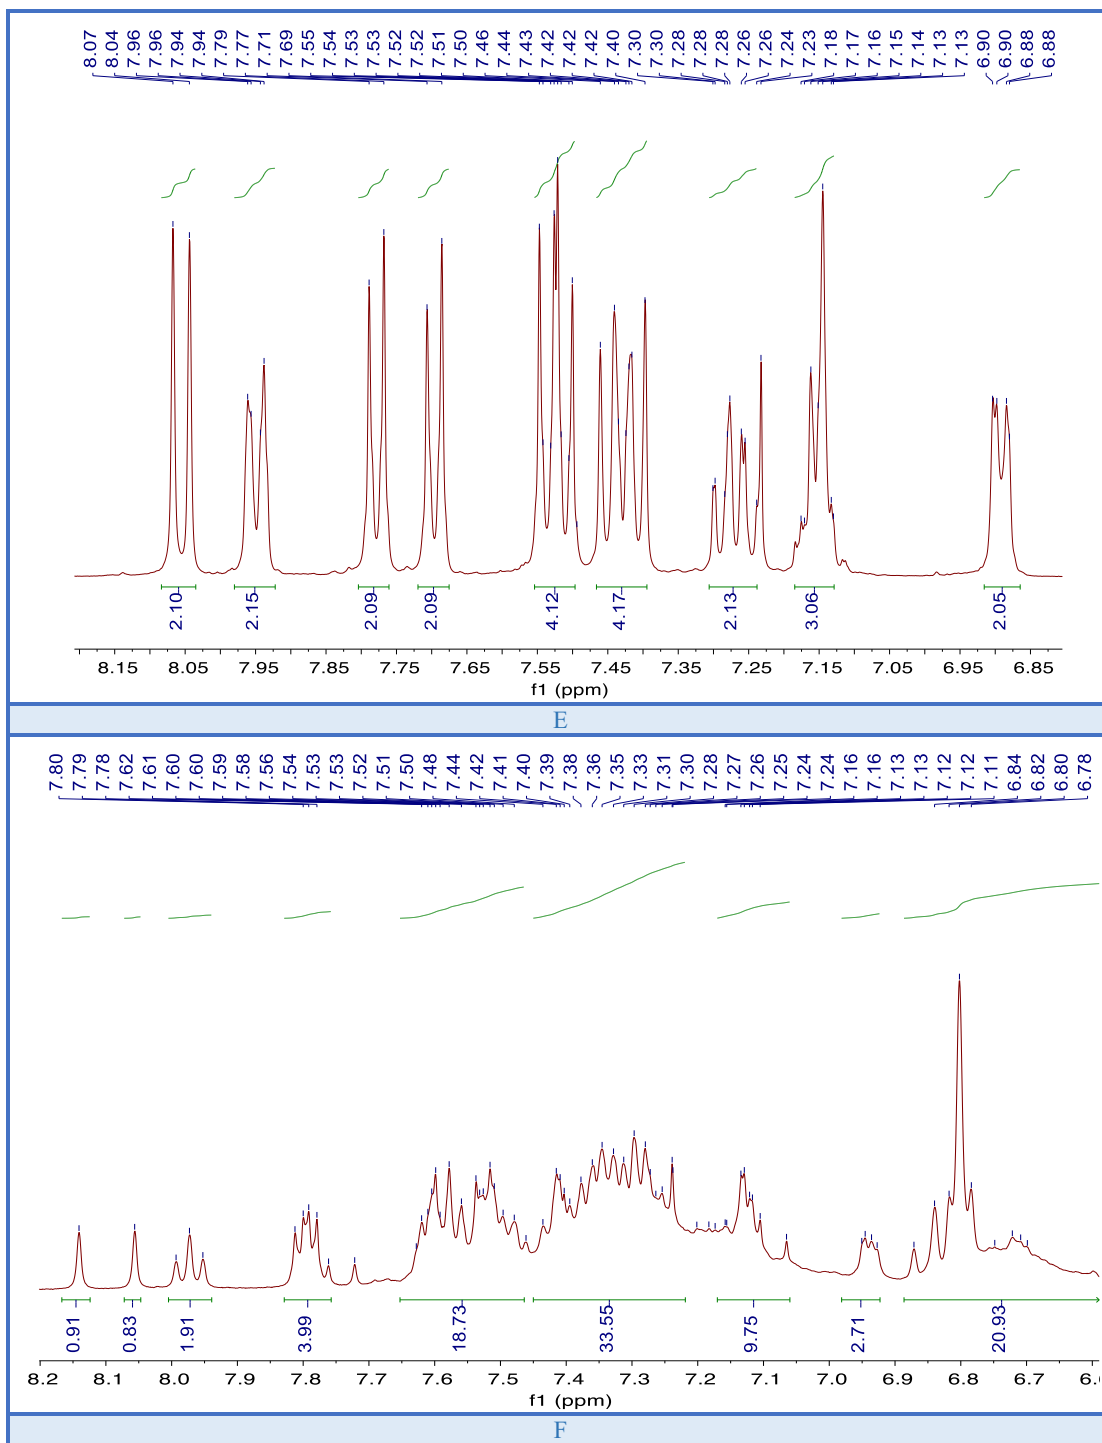

**Figure S9.**  $^1\text{H}$  NMR (E) L33; (F)  $\text{Pd}_2(\text{dba})_3 + \text{L33} + \text{2a}$ , stir 1 h.

### 3.6.6 The determination of product-promoted palladium catalysis (autocatalysis) by chirality matching between chiral additive (3a) and chiral ligand in the Pd-catalyzed hydrosilylation

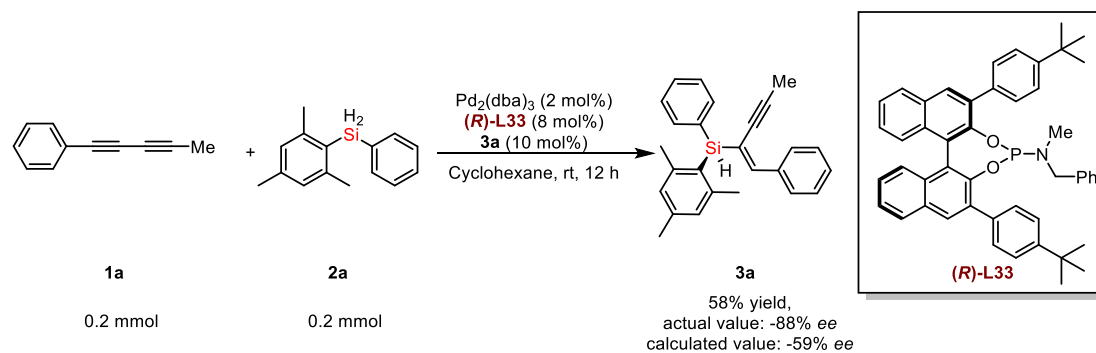

|                        | Ratio of <b>3</b> | <i>R</i> | <i>S</i> |
|------------------------|-------------------|----------|----------|
| <i>(R)</i> - <b>3a</b> | 48%               | 95.5     | 4.5      |
| <i>(S)</i> - <b>3a</b> | 10%               | 4        | 97       |

method of calculated value :  $48\% \times 95.5 + 10\% \times 4 : 48\% \times 4.5 + 10\% \times 97$   
 79.6 : 20.4

### 3.6.7 CD Spectra

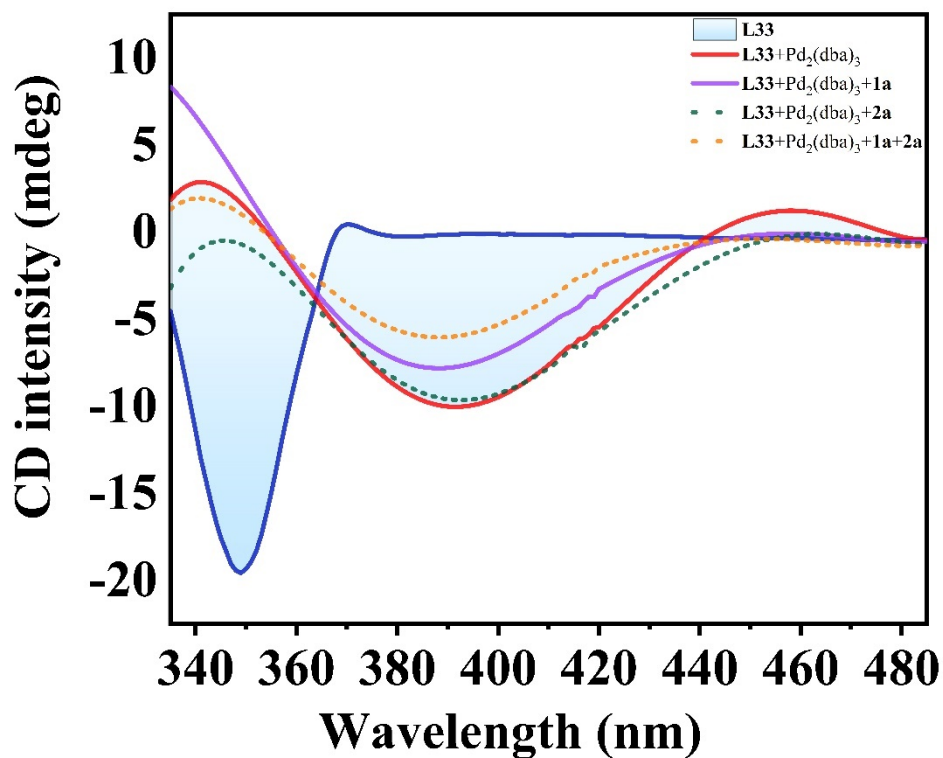

**Figure S10.** Circular dichroism spectroscopy analysis CD ( $1.00 \times 10^{-2}$  mol/L) intensity spectra of the Pd-catalyzed hydrosilylation of **1a**.

### 3.6.8 UV Spectra

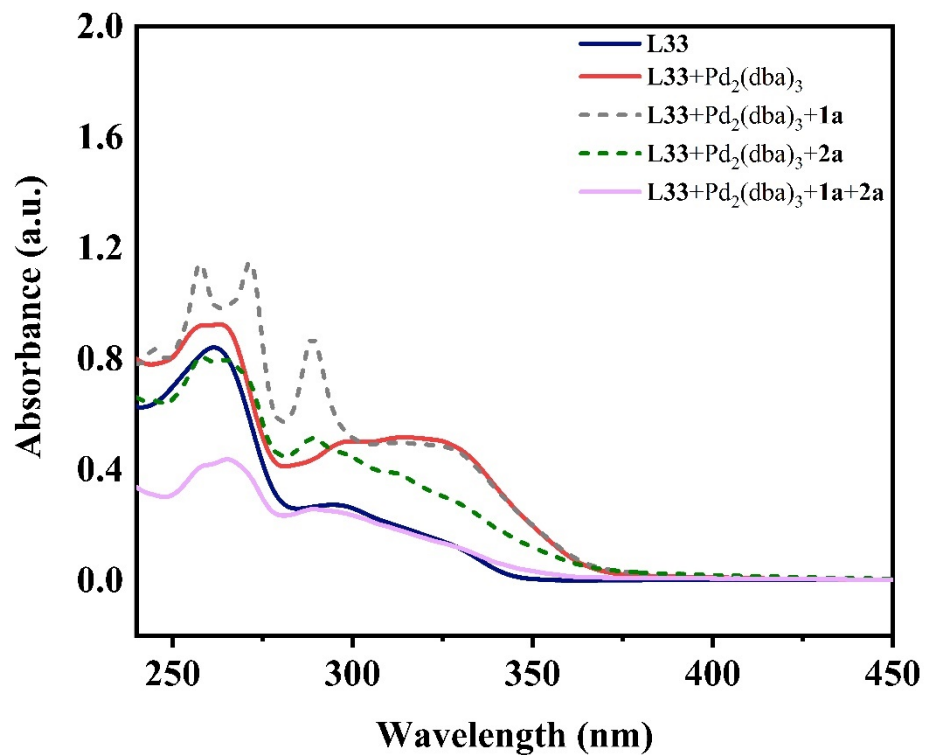

**Figure S11.** 2D UV-vis absorption spectrum of L33, Pd<sub>2</sub>(dba)<sub>3</sub>, 1a and 2a in CHCl<sub>3</sub> ( $2.5 \times 10^{-5}$  mol/L).

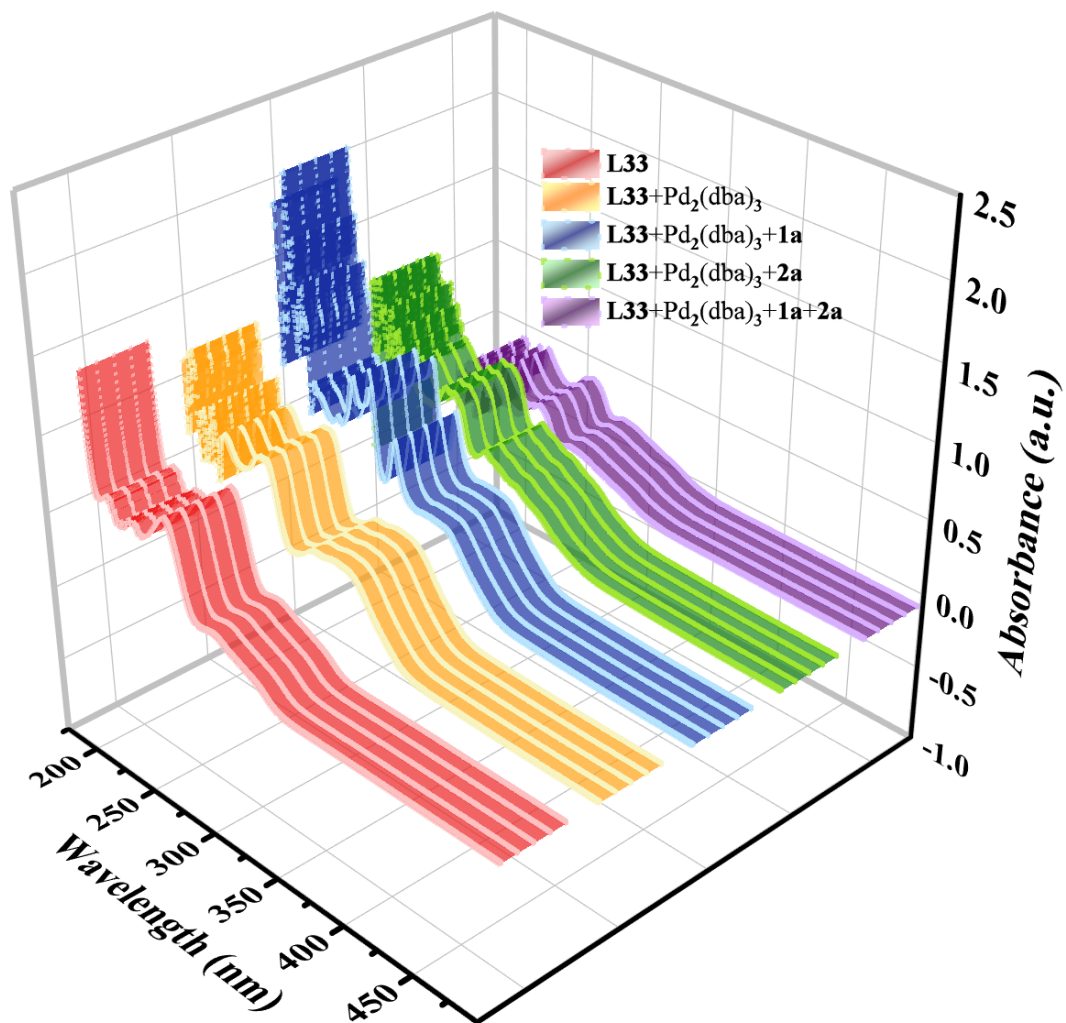

**Figure S12.** 3D UV-vis absorption spectrum of **L33**,  $\text{Pd}_2(\text{dba})_3$ , **1a** and **2a** in  $\text{CHCl}_3$  ( $2.5 \times 10^{-5}$  mol/L).

### 3.6.9 Pd-nanoparticles catalyzed hydrosilylation<sup>[7]</sup>

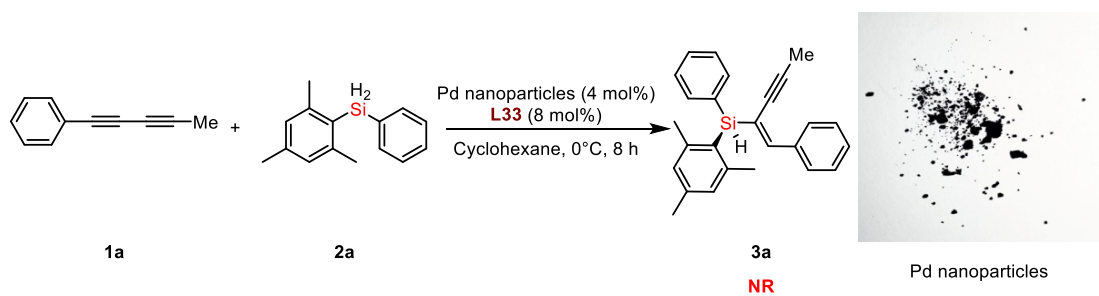

### 3.7 X-Ray Structure of 3ab

Single crystals of **3ab** were obtained by recrystallization from PE/EA. The molecular structure and X-ray diffraction data/refinement of **3ab** were shown below

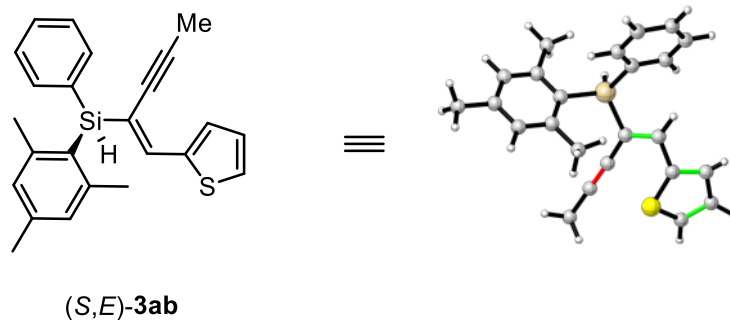

(CCDC 2209523)

| Empirical formula                                | C <sub>48</sub> H <sub>48</sub> S <sub>2</sub> Si <sub>2</sub> |
|--------------------------------------------------|----------------------------------------------------------------|
| Formula weight                                   | 745.16                                                         |
| Temperature                                      | 293(2) K                                                       |
| Crystal system                                   | Monoclinic                                                     |
| space group                                      | P2(1)                                                          |
| a/Å                                              | 9.1046(7)                                                      |
| b/Å                                              | 7.8073(6)                                                      |
| c/Å                                              | 15.4040(11)                                                    |
| α/°                                              | 90                                                             |
| β/°                                              | 101.618                                                        |
| γ/°                                              | 90                                                             |
| Volume/ Å <sup>3</sup>                           | 1072.53(14)                                                    |
| Z                                                | 1                                                              |
| Calculated density mg/m <sup>3</sup>             | 1.154                                                          |
| Absorption coefficient mm <sup>-1</sup>          | 1.886                                                          |
| F(000)                                           | 396                                                            |
| Crystal size/ mm <sup>3</sup>                    | 0.120 x 0.120 x 0.110                                          |
| Theta range for data collection/°                | 2.929 to 67.169 deg.                                           |
| Limiting indices                                 | -10<=h<=6, -9<=k<=8, -18<=l<=17                                |
| Reflections collected / unique                   | 3868 / 2808 [R(int) = 0.0257                                   |
| Completeness to theta                            | 99.6 %                                                         |
| Refinement method                                | Full-matrix least-squares on F <sup>2</sup>                    |
| Data / restraints / parameters                   | 2808 / 1 / 243                                                 |
| Goodness-of-fit on F <sup>2</sup>                | 0.995                                                          |
| Final R indices [I>2σ(I)]                        | R1 = 0.0412, wR2 = 0.1002                                      |
| R indices (all data)                             | R1 = 0.0483, wR2 = 0.1058                                      |
| Absolute structure parameter                     | 0.04(2)                                                        |
| Extinction coefficient                           | n/a                                                            |
| Largest diff. peak and hole / e. Å <sup>-3</sup> | 0.142 and -0.209                                               |

### 3.8 Synthesis of Polydiyne **9** by Pd-catalyzed Hydrosilylation

#### 3.8.1 Preparation of Polydiyne **8**

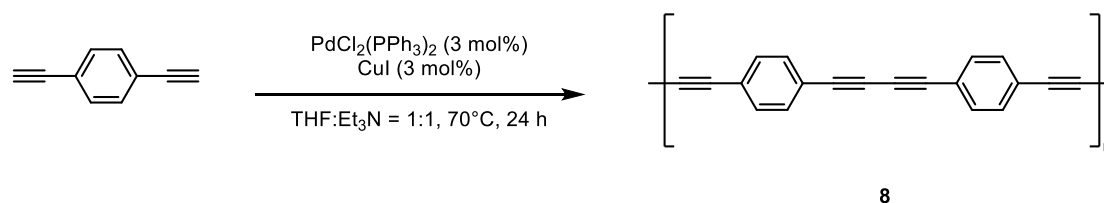

A flame dried 25 mL Schlenk tube, 1,4-diethynylbenzene (252 mg, 2 mmol), Pd(PPh<sub>3</sub>)<sub>2</sub>Cl<sub>2</sub> (41 mg, 3 mol%) and CuI (11 mg, 3 mol%) were dissolved in the mixture of THF (2 mL) and Et<sub>3</sub>N (2 mL). The mixture solution was heated to 70 °C and stirred 24 h. After that, the mixture was cooled to temperature and washed 3 times with methanol, chloroform and acetone. Being dried in vacuum for overnight at 70 °C to give 344 mg of product **8**.

#### 3.8.2 Pd-catalyzed Hydrosilylation of Polydiyne **8**

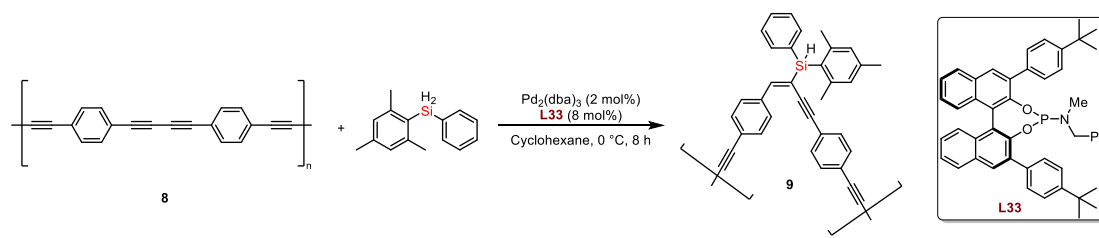

In a flame dried Schlenk tube, Pd<sub>2</sub>(dba)<sub>3</sub> (1.8 mg, 0.003 mmol, 2 mol%), **L33** (5.6 mg, 0.008 mmol, 8 mol%) in Cyclohexane (1 mL, 0.2M) was stirred at room temperature for 30 min under nitrogen atmosphere. Then **8** (0.1 mmol, 1 equiv.), dihydrosilanes (0.1 mmol, 1 equiv.) were added sequentially to the reaction mixture, and the reaction tube was cooled for 8 h at 0 °C. After completion of the reaction, the mixture was warmed to temperature and washed with methanol and chloroform. The product 15 mg of product **9** was dried in vacuum.



### 3.8.3 CD Spectra of Polyenyne 9

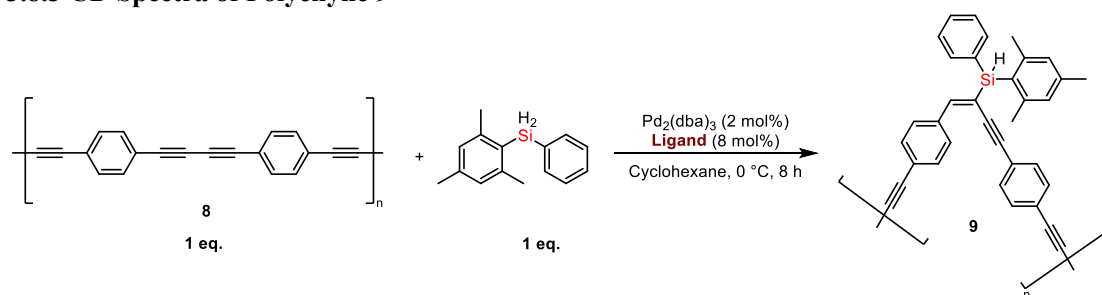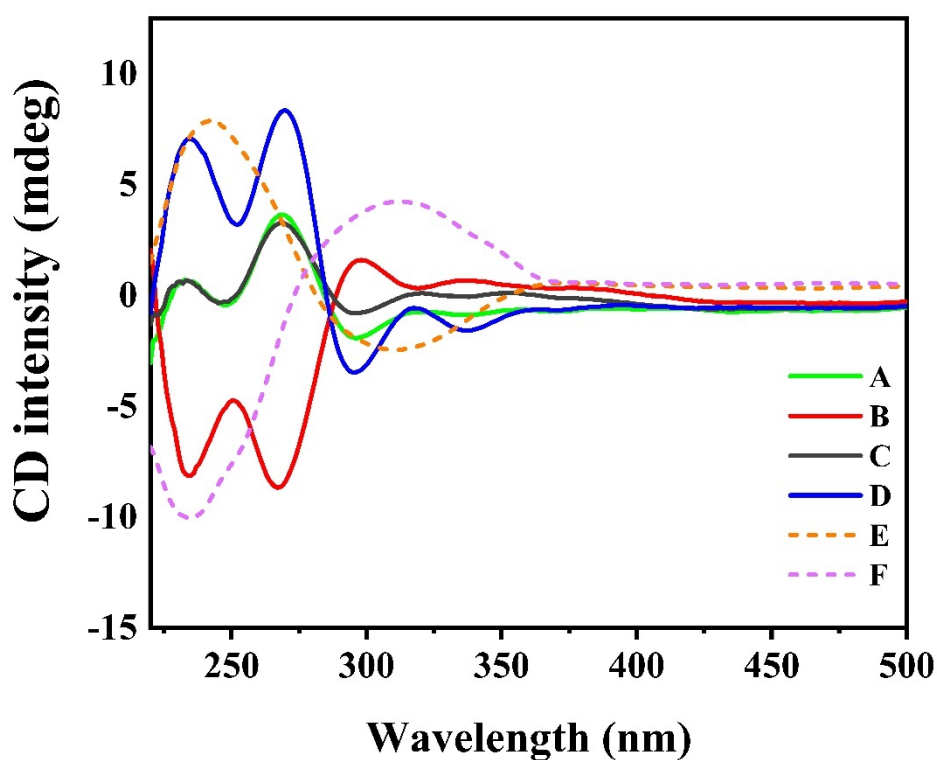

**Figure S13.** Circular dichroism spectroscopy analysis intensity spectra of (A) a diluted THF solution of the **9** with (*S*)-**L33** (2 g/L in THF); (B) a diluted THF solution of the **9** with (*R*)-**L33** (2 g/L in THF); (C) a diluted THF solution of the the **9** with (*S*)-**L33** and 0.5 eq. [Si-H] (2 g/L in THF); (D) a diluted THF solution of the the **9** with (*S*)-**L14** (2 g/L in THF); (E) a diluted THF solution of the (*R*)-**3q** (0.3 g/L in THF); (F) a diluted THF solution of the (*S*)-**3q** (0.3 g/L in THF).

### 3.8.4 FTIR spectra

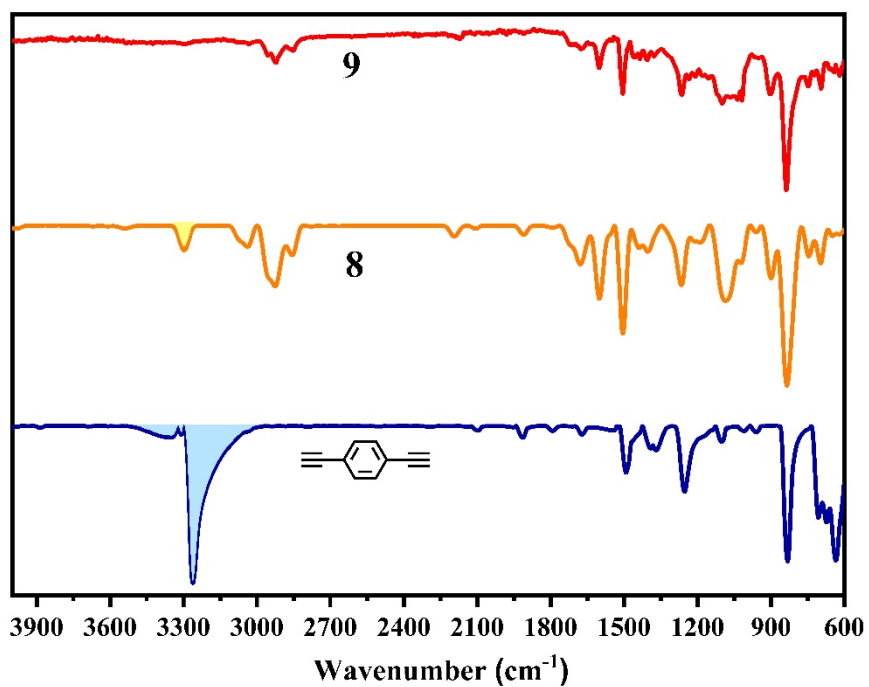

**Figure S14.** FTIR spectra of pyrolysis products of 1,4-Diethynylbenzene, **8** and **9**.  
1,4-Diethynylbenzene(area): 3.07; **8** (area): 57.62.  $M_w = 4736$ .

### 3.8.5 SEM images

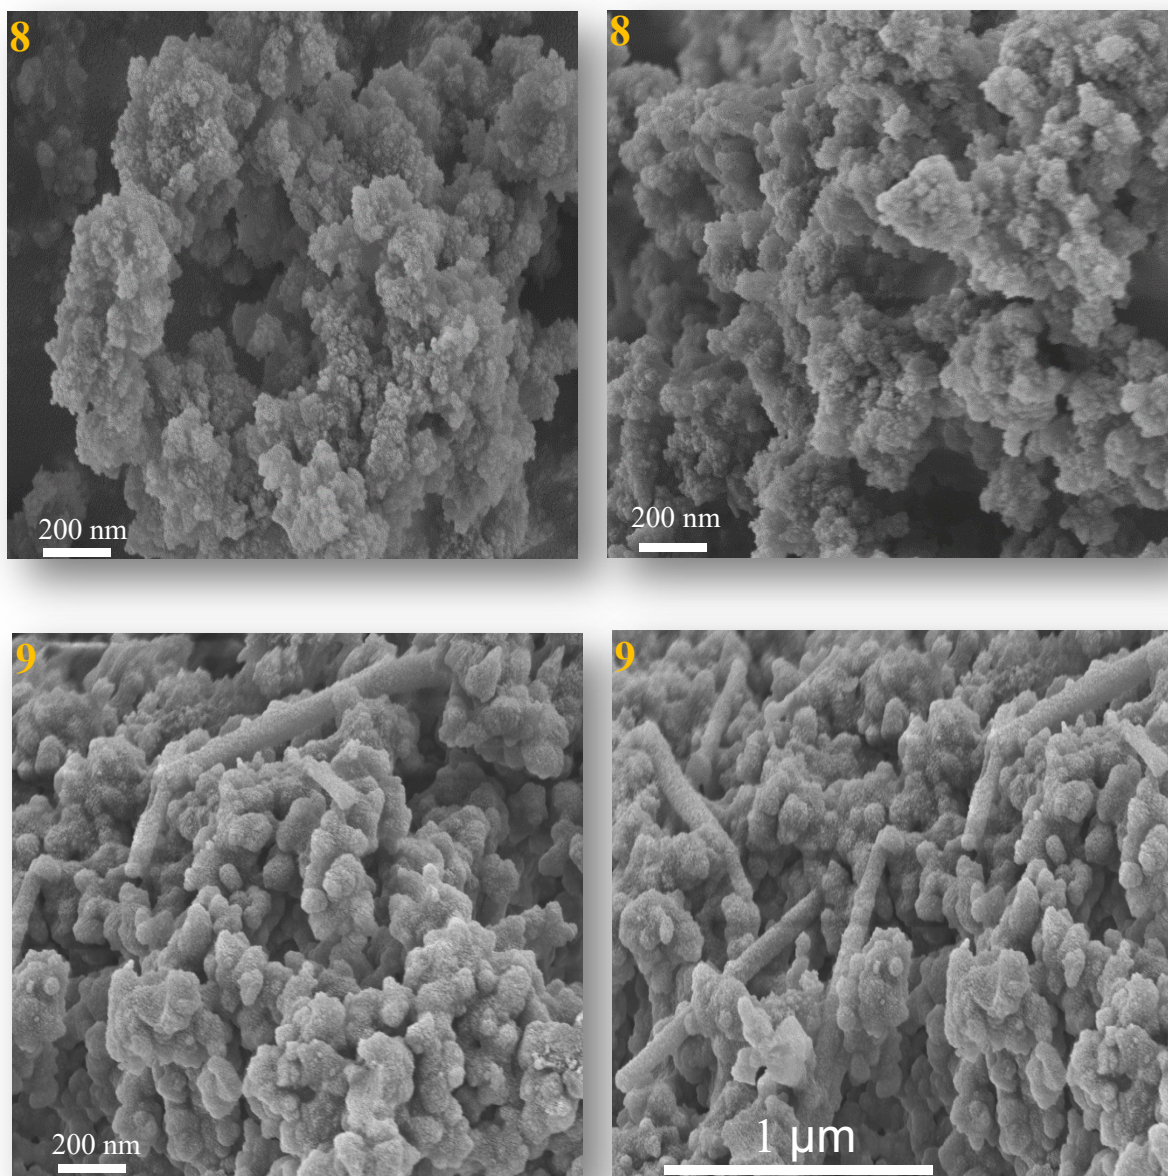

**Figure S15.** SEM images of **8** and **9**.

### 3.8.6 TG Analysis of Polydiyne 8 and Polyenyne 9

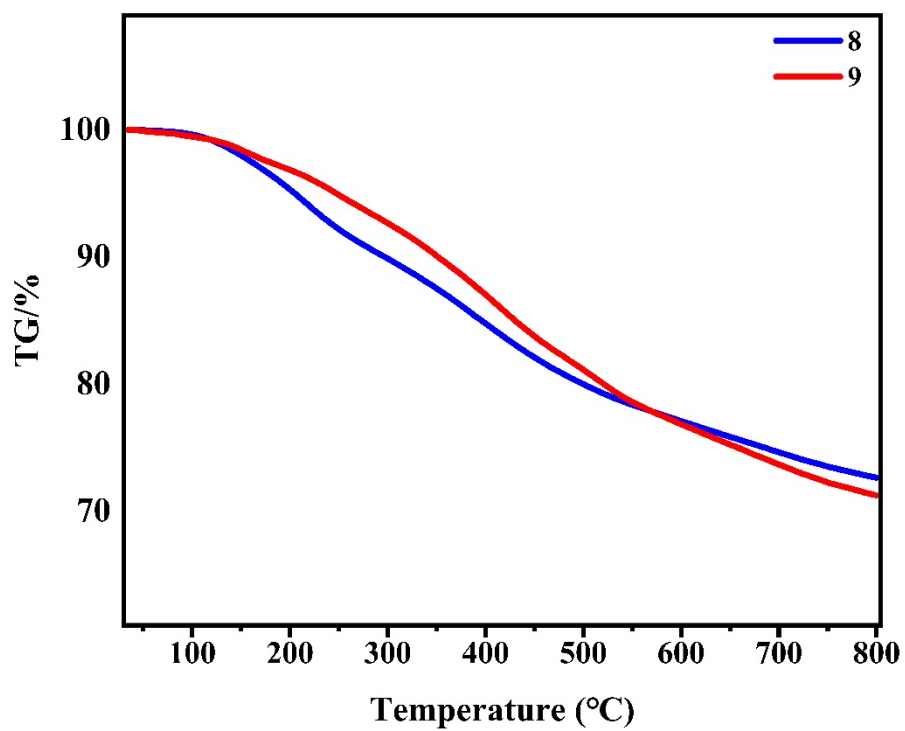

**Figure S16.** TG (solid line) curves of **8** and **9** with a heating rate of  $10\text{ }^{\circ}\text{C min}^{-1}$  under  $\text{N}_2$ .

## 4 NMR Spectra

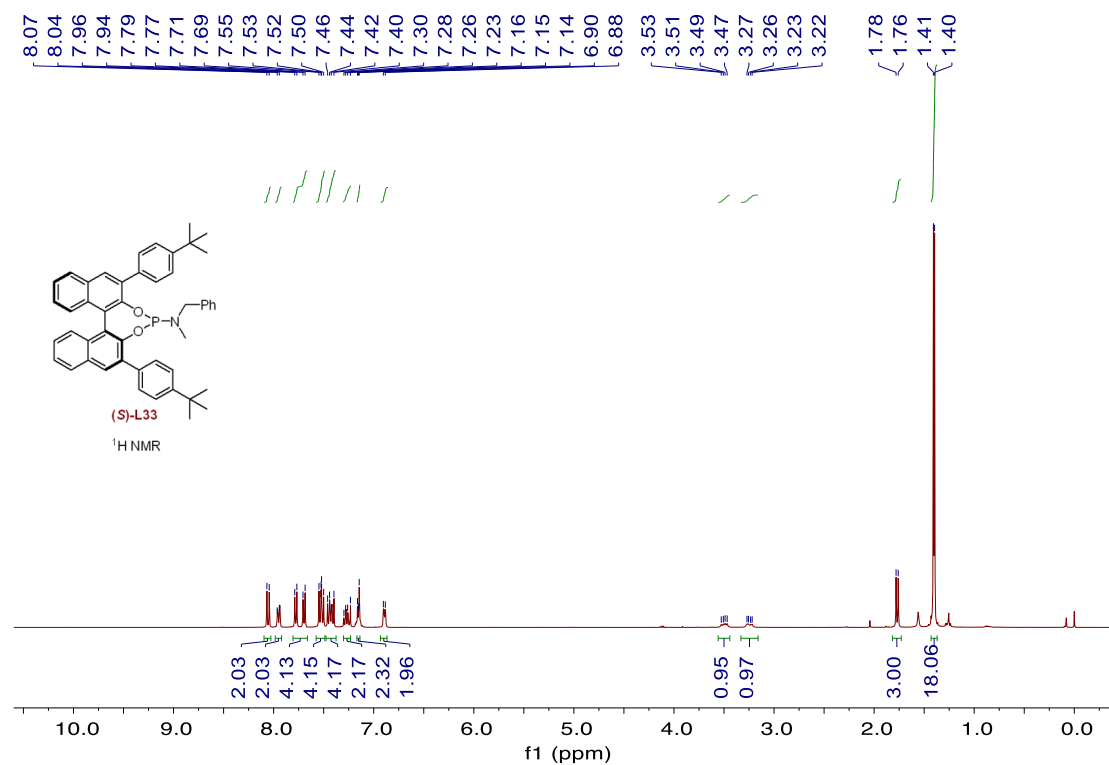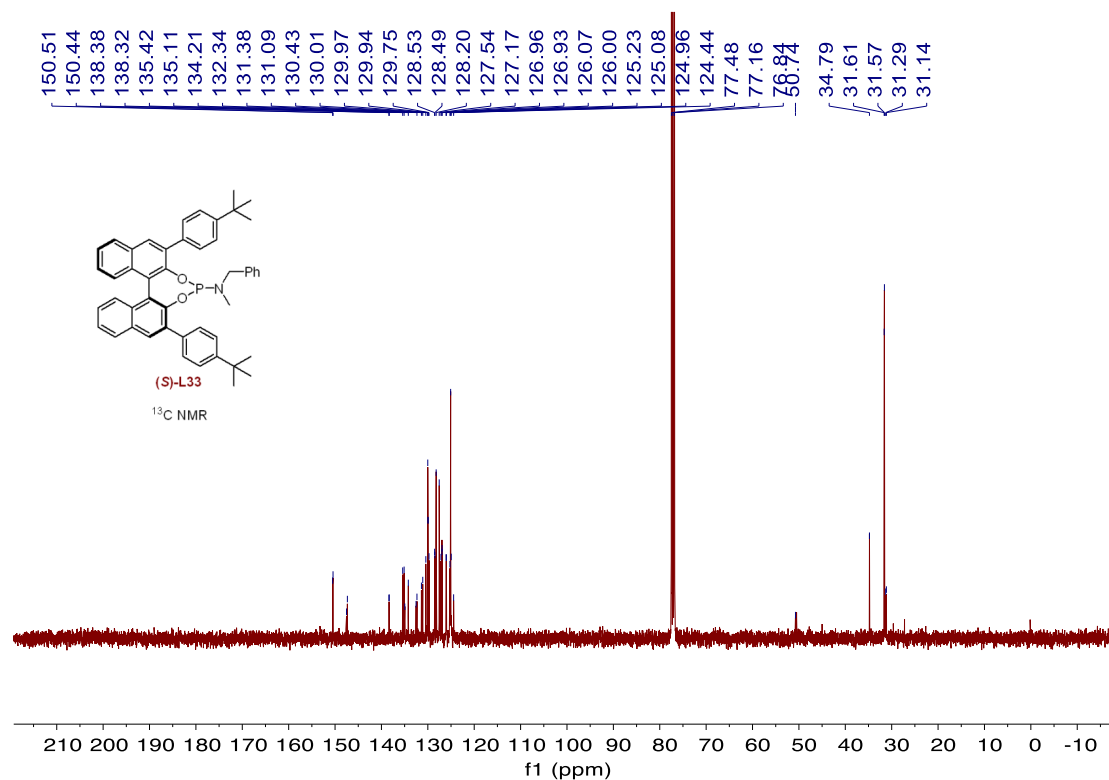



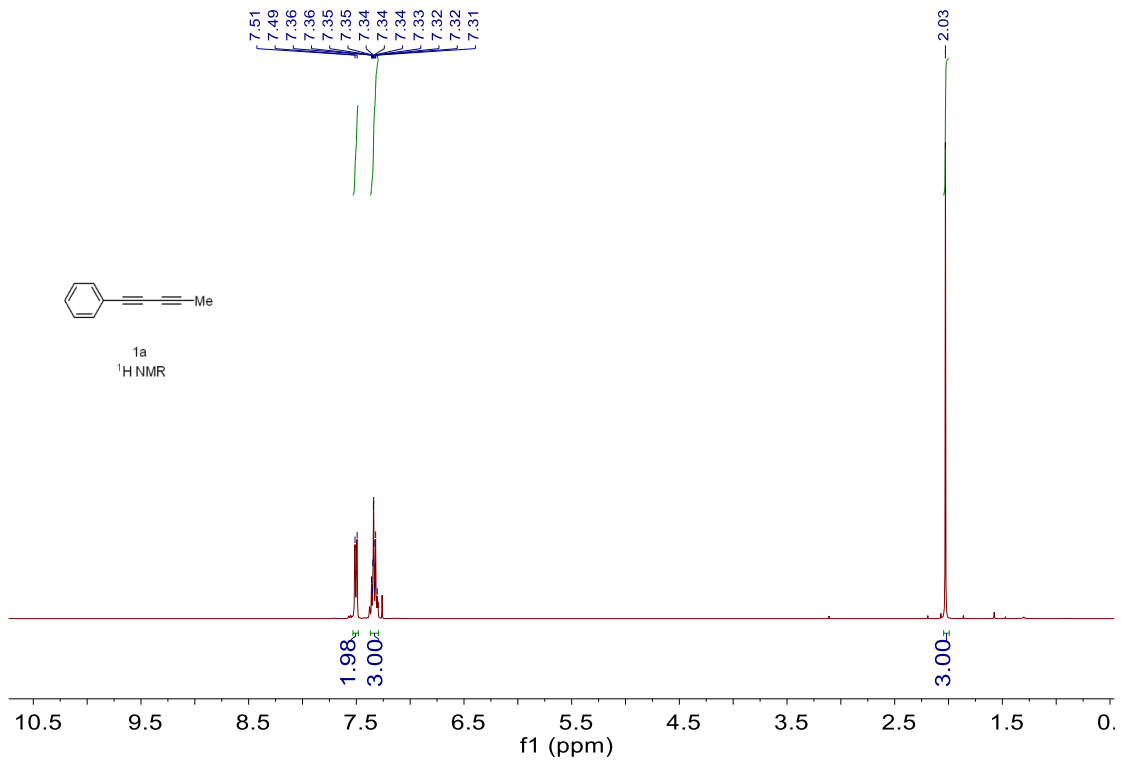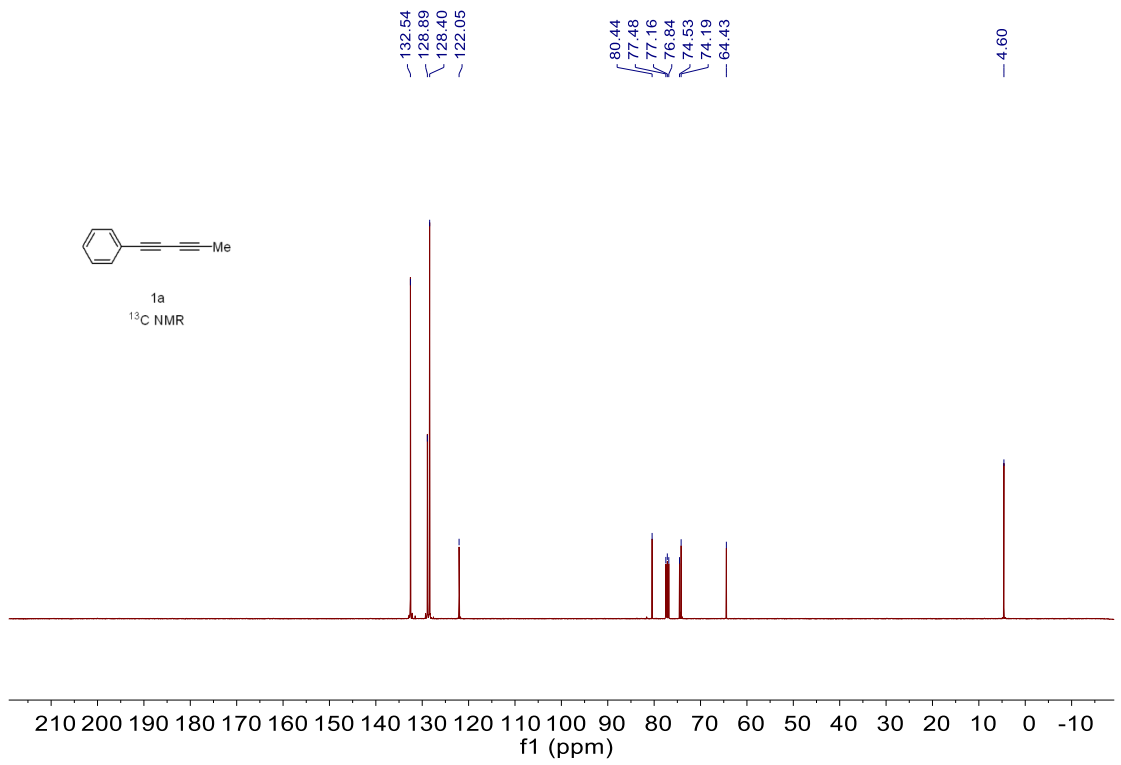

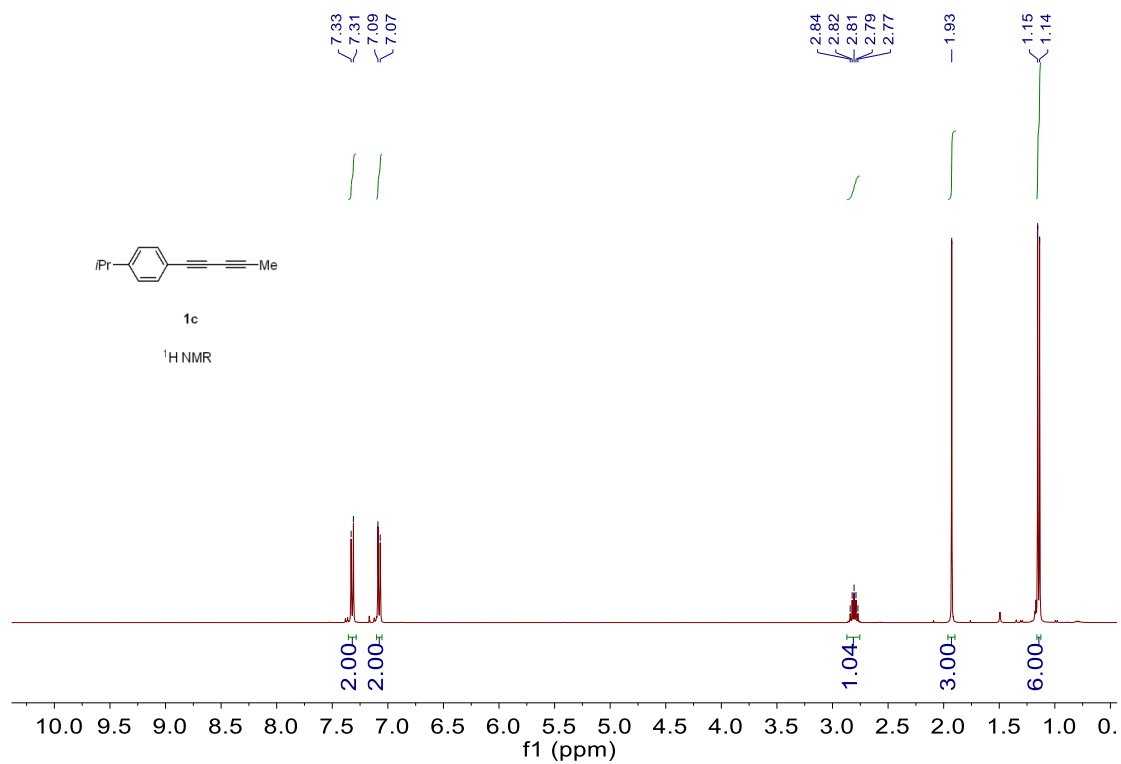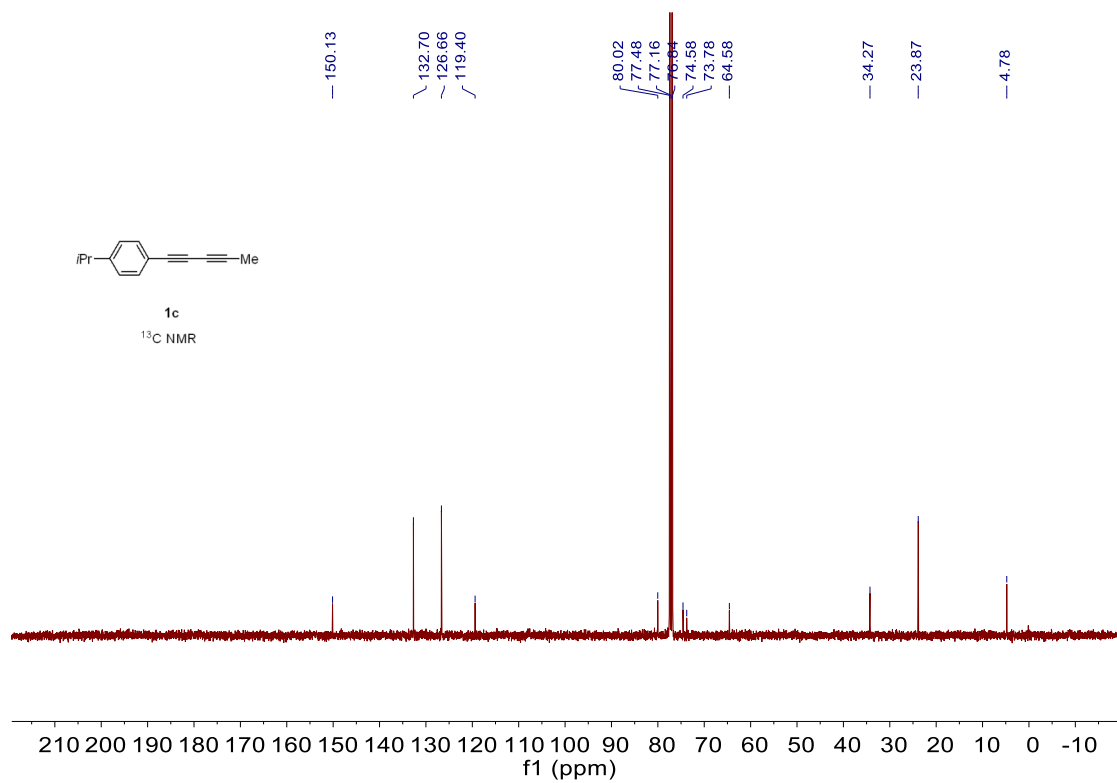



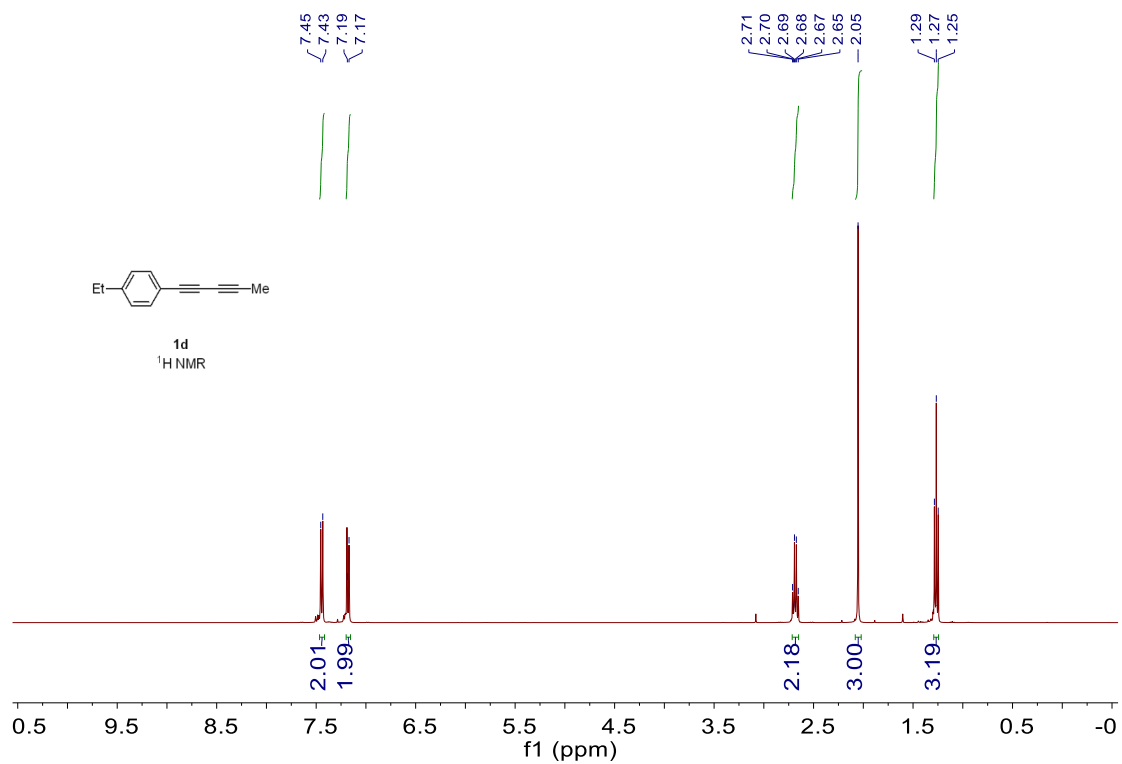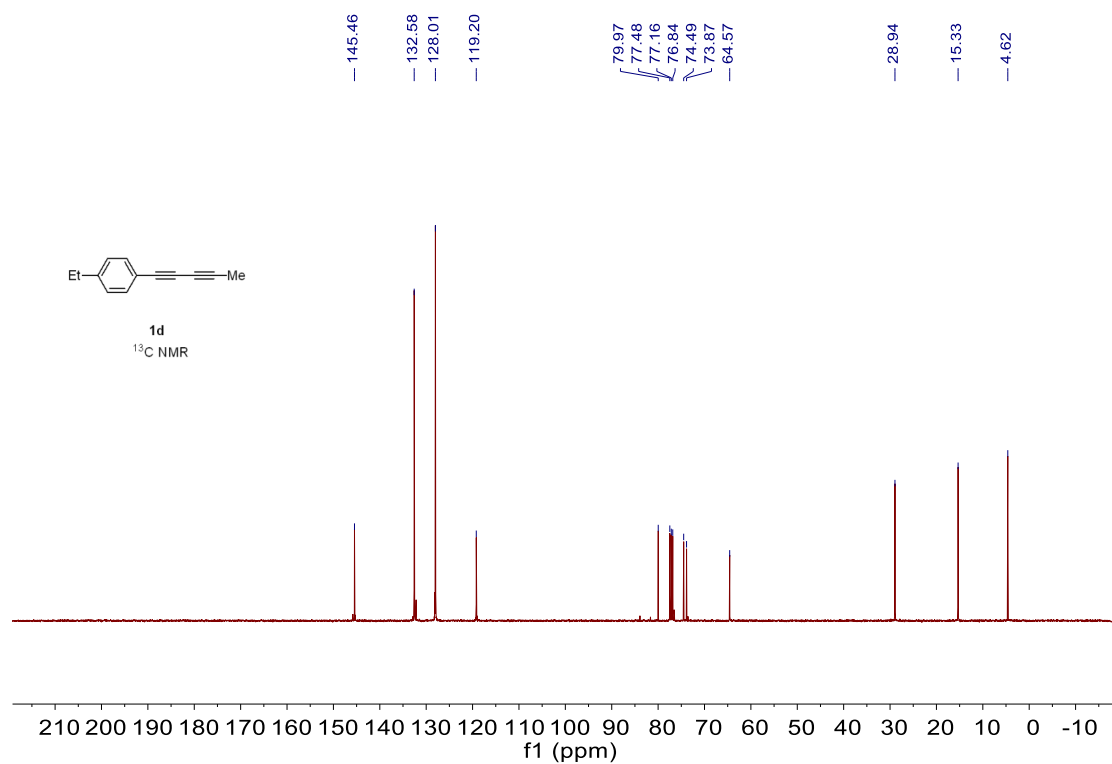

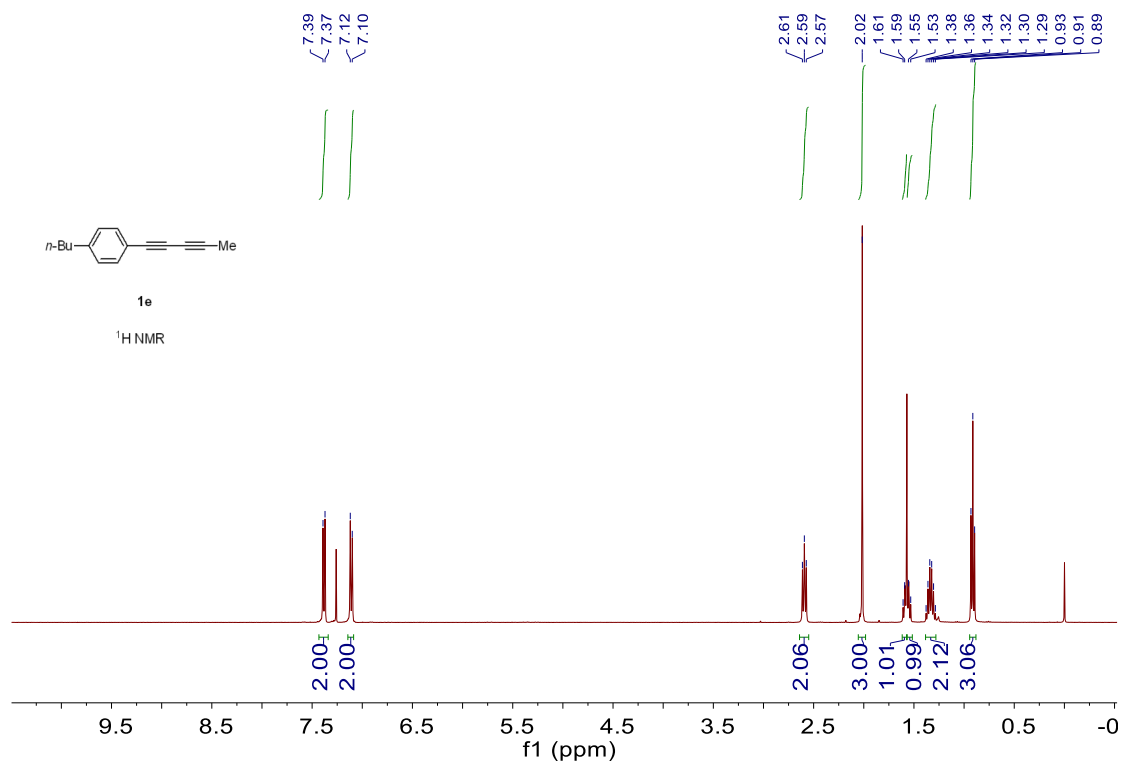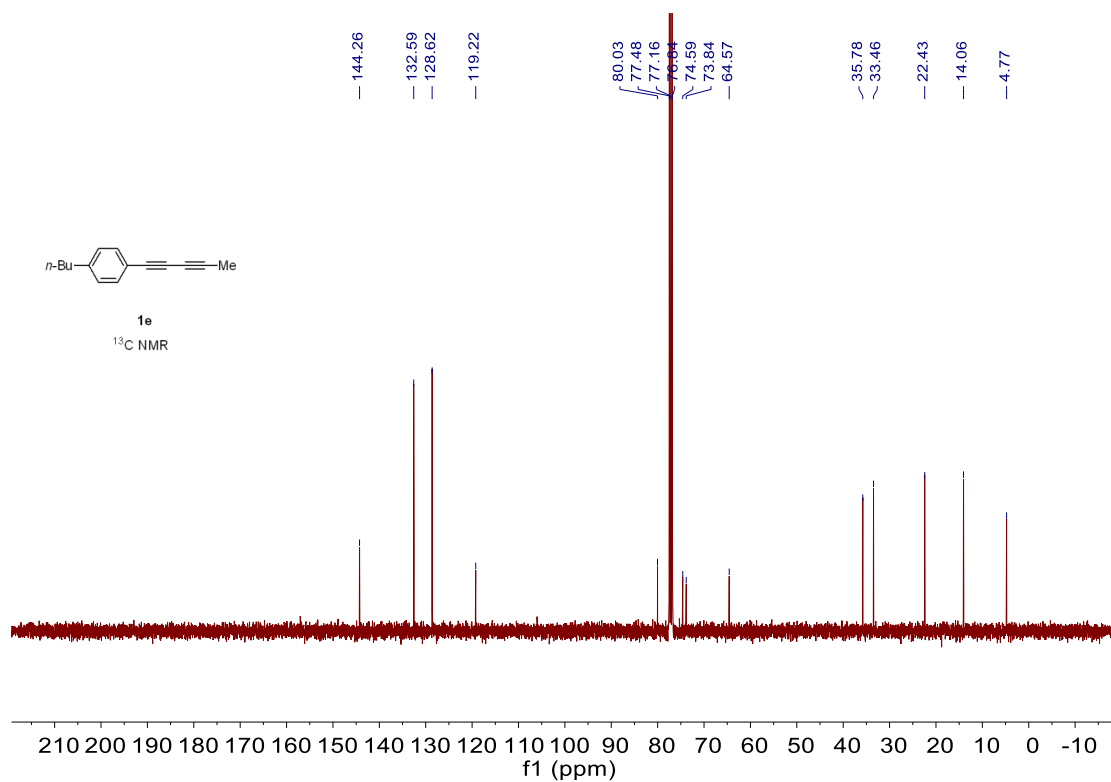

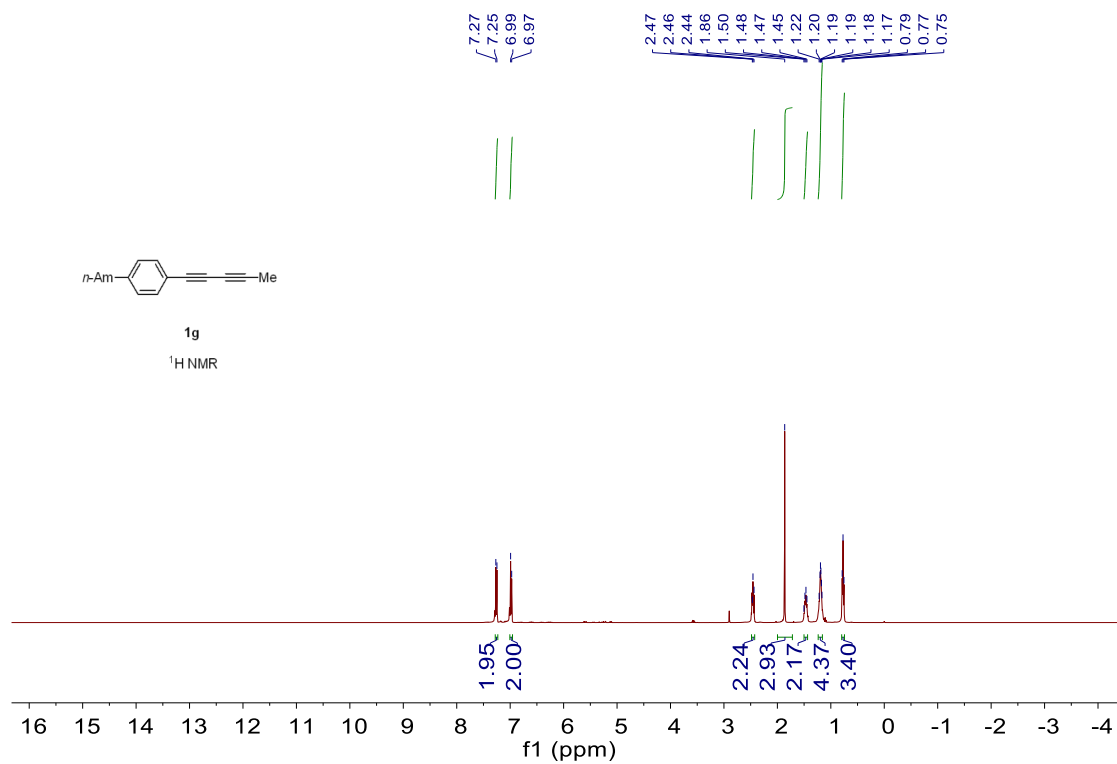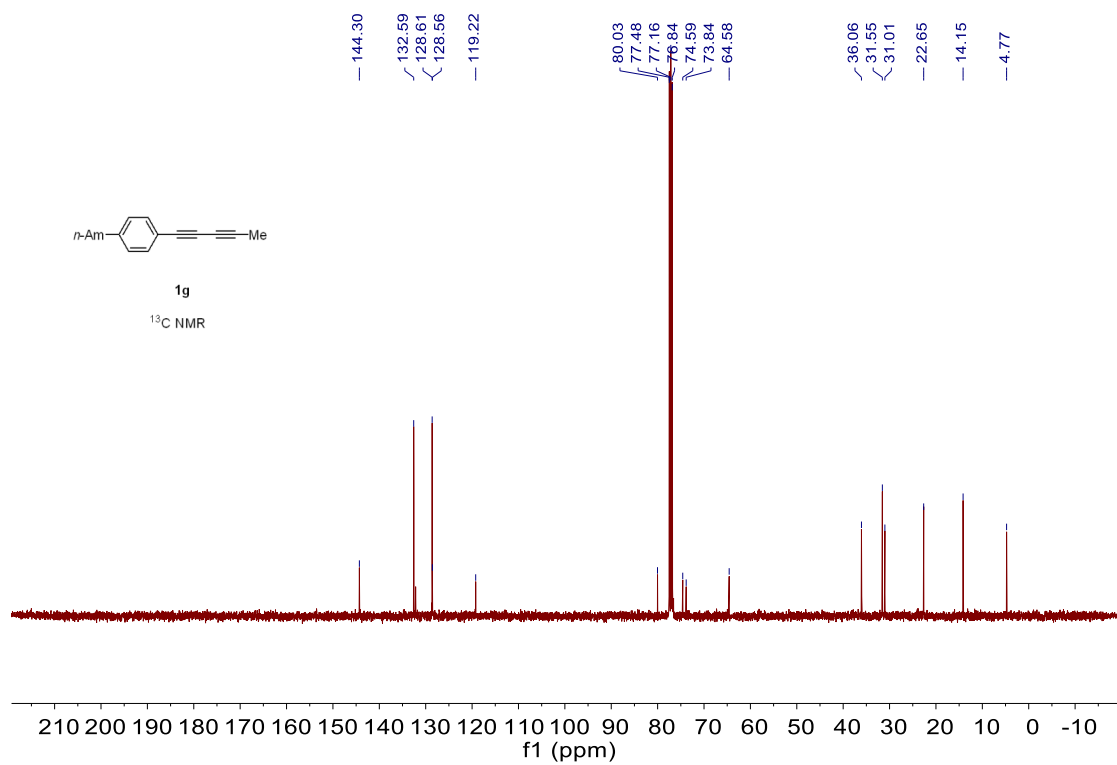

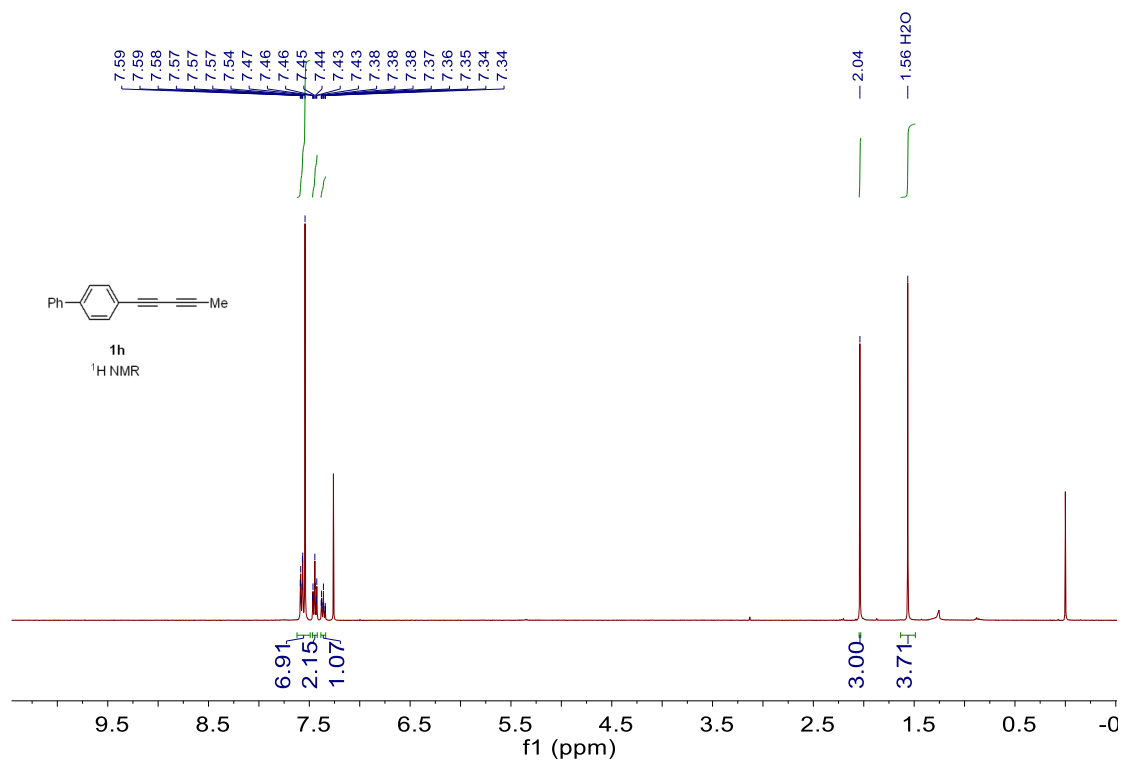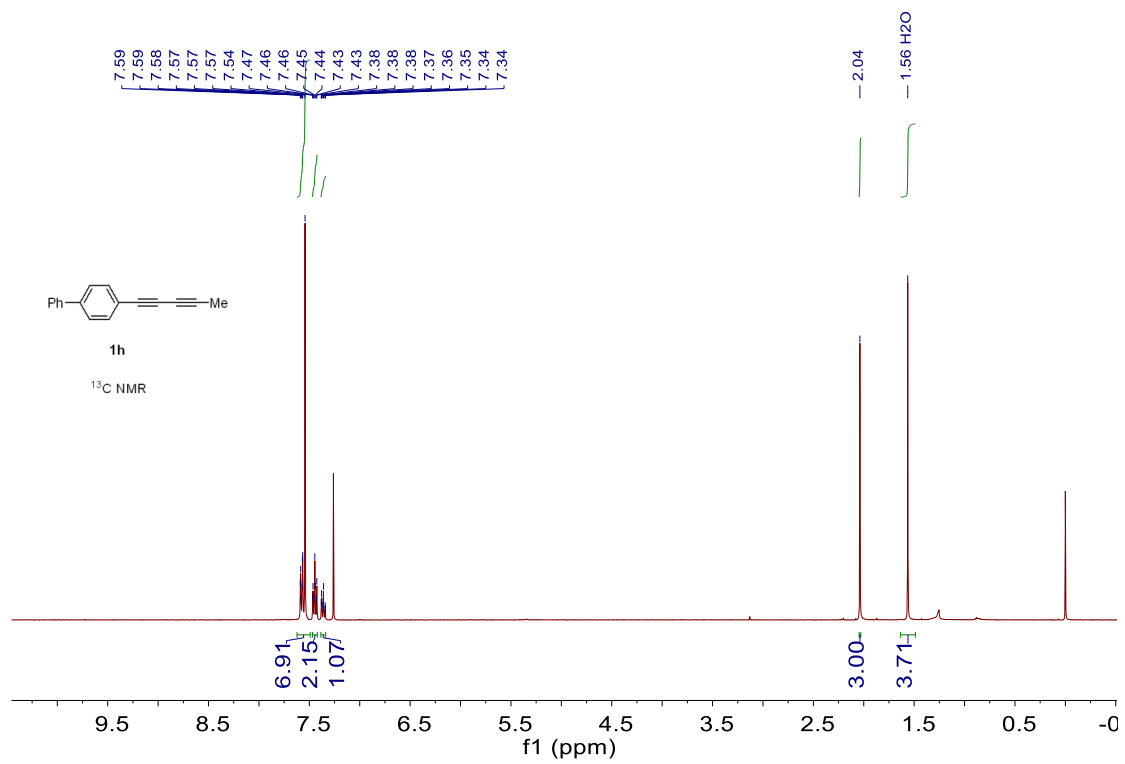

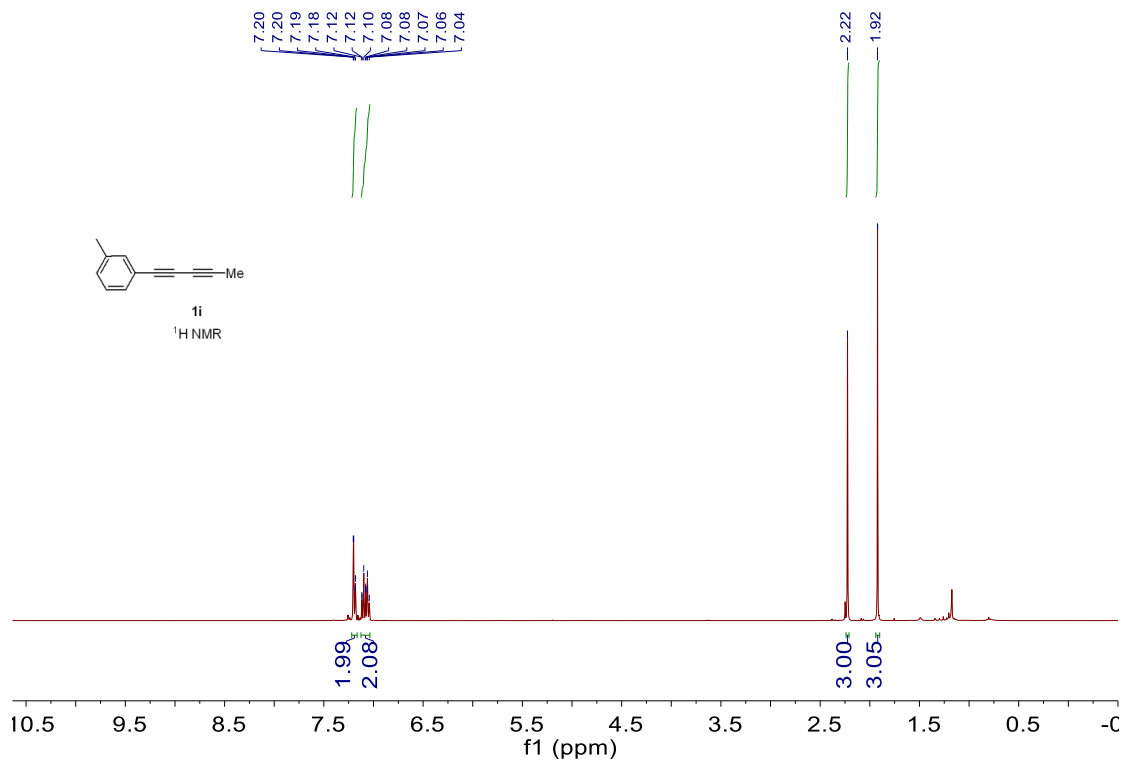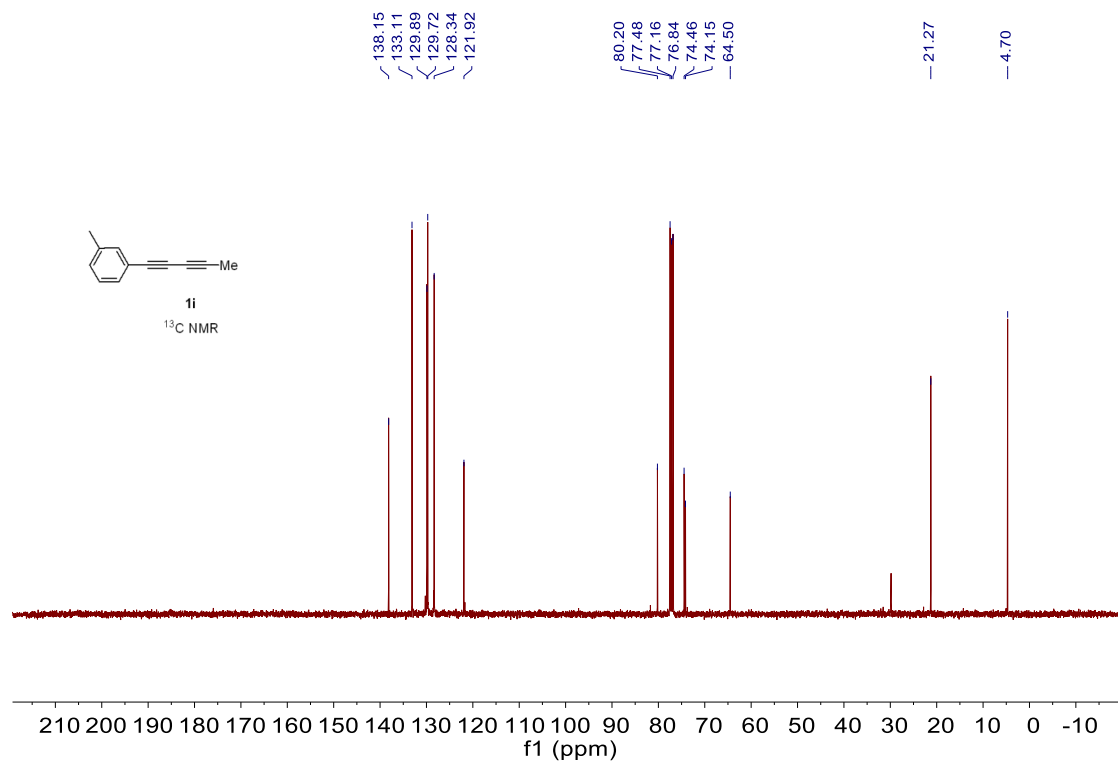

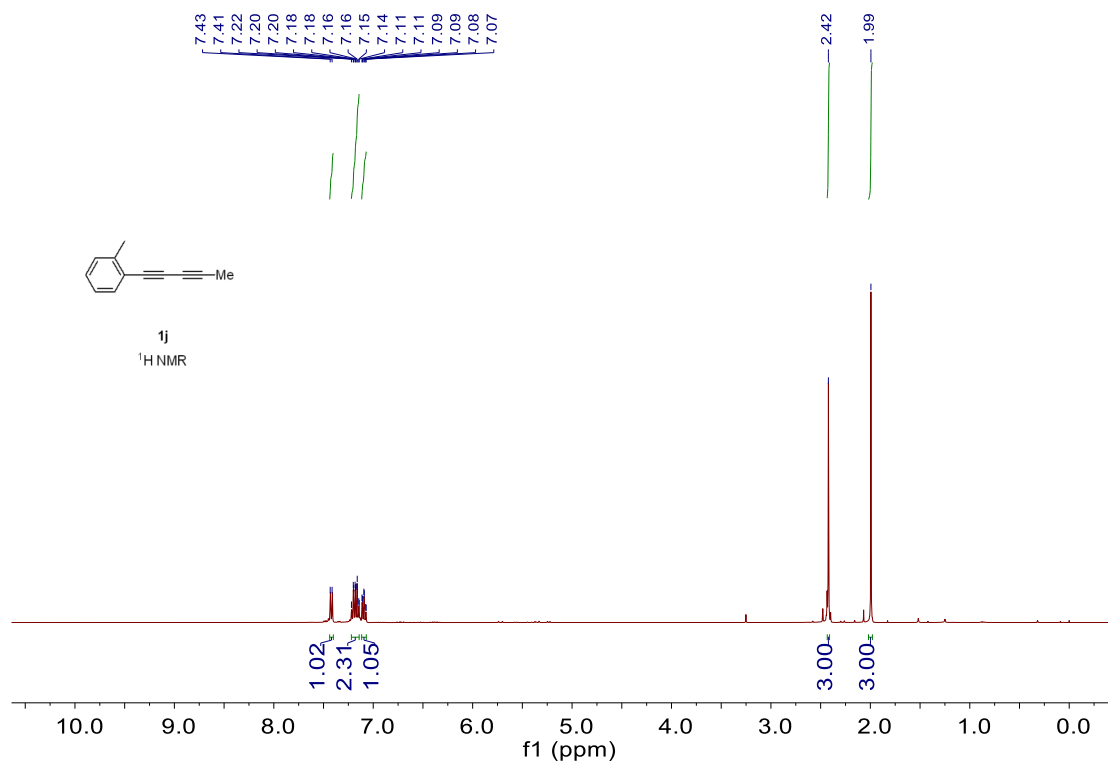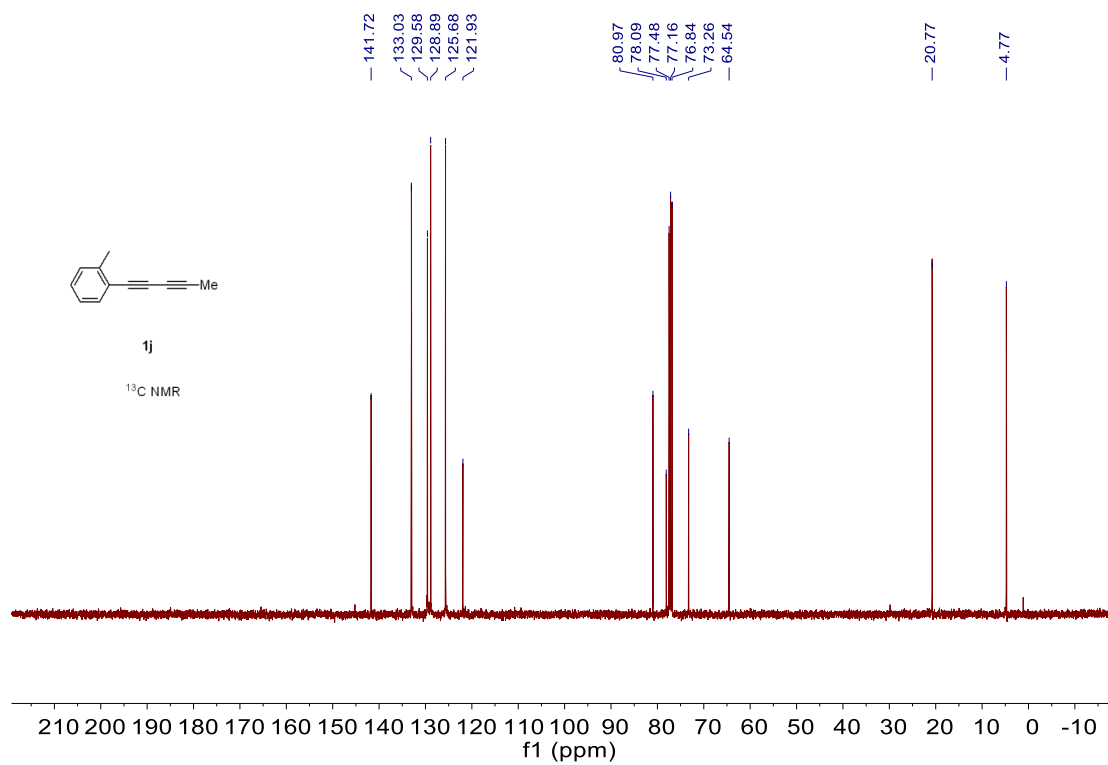

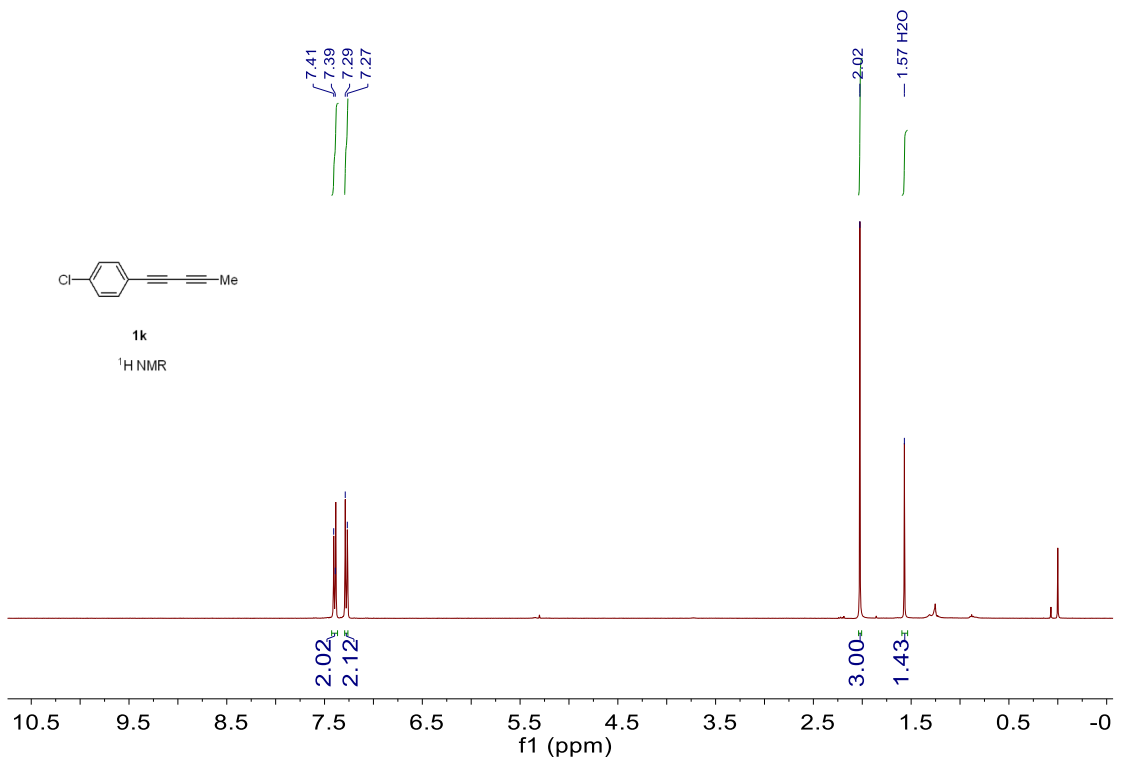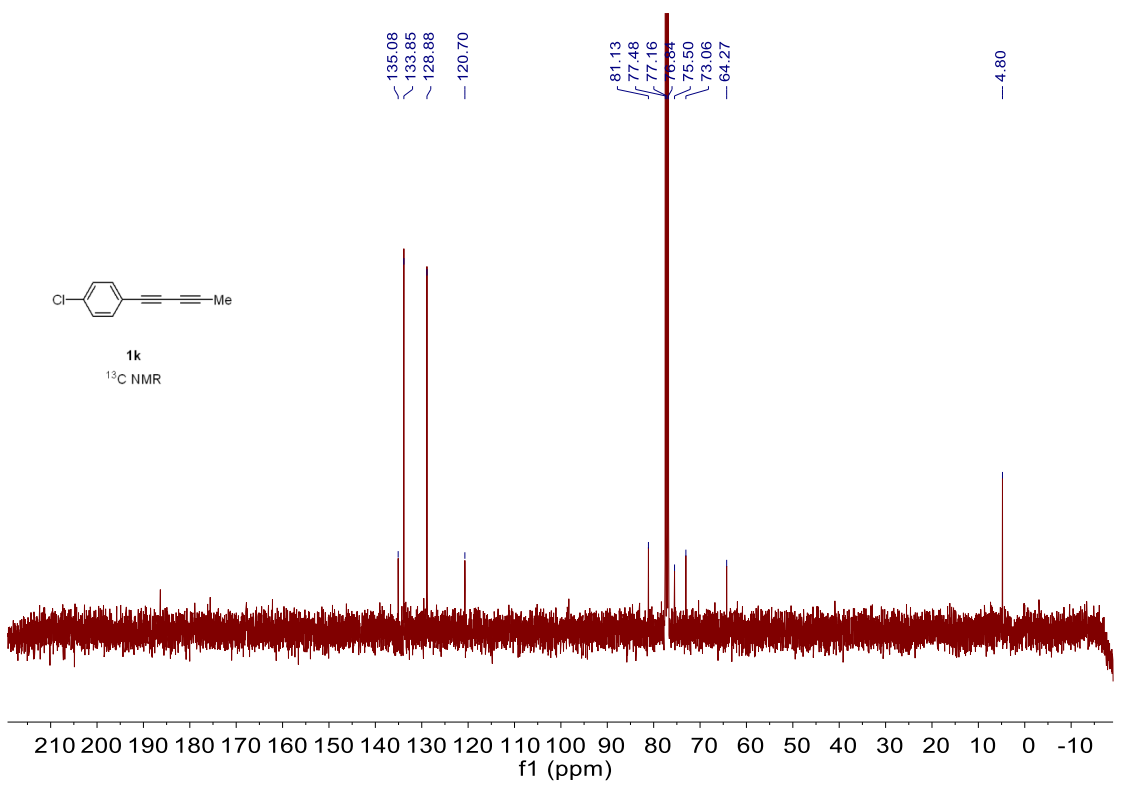

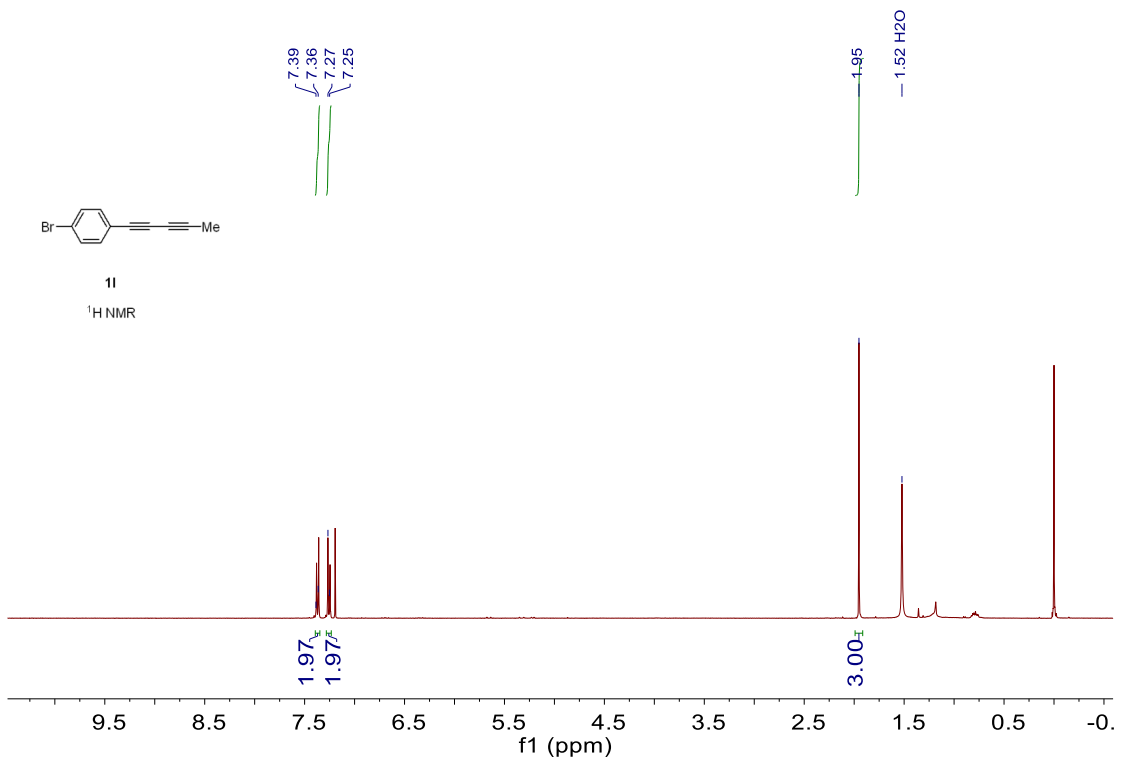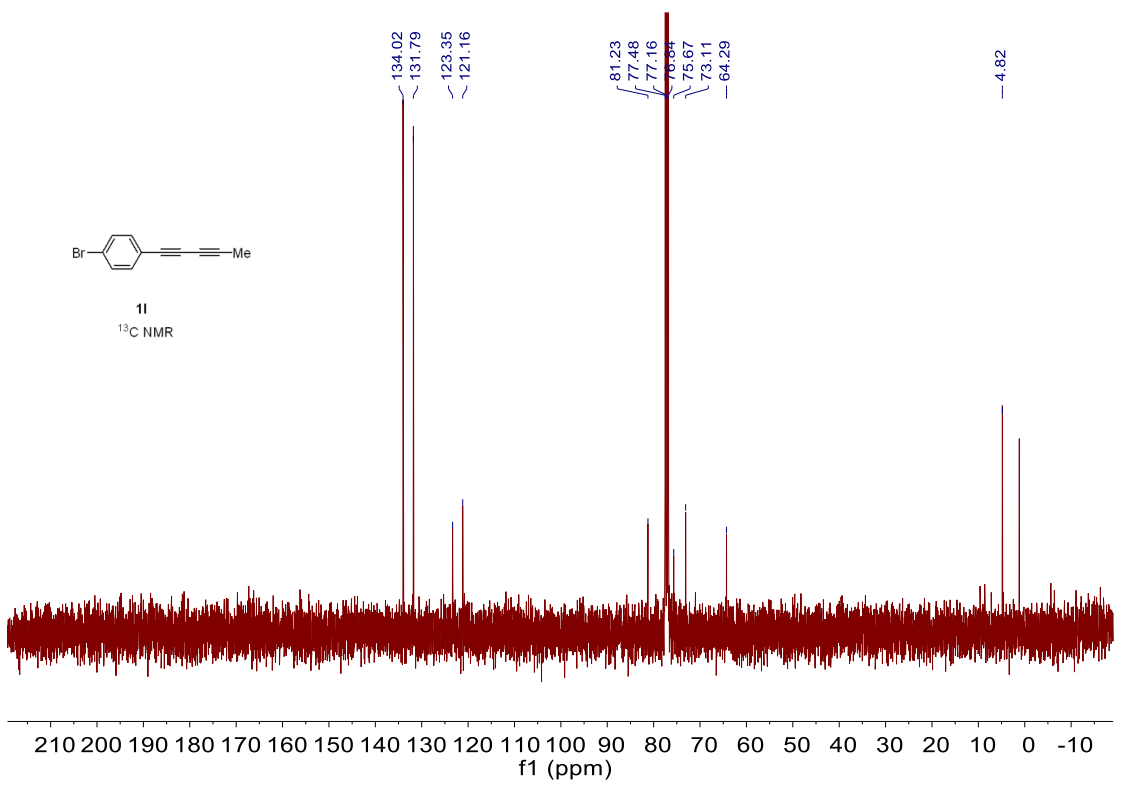



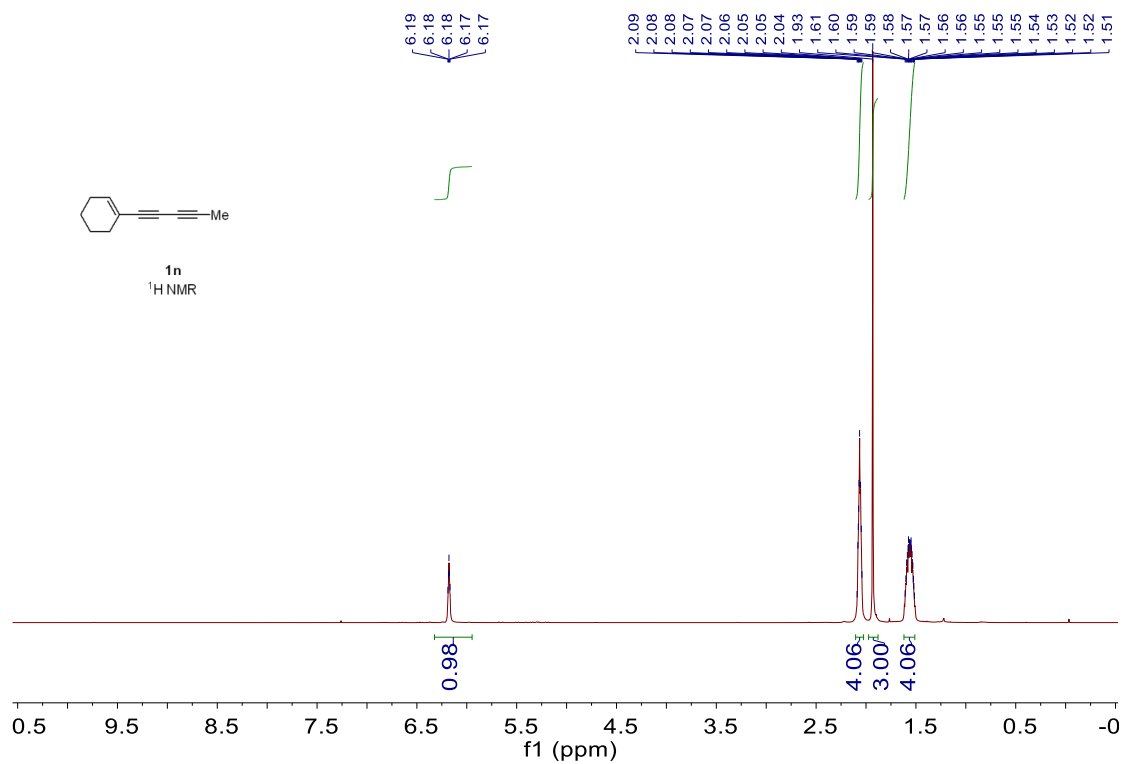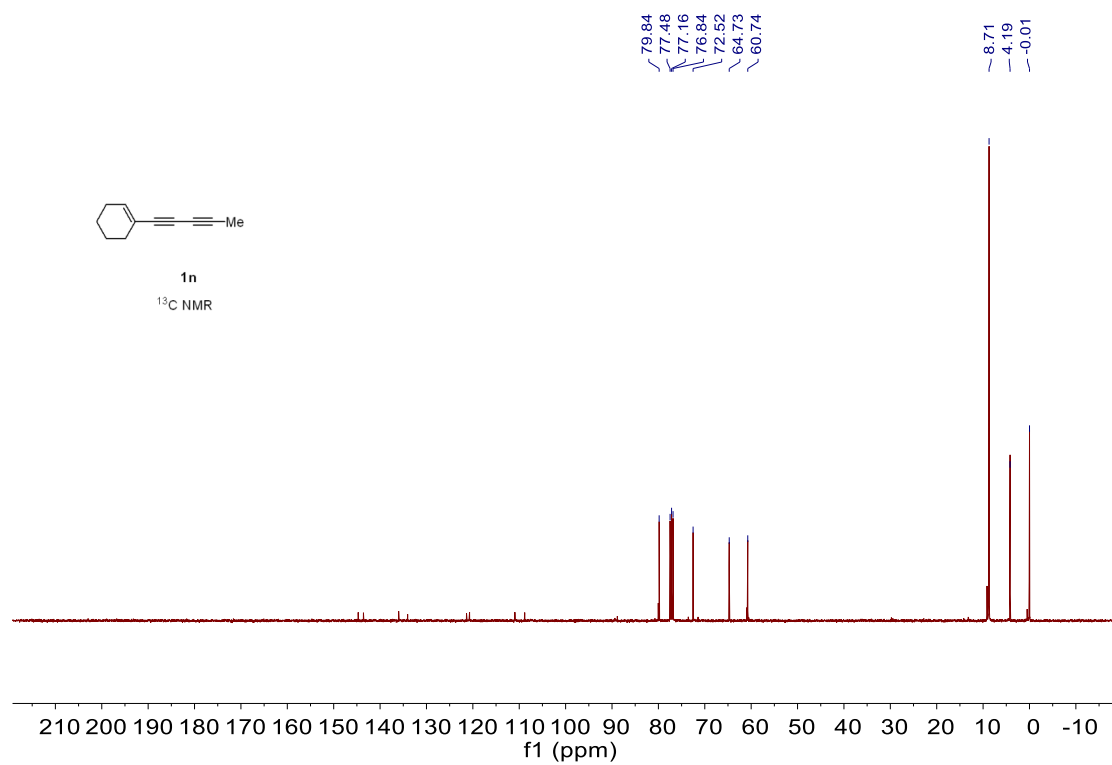

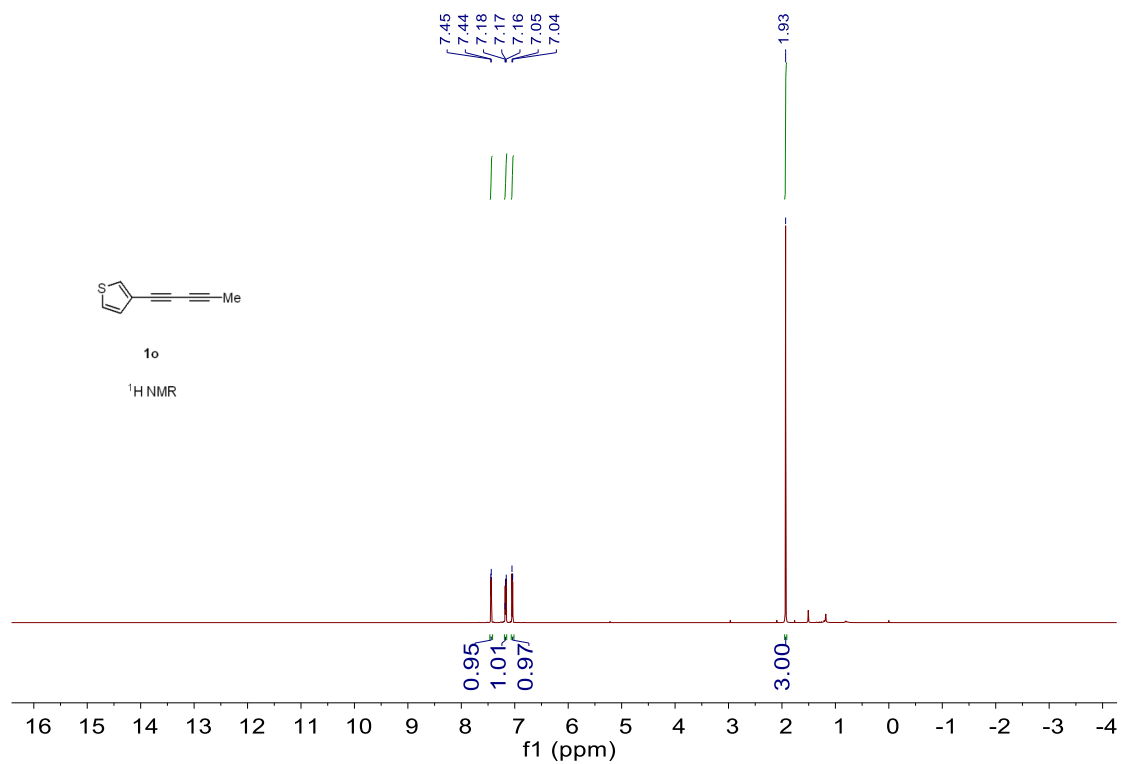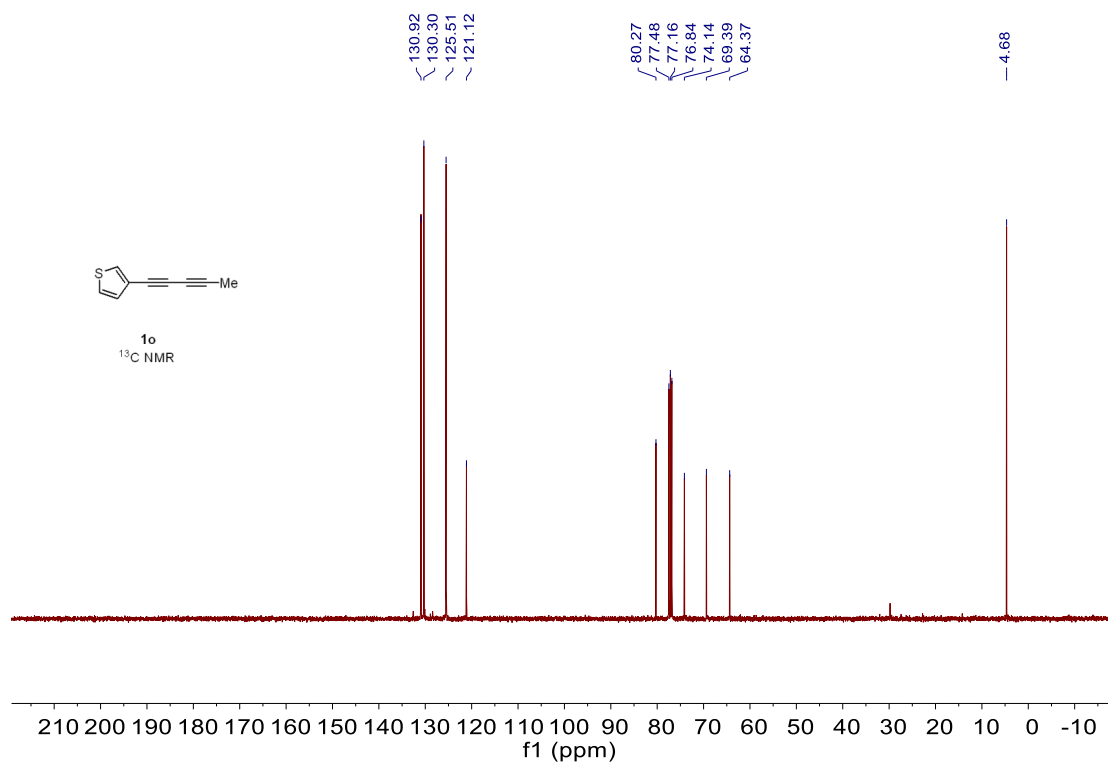

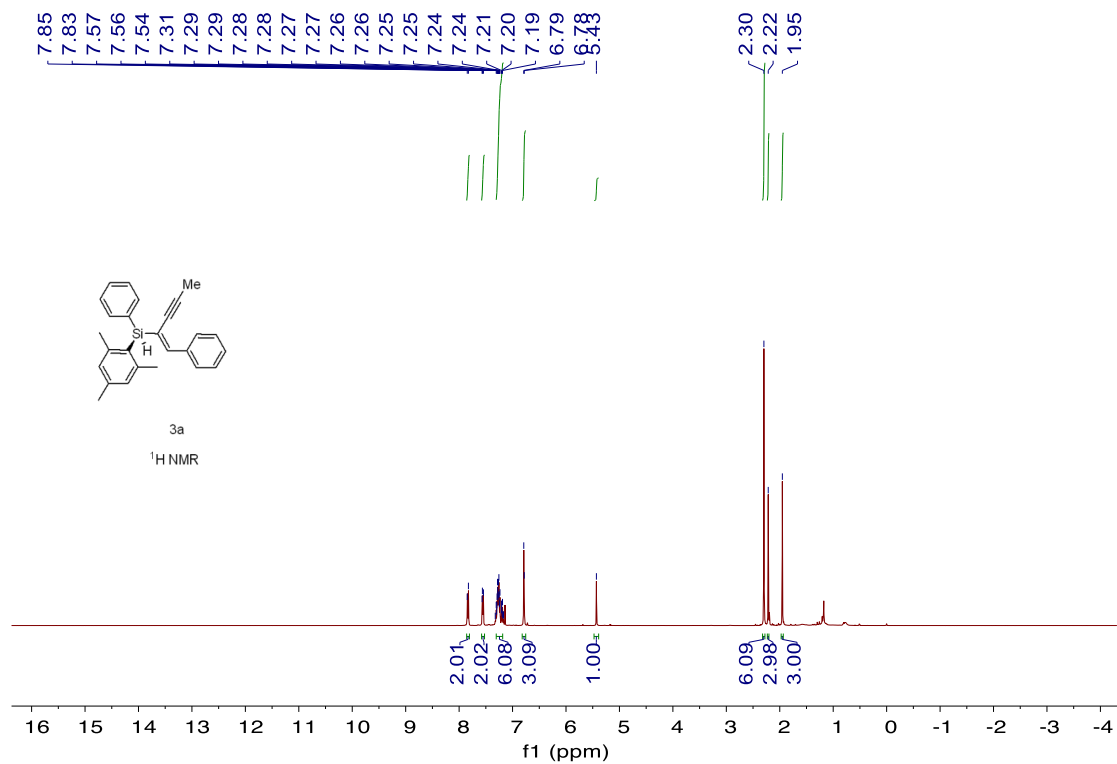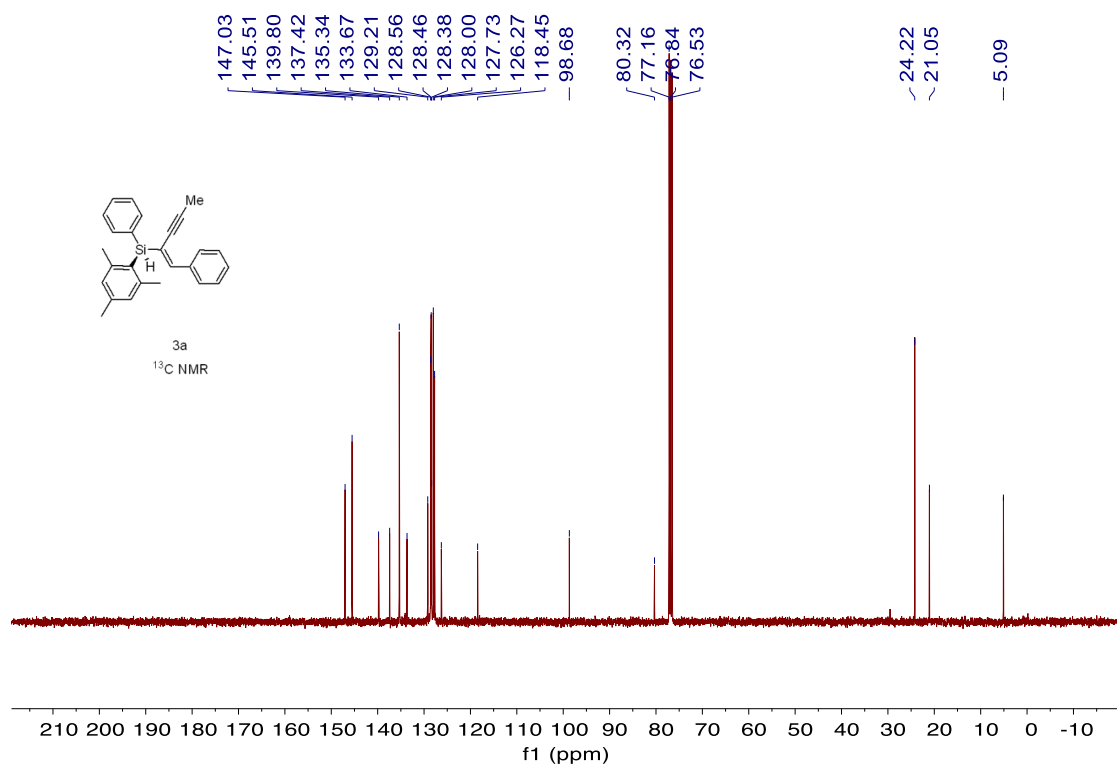

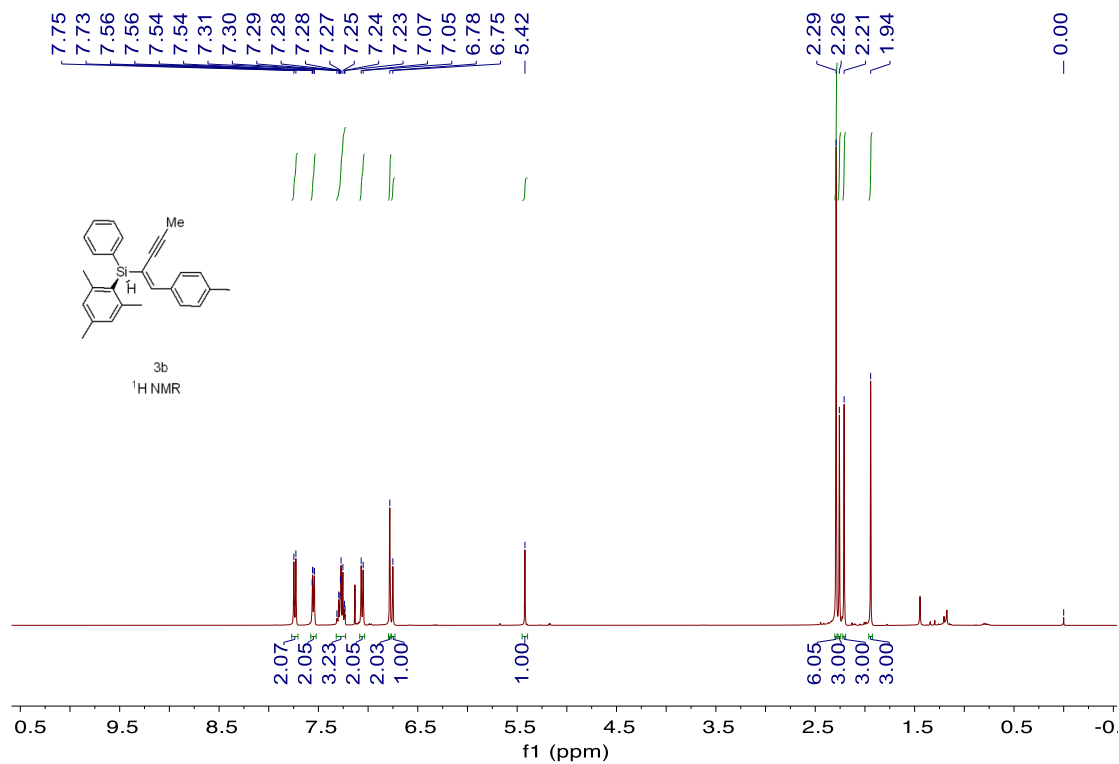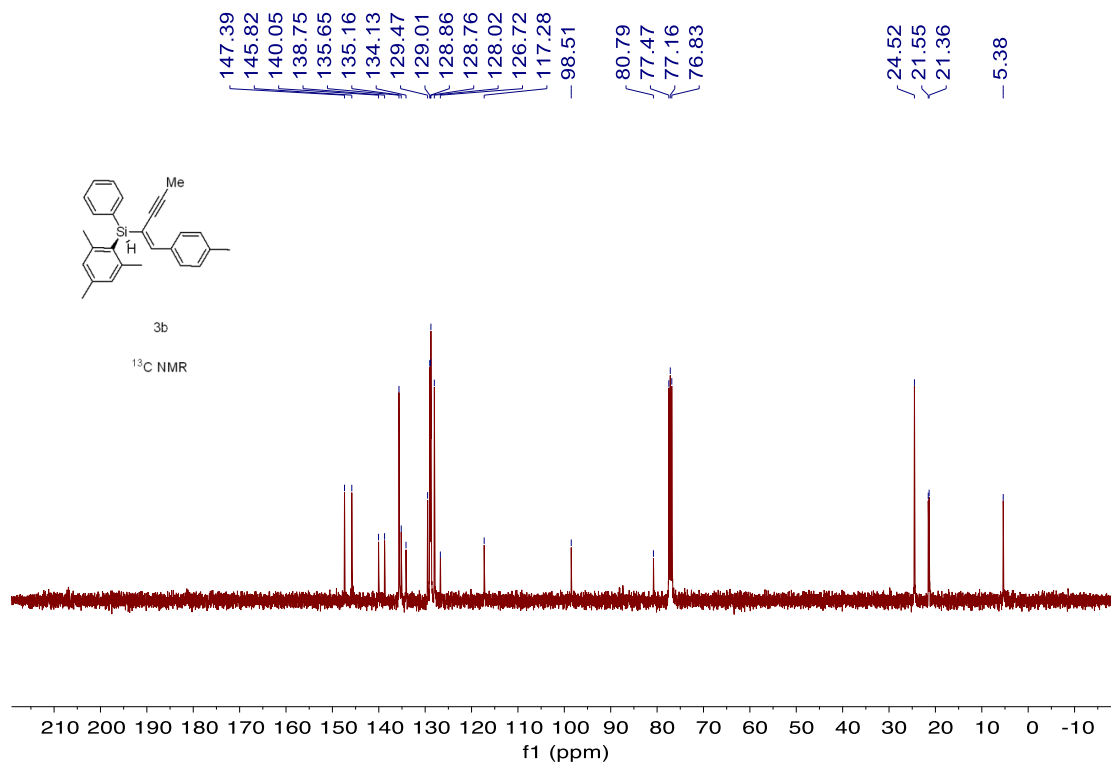

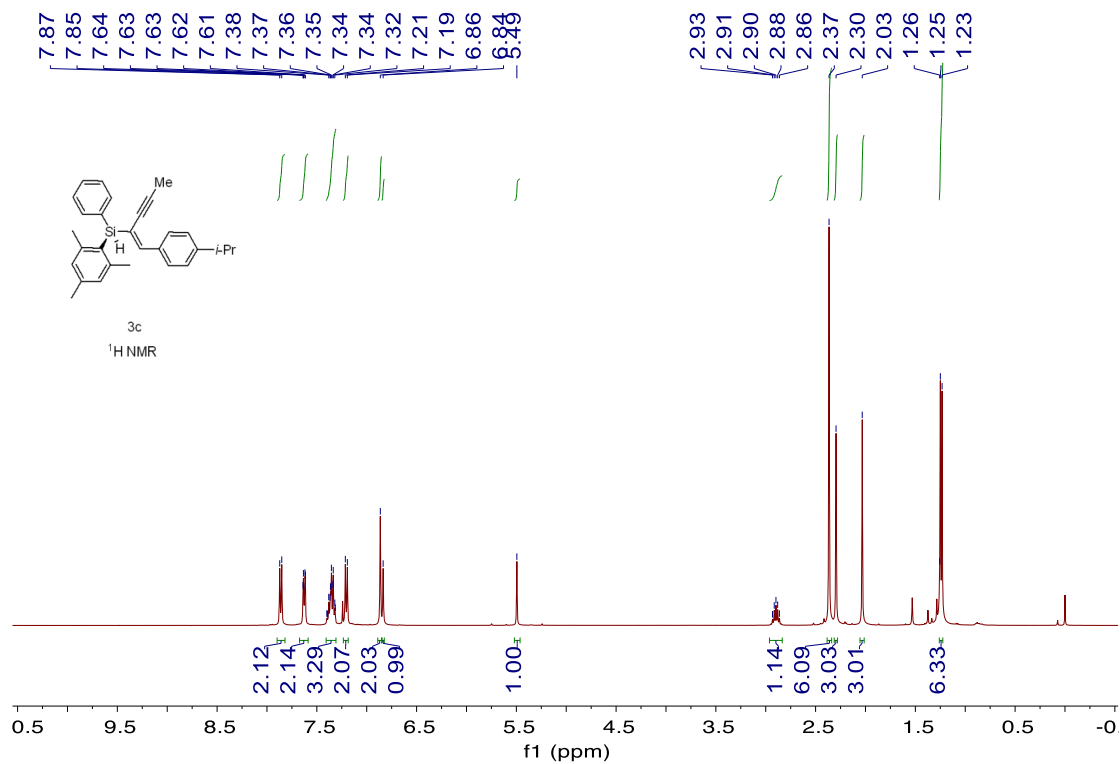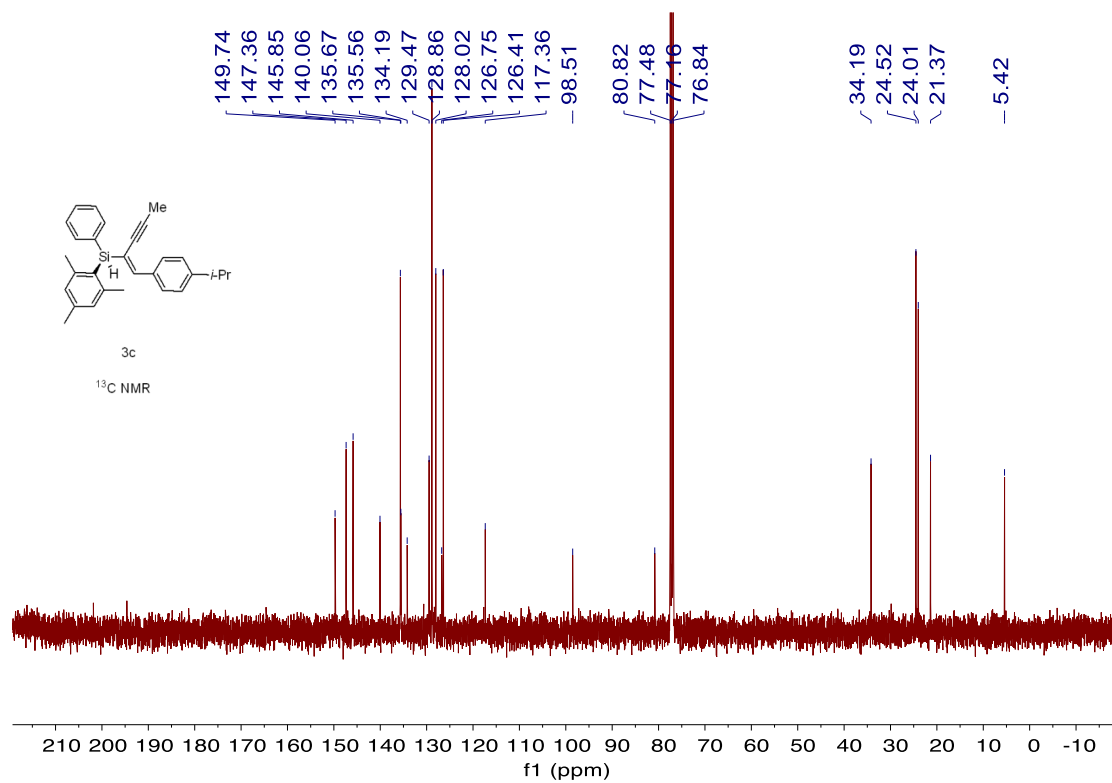

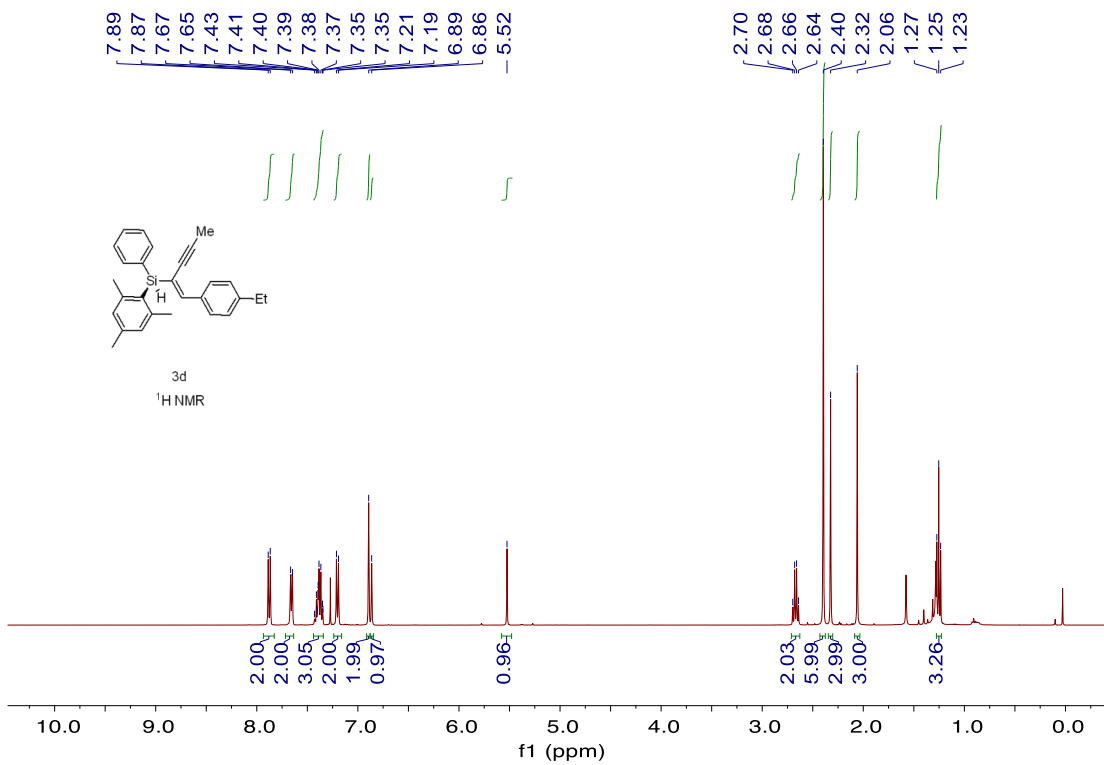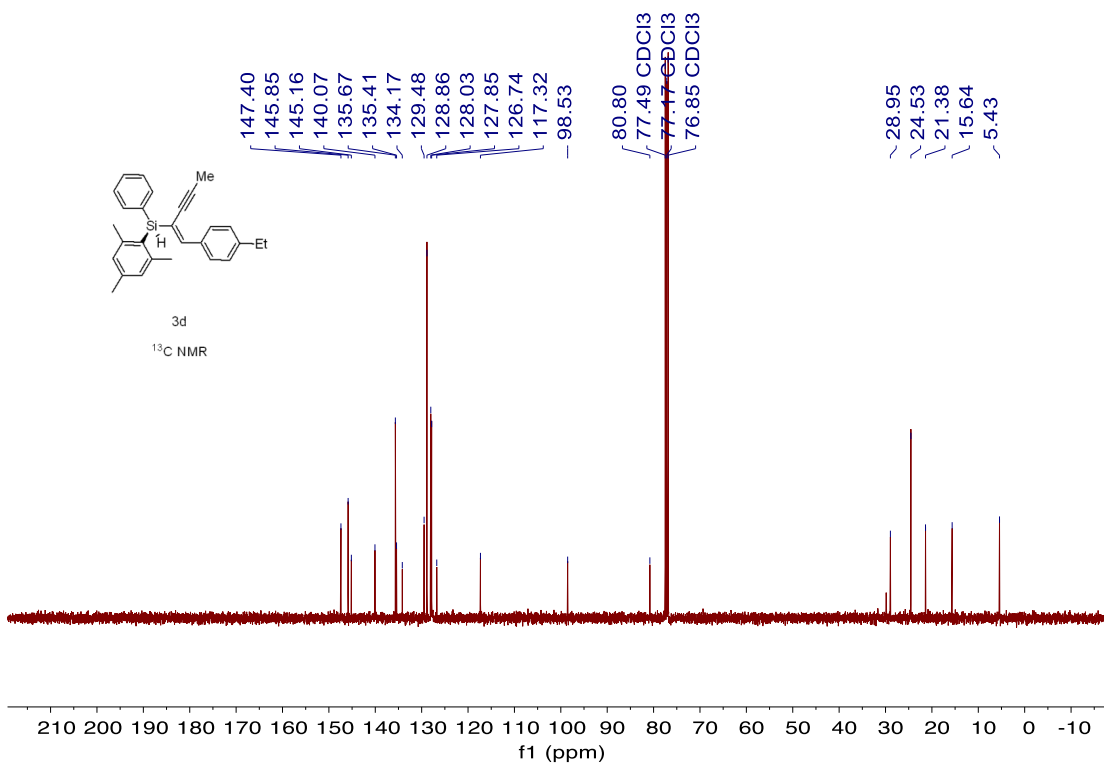

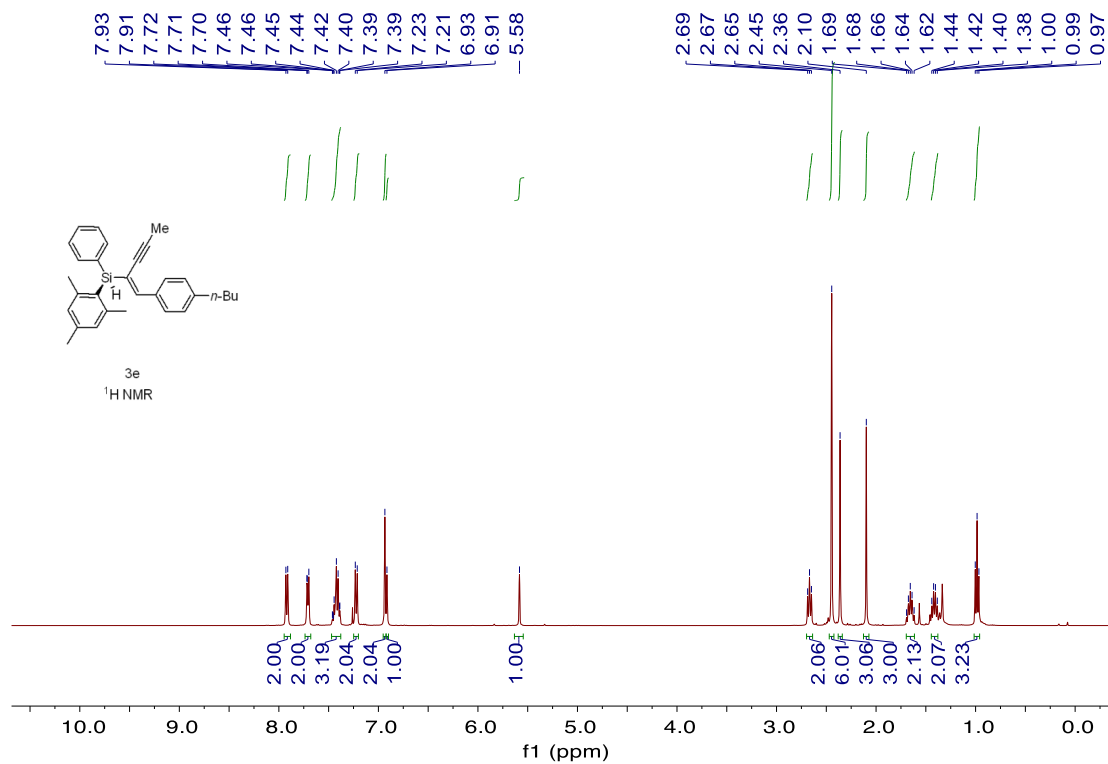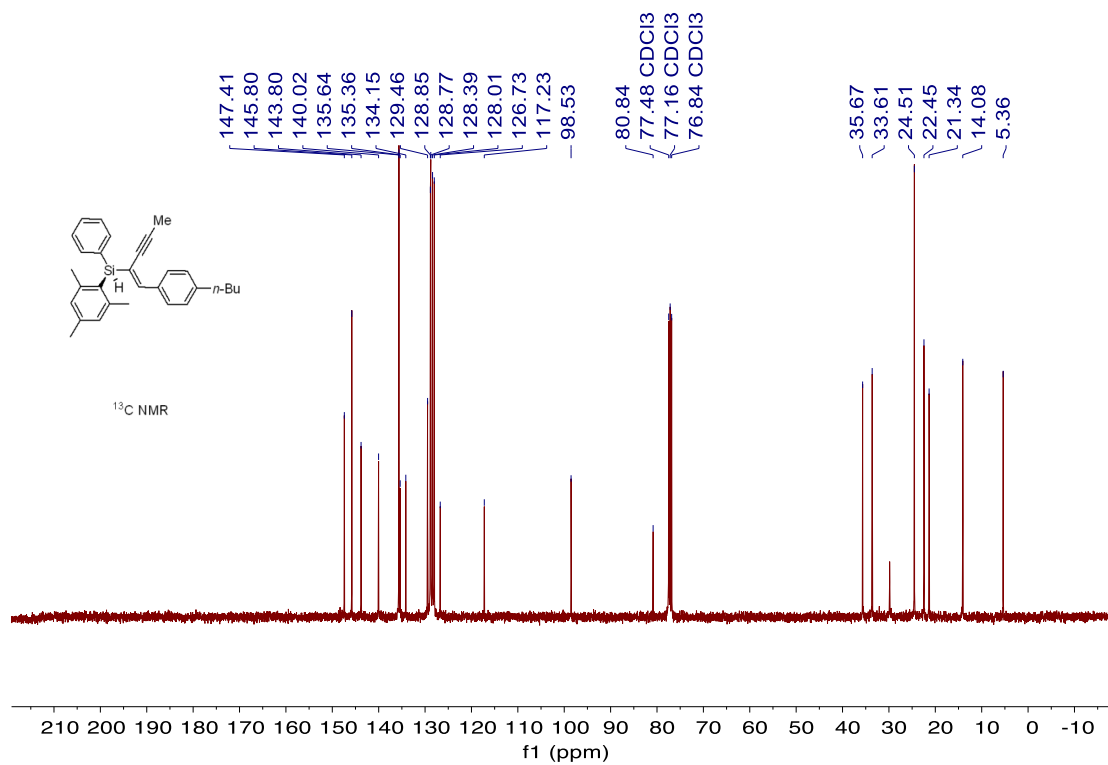

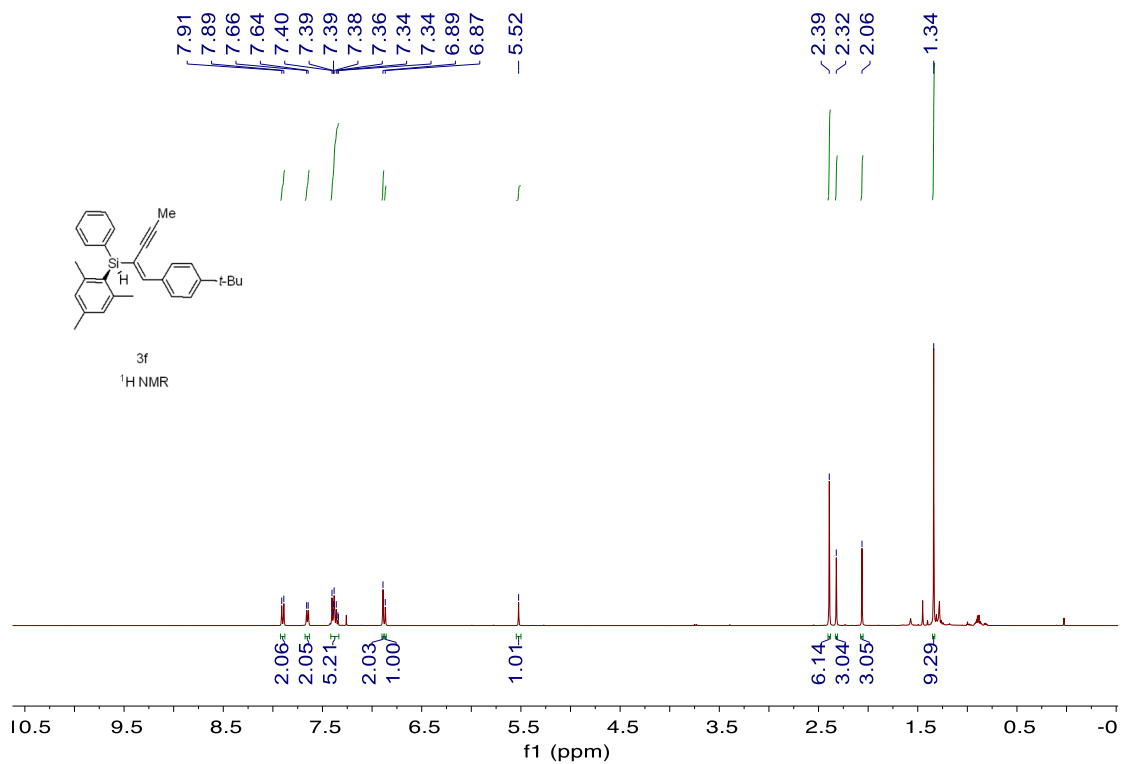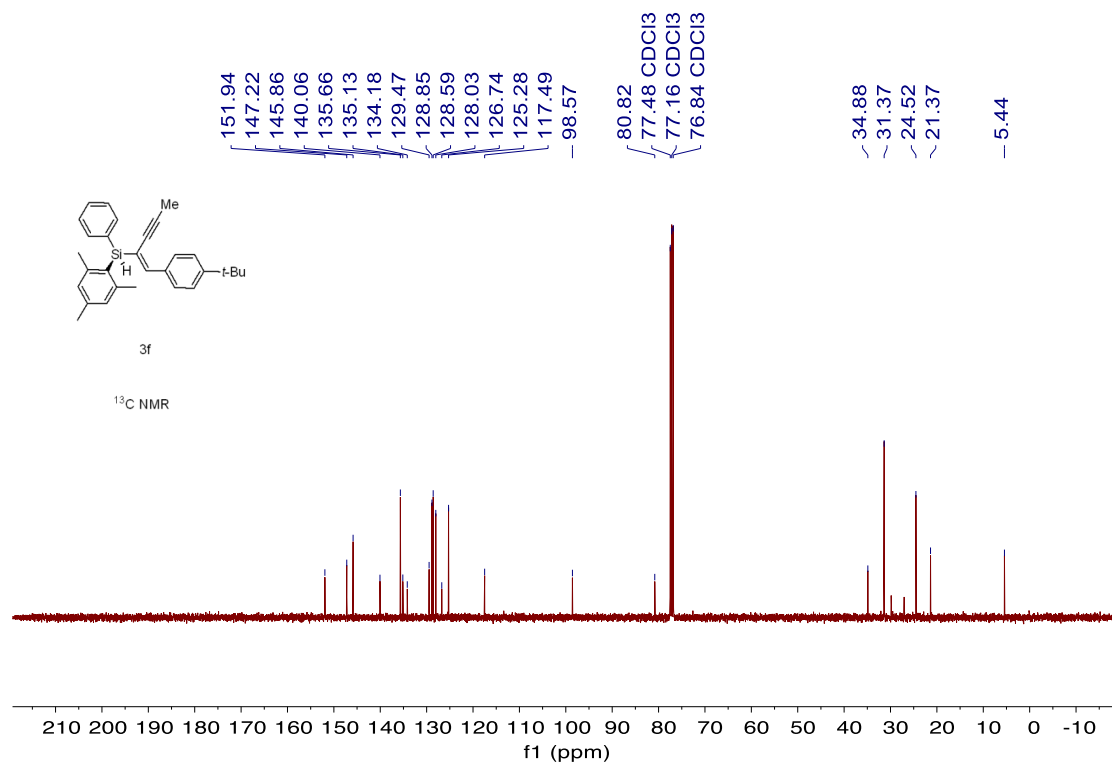



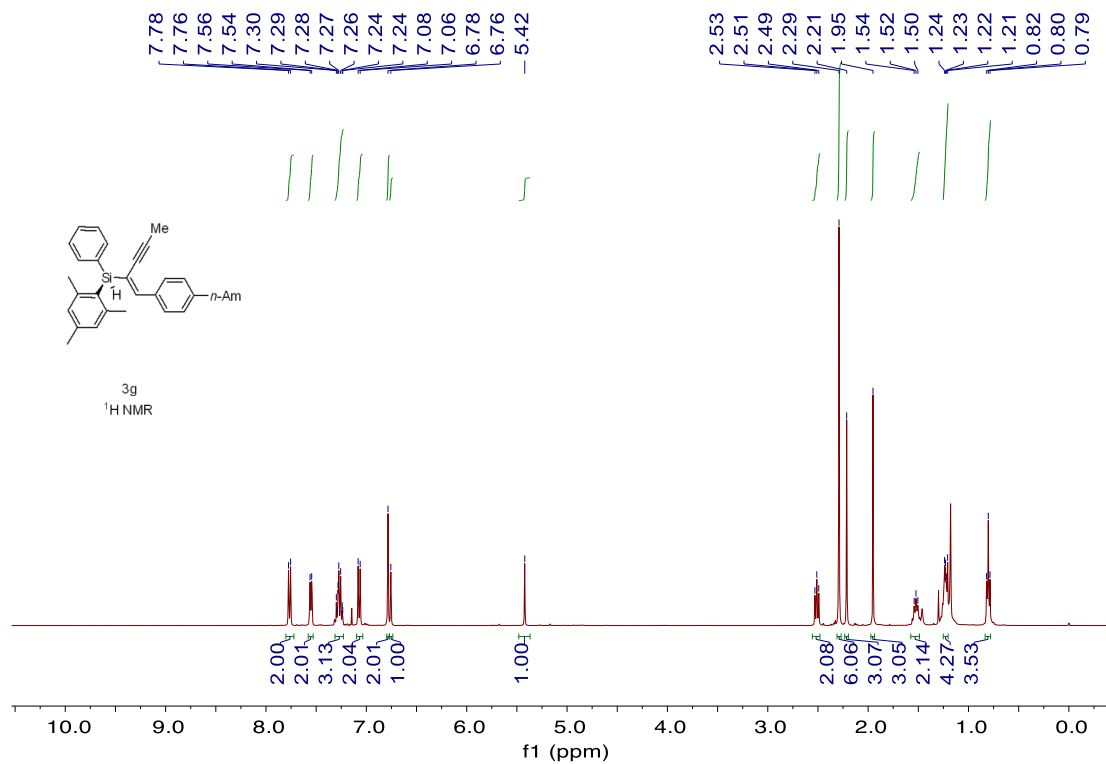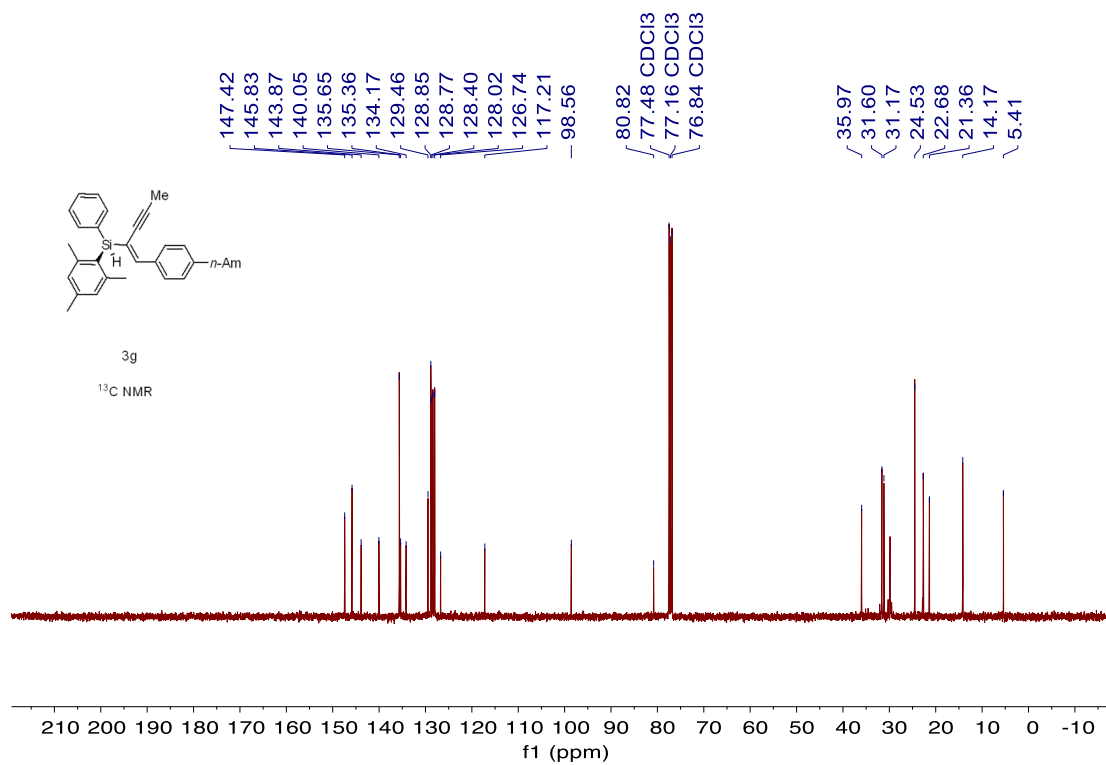

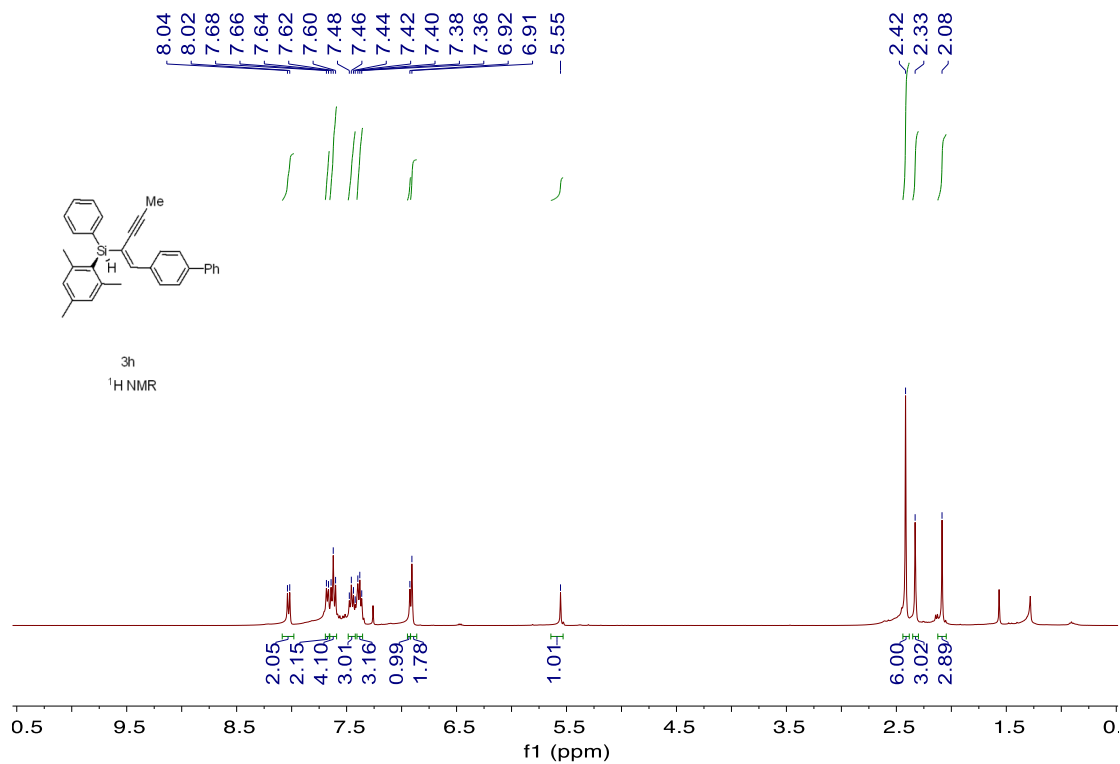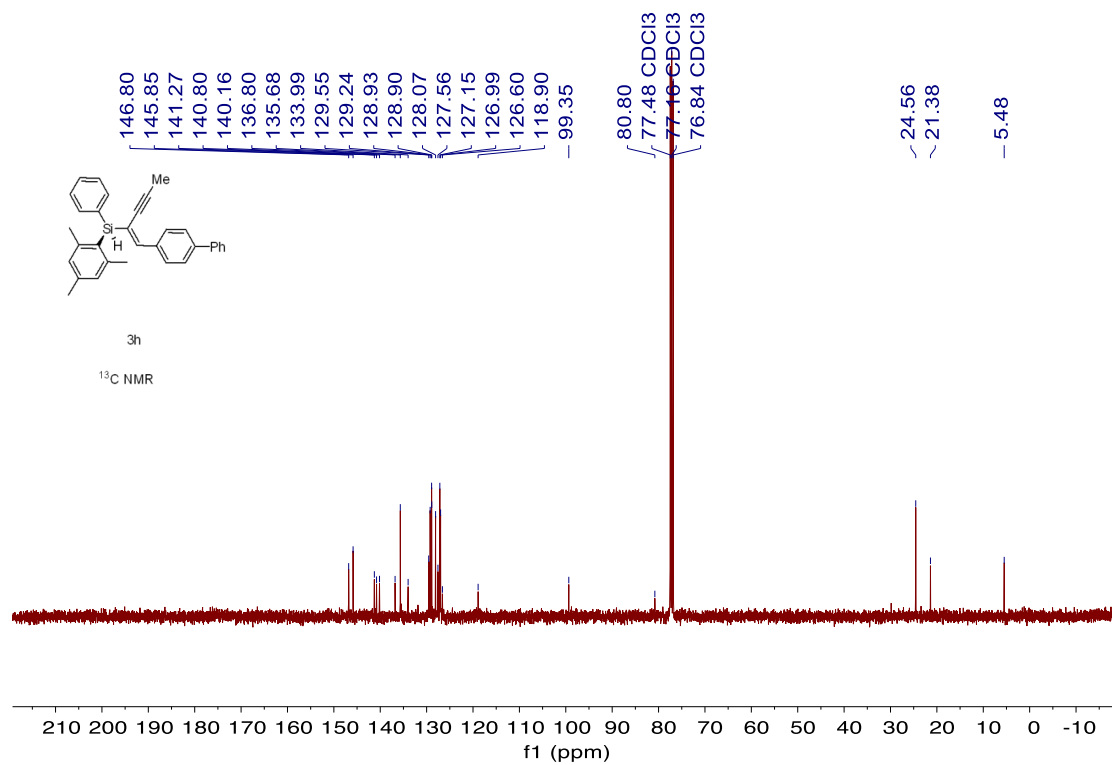

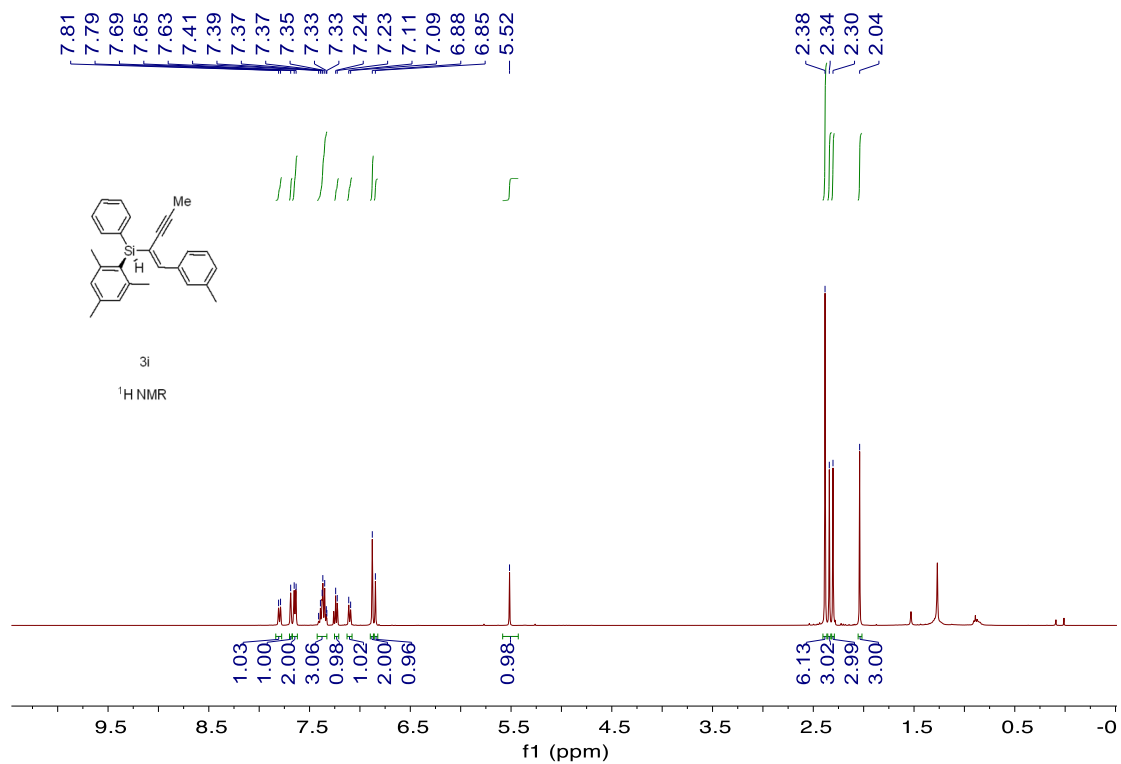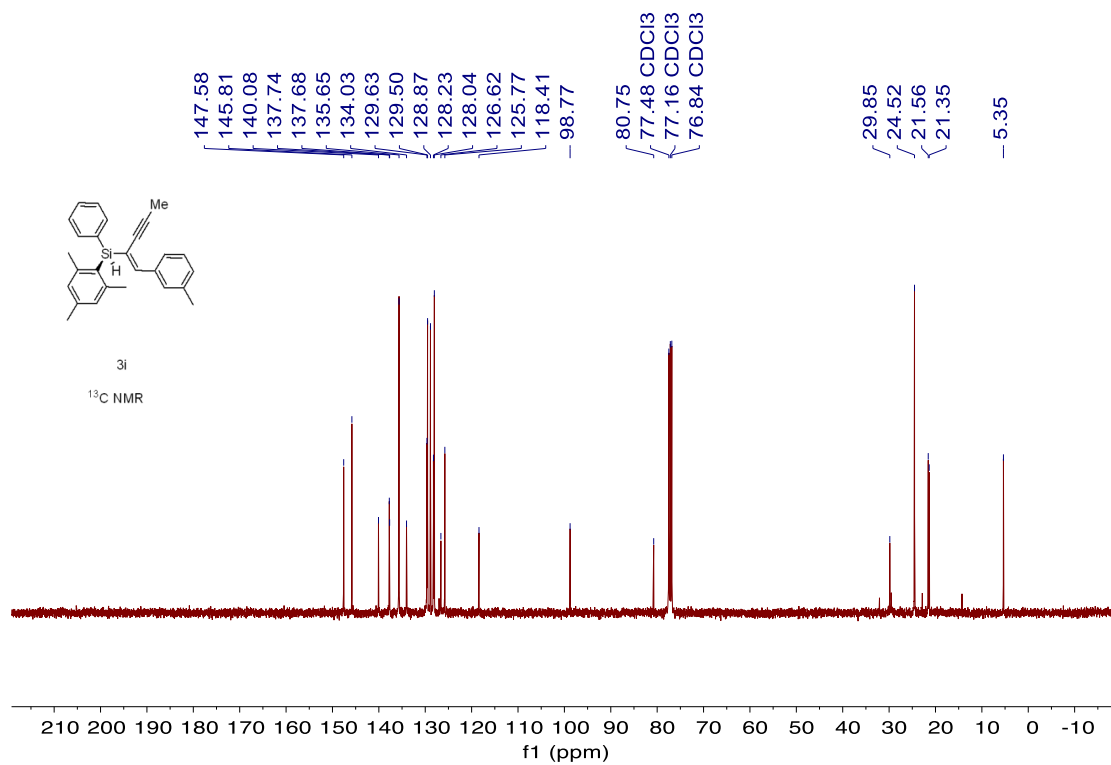

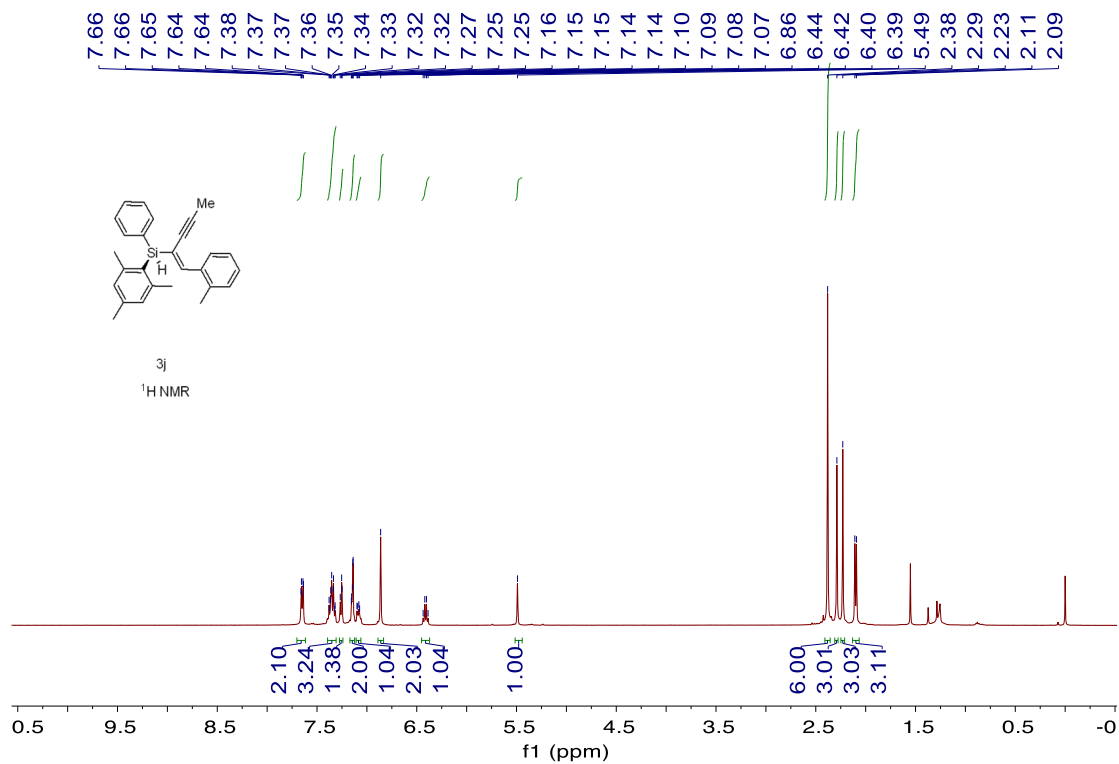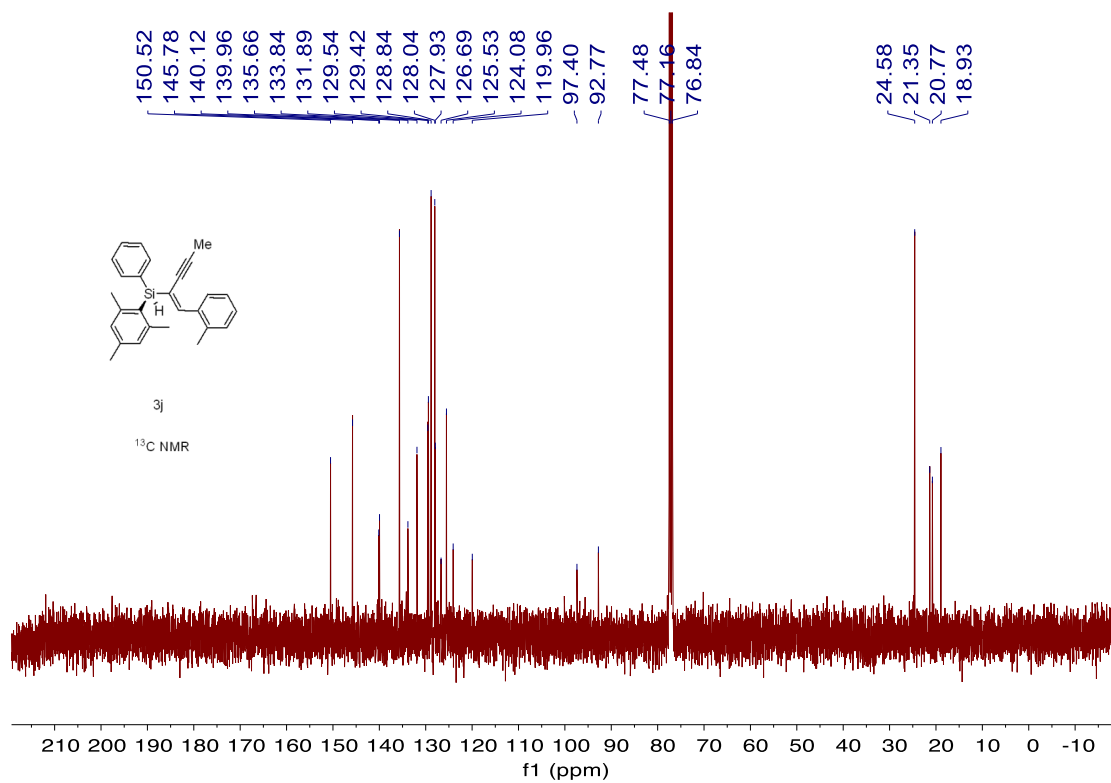

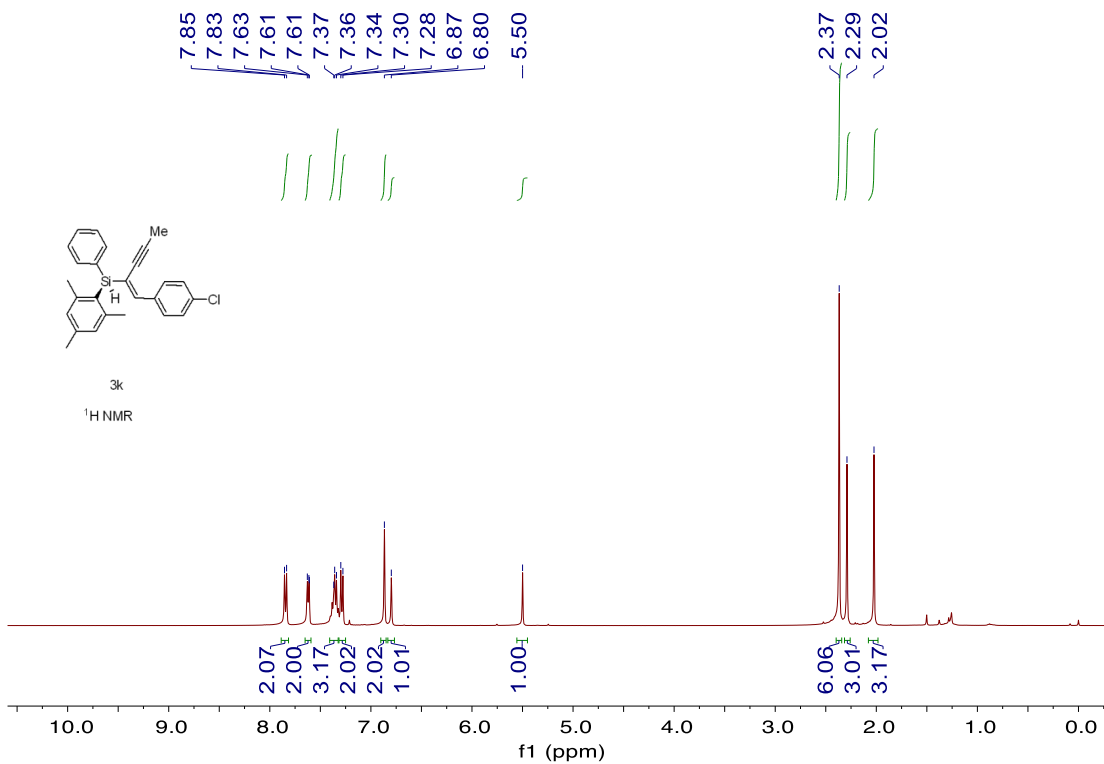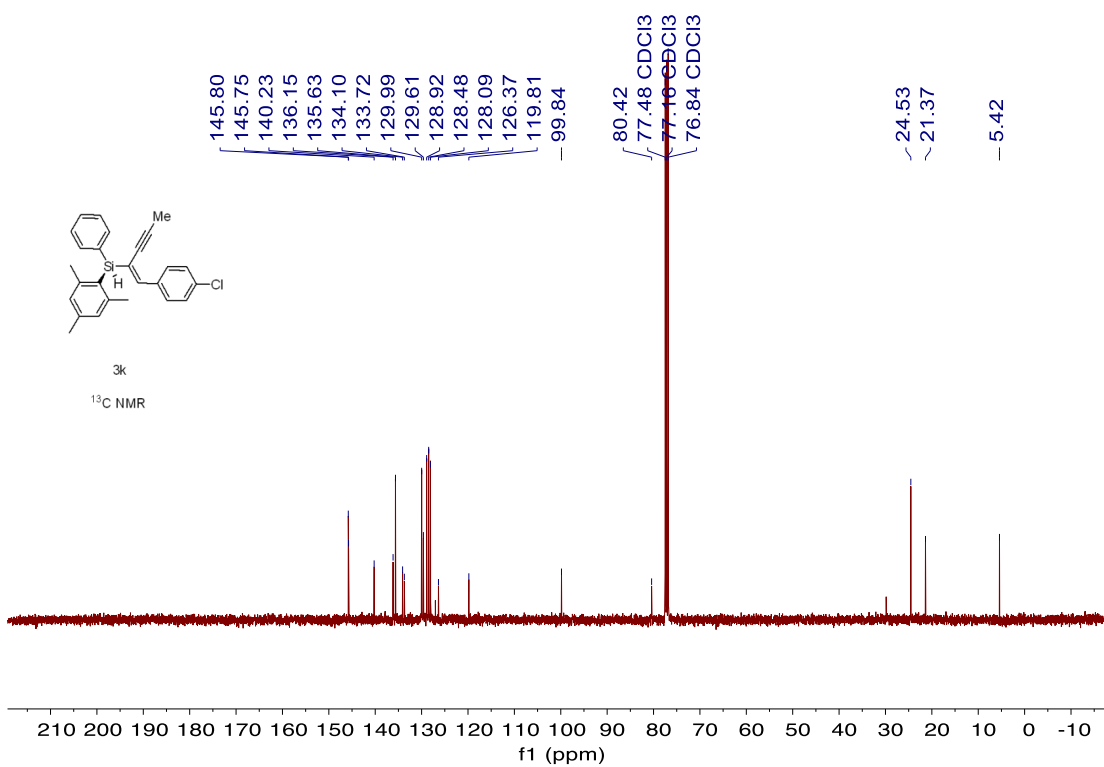

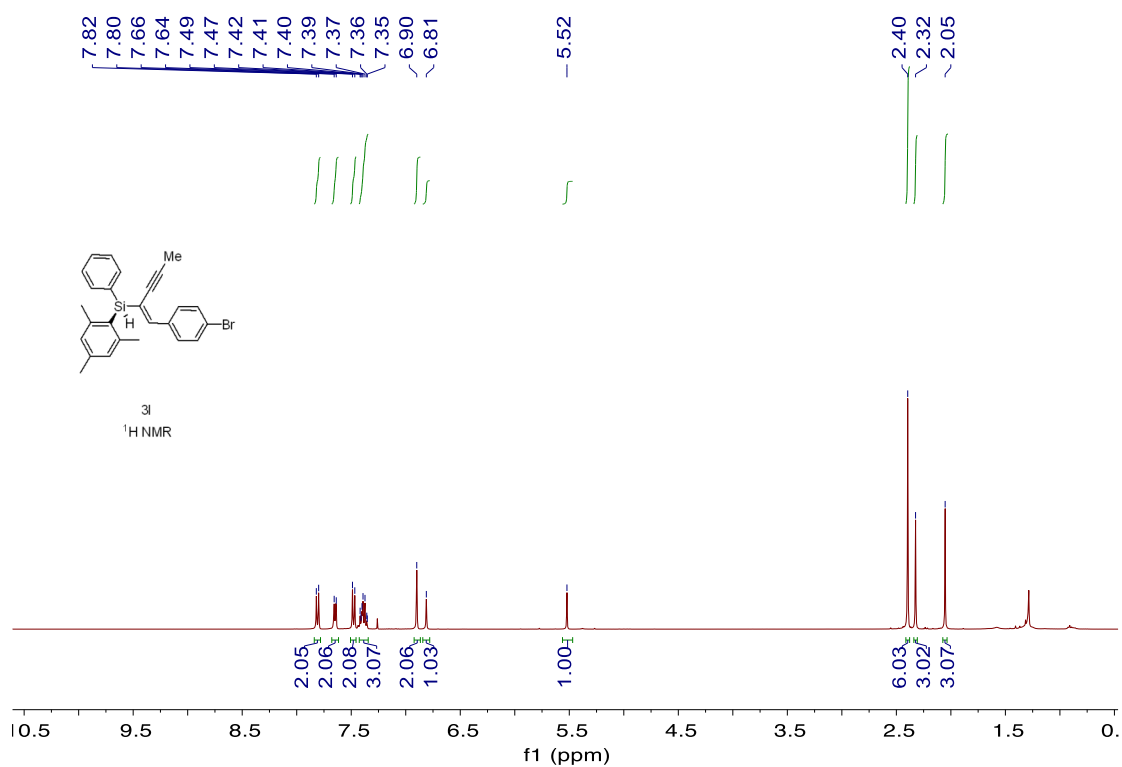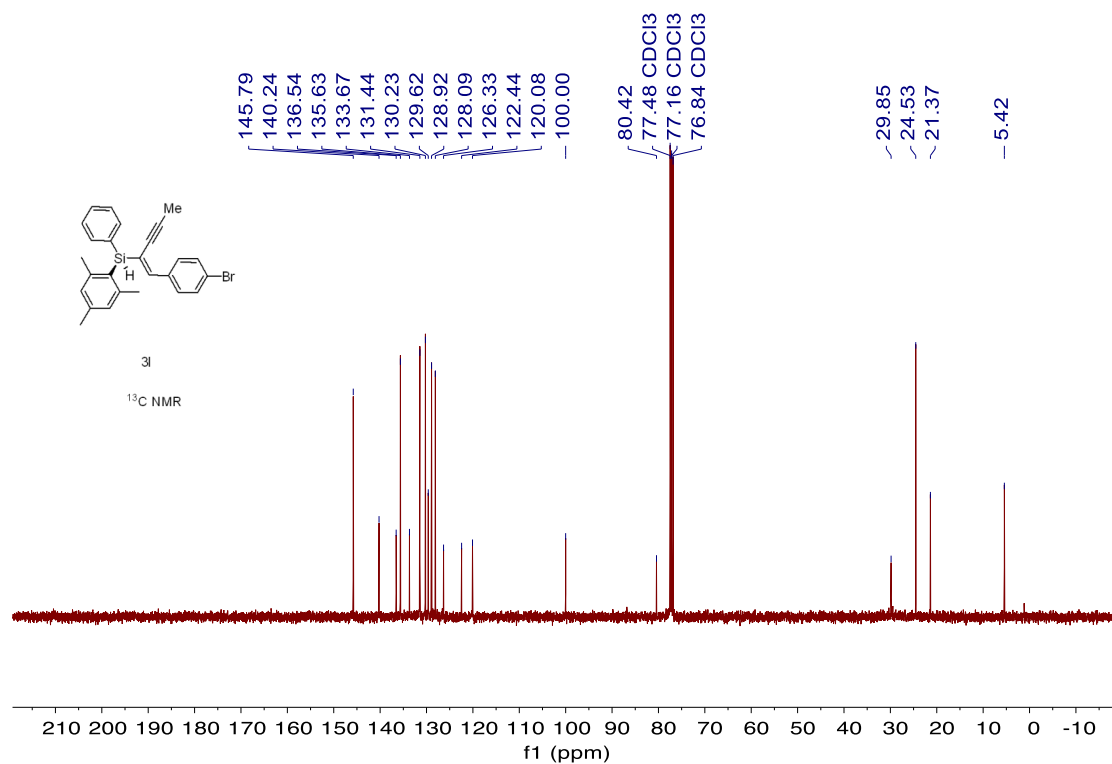

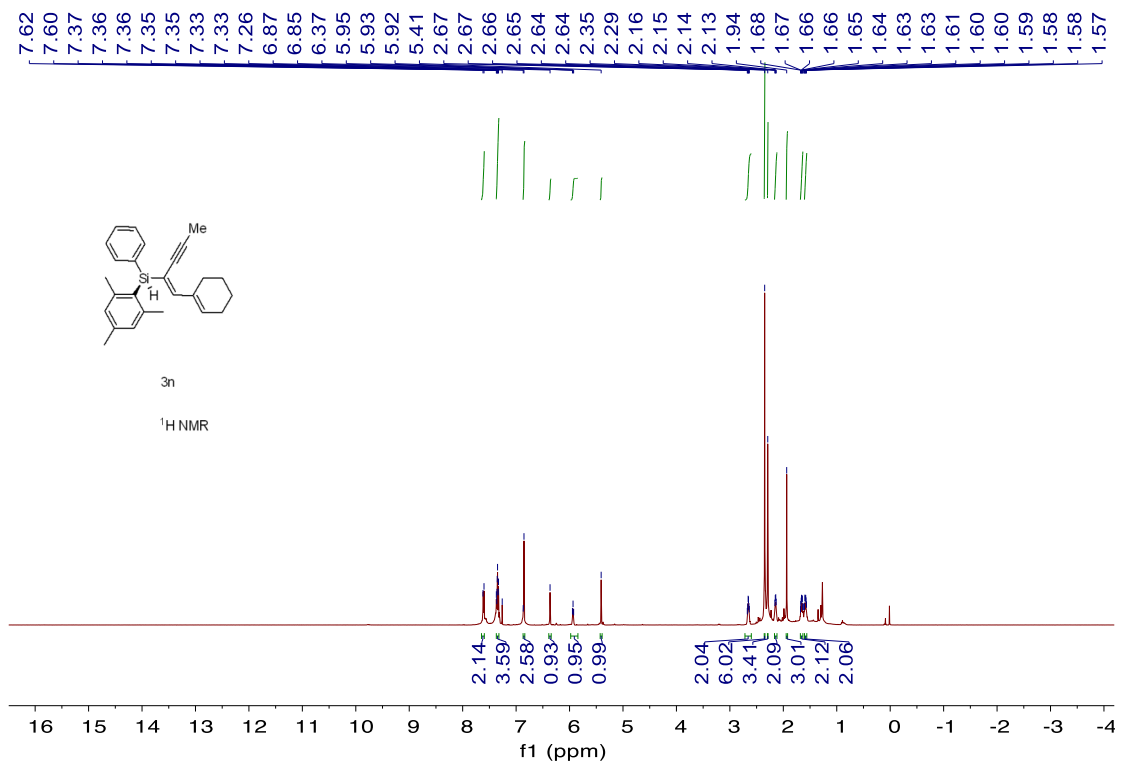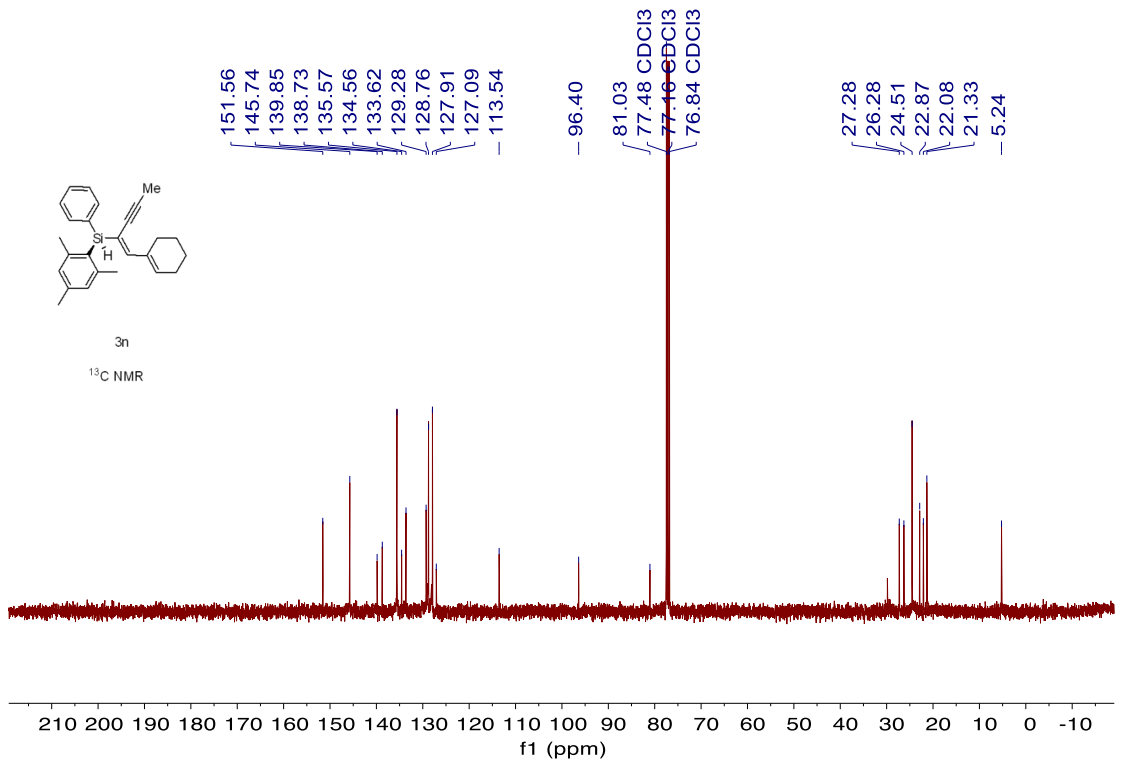

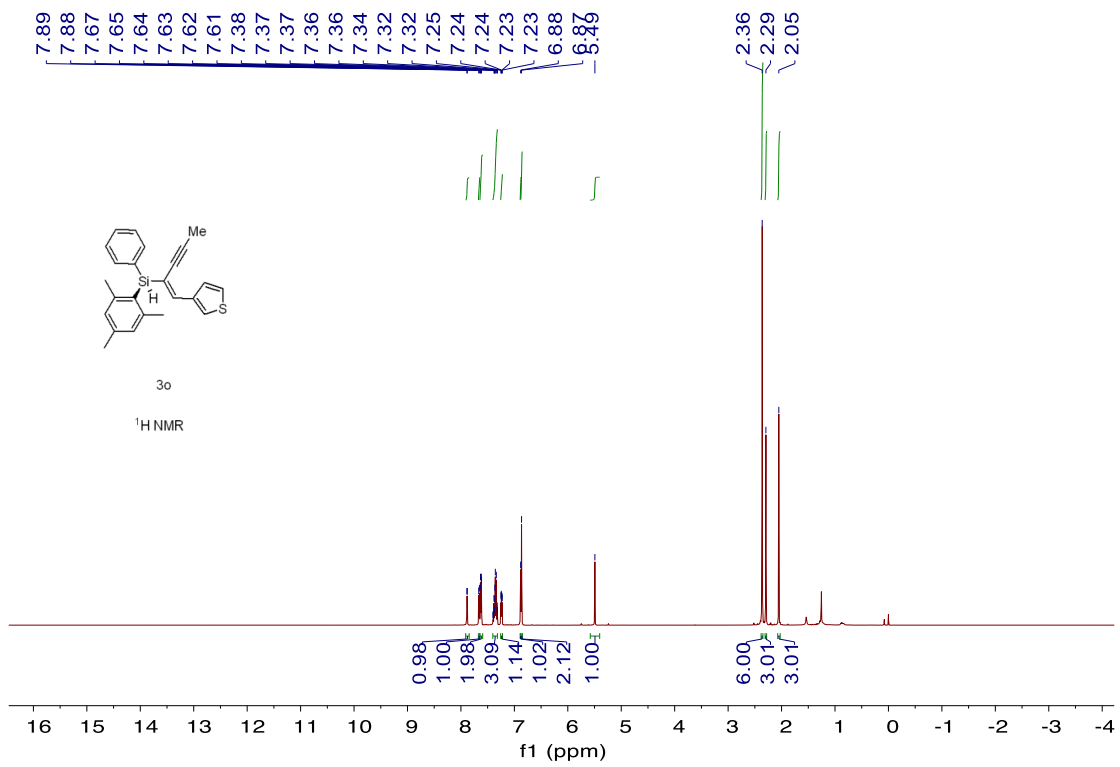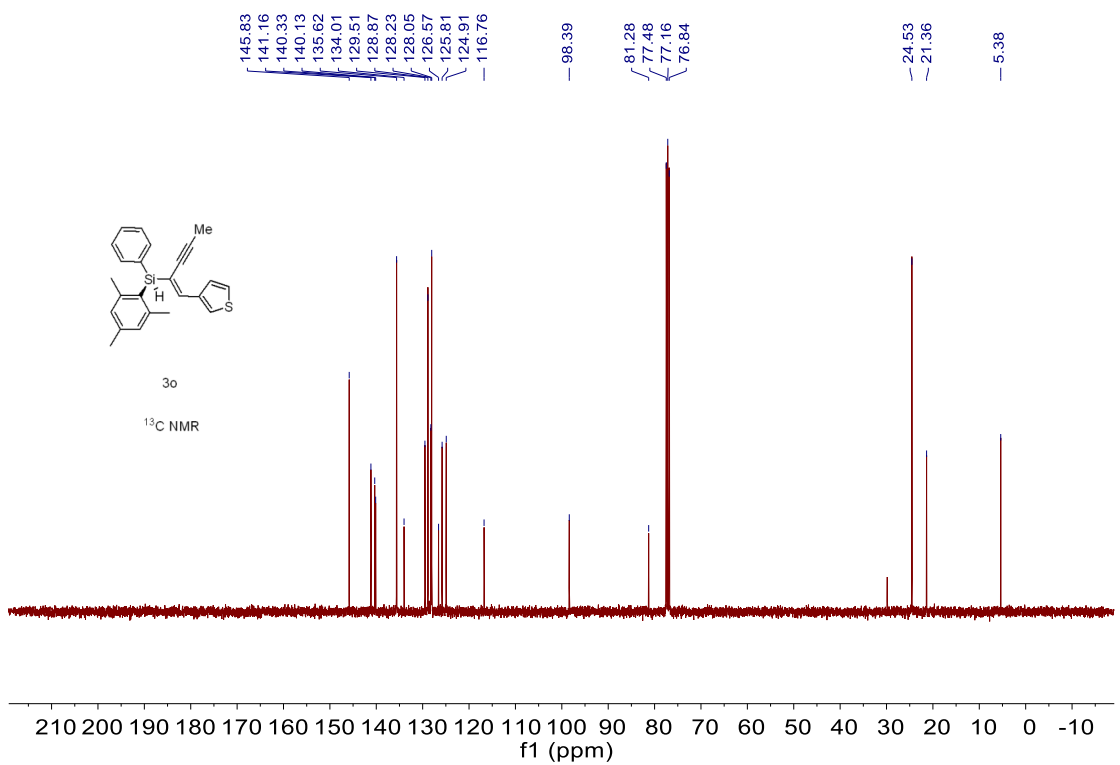



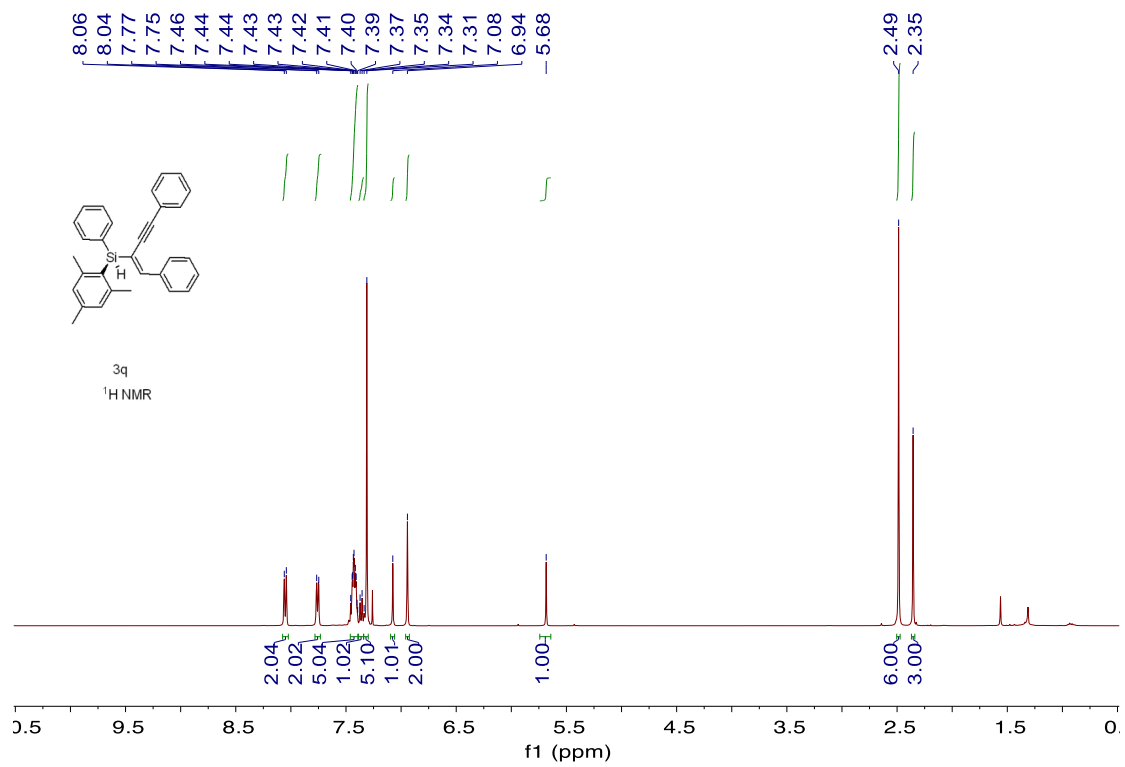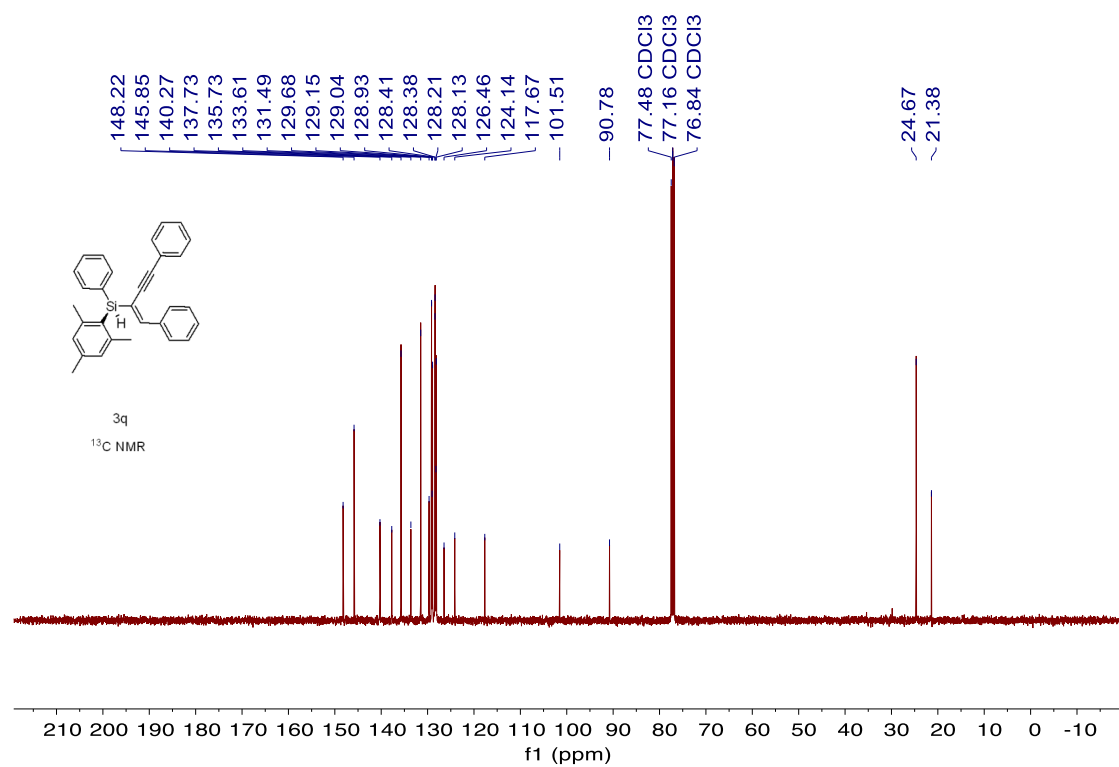

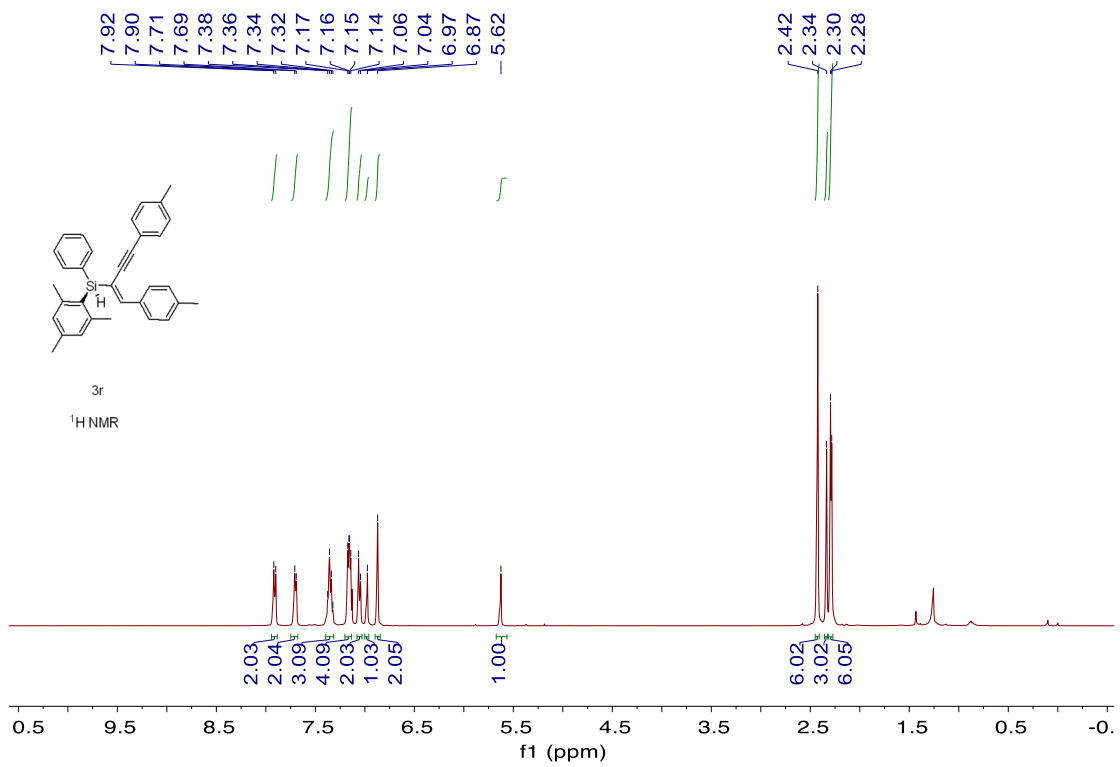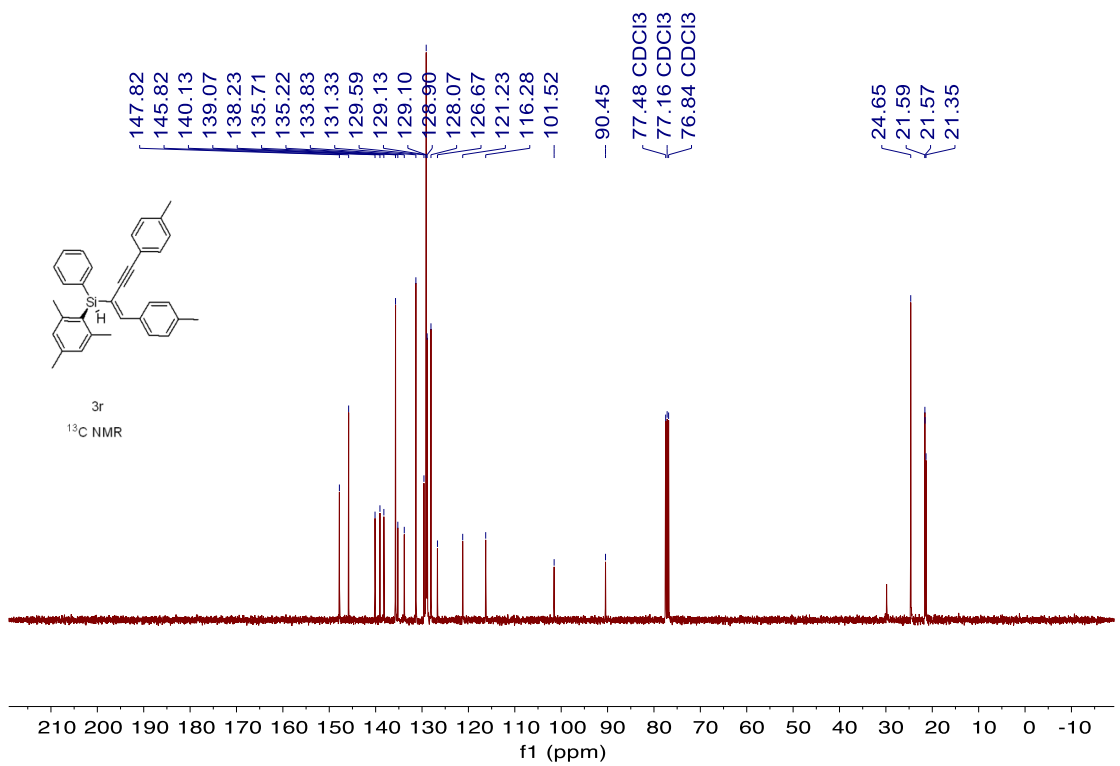

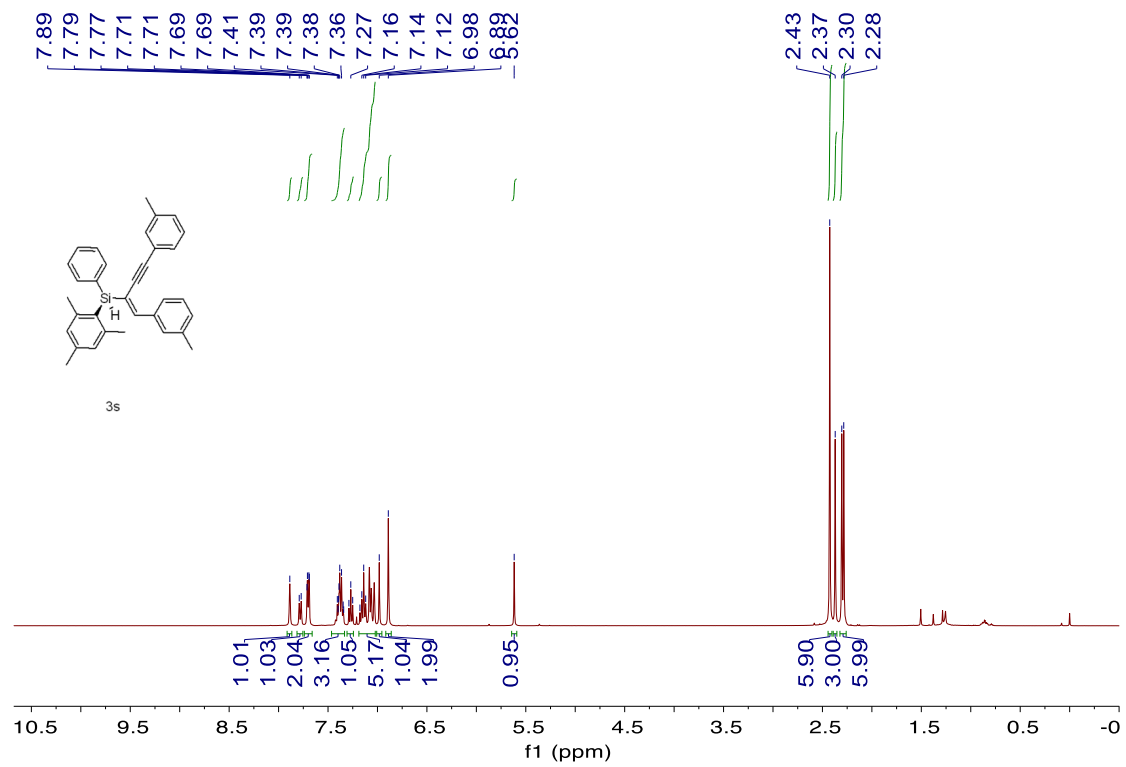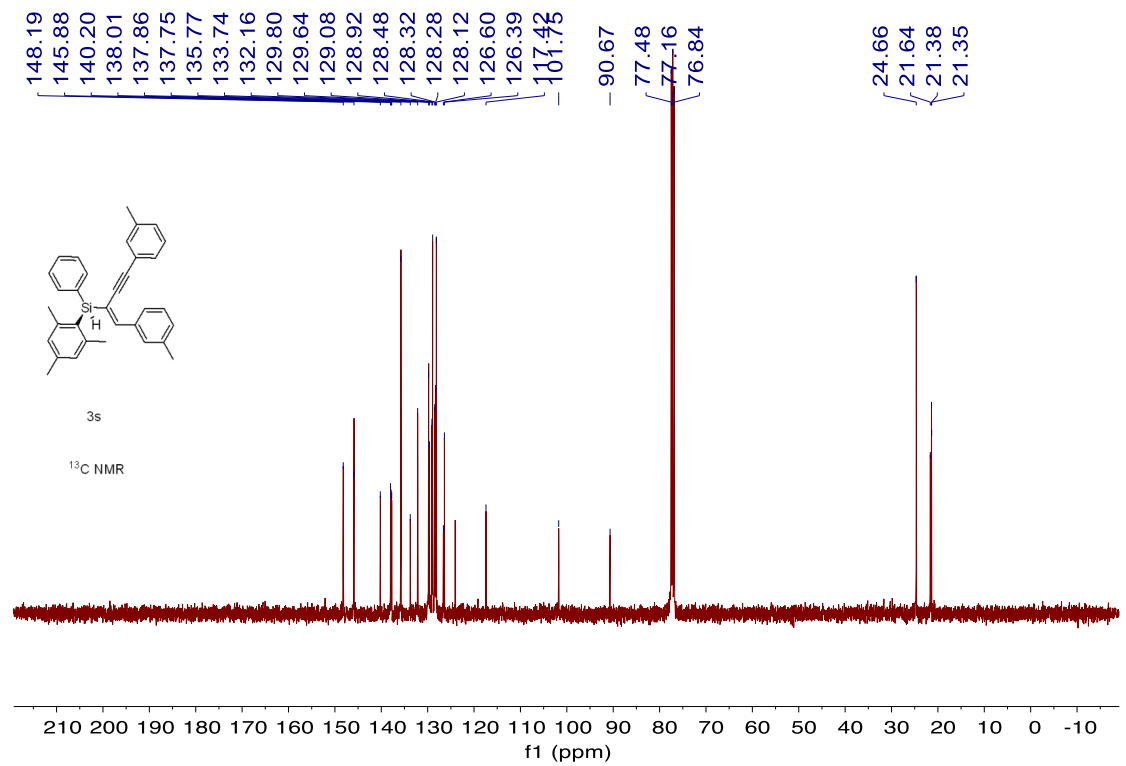

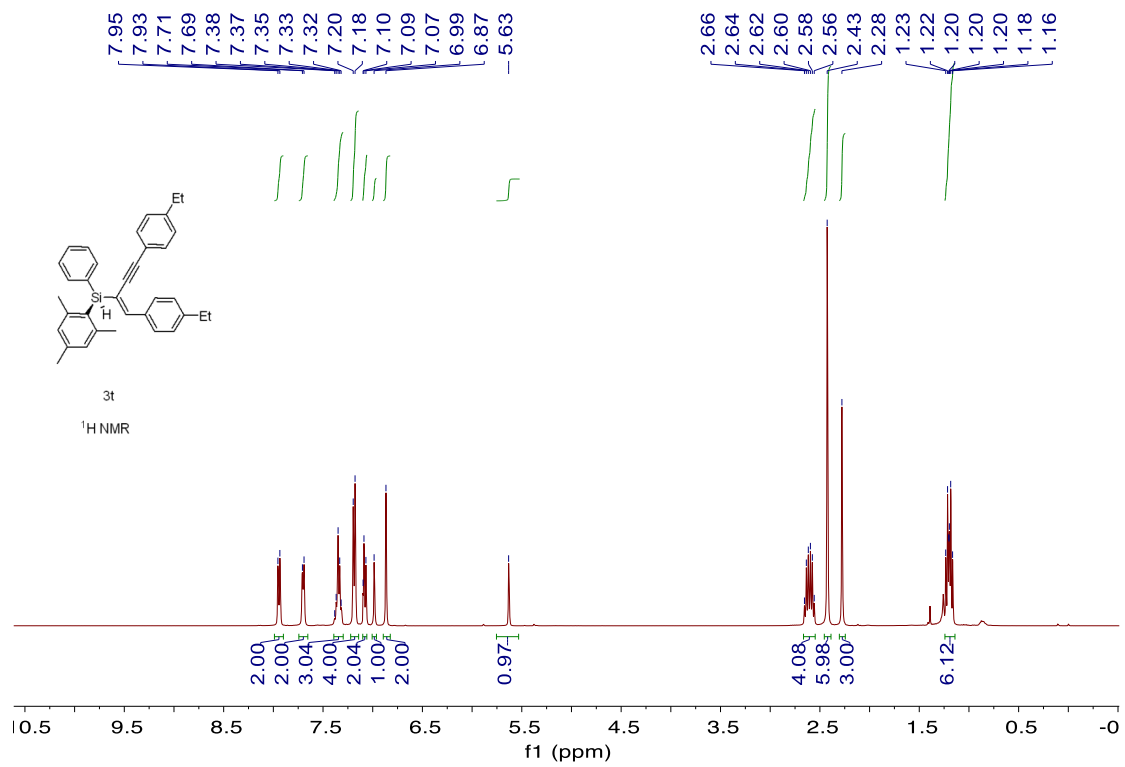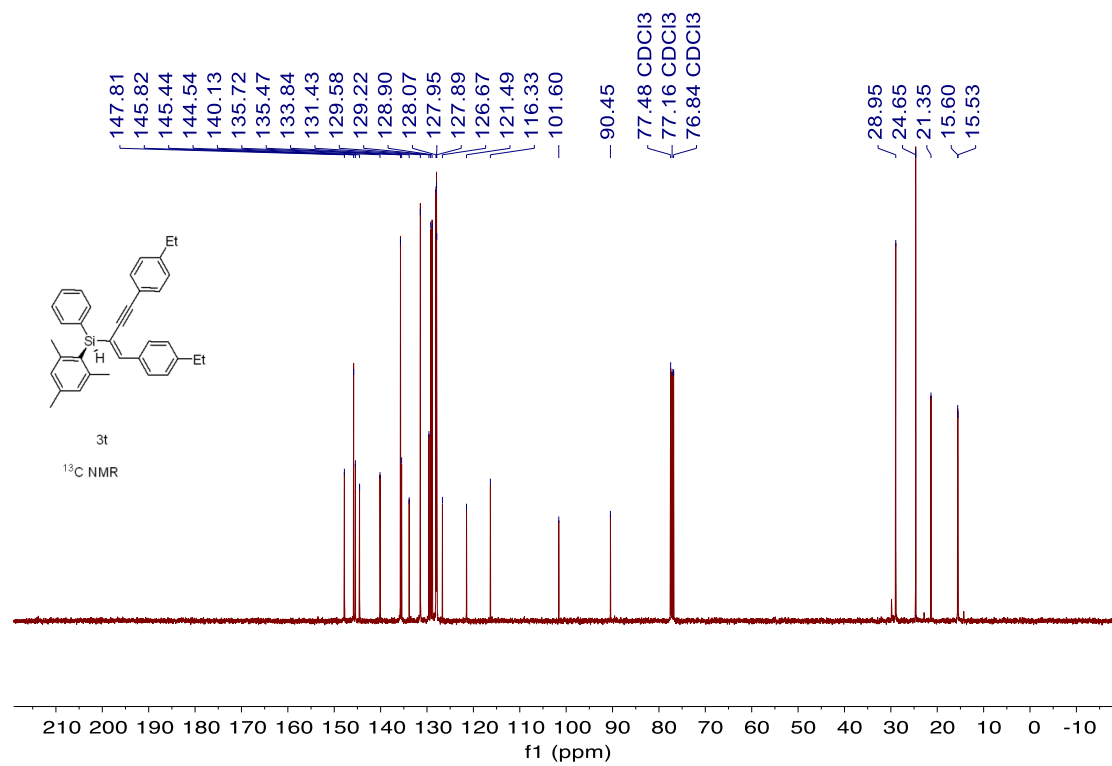

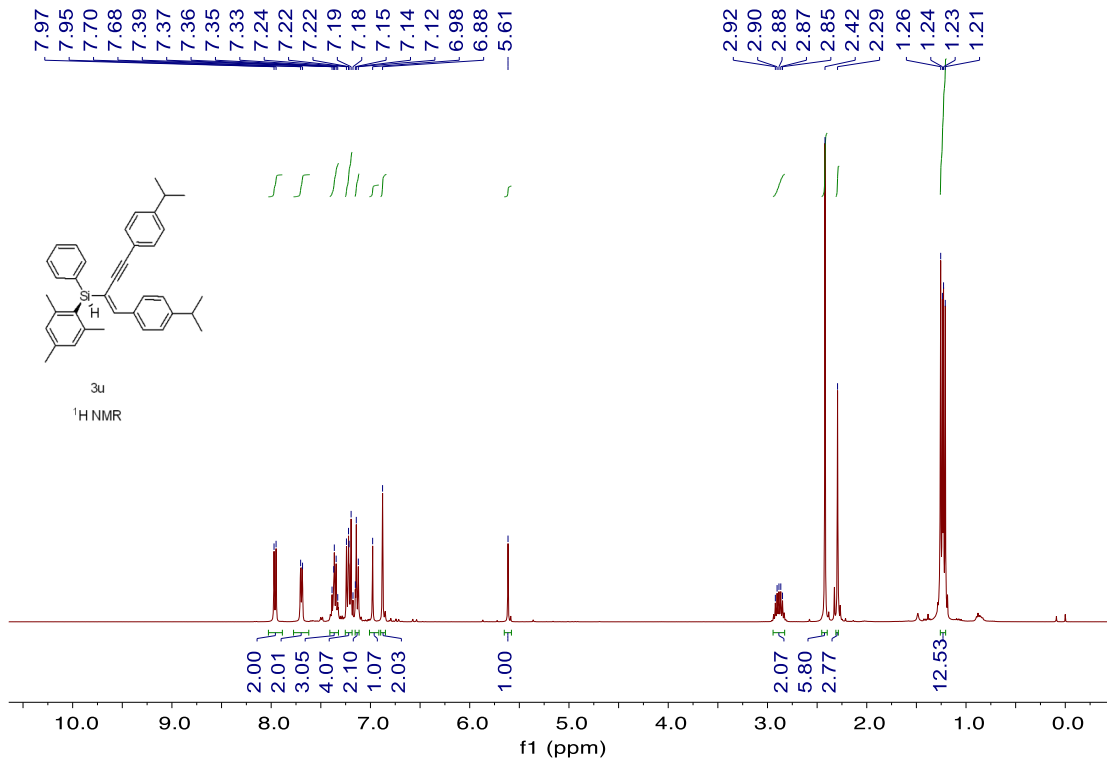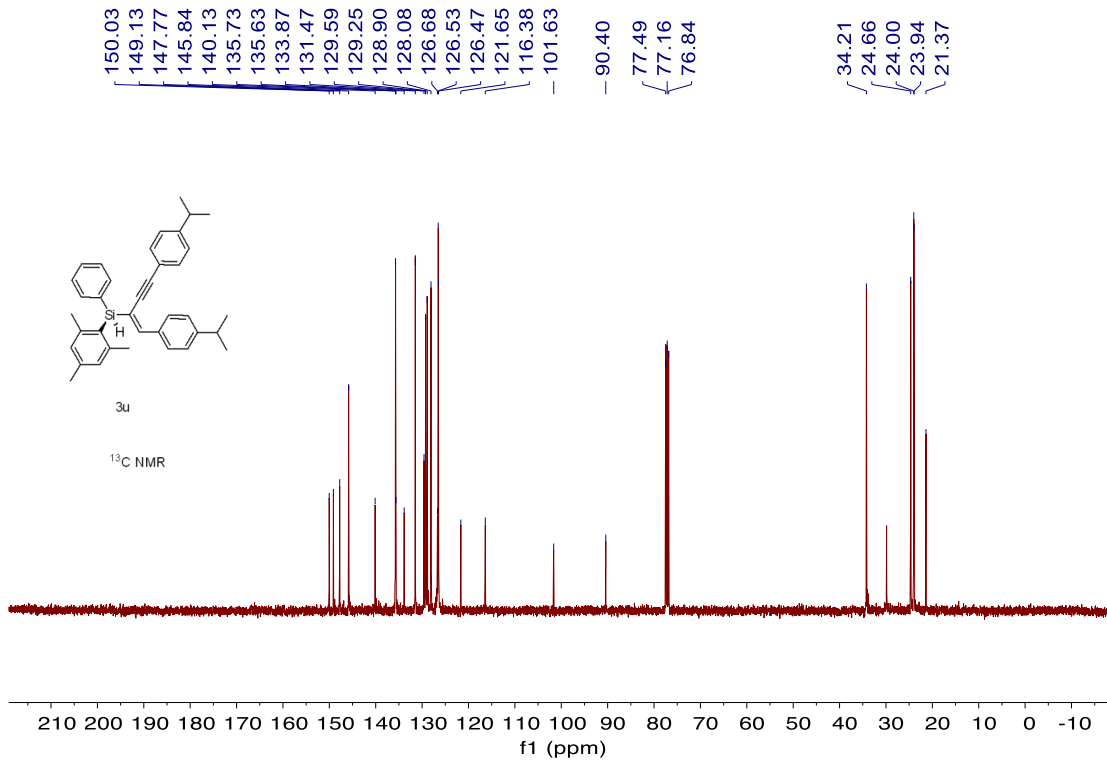

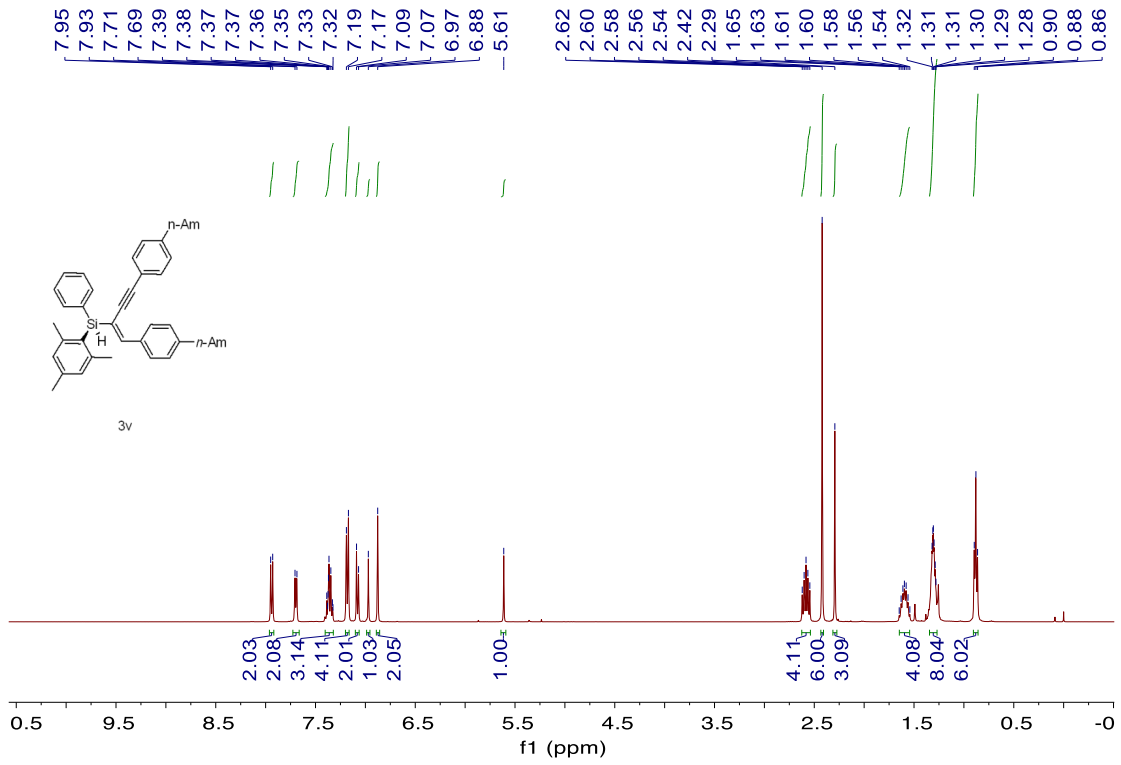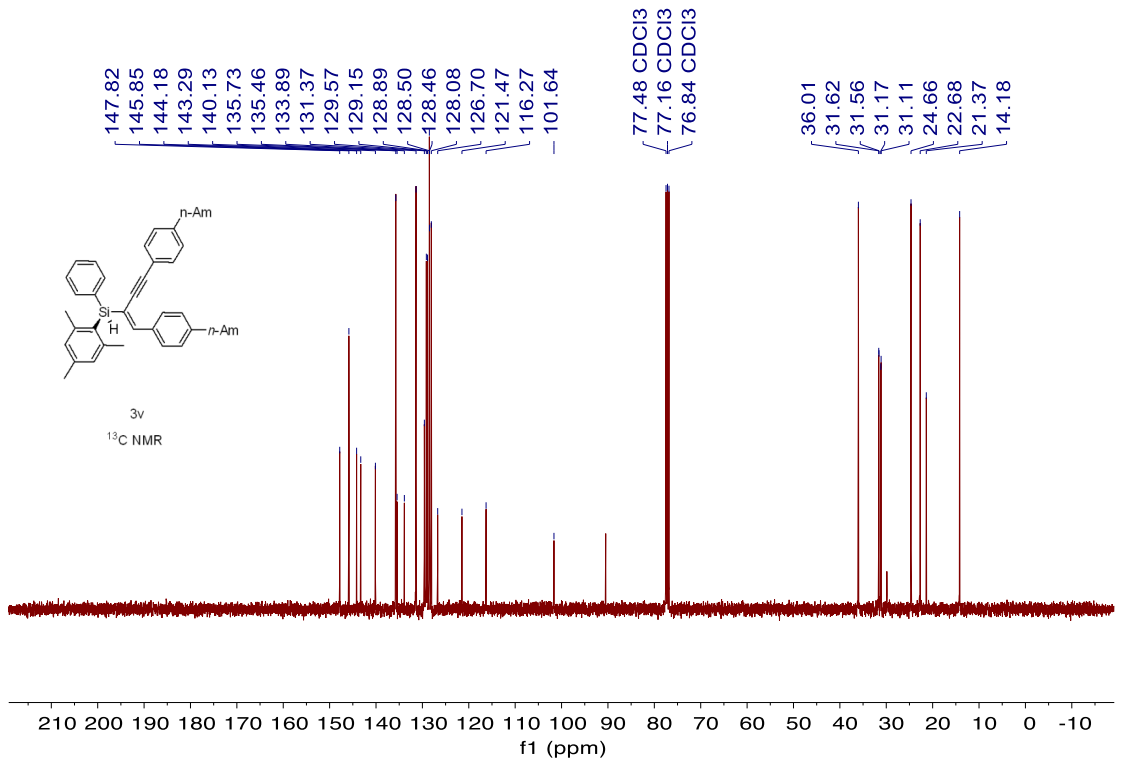

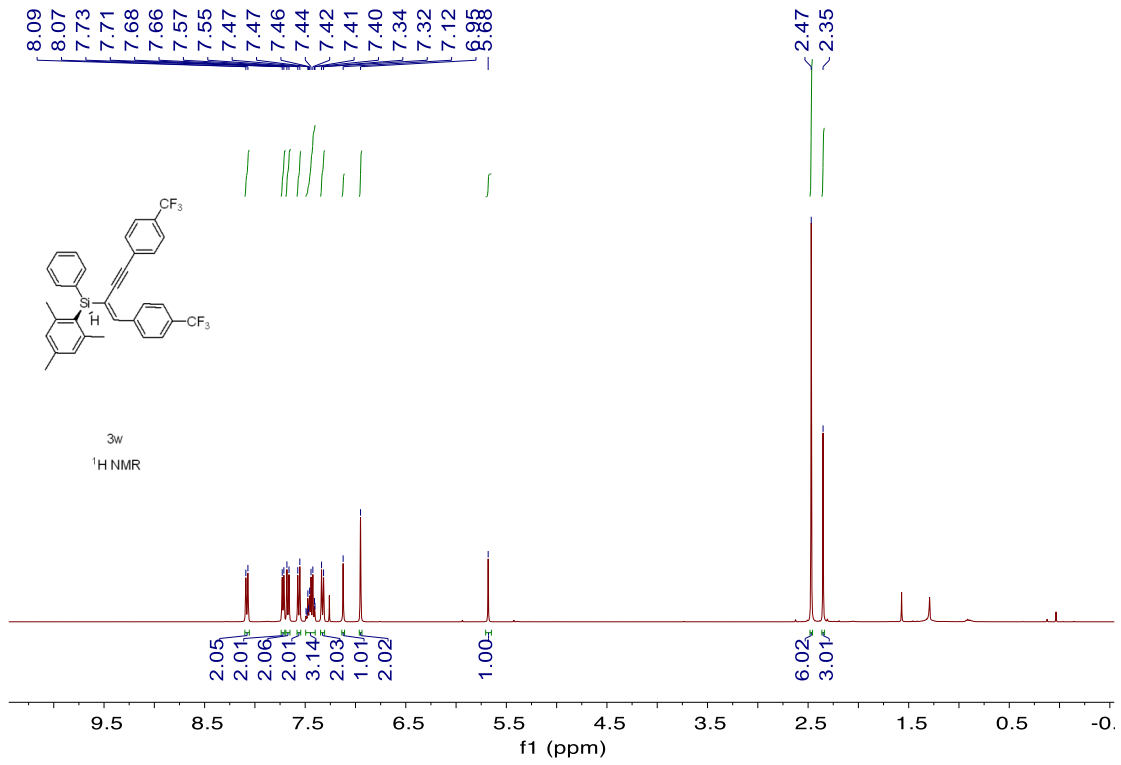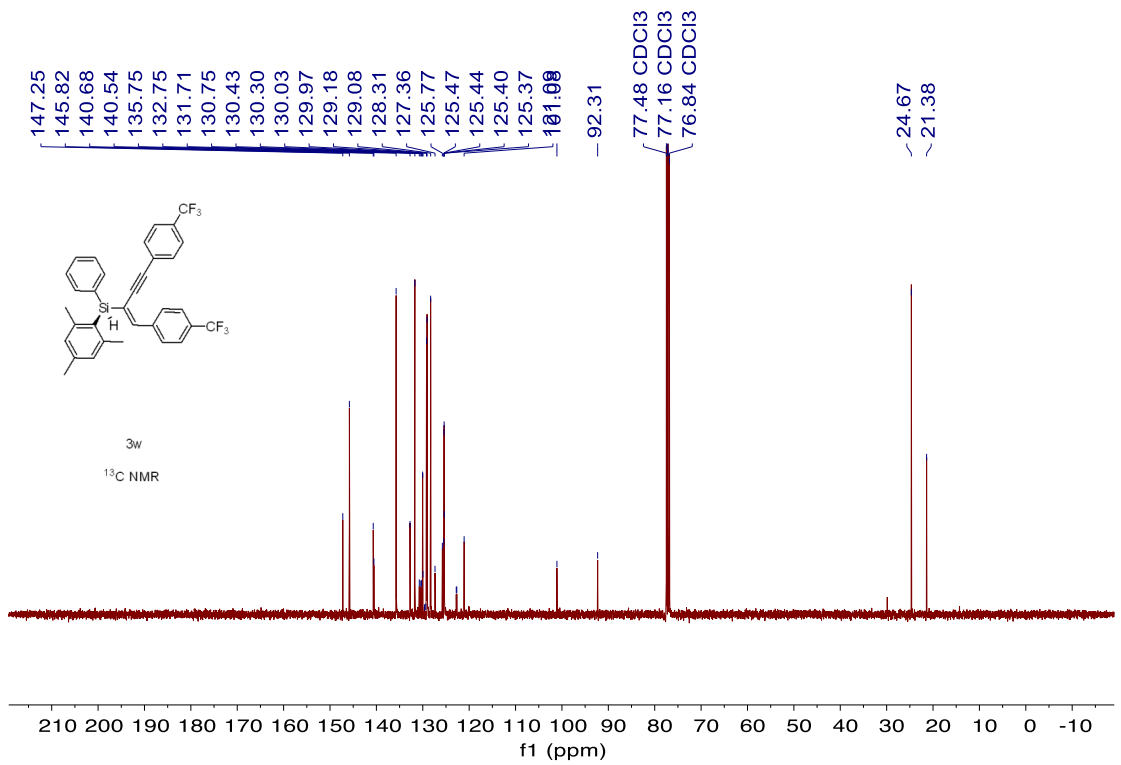

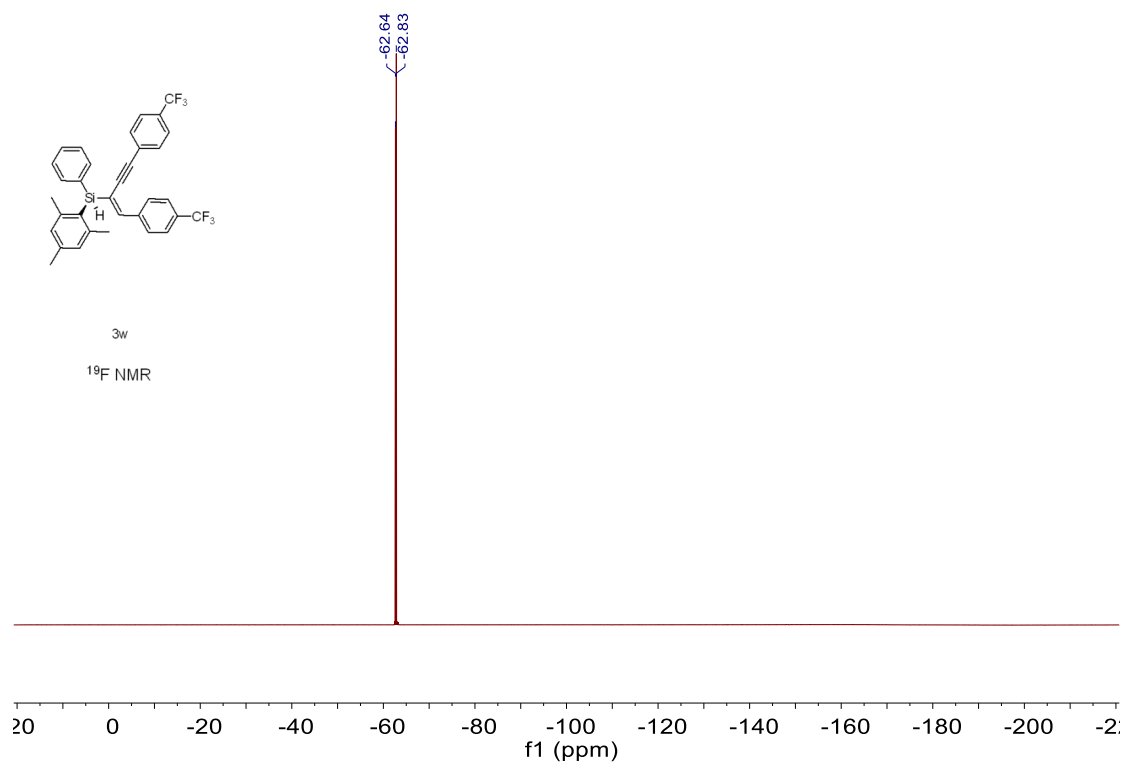



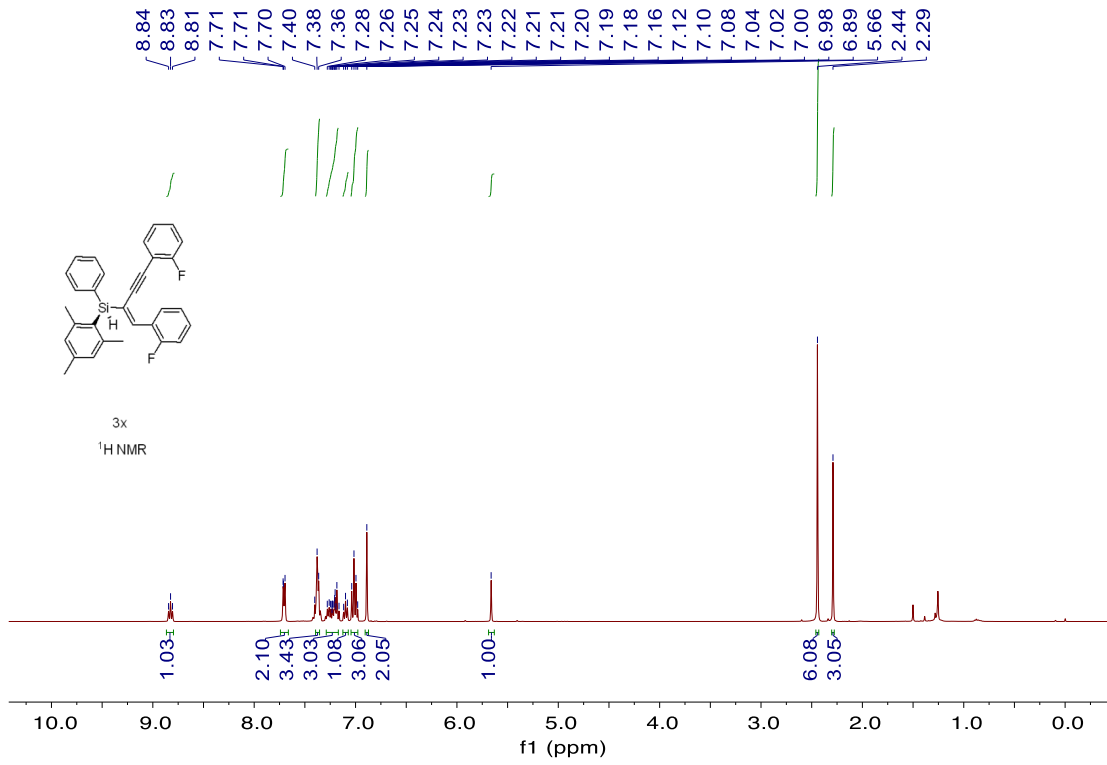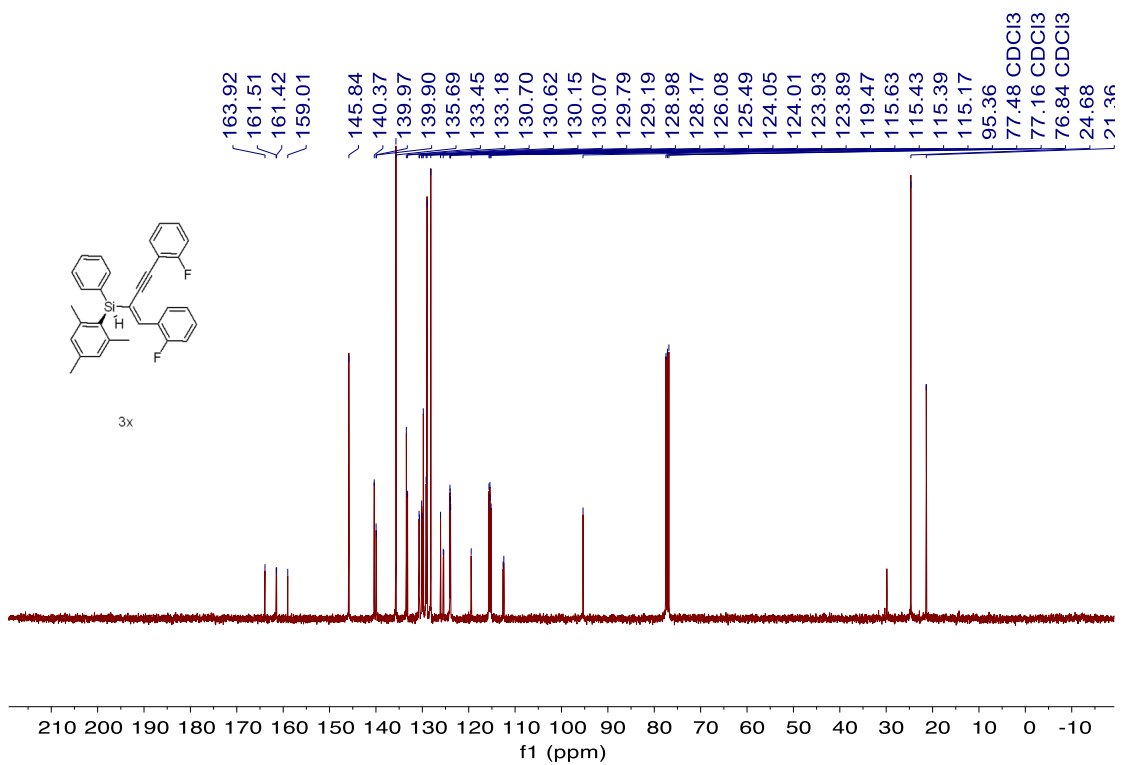

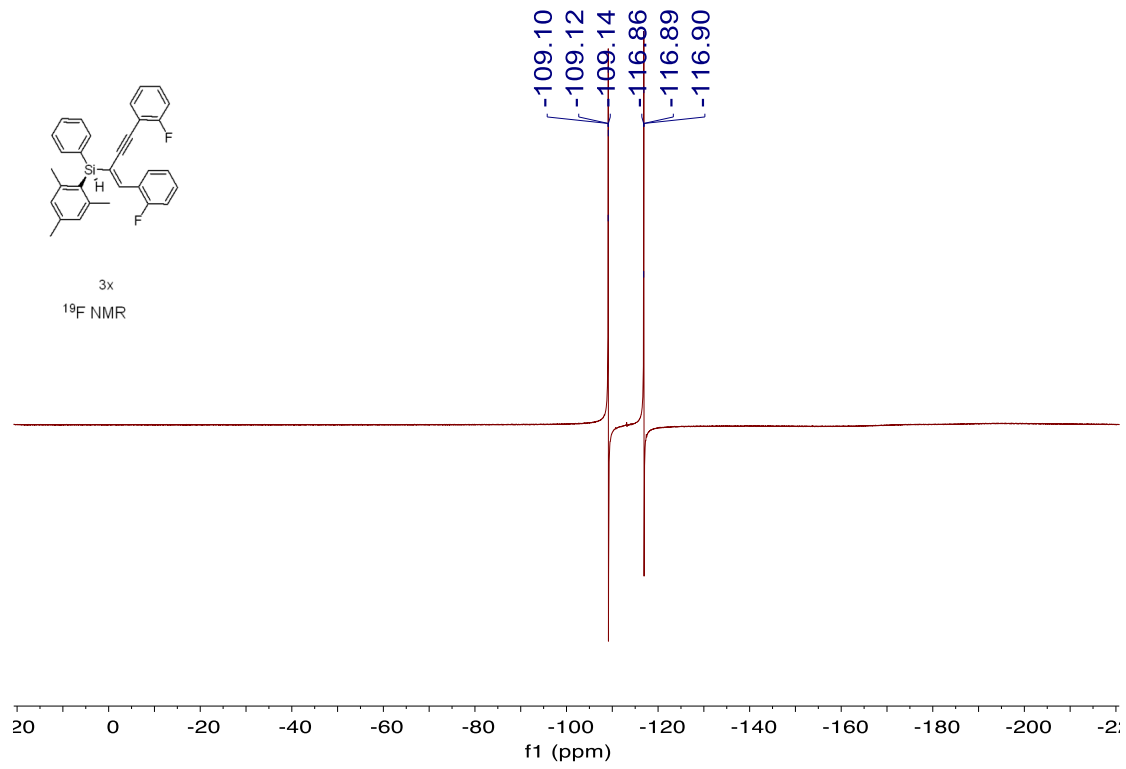

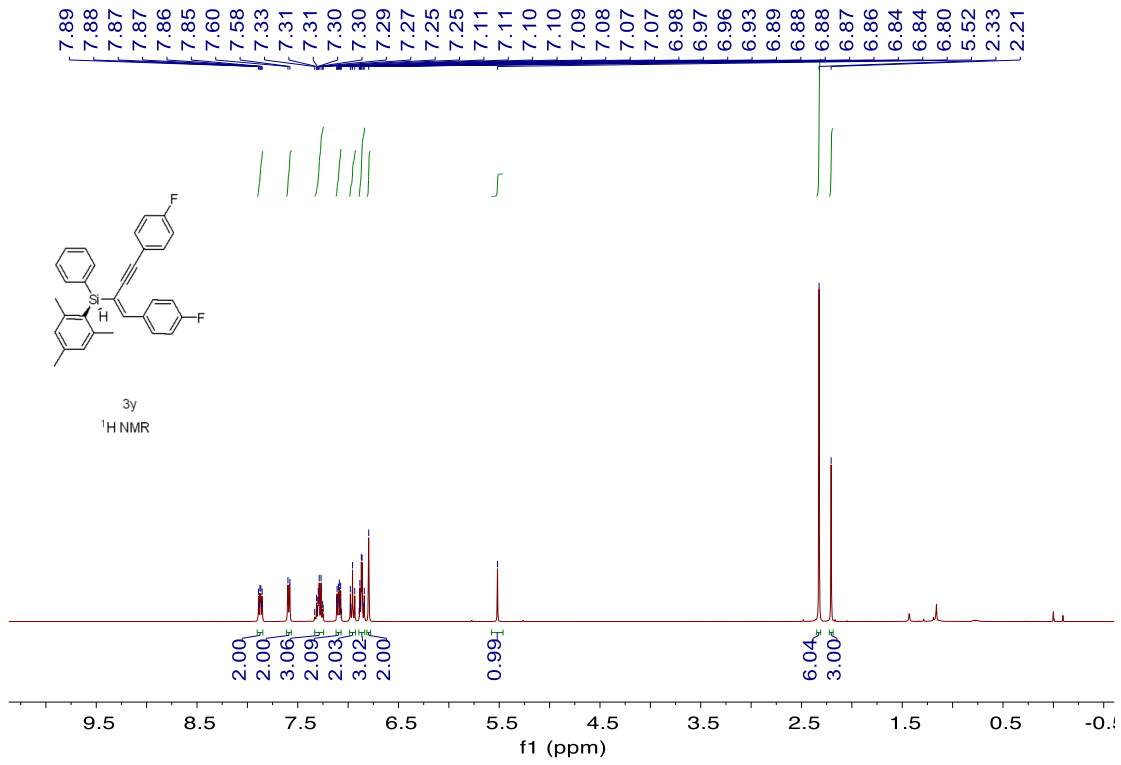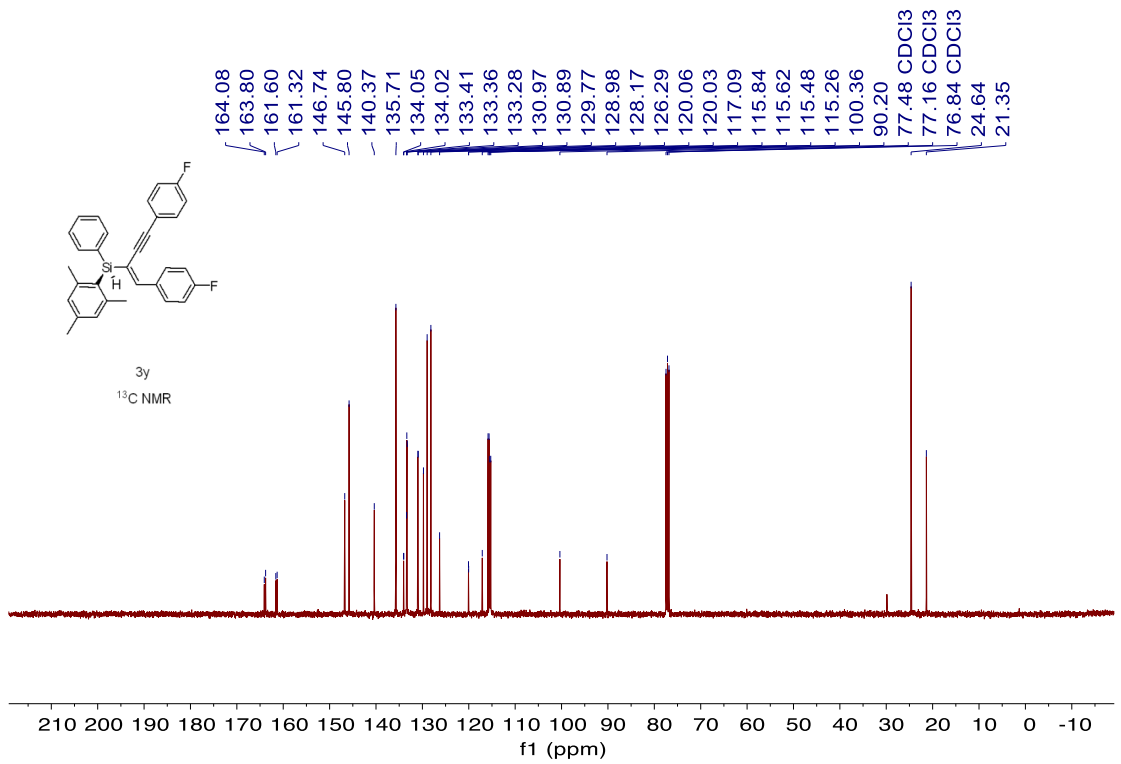

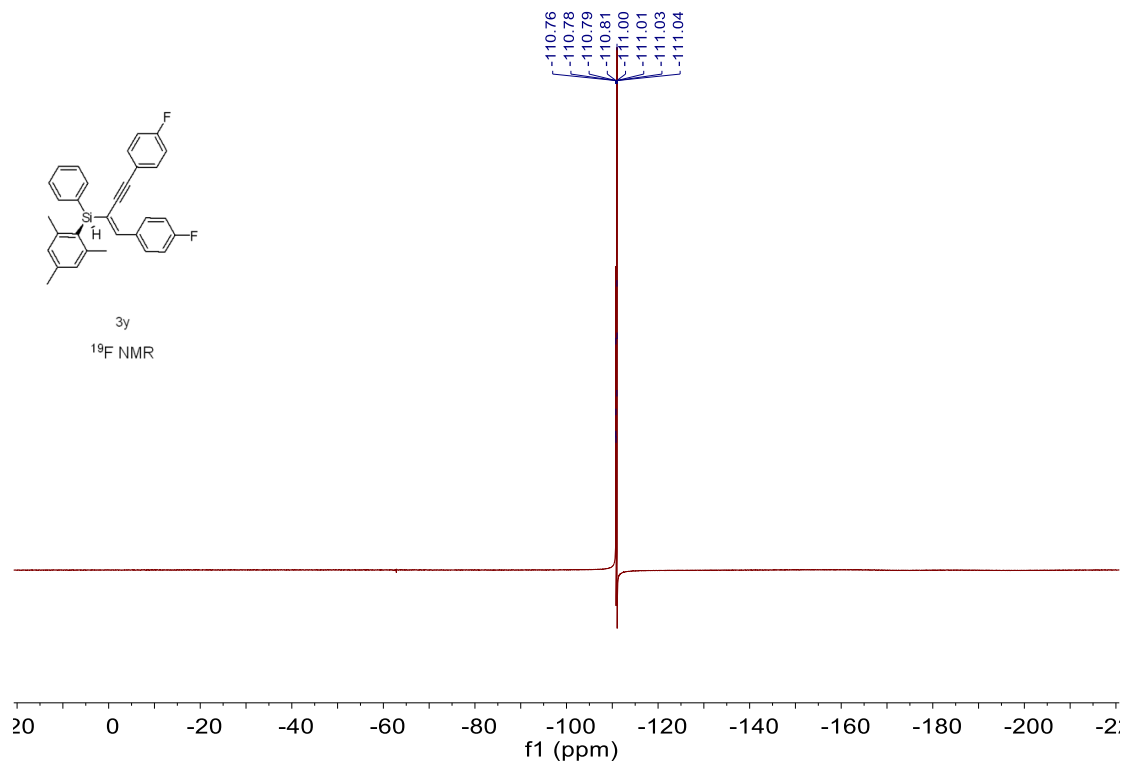

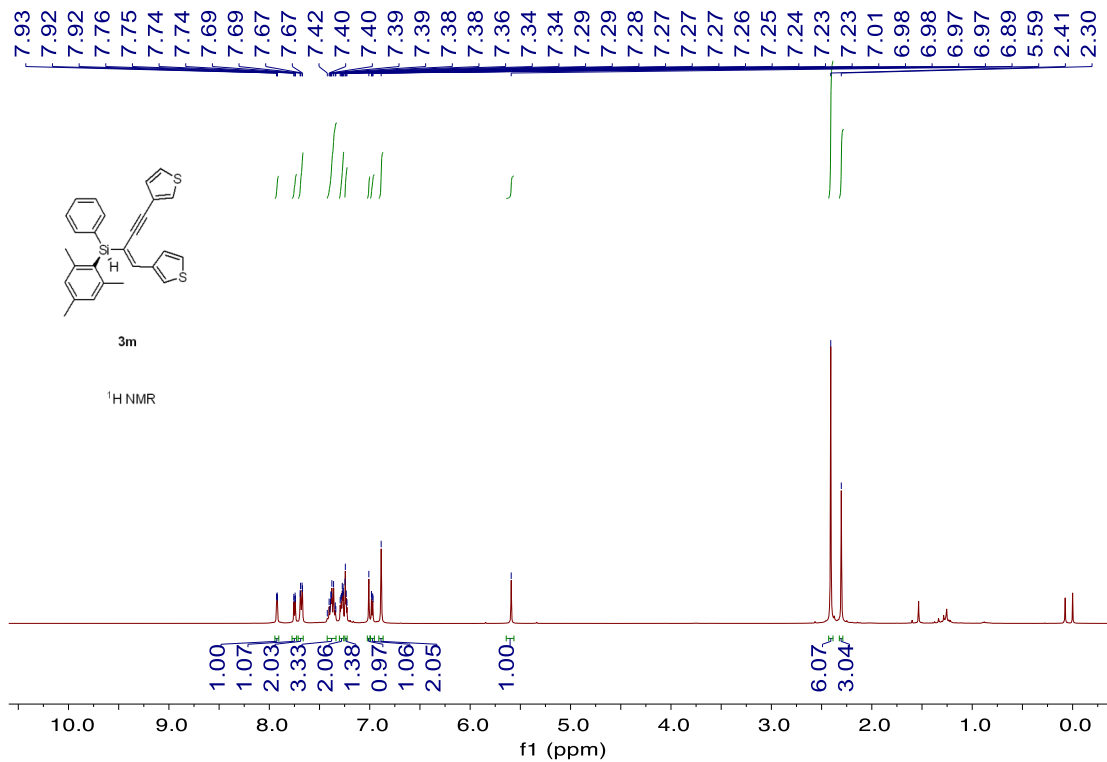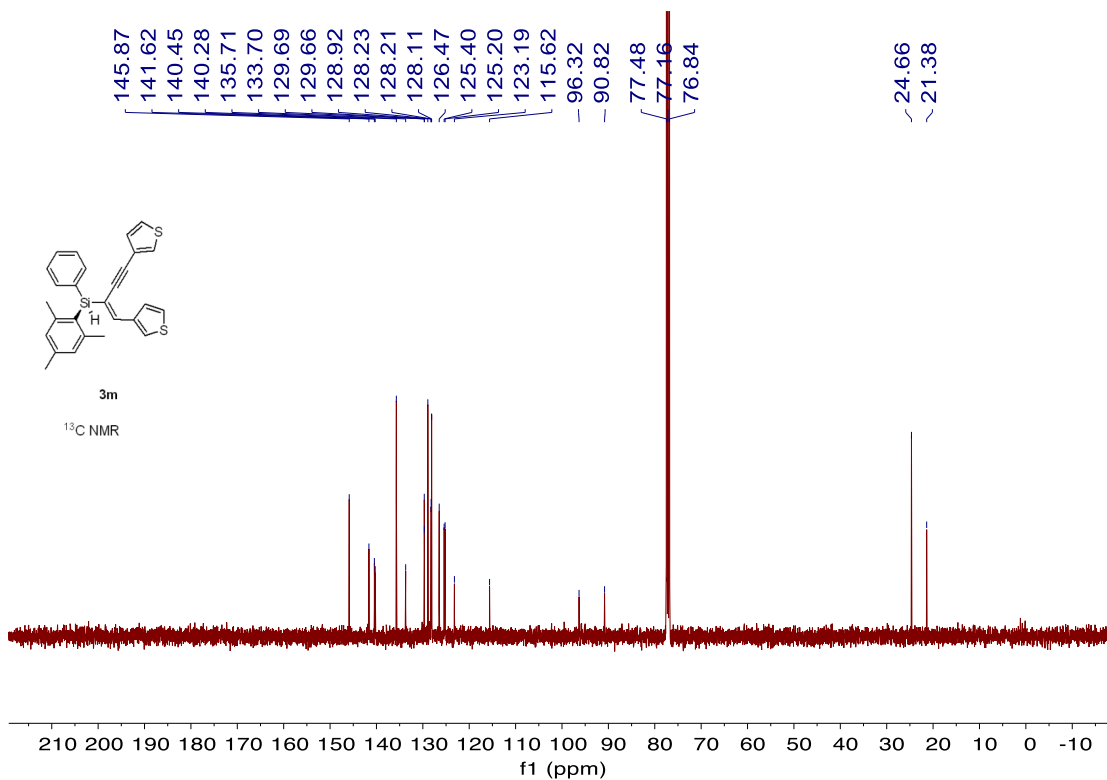

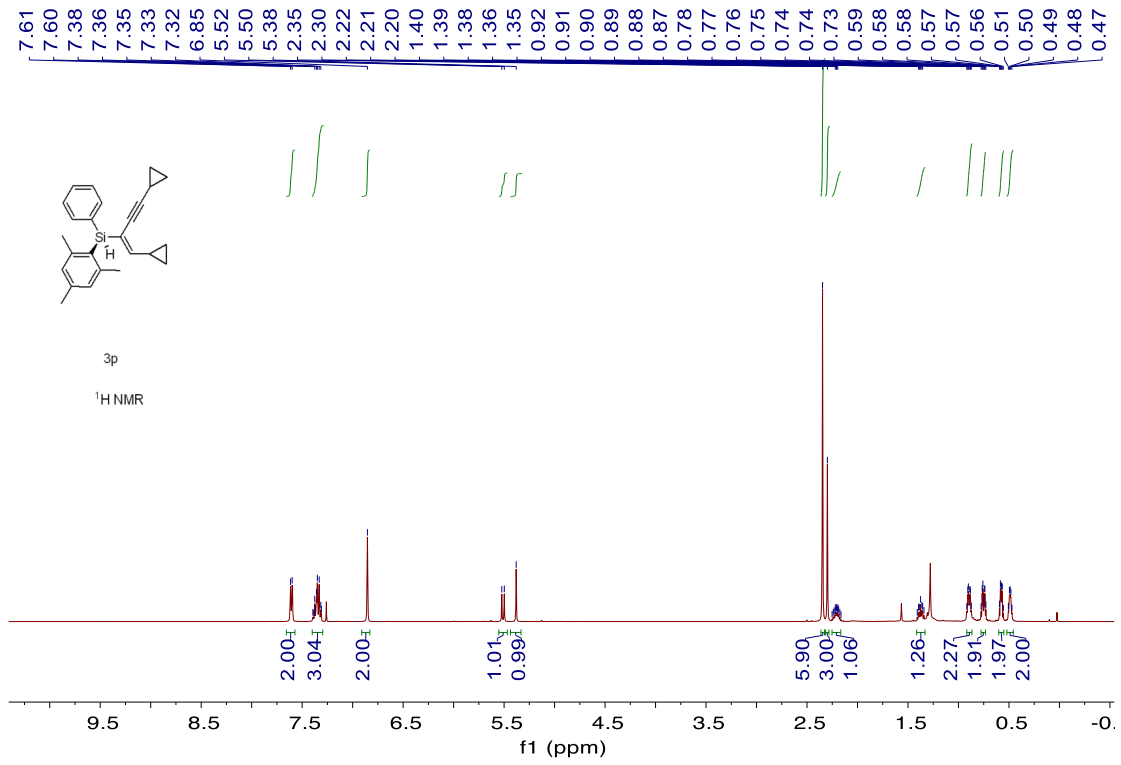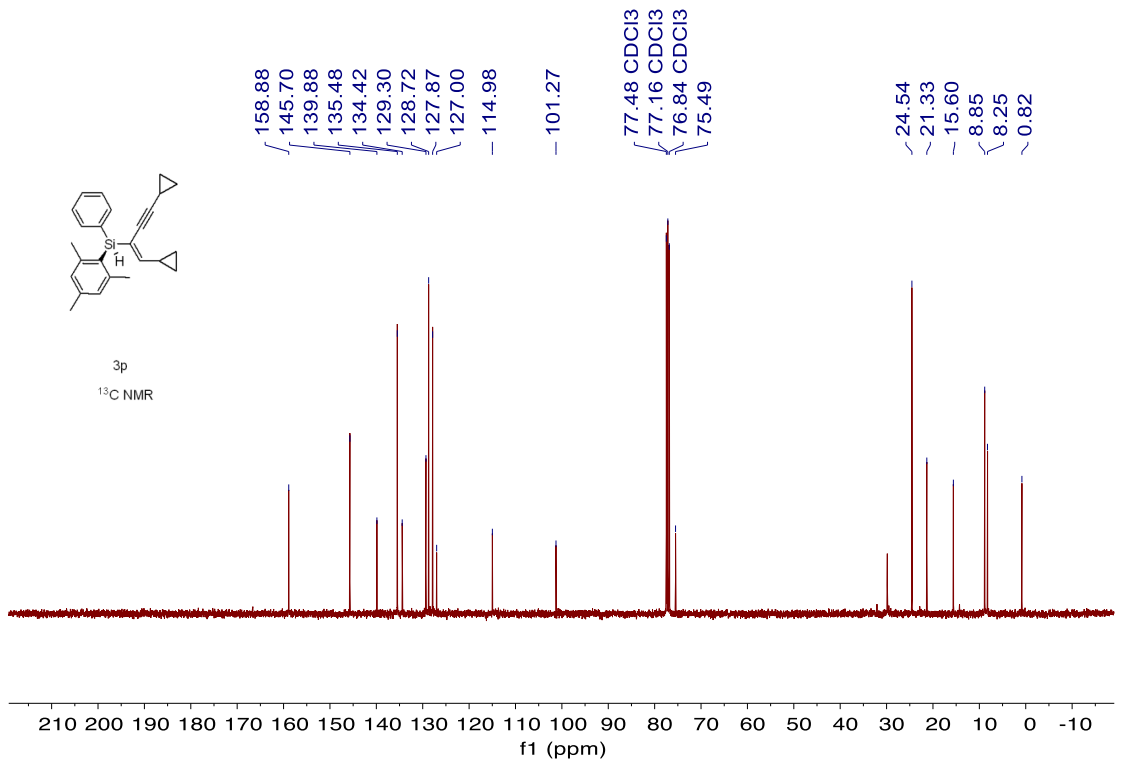

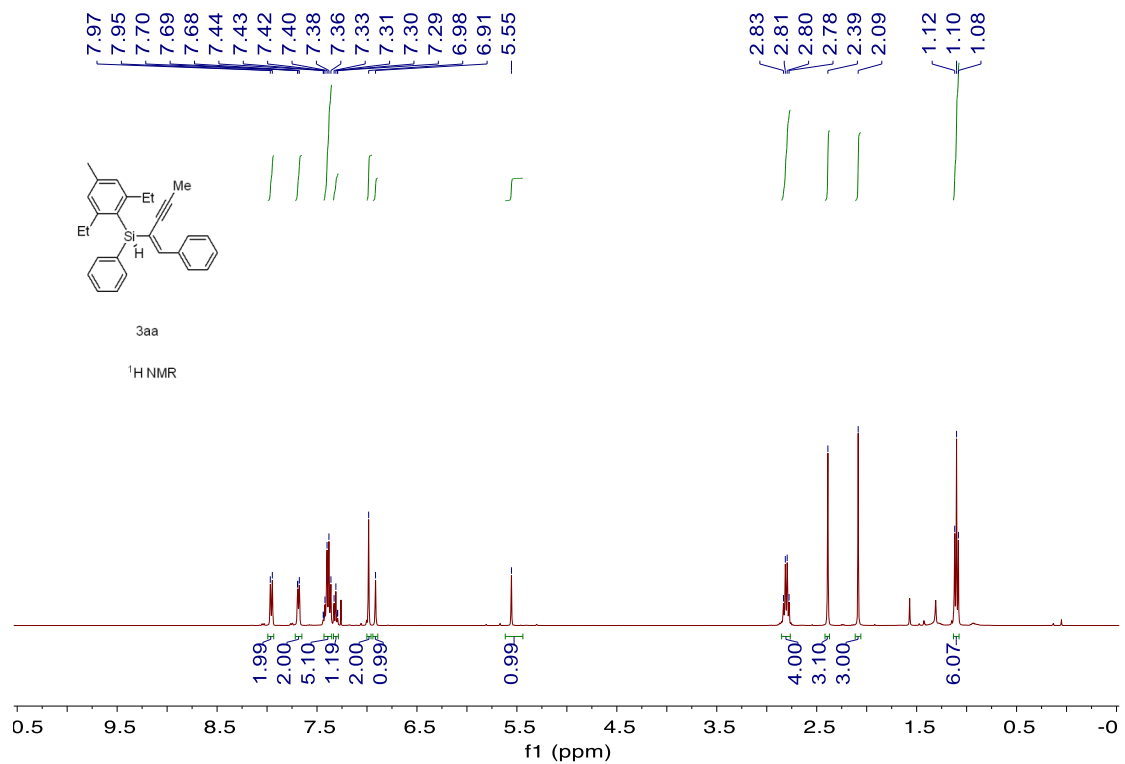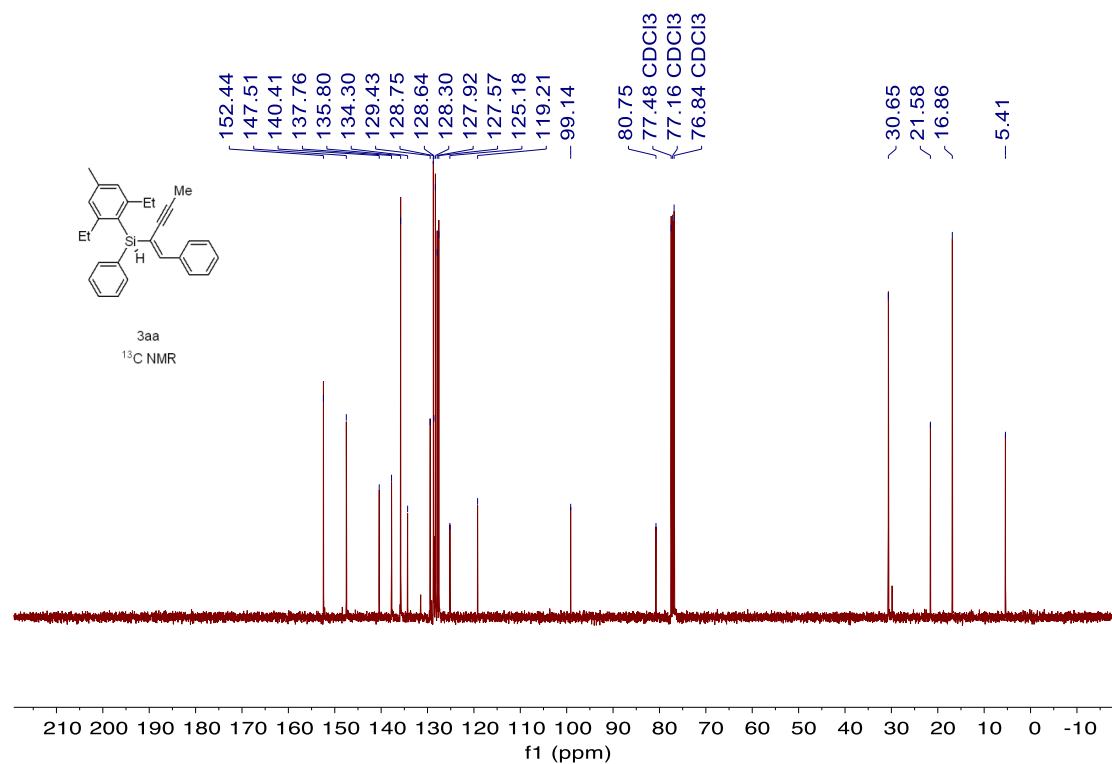

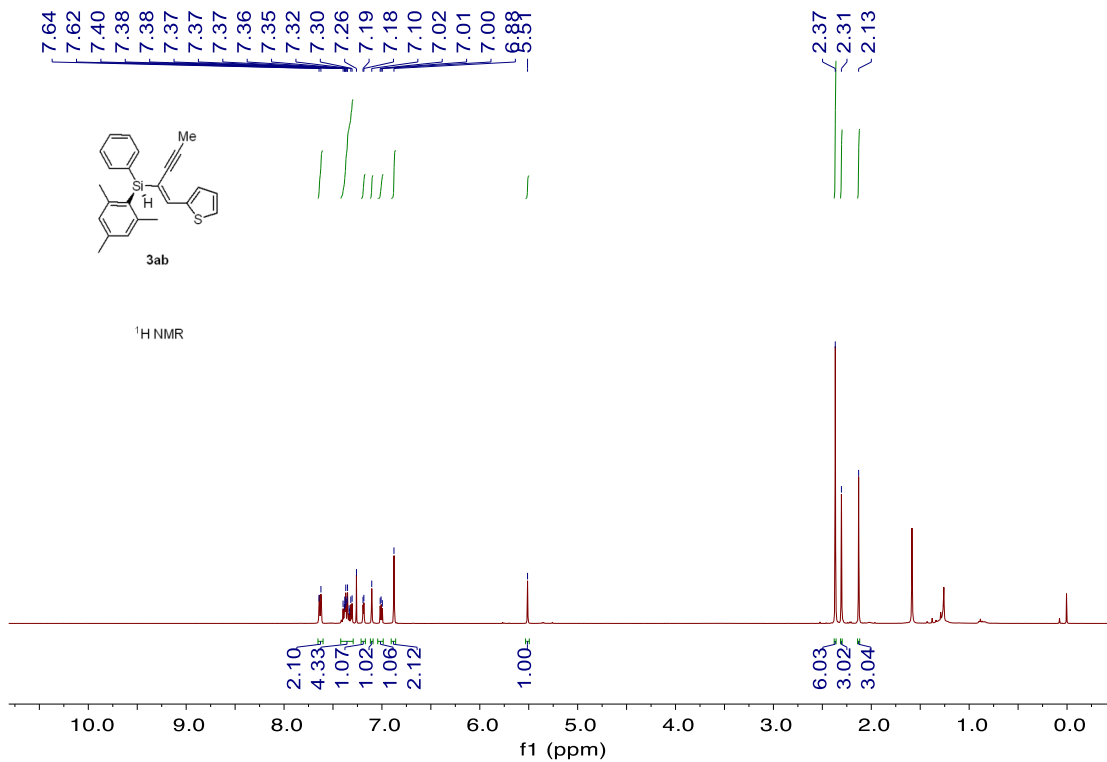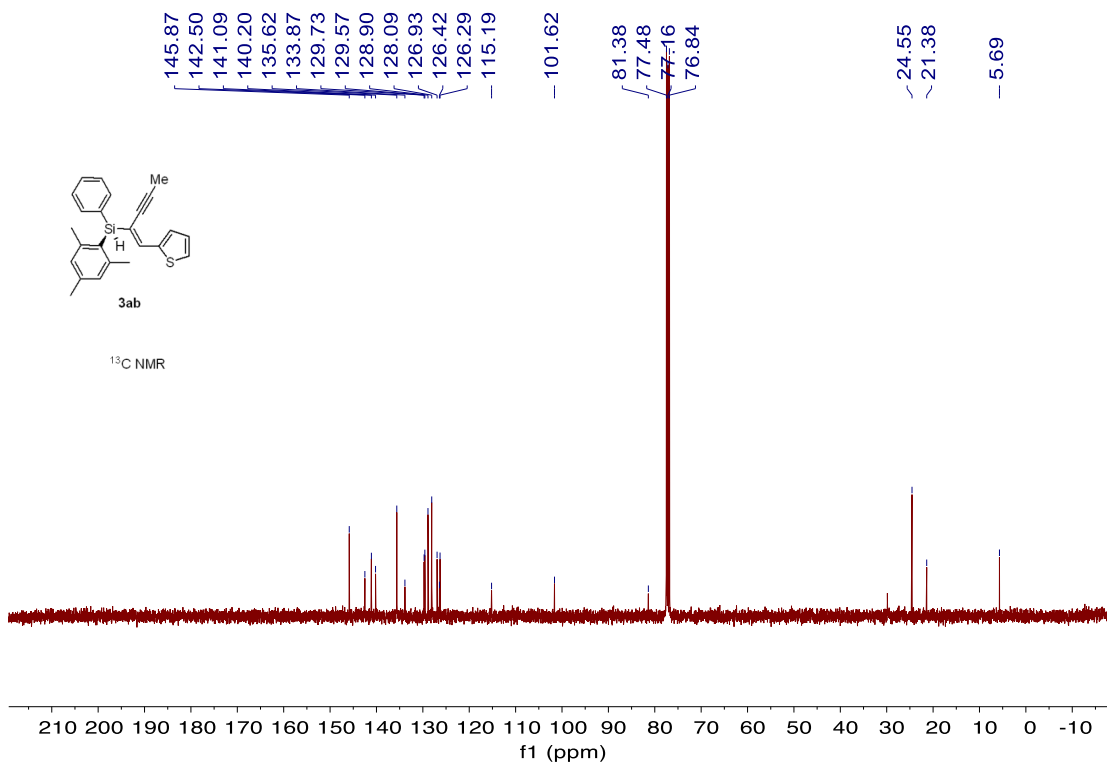



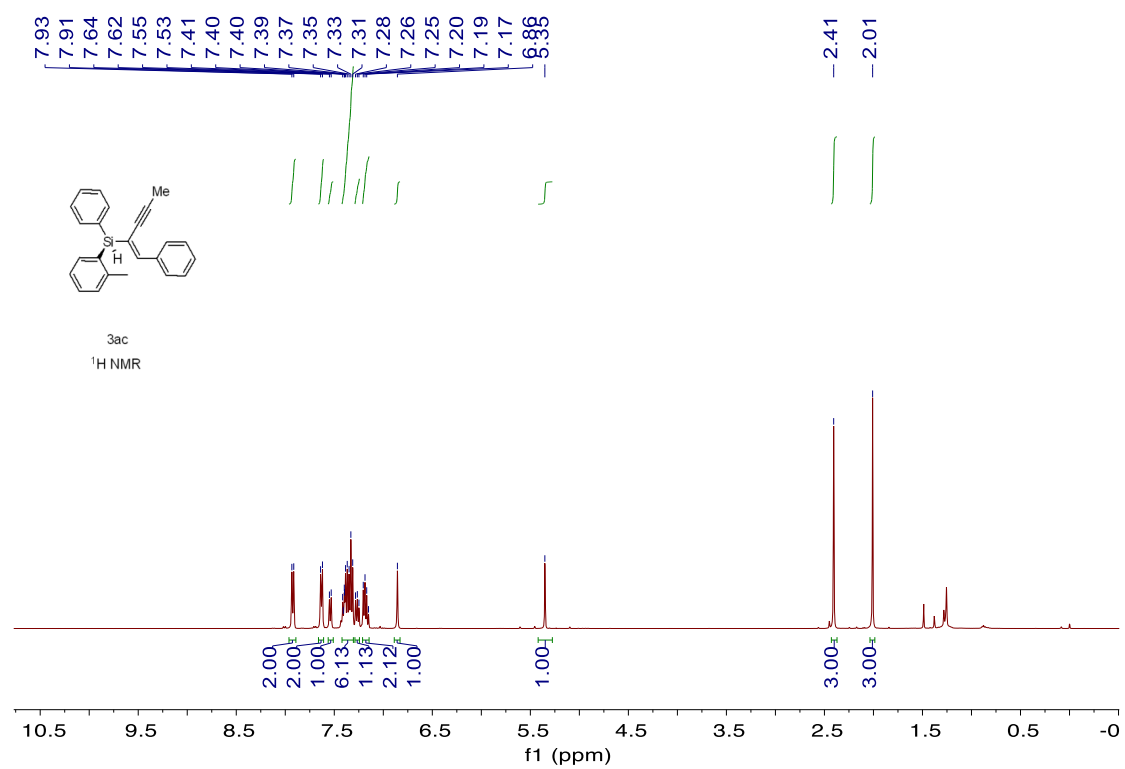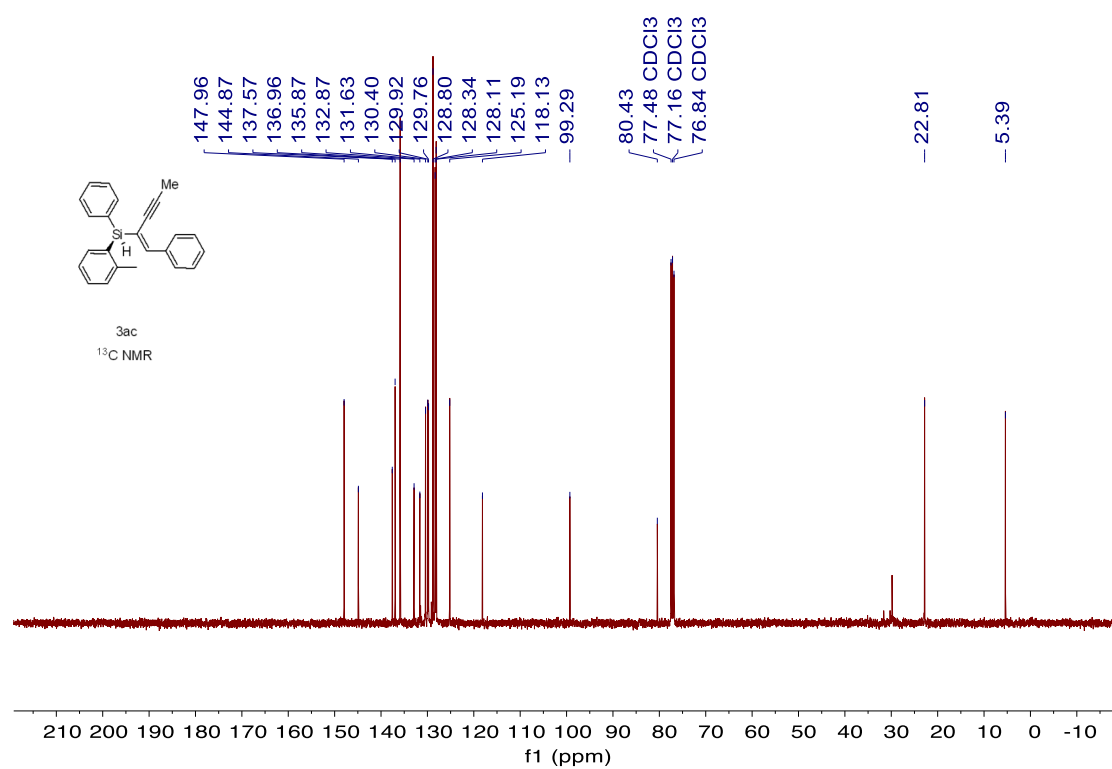

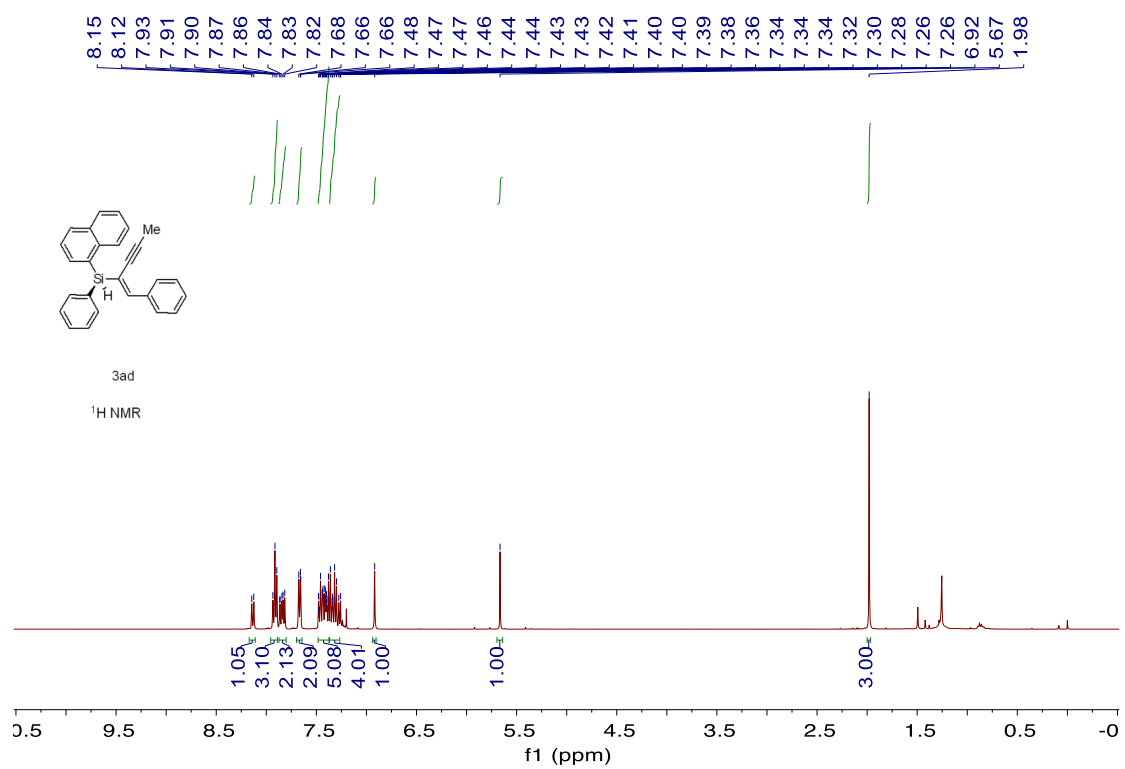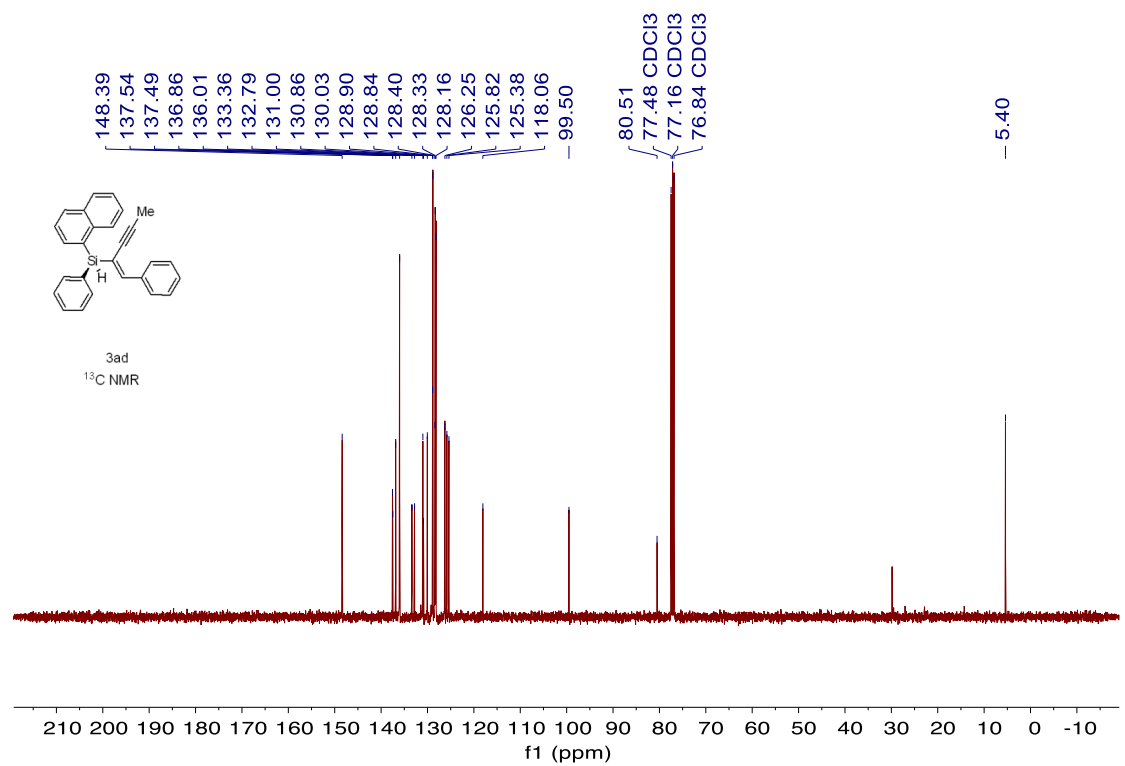

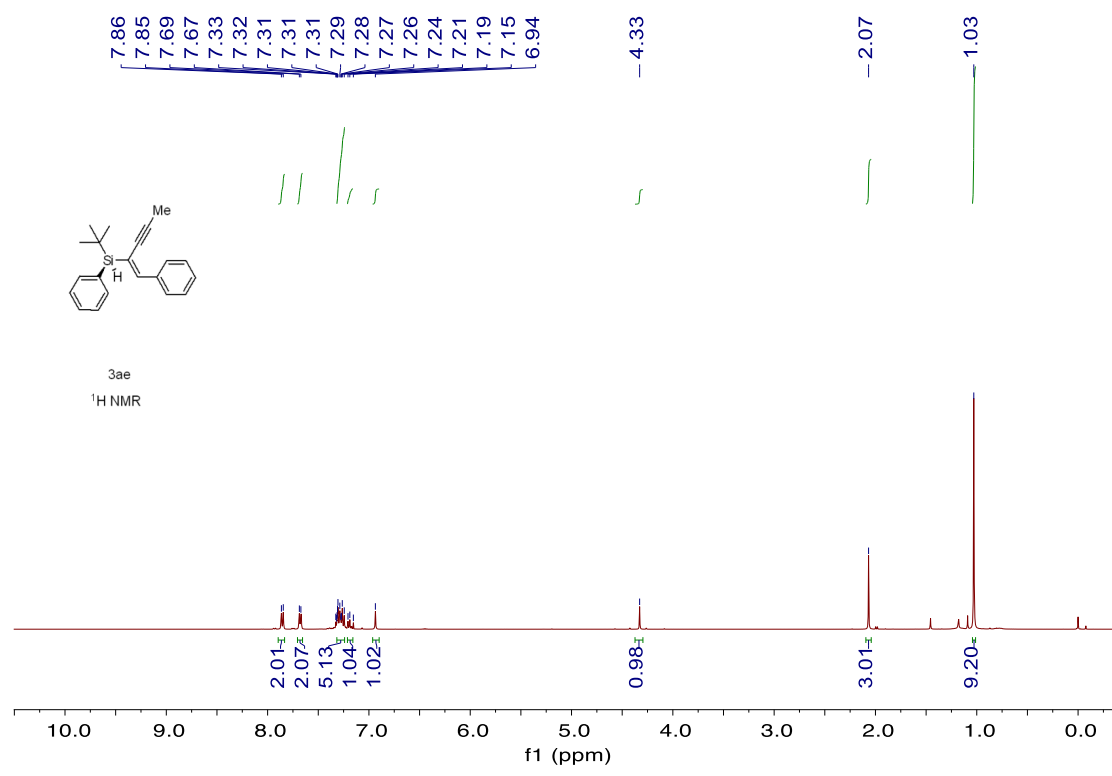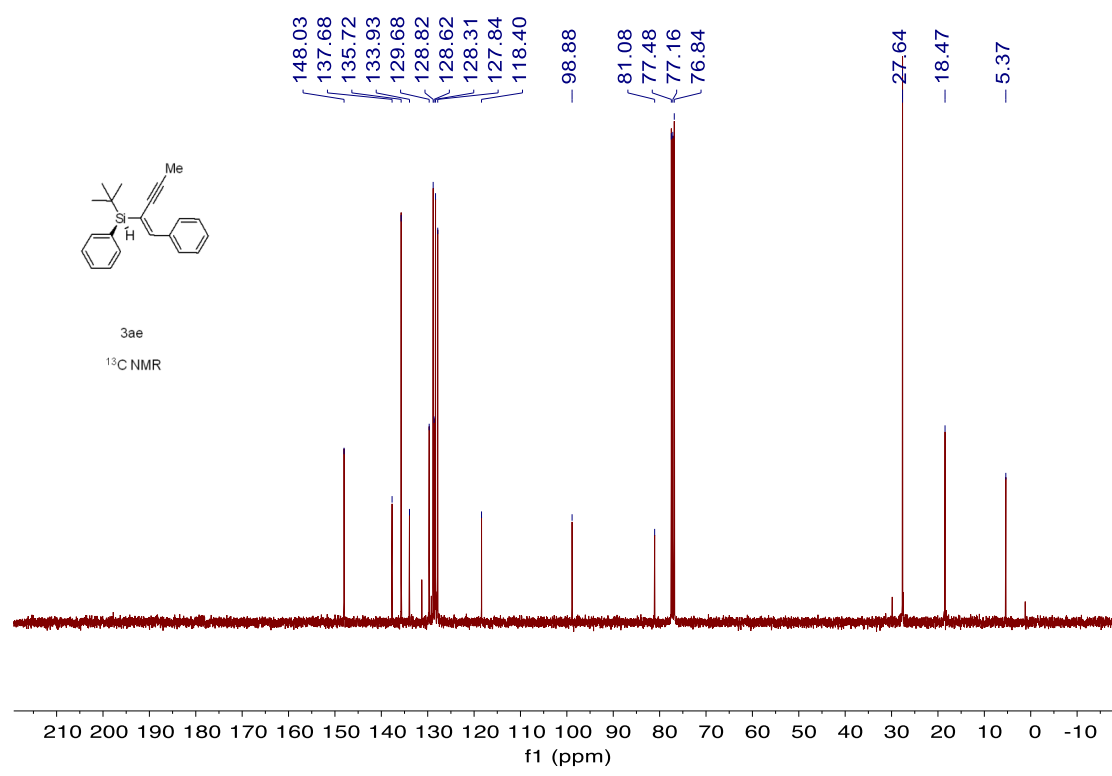

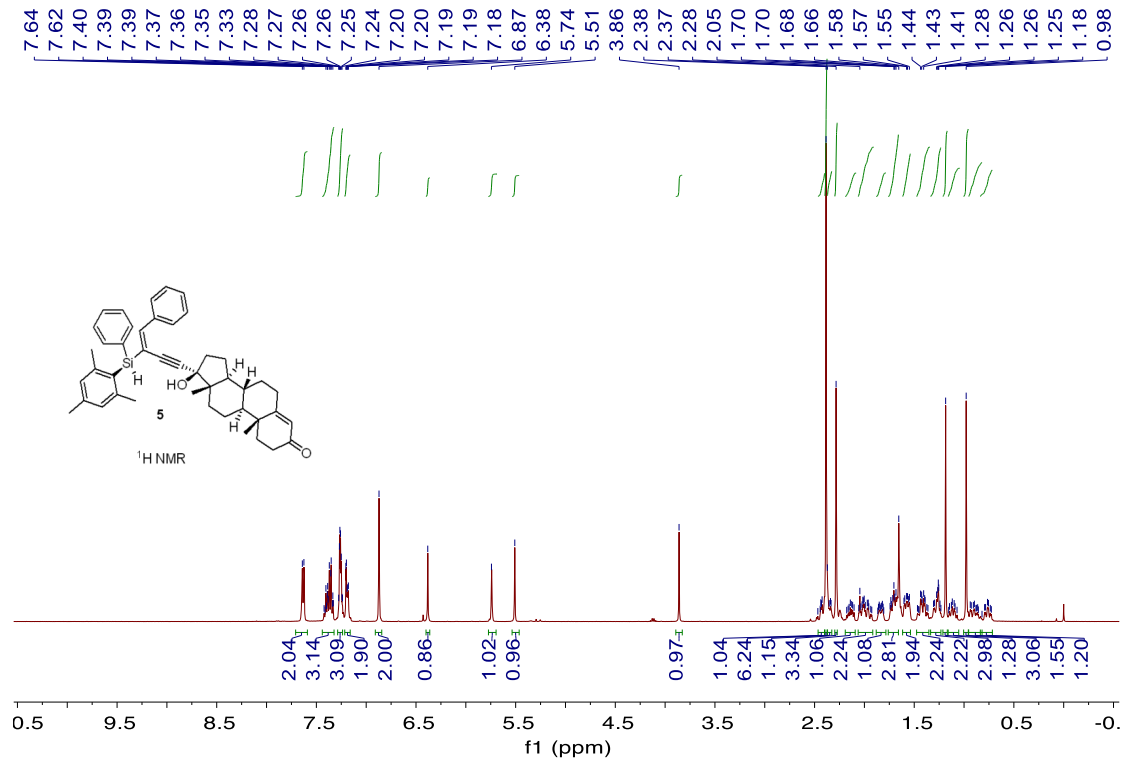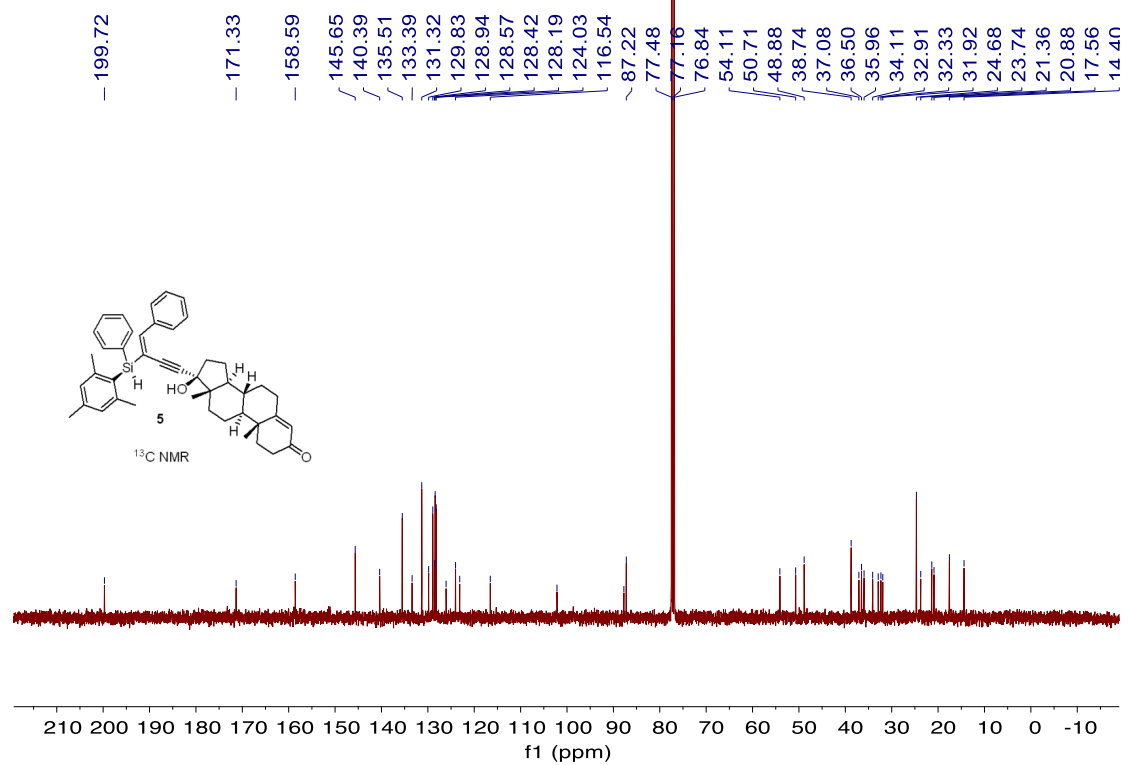

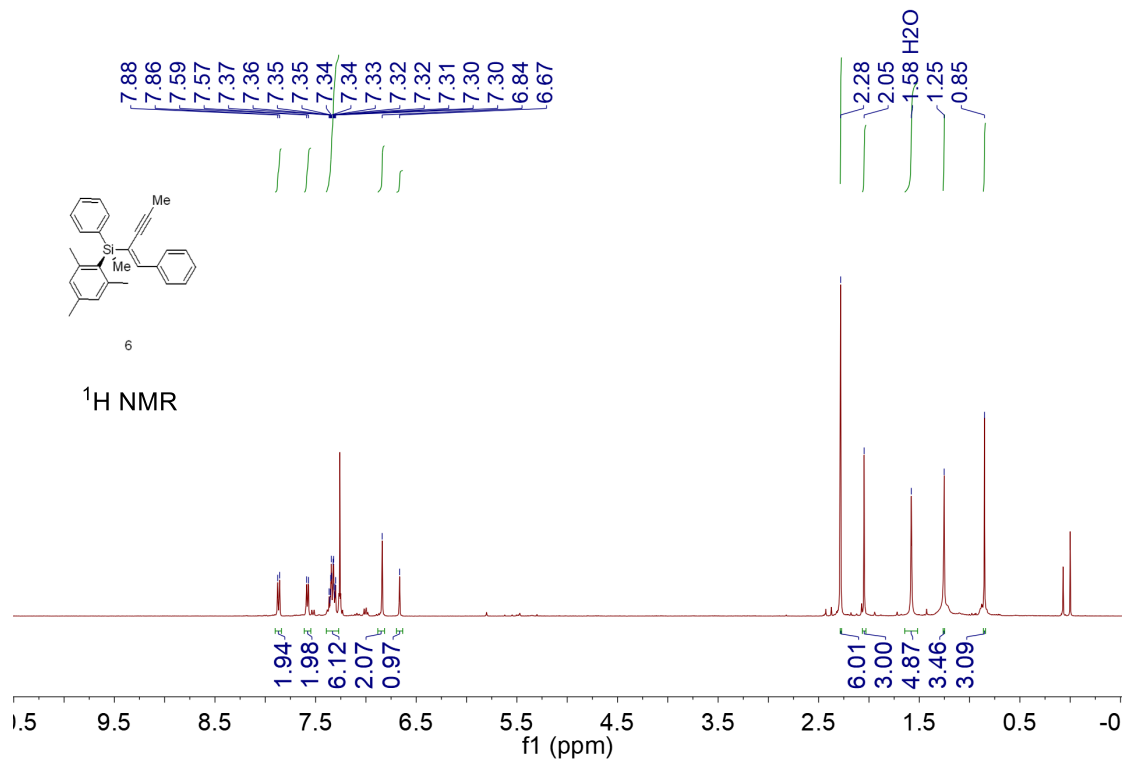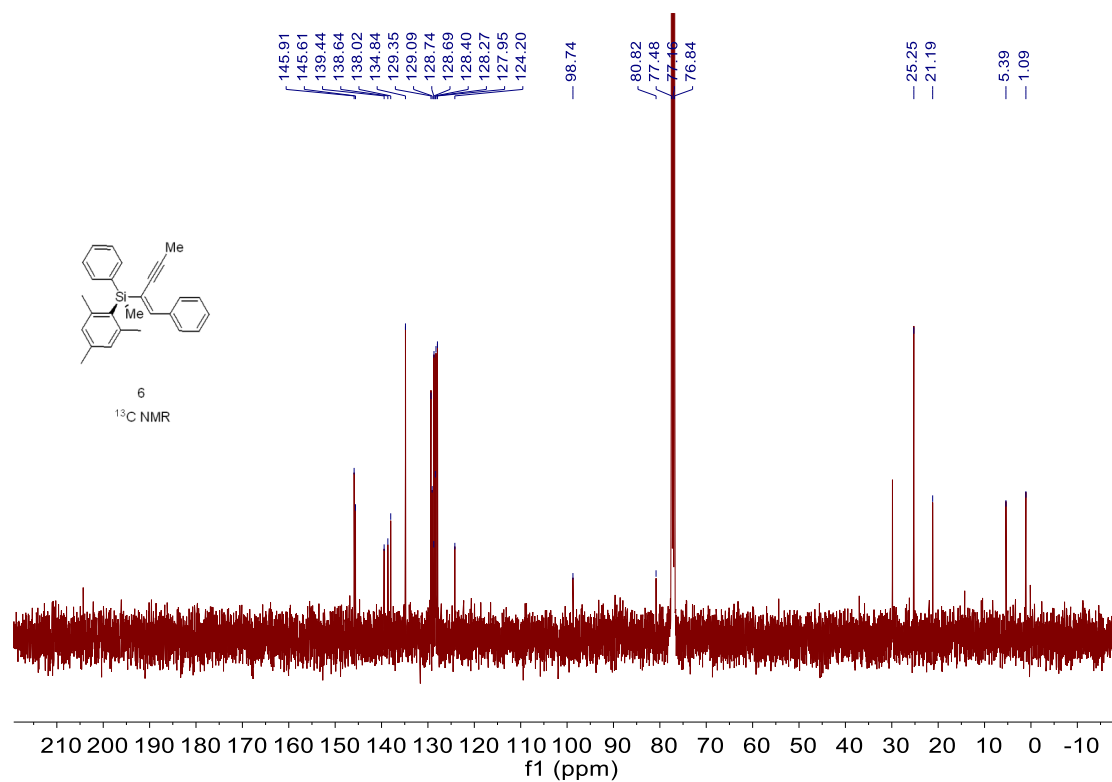

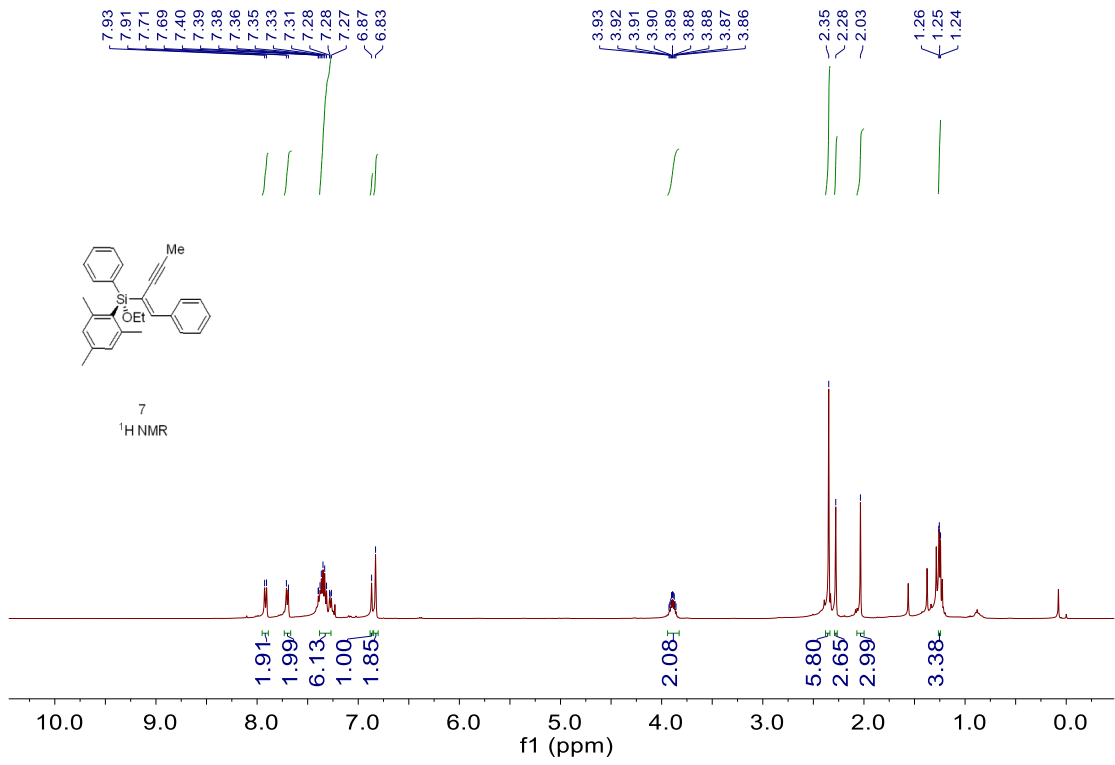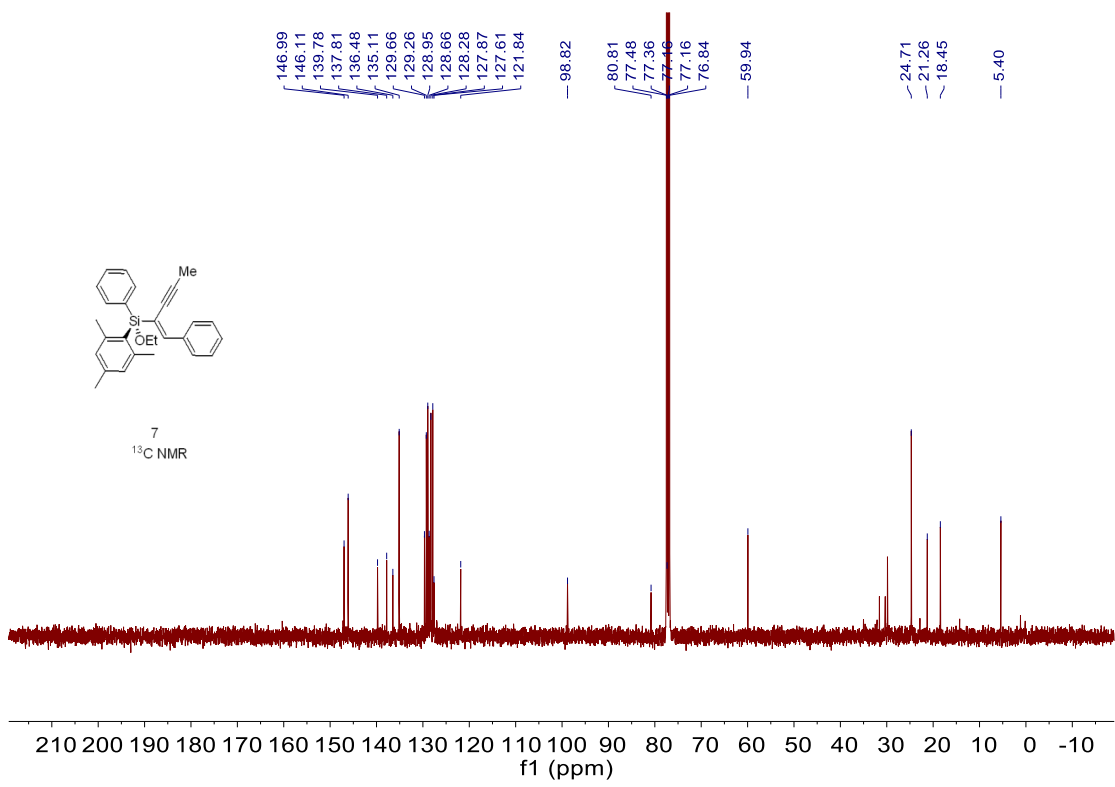

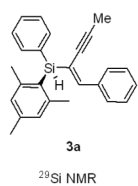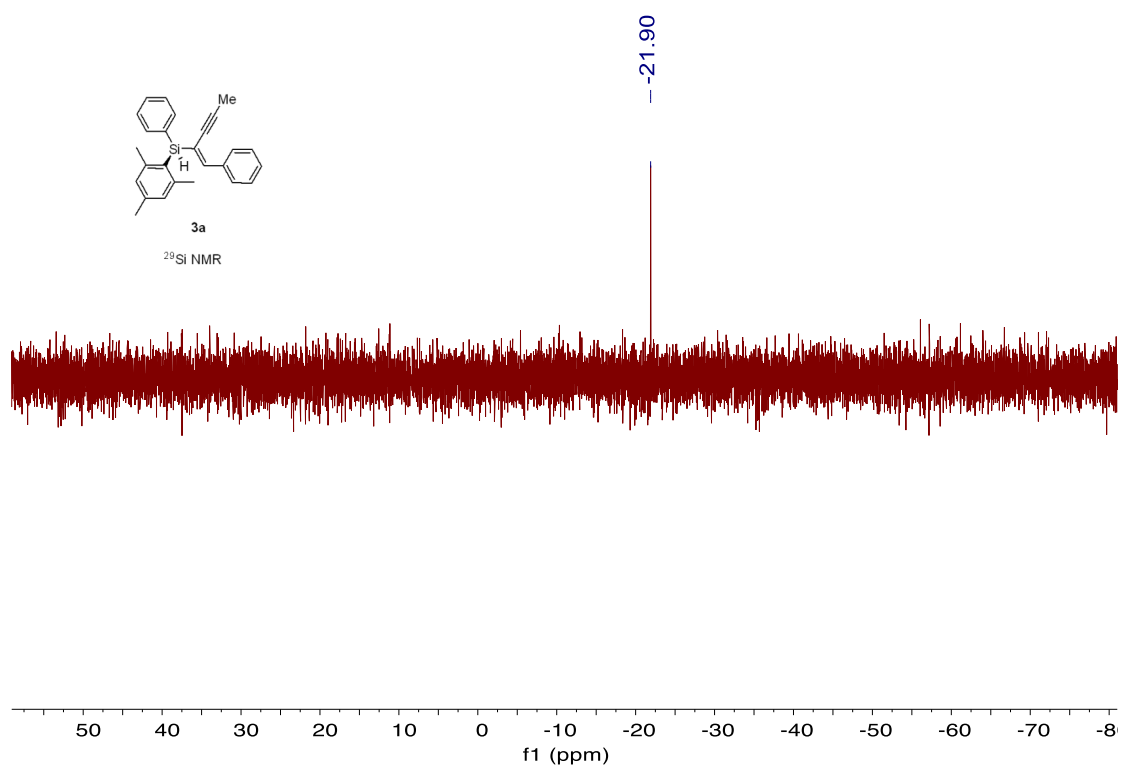

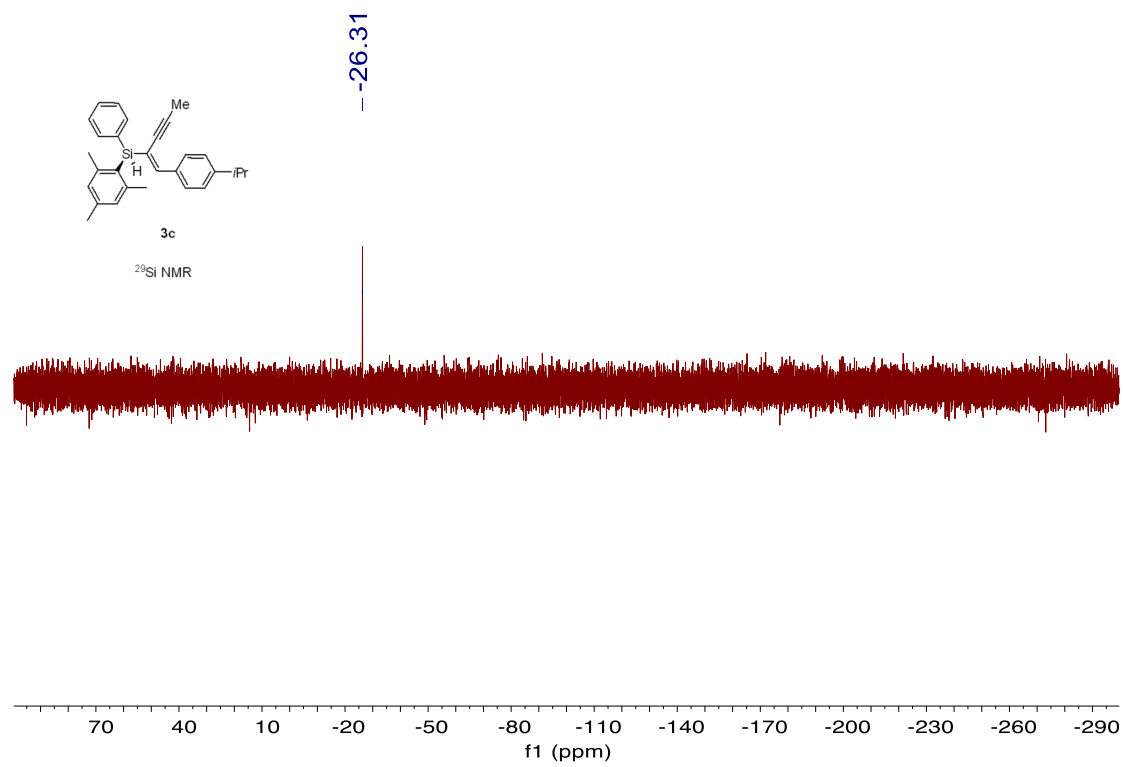



--26.86

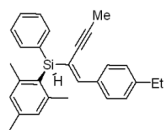

3d

<sup>29</sup>Si NMR

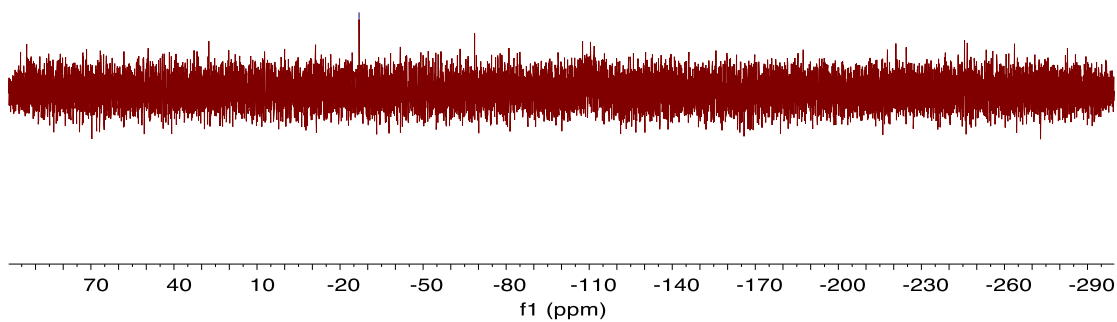

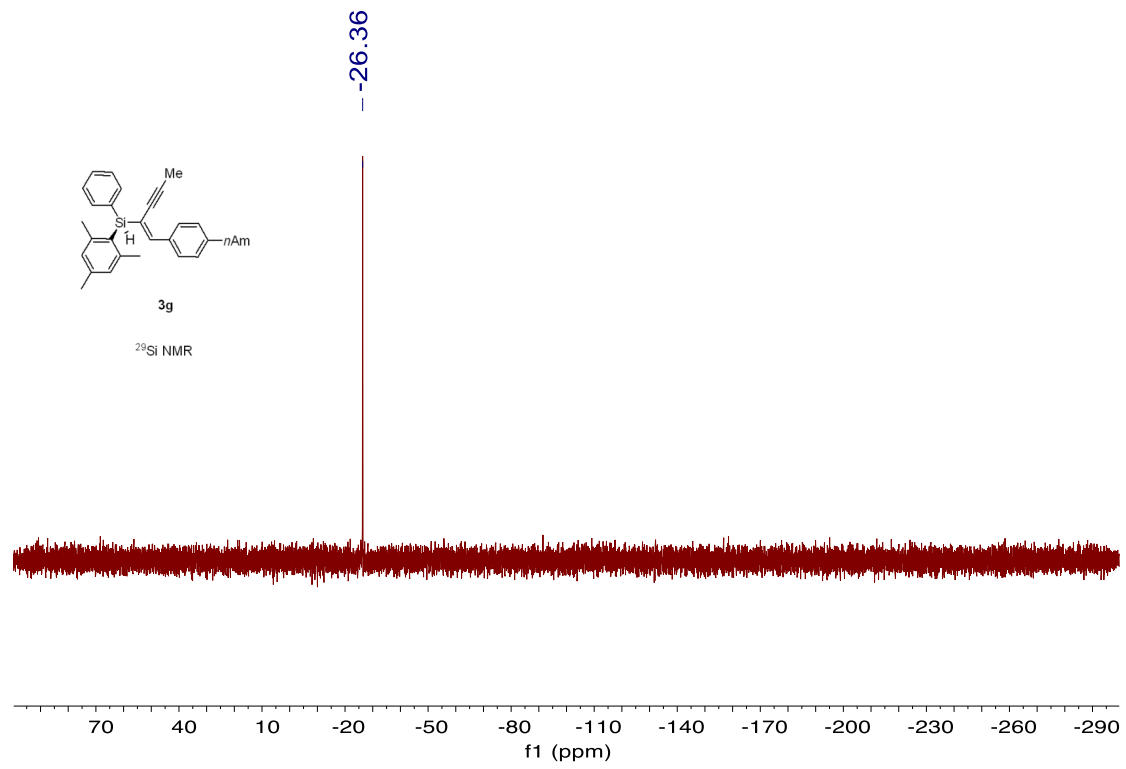

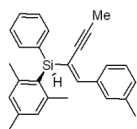

3i

<sup>29</sup>Si NMR

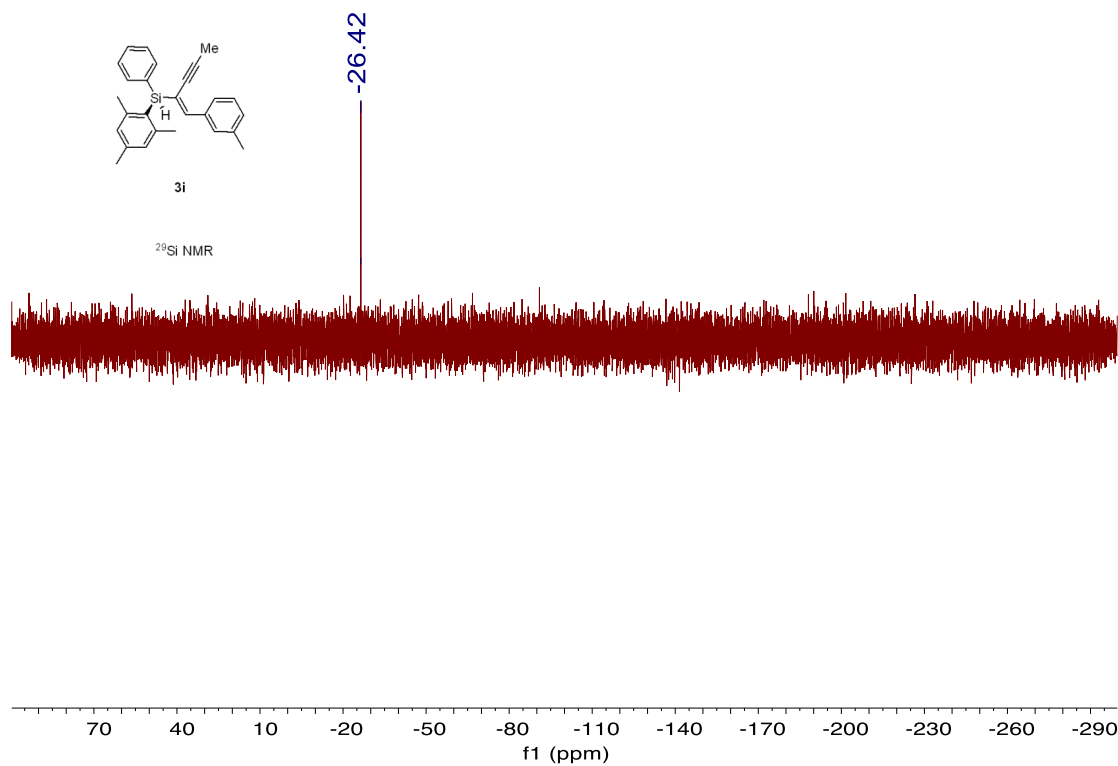

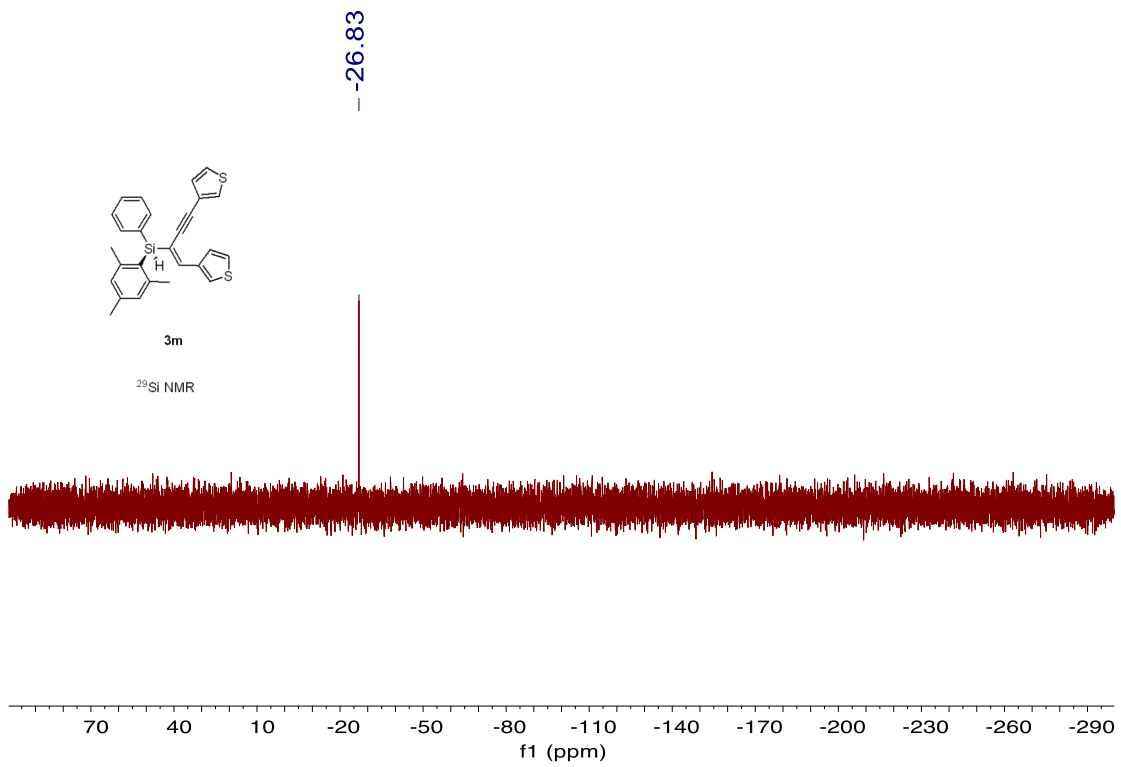

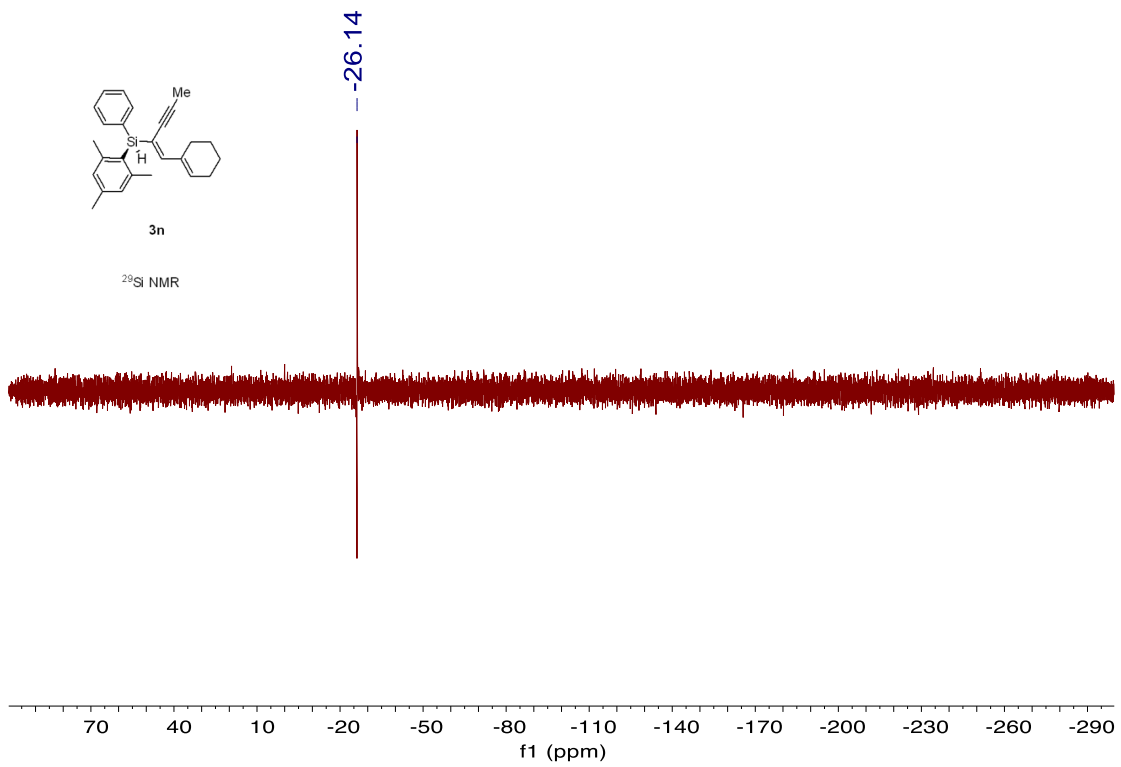

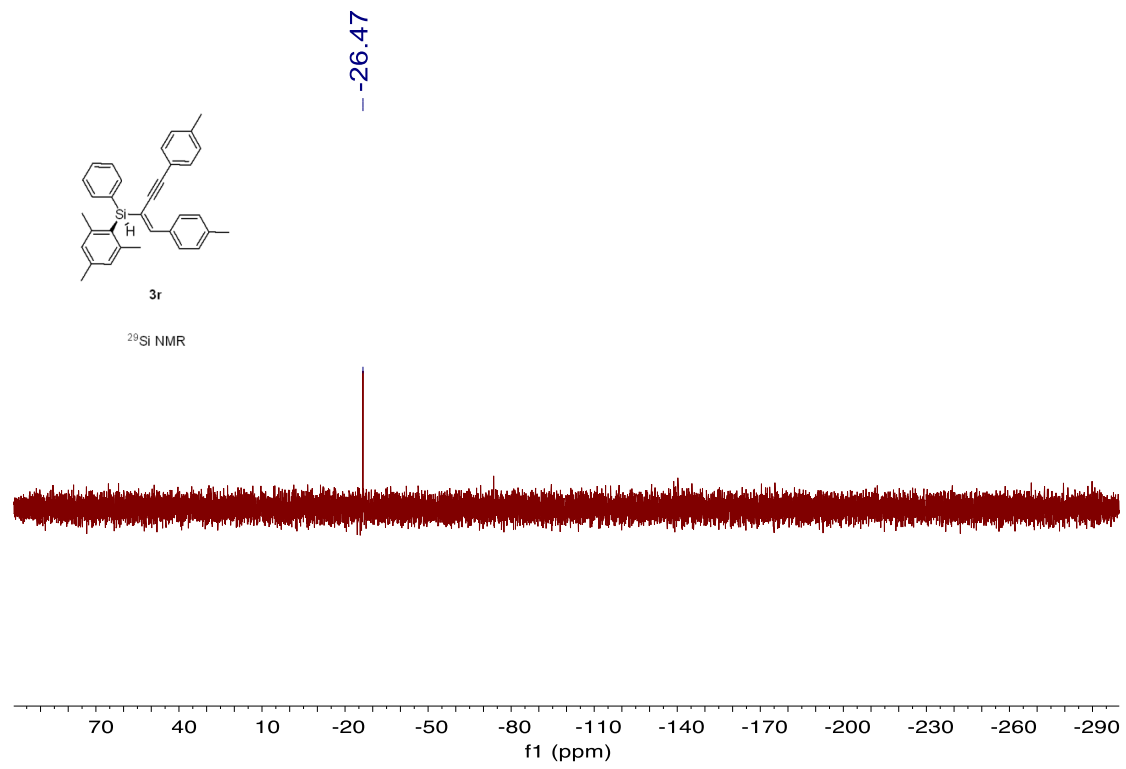

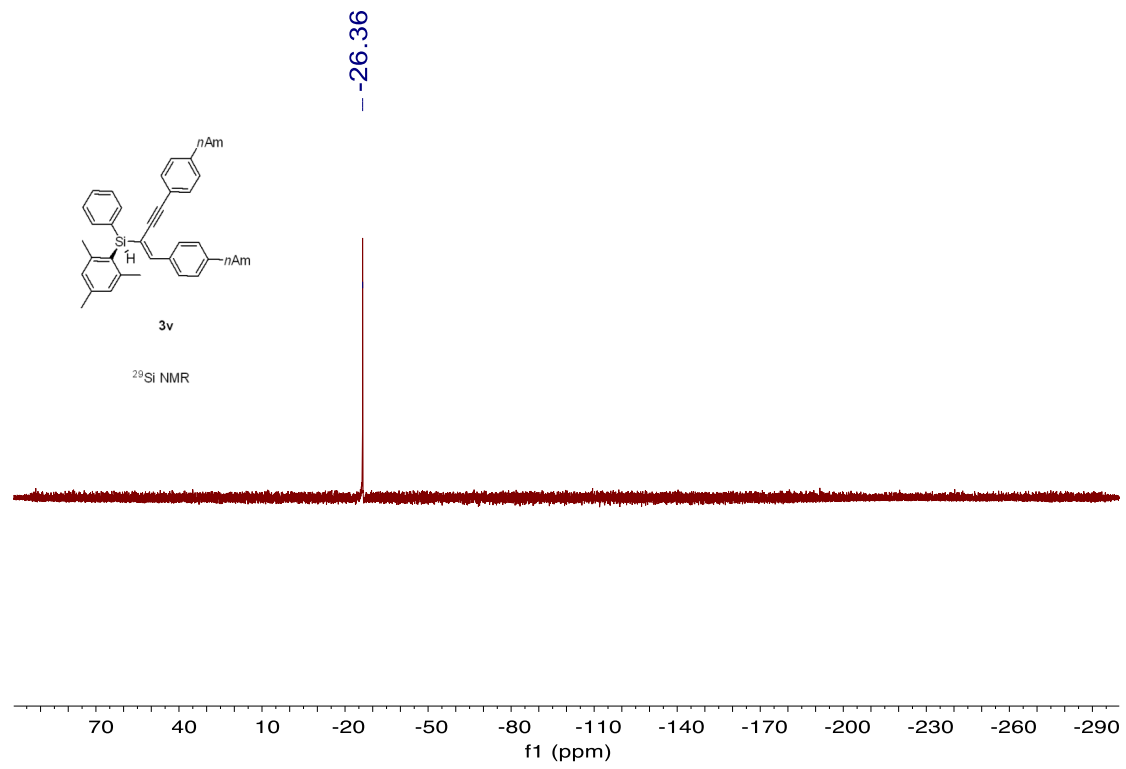

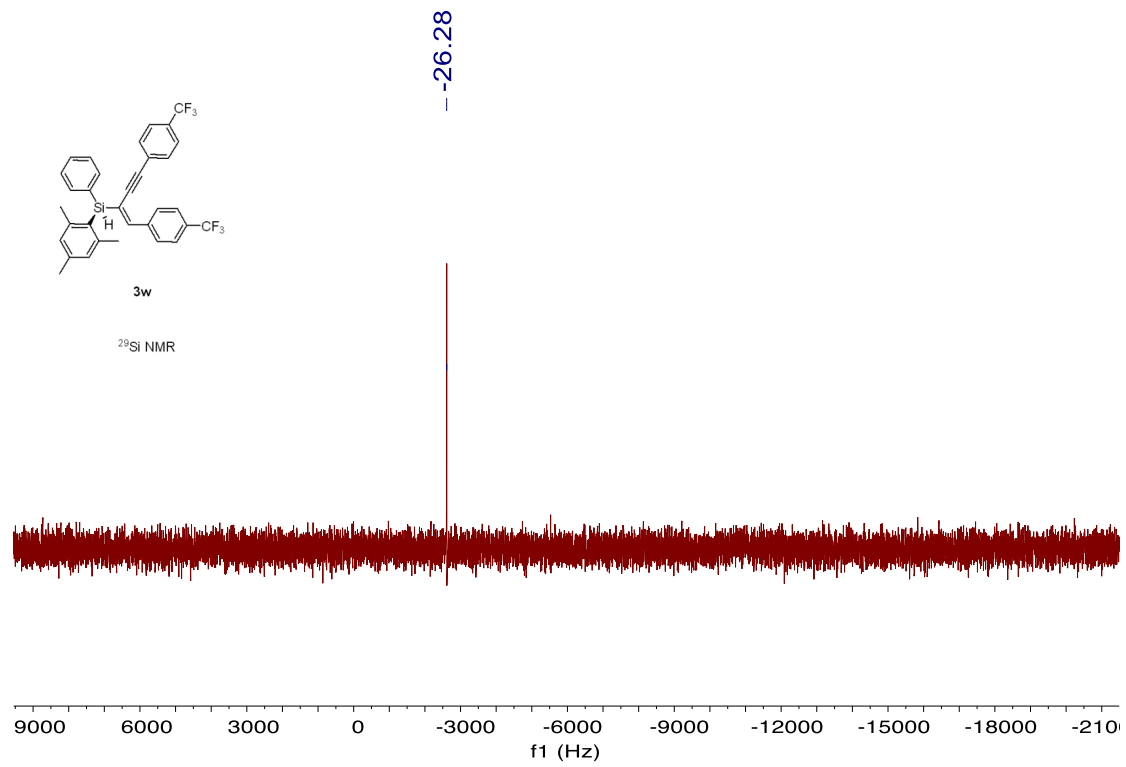



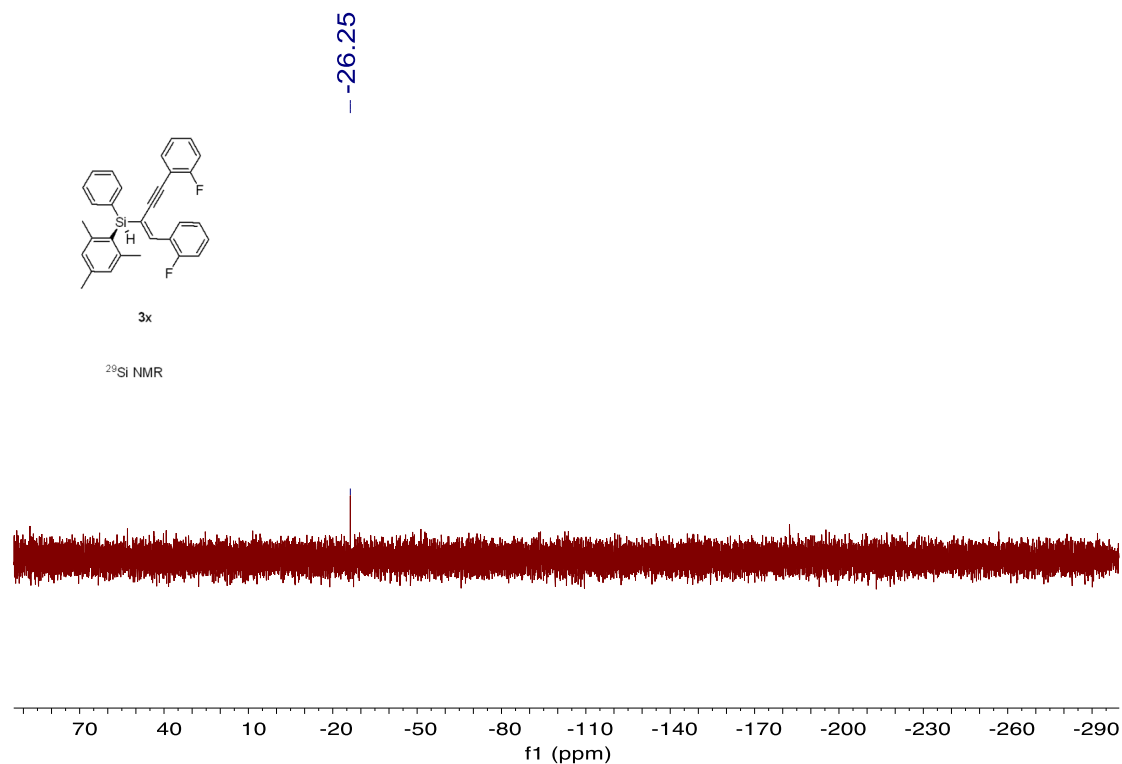

## 5 References

- [1] Tamm, M.; Jones, PG.; Volbeda, MJ.; Lysenko, S.; Sergej Lysenko, DC. *Angew. Chem. Int. - Ed.*, **2012**, *124*, 6861–6865.
- [2] Beller, M.; Jackstell, R.; Franke, R.; Schneider, C.; Yang, J.; Liu, JW. *Angew. Chem. Int. Ed.*, **2020**, *59*, 9032–9040.
- [3] Ohno, H.; Fujii, N.; Oishi, S.; Naoe, S.; Matsuda, Y. *Chem. Eur. J.*, **2015**, *21*, 1463–1467.
- [4] Yin, SF.; Zhou, YB.; Qiu, RH.; Sun, ML.; Liu, L.; Dong, JY.; Su, LB. *J. Am. Chem. Soc.*, **2016**, *138*, 12348–12355.
- [5] Hirokazu, U.; Takeshi, H.; Ryoichi, T.; Hiroaki, S.; Naoki, H. *Angew. Chem. Int. Ed.*, **2010**, *49*, 7762–7764.
- [6] CYLview, 1.0b; Legault, C. Y., Université de Sherbrooke, 2009 (<http://www.cylview.org>)
- [7] Q. Z. Yu. Preparation and application prospect of nano-palladium powder by two-step chemical method. *Precious Metals*, **2010**, *31(02)*, 57-59.
